# Supplementary material
Source: publisher figshare collection journal article supplement (https://tandf.figshare.com/ndownloader/files/24977854)
Supplement: Supplementary file 1 [file 24977854]

## Sheet: Tabel S1
Table S1. Proteomic analysis of BHN100 and BHN418 cultured in CDM and IVM-CDM
CDM: chemically defined medium; IVM-CDM: in vivo-mimicking CDM
Protein FDR HIGH	false discovery rate on protein level <1%
na	not available (or only available in one condition per strain)
	p-value or q-value <0.05 = significant, comparisons by T-tests per protein
q-value	Benjamini-Hochberg corrected
	ratio >1.5 between IVM-CDM and CDM ; increased level
	ratio <0.67 between IVM-CDM and CDM ; decreased level
ON	protein detected in at least 2 replicates of in one growth condition of one strain and not detected in the other growth condition of the same strain
OFF	protein not detected in one growth condition of one strain and detected in at least 2 replicates in the other growth condition of the same strain
	accessions with sp_x refer to proteins that were reannotated using a non-TIGR4 strain as background
Protein properties								Identification overview							Not normalized protein intensities												Median normalized protein intensities												Quantitative comparative analysis
Accession	Gene	GI number	Description	Localization prediction (PsortB)	Number of amino acids	MW [kDa]	Calc. pI	Sequence coverage [%]	Number of peptide spectrum matches	Number of Unique Peptides	Protein FDR Confidence Combined	Exp q-value Combined	Sum PEP Score	Score Sequest HT Sequest HT	BHN100 CDM1	BHN100 CDM2	BHN100 CDM3	BHN100 IVMCDM1	BHN100 IVMCDM2	BHN100 IVMCDM3	BHN418 CDM1	BHN418 CDM2	BHN418 CDM3	BHN418 IVMCDM1	BHN418 IVMCDM2	BHN418 IVMCDM3	BHN100 CDM1	BHN100 CDM2	BHN100 CDM3	BHN100 IVMCDM1	BHN100 IVMCDM2	BHN100 IVMCDM3	BHN418 CDM1	BHN418 CDM2	BHN418 CDM3	BHN418 IVMCDM1	BHN418 IVMCDM2	BHN418 IVMCDM3	Average BHN100CDMIVM / BHN100CDM	P-value BHN100CDMIVM / BHN100CDM	Q-Value BHN100CDMIVM / BHN100CDM	Average BHN418CDMIVM / BHN418CDM	P-value BHN418CDMIVM / BHN418CDM	Q-Value BHN418CDMIVM / BHN418CDM	Annova p-value	Annova q-value
SP_0001	dnaA	15899950	chromosome replication initiator DnaA	Cytoplasmic	453	51.7	6.2	52	198	23	High	0	113.85	583.08	96158962	2.61964e+07	6.64763e+07	3.96662e+07	7.15875e+07	7.62595e+07	6.54765e+07	1.44994e+08	85235045	3.88494e+07	6.40663e+07	5.70802e+07	69085888	61136712	71455216	60227944	72603272	69828352	86965456	77458416	84012256	49471600	57141524	53303368	1.00487	0.960675	0.976588	0.643693	0.00121754	0.0088809	0.00107766	0.00246322
SP_0002	dnaN	15899951	DNA polymerase III subunit beta (EC:2.7.7.7)	Cytoplasmic	378	42	5.16	51	148	14	High	0	86.139	497.1	1.10981e+08	3.42881e+07	7.70603e+07	5.22154e+07	7.08862e+07	7.56362e+07	9.80471e+07	194134743	1.19907e+08	7.42757e+07	8.66243e+07	8.64048e+07	79509104	81114256	82894136	79709352	71892920	69190944	130944240	102631808	118296088	95595464	77050592	80526640	0.906683	0.0860015	0.169388	0.719502	0.0271633	0.0679372	0.00139631	0.00305204
SP_0004	ychF	15899953	GTP-dependent nucleic acid-binding protein EngD	Cytoplasmic	371	41.1	4.91	71	440	26	High	0	192.32	1486.67	3.14034e+08	9.14309e+07	1.93513e+08	1.74939e+08	2.6917e+08	2.92458e+08	2.47627e+08	5.34726e+08	3.22573e+08	1.85008e+08	2.53817e+08	2.86167e+08	220744656	226915696	209348304	275037600	273048160	265487248	336251904	273612960	318171104	241062512	224442320	265331040	1.2383	0.00118149	0.00946685	0.787508	0.0387988	0.087019	0.00210138	0.00429583
SP_0005	SP_0005	15899954	peptidyl-tRNA hydrolase (EC:3.1.1.29)	Cytoplasmic	189	21.4	8.68	30	68	5	High	0	44.504	204.02	1.27214e+07	4.53093e+06	8.32859e+06	5.93931e+06	8.78357e+06	10179418	1.60625e+07	4.82612e+07	2.1142e+07	1.15214e+07	1.42032e+07	1.62304e+07	9459231	9689193	8876850	8612735	8888680	9427058	20908942	26765484	20828128	14417098	12781033	15196418	0.960864	0.343243	0.456353	0.618875	0.00818785	0.0294612	4.69007e-06	3.21605e-05
SP_0006	SP_0006	15899955	transcription-repair coupling factor	Cytoplasmic	1169	134.7	5.6	31	100	28	High	0	114.292	234.76	1.25274e+07	3.45128e+06	8.75495e+06	1.15802e+07	1.6053e+07	1.91808e+07	1.36244e+07	3.20996e+07	1.94407e+07	1.61377e+07	2.55418e+07	2.29478e+07	9312926	7.28017e+06	9326239	17089766	16306916	17690332	17615304	18032396	19151286	20278594	22866114	21452816	1.971	0.0013278	0.010119	1.17881	0.0184775	0.0508782	4.02003e-06	2.92366e-05
SP_0007	SP_0007	15899956	S4 domain-containing protein	Unknown	88	10.1	9.7	49	31	4	High	0	19.55	80.69	1.13161e+07	3.66899e+06	7.45303e+06	8.62011e+06	1.04196e+07	1.19451e+07	1.03561e+07	1.86334e+07	1.27189e+07	7.97116e+06	1.13312e+07	9.62463e+06	8434202	7768207	7935526	12609961	10530119	10989971	13413747	10640670	12541268	9940864	10185677	9042218	1.41396	0.00450084	0.0220503	0.797055	0.0453324	0.0973267	0.0015228	0.00328073
SP_0008	ftsB	15899957	Cell division protein DivIC (FtsB)	Unknown	122	14.8	9.88	52	13	4	High	0	19.845	34.4	223177	186697	910651	861516	1.01252e+06	1.56588e+06	457679	1.41616e+06	510288	1.44263e+06	2.2908e+06	2.39043e+06	178639	341478	962269	1.1937e+06	1.0208e+06	1.46435e+06	562372	885156	504872	1.75386e+06	2.08535e+06	2.25853e+06	2.48171	0.0857358	0.169388	3.12321	0.00342466	0.0162636	0.0110927	0.0180369
SP_0010	SP_0010	15899959	hypothetical protein	Unknown	422	48.1	6.05	13	6	4	High	0.002	8.732	0	4.32245e+06	2.28868e+06	3.60826e+06	1.95432e+06	4.03334e+06	3.08315e+06	779299	3.09758e+06	1.25055e+06	797850	1.3581e+06	1.31591e+06	3.28074e+06	4.7351e+06	3.83417e+06	2.75338e+06	4077442	2863296	964557	1.8827e+06	1.23658e+06	963987	1.24259e+06	1.25025e+06	0.818069	0.278277	0.389521	0.846467	0.560812	0.66515	0.000367865	0.000974476
SP_0011	SP_0011	15899960	MesJ/Ycf62 family protein	Cytoplasmic	425	49.9	8.56	7	7	3	High	0.002	8.665	7.53	814238	398936	590608	788110	544364	767375	371603	787523	593621	541748	629373	1.00716e+06	637041	756521	623183	1.08889e+06	549556	717891	455279	500946	587959	651226	577539	957616	1.16839	0.597256	0.696391	1.41588	0.124444	0.202888	0.258117	0.288668
SP_0012	hpt	15899961	hypoxanthine-guanine phosphoribosyltransferase	Cytoplasmic	180	20.2	5.43	62	264	17	High	0	94.352	753.1	2.19841e+08	5.79724e+07	1.39513e+08	1.38874e+08	1.90535e+08	2.27928e+08	1.73181e+08	3.94772e+08	2.21159e+08	1.63432e+08	2.24416e+08	2.17815e+08	155655824	140782624	150880032	217263392	193823296	207549408	233235680	204068208	217759168	212021904	198092640	202456896	1.38299	0.00189214	0.0128269	0.935134	0.203596	0.301372	9.67392e-05	0.000329793
SP_0013	ftsH	15899962	cell division protein FtsH	CytoplasmicMembrane	652	71.3	5.5	65	750	45	High	0	346.871	2511.95	4.64529e+08	1.71081e+08	3.41483e+08	2.79696e+08	3.76184e+08	4.32987e+08	3.45057e+08	8.10159e+08	4.93568e+08	3.61205e+08	4.79941e+08	5.08258e+08	324595168	437936192	368807008	445013920	381755424	392929440	470205760	408562496	486454528	474788640	422420352	470248096	1.0781	0.460354	0.575936	1.00164	0.964888	0.976543	0.127395	0.153027
SP_0019	SP_0019	15899967	adenylosuccinate synthetase (EC:6.3.4.4)	Cytoplasmic	428	47.5	5.69	61	409	24	High	0	170.642	1431.78	3.22113e+08	9.55812e+07	2.18323e+08	1.7193e+08	2.43123e+08	2.82222e+08	1.56542e+08	3.86976e+08	2.04546e+08	1.51058e+08	2.31822e+08	2.296e+08	226266352	237873264	235356416	270210752	246636544	256438496	211341856	200071680	202006160	196203808	205121296	213557808	1.10549	0.0307412	0.0818944	1.00239	0.947816	0.965932	0.000144446	0.000446741
SP_0020	SP_0020	15899968	cytidine/deoxycytidylate deaminase	Cytoplasmic	155	17.6	4.96	14	5	2	High	0.002	7.709	5.92	4.3079e+06	1.39061e+06	2.60031e+06	1.48221e+06	2.23324e+06	2.59704e+06	1.48692e+06	2.9344e+06	2.19688e+06	1.15799e+06	1.79732e+06	1.52158e+06	3273273	2803829	2757836	2.07606e+06	2.25523e+06	2419067	1.86386e+06	1.7828e+06	2.17543e+06	1.40859e+06	1.64166e+06	1.4389e+06	0.764052	0.018822	0.0583162	0.771056	0.0283555	0.0697297	0.000112954	0.000368328
SP_0021	dut	15899969	deoxyuridine 5'-triphosphate nucleotidohydrolase (EC:3.6.1.23)	Unknown	147	15.8	5.52	84	82	7	High	0	47.689	235.91	1.56163e+07	3.74195e+06	1.2045e+07	1.0327e+07	1.23812e+07	1.21842e+07	1.31097e+07	2.55589e+07	1.67543e+07	3.08765e+07	1.65455e+07	1.39475e+07	11576256	7923781	12806374	15131619	12556838	11265666	16957730	14489938	16586461	39274184	14836971	13046636	1.20577	0.303714	0.414187	1.39813	0.586012	0.686705	0.20827	0.237797
SP_0024	SP_0024	15899971	hypothetical protein	Cytoplasmic	165	18.4	4.58	22	41	3	High	0	23.141	122.96	4.71323e+07	1.45737e+07	2.75484e+07	1.47856e+07	3.06789e+07	3.02603e+07	1.37474e+07	4.10882e+07	1.70116e+07	9.15148e+06	1.28656e+07	1.31682e+07	34262656	33094574	29445242	21931112	31109958	27855380	17746924	22898674	16783724	11434610	11618059	12392059	0.835686	0.171506	0.278906	0.617189	0.00865488	0.0308577	6.33263e-05	0.000238967
SP_0027	SP_0027	15899974	ribose-phosphate pyrophosphokinase (EC:2.7.6.1)	Cytoplasmic	322	35.4	6.02	53	275	19	High	0	152.485	991.79	9.77836e+07	3.2995e+07	6.66158e+07	6.1396e+07	8.44425e+07	9.37477e+07	1.143e+08	2.79514e+08	1.61884e+08	1.2927e+08	1.81612e+08	1.72085e+08	70214064	77890800	71563176	94120832	85593496	85666544	152686528	146326272	159662256	167251344	161163904	159883280	1.2081	0.0135108	0.0459288	1.06458	0.0934873	0.162476	4.81205e-08	1.13225e-06
SP_0032	polA	15899978	DNA polymerase I	Cytoplasmic	877	99.2	5.08	45	326	38	High	0	192.267	1011.39	1.44739e+08	4.58793e+07	9.79775e+07	6.04783e+07	8.83764e+07	1.0073e+08	7.90644e+07	1.93515e+08	1.08064e+08	7.84962e+07	1.12111e+08	9.95758e+07	103365064	110127040	105465496	92708632	89653272	92306928	105334952	102631808	106474944	101076256	99485832	92778384	0.861145	0.00224283	0.0139103	0.932893	0.0697959	0.133775	0.00121478	0.00271459
SP_0033	SP_0033	15899979	conserved_hypothetical_protein	Cytoplasmic	145	16.2	5.4	60	51	9	High	0	39.031	134.29	3.03012e+07	1.05814e+07	2.82843e+07	1.1611e+07	2.43641e+07	2.18557e+07	2.32108e+07	4.8894e+07	3.04433e+07	1.13809e+07	1.67659e+07	1.69777e+07	22217390	23648864	30305378	17089766	24721456	20165094	30303482	27086840	29999940	14289998	15104993	15943890	0.81364	0.218061	0.328501	0.518809	0.000163302	0.00346785	0.00140672	0.0030692
SP_0034	SP_0034	15899980	hypothetical protein	CytoplasmicMembrane	336	36	9.38	12	27	6	High	0	14.376	71.16	28379010	8.09544e+06	1.64093e+07	9.23734e+06	1.22597e+07	1.31799e+07	1.78257e+07	38124650	2.59143e+07	1.25781e+07	1.66353e+07	2.29259e+07	20848514	17831770	17523904	13539341	12455488	12184382	23153282	21280926	25562300	15816209	14926298	21452816	0.679295	0.00383464	0.0200403	0.745685	0.0710501	0.135957	0.0020133	0.00414402
SP_0035	SP_0035	15899981	aromatic amino acid aminotransferase	Cytoplasmic	389	43.2	5.25	57	314	23	High	0	150.12	1048.56	3.5706e+08	1.1722e+08	2.63888e+08	1.09698e+08	1.63887e+08	1.69441e+08	1.14783e+08	2.68757e+08	1.5537e+08	6.71835e+07	8.8119e+07	8.51628e+07	250394288	294051808	285237024	170979296	166404368	154066384	154046768	140766256	152768688	86339720	78376616	79412608	0.592335	0.000861	0.0082289	0.54544	0.000131158	0.00307696	8.12212e-08	1.70417e-06
SP_0037	SP_0037	15899983	glycerol-3-phosphate acyltransferase PlsX	Unknown	330	34.8	5.78	42	140	15	High	0	87.943	438.86	1.09883e+08	3.26509e+07	8.13735e+07	4.57963e+07	6.07253e+07	6.76587e+07	4.89112e+07	116331654	6.10113e+07	3.62068e+07	5.40593e+07	4.66191e+07	78805816	77147768	87536312	69718960	61542892	61994092	64627120	62429608	60164956	46112012	48279372	43535740	0.793692	0.0146917	0.04903	0.736705	0.00109034	0.00858018	1.77576e-05	8.5924e-05
SP_0038	SP_0038	15899984	acyl carrier protein	Cytoplasmic	77	8.8	4.01	22	38	2	High	0	10.494	106.84	52305617	1.39696e+07	3.10134e+07	1.52203e+07	2.5049e+07	2.77365e+07	3.01933e+07	56824023	38522249	1.45961e+07	2.08975e+07	2.14841e+07	37973712	31668536	33208722	22538194	25329852	25476282	39611060	31306022	37986512	18364292	18765072	20146128	0.713113	0.00753329	0.0312591	0.525928	0.00119599	0.0088809	6.71347e-05	0.000251833
SP_0044	SP_0044	15899989	phosphoribosylaminoimidazole-succinocarboxamide synthase (EC:6.3.2.6)	Cytoplasmic	235	27	5.02	71	193	22	High	0	102.476	504.3	1.6204e+08	5.63845e+07	1.14539e+08	9.66915e+07	1.35998e+08	1.48484e+08	8.74011e+07	1.83094e+08	1.20462e+08	1.23381e+08	1.60371e+08	1.43638e+08	115252736	136708816	123839792	149845248	137973984	135009232	116570944	97001352	118296088	159366272	141799056	133947032	1.12514	0.11226	0.206711	1.3111	0.0291702	0.0709888	0.0181296	0.0280354
SP_0045	SP_0045	15899990	phosphoribosylformylglycinamidine synthase	Cytoplasmic	1241	135.5	5.07	45	610	49	High	0	310.576	1999.87	4.6316e+08	1.56162e+08	3.2333e+08	3.54053e+08	4.8677e+08	5.1819e+08	3.14121e+08	7.16367e+08	3.95354e+08	3.86976e+08	5.71049e+08	6.15318e+08	323223840	397705600	349264704	565776000	494554176	469650592	427322176	362636192	389034176	509477152	501945888	568875584	1.42963	0.0120576	0.0426034	1.34038	0.00895969	0.0314662	0.00147552	0.00318457
SP_0046	SP_0046	15899991	amidophosphoribosyltransferase (EC:2.4.2.14)	Cytoplasmic	480	52.8	5.71	35	129	16	High	0	84.96	401.3	4.38358e+07	1.49107e+07	2.95772e+07	3.50834e+07	5.11305e+07	5.52113e+07	35896616	7.23499e+07	4.76758e+07	5.18071e+07	7.52088e+07	7.81138e+07	31903796	33808660	31703118	53093328	51802612	50597908	47215664	39529512	47056004	66313124	66967976	72819144	1.59619	4.60334e-05	0.00213254	1.54035	0.00271908	0.0143026	2.75974e-06	2.15045e-05
SP_0047	SP_0047	15899992	phosphoribosylaminoimidazole synthetase (EC:6.3.3.1)	Cytoplasmic	340	36.5	4.82	49	185	16	High	0	91.917	634.8	5.45583e+07	1.41973e+07	3.76808e+07	4.21119e+07	5.71258e+07	7.61052e+07	3.33193e+07	7.86603e+07	4.77828e+07	5.60508e+07	8.364e+07	8.13968e+07	39612844	32143554	40417620	63958276	57890028	69646352	43744360	42907064	47154636	71897576	74398128	75884104	1.70712	0.0040626	0.0206855	1.66046	0.000101968	0.0027816	2.76021e-05	0.000120885
SP_0048	purN	15899993	phosphoribosylglycinamide formyltransferase (EC:2.1.2.2)	Cytoplasmic	181	20.2	4.89	14	6	2	High	0.002	8.624	20.42	1.35799e+06	575552	1.03465e+06	1.68708e+06	2.16905e+06	2.46899e+06	978638	2.78466e+06	1.34106e+06	3.37889e+06	4.03418e+06	4.33165e+06	1.05455e+06	1.11219e+06	1088499	2.37814e+06	2.1945e+06	2298689	1.21657e+06	1.6945e+06	1.32554e+06	4.16584e+06	3656620	4.08246e+06	2.11085	1.16704e-05	0.00137127	2.81001	0.000628941	0.00619957	8.63381e-07	8.93153e-06
SP_0050	purH	15899995	bifunctional phosphoribosylaminoimidazolecarboxamide formyltransferase/IMP cyclohydrolase (EC:	Cytoplasmic	515	56.3	5.15	63	390	35	High	0	234.727	1316.65	3.69098e+08	1.24085e+08	2.71975e+08	2.36812e+08	3.12659e+08	3.67723e+08	2.50697e+08	5.49261e+08	3.45133e+08	3.42571e+08	4.5135e+08	4.6568e+08	258656592	312545408	293916864	375179232	317746592	334209120	340383200	280530400	339823808	450795232	397056352	431510784	1.18728	0.0813258	0.163775	1.33165	0.0176089	0.0493898	0.00437237	0.00796183
SP_0051	SP_0051	15899996	phosphoribosylamine--glycine ligase (EC:6.3.4.13)	Cytoplasmic	420	45.5	4.93	67	172	24	High	0	128.309	551.71	1.07013e+08	3.57278e+07	7.39476e+07	6.83266e+07	9.25847e+07	1.18771e+08	6.79723e+07	1.90353e+08	9.7895e+07	8.19372e+07	1.26535e+08	1.29815e+08	76694576	84592888	79440168	104964128	93916336	108670784	90337832	100585384	96524960	105516688	112719264	120972432	1.27759	0.00971048	0.0371227	1.18007	0.0306311	0.0731778	0.00102958	0.0023714
SP_0053	SP_0053	15899998	phosphoribosylaminoimidazole carboxylase catalytic subunit	CytoplasmicMembrane	162	16.9	7.5	88	158	15	High	0	88.908	436.51	6.79686e+07	2.31076e+07	5.39058e+07	4.19756e+07	7.13074e+07	8.41097e+07	6.7912e+07	1.45866e+08	9.26393e+07	8.70978e+07	1.31619e+08	1.15276e+08	49140076	53567264	57867848	63802500	72298760	76930304	90203040	77974488	91303184	112312080	117128256	107064608	1.32668	0.0177196	0.0558407	1.29684	0.0100604	0.0340082	2.1364e-05	9.86033e-05
SP_0054	SP_0054	15899999	phosphoribosylaminoimidazole carboxylase ATPase subunit (EC:4.1.1.21)	CytoplasmicMembrane	363	39.4	5	31	88	10	High	0	61.342	277.1	2.80159e+07	1.149e+07	2.11907e+07	3.28086e+07	3.31763e+07	3.83139e+07	1.99436e+07	3.55745e+07	3.05393e+07	3.65999e+07	5.18196e+07	5.39738e+07	20560134	25760822	22676028	49534324	33645428	35169712	25930376	19929578	30098490	46628564	46239620	50420392	1.71528	0.0188821	0.0583162	1.88641	0.00633077	0.0251683	0.00138998	0.00304374
SP_0055	SP_0055	15900000	hypothetical protein	Unknown	75	8.6	4.35	27	3	1	High	0.003	7.105	13.69	369434	105860	198002	460424	654873	2786268	358279	802502	457920	837896	871628	1.17306e+06	292926	188190	207873	627549	661784	2.59495e+06	437881	510161	453432	1.013e+06	798989	1.10869e+06	5.63767	0.0351011	0.0899515	2.084	0.00254183	0.0138677	0.00780843	0.0132909
SP_0056	purB	15900001	adenylosuccinate lyase (EC:4.3.2.2)	Cytoplasmic	432	49.6	5.36	78	728	43	High	0	307.558	2445.54	7.2064e+08	2.54574e+08	5.27177e+08	5.09711e+08	6.74668e+08	7.84414e+08	5.01635e+08	1.13552e+09	6.81135e+08	5.60515e+08	8.2104e+08	7.88312e+08	499337088	666137024	570965568	822219136	685643968	709385856	688240064	568493440	670433856	742365632	720040640	728204224	1.27689	0.0684266	0.142474	1.1367	0.0952751	0.164592	0.049696	0.0664192
SP_0057	strH	15900002	beta-N-acetylhexosaminidase	Cellwall	1312	144.5	5.25	2	2	2	High	0.002	7.655	2.2	180079	63216	134790				276016	245233	433723				144750	109362	141515	na	na	na	336204	161942	429690	na	na	na	OFF	na	na	OFF	na	na	0.0632479	0.0820513
SP_0058	SP_0058	15900003	GntR family transcriptional regulator	Unknown	238	27.9	6.44	57	315	21	High	0	151.448	933.41	2.41719e+08	6.29749e+07	1.51436e+08	1.22778e+08	2.0348e+08	2.13315e+08	1.85639e+08	4.80442e+08	259485155	1.55982e+08	2.59669e+08	2.66607e+08	170928240	153547952	162783648	191694624	206009664	193959120	251047808	246374000	255170688	202792400	229709712	247769984	1.21427	0.00700385	0.0300238	0.903905	0.153248	0.238408	0.000127401	0.000402319
SP_0061	SP_0061	15900006	PTS system transporter subunit IIB	Cytoplasmic	158	17.2	8.13	25	7	3	High	0.002	9.4	16.65	232146	75195.3	232779				302973	1.39169e+06	448866	198866	354224	296358	185716	131254	244777	na	na	na	369636	867073	444529	235795	326234	281978	OFF	na	na	0.502015	0.0850155	0.15437	0.0212578	0.0320872
SP_0066	galM	15900011	aldose 1-epimerase	Cytoplasmic	345	37.8	4.81	12	4	2	High	0.002	5.117	2.35	1.09532e+06	520546	848027	402503	976778	841958	264841	717447	458755	274254	330655	439983	856209	1.001e+06	895468	548057	987425	787731	322598	457248	454422	326109	305170	418517	0.843983	0.331829	0.443706	0.850541	0.350215	0.456955	0.000901569	0.00211719
SP_0075	SP_0075	15900020	phosphorylase Pnp/Udp family protein	Cytoplasmic	254	28.2	4.46	27	33	4	High	0	27.714	120.75	2.98523e+07	7.53636e+06	2.12022e+07	5.04354e+06	9.19194e+06	1.42212e+07	1.75106e+07	39422237	2.42883e+07	7.10402e+06	8.74332e+06	8.45606e+06	21929330	16540088	22676028	7.27922e+06	9304076	13102766	22757014	21982436	23984306	8841512	7.89108e+06	7955809	0.485499	0.0198582	0.0598312	0.359241	2.11544e-05	0.0013807	0.000177287	0.000526992
SP_0078	SP_0078	15900023	Trk family potassium uptake protein	CytoplasmicMembrane	459	50.1	9.91	5	22	3	High	0.002	8.168	42.15	4.83072e+06	1.58296e+06	3.56077e+06	3.76002e+06	4.10902e+06	4.63543e+06	5.083e+06	7.69304e+06	5.7565e+06	4.76653e+06	8138375	7.04074e+06	3.66068e+06	3.20741e+06	3.78085e+06	5.39277e+06	4.15844e+06	4.30491e+06	6478576	4.53085e+06	5691461	5907222	7352710	6.62513e+06	1.30117	0.0538673	0.117401	1.19066	0.212033	0.310119	0.00265977	0.00523234
SP_0079	SP_0079	15900024	Trk family potassium uptake protein	Cytoplasmic	221	23.9	4.77	68	145	12	High	0	79.469	560.11	2.1742e+08	63421071	1.41661e+08	7.83541e+07	1.16742e+08	1.30997e+08	1.45198e+08	3.51865e+08	1.9951e+08	1.03051e+08	1.58767e+08	1.64354e+08	153571216	154571312	153044352	120882416	118684296	119572936	194944192	182554128	197082976	133124512	140918720	152474768	0.778729	2.07523e-06	0.000604929	0.742311	0.00290164	0.0146699	4.29545e-06	3.05002e-05
SP_0083	rr8	15900027	DNA-binding response regulator	Cytoplasmic	232	26.7	5.49	31	29	5	High	0	20.198	66.32	1.09588e+07	3.52998e+06	7.83011e+06	2.05824e+06	3011275	4.64231e+06	7.00016e+06	1.51641e+07	8.6654e+06	4.74617e+06	6.26049e+06	5.71208e+06	8.21426e+06	7.45745e+06	8.34195e+06	2912496	3044749	4.30491e+06	8972368	8754372	8564153	5.88212e+06	5.66403e+06	5.37785e+06	0.427347	0.00253265	0.0149684	0.643721	0.000112873	0.00291233	2.72095e-05	0.000119602
SP_0084	hk8	15900028	sensor histidine kinase	CytoplasmicMembrane	350	38.8	5.58	18	34	5	High	0	30.657	101.39	5.11974e+06	1.19484e+06	3.8011e+06	1.92625e+06	3.84274e+06	3.06063e+06	3.80685e+06	1.11073e+07	4.70639e+06	2.62307e+06	5473637	5.85734e+06	3.8764e+06	2.38197e+06	4.03679e+06	2.72447e+06	3.88507e+06	2.84479e+06	4836973	6460385	4.65467e+06	3.21773e+06	4.95352e+06	5.51855e+06	0.918328	0.743765	0.816126	0.858185	0.437483	0.545343	0.0919016	0.114519
SP_0085	rpsD	15900029	3S ribosomal protein S4	Cytoplasmic	203	23	10.15	91	774	28	High	0	154.809	2222.69	1.73233e+09	5.59462e+08	1.18099e+09	1.00464e+09	1.44983e+09	1.60538e+09	1.15849e+09	2.56604e+09	1.5059e+09	1.28744e+09	1.88789e+09	1.97157e+09	1179386752	1518259200	1282560896	1638268288	1473730048	1451667456	1611465600	1247308800	1485664640	1726927744	1648770560	1814100224	1.14659	0.16656	0.27392	1.19458	0.0856937	0.155121	0.0579588	0.0760947
SP_0086	SP_0086	na	pseudogene	Extracellular	58	6.9	9.2	53	9	2	High	0.002	9.306	13.37	4.99541e+06	1.12712e+06	3.52024e+06	3.71112e+06	5.32582e+06	6.20551e+06	2.23216e+06	4.41505e+06	2.81459e+06	5.33372e+06	6.14455e+06	5.89848e+06	3.78716e+06	2.25608e+06	3.7382e+06	5.31935e+06	5393908	5753341	2.8073e+06	2.65278e+06	2.7781e+06	6.61094e+06	5556149	5556088	1.68345	0.0335727	0.0870296	2.15135	0.000227526	0.00403317	0.000684687	0.0016565
SP_0095	SP_0095	15900038	conserved_hypothetical_protein	Cytoplasmic	328	37.9	5.24	57	320	22	High	0	165.769	1074.06	5.47686e+08	1.58159e+08	3.78982e+08	5.05897e+07	1.01221e+08	8.10765e+07	3.21788e+08	7.87109e+08	5.56228e+08	5.29829e+07	8.12596e+07	9.97296e+07	381403488	403058112	410079744	77208952	102442440	74199080	438383584	397341568	547458048	67870832	72364280	92871432	0.212509	0.000114822	0.00305571	0.168529	0.000188948	0.00363339	4.08918e-07	5.22024e-06
SP_0097	SP_0097	15900040	conserved_domain_protein	CytoplasmicMembrane	354	40.3	4.73	20	65	8	High	0	43.189	197.29	2.55269e+07	6.73859e+06	1.43141e+07	7.15518e+06	1.11575e+07	1.21416e+07	2.44065e+07	6.42993e+07	3.38438e+07	8.52991e+06	1.50709e+07	1.53638e+07	18755988	14703150	15271636	10427985	11340786	11173756	31896300	35293340	33352472	10649412	13585771	14448807	0.676011	0.00843499	0.0334847	0.384754	0.000593632	0.00597765	7.28563e-06	4.43795e-05
SP_0098	SP_0098	15900041	hypothetical_protein	Unknown	303	34.2	7.08	38	43	9	High	0	45.969	116.23	7.89182e+06	2.80455e+06	4.00275e+06	3.62054e+06	4.32053e+06	4.2796e+06	1.60105e+07	4.32881e+07	2.24686e+07	4.97042e+06	8.30391e+06	1.00463e+07	5.92725e+06	5847666	4250121	5187273	4.37109e+06	3.97248e+06	20777034	24082388	22208976	6158426	7.49629e+06	9397977	0.844357	0.287614	0.398287	0.343719	0.00112105	0.00869533	7.84433e-06	4.63704e-05
SP_0099	SP_0099	15900042	hypothetical protein	CytoplasmicMembrane	197	21.3	6.8	6	3	1	High	0.005	4.383	10.3	659147	280689	516992	325621	540522	555023	987094	2521171	1.38884e+06	440195	517549	454662	517703	523601	544862	441108	546524	520287	1.22667e+06	1.54106e+06	1.37496e+06	527139	476211	432728	0.950669	0.459559	0.575559	0.346653	0.000263164	0.00411589	2.07036e-06	1.7253e-05
SP_0100	SP_0100	15900043	hypothetical protein	Unknown	108	12.4	5.45	20	2	2	High	0.002	6.02	3.25								650162	240068	120079	102018	194427	na	na	na	na	na	na	na	415880	237725	141191	94750.5	185111	na	na	na	0.429467	0.0814834	0.149367	0.0814835	0.102308
SP_0102	SP_0102	15900045	glycosyl transferase family protein	CytoplasmicMembrane	385	44.4	9.31	16	25	5	High	0	23.25	62.75	5.34556e+06	1.70014e+06	3.68468e+06	2.63382e+06	3.44915e+06	4.48095e+06	2.39976e+06	7.35653e+06	3.21792e+06	2905744	4.80948e+06	5327278	4.04733e+06	3.46356e+06	3.90881e+06	3740091	3.4902e+06	4157179	3.02481e+06	4342775	3.18311e+06	3.5791e+06	4359419	5021278	0.997178	0.965128	0.976857	1.22834	0.234627	0.335231	0.408869	0.440829
SP_0103	SP_0103	15900046	capsular polysaccharide biosynthesis protein	CytoplasmicMembrane	616	69.2	8.6	49	253	27	High	0	149.048	832.02	1.36511e+08	4.72158e+07	9.53401e+07	6.55775e+07	9.18901e+07	9.75496e+07	8.66532e+07	2.11782e+08	1.21606e+08	7.67807e+07	1.02273e+08	1.02489e+08	97761552	113402752	102548448	100717776	93205576	89123392	115622576	111822856	120266032	98857128	90657680	95005632	0.902248	0.14454	0.247843	0.818266	0.00356528	0.0167955	0.00628278	0.0109424
SP_0104	SP_0104	15900047	HAD superfamily hydrolase	Cytoplasmic	210	23.4	5.01	10	5	2	High	0.003	6.449	9.46							555477	1.80588e+06	718026	431210	507684	620870	na	na	na	na	na	na	683542	1.11916e+06	710593	516209	467076	589896	na	na	na	0.625943	0.0602624	0.120628	0.0602624	0.0788603
SP_0105	sdhA	15900048	L-serine dehydratase, iron-sulfur-dependent subunit alpha	CytoplasmicMembrane	290	30.4	4.69	19	28	5	High	0	22.38	90.26	1.31103e+07	2.70567e+06	6.15492e+06	4290474	4.51128e+06	7.59535e+06	9.55693e+06	2.35979e+07	1.28695e+07	6.23471e+06	1.09593e+07	10374252	9751713	5650534	6.54579e+06	6.17228e+06	4563494	7.03418e+06	12314003	13394233	12738597	7744030	9916968	9772421	0.809638	0.390029	0.503068	0.713542	0.0148838	0.0437635	0.00569703	0.0100241
SP_0106	SP_0106	15900049	L-serine dehydratase, iron-sulfur-dependent subunit beta	Cytoplasmic	223	24.3	6.96	5	7	1	High	0.003	4.709	20.27	4.16131e+06	1.94575e+06	2.88092e+06	1.65895e+06	3.27304e+06	2.26933e+06	1.48913e+06	3662855	2.13492e+06	1.30321e+06	1.97835e+06	1344499	3.16137e+06	4000047	3.05609e+06	2.33493e+06	3307968	2.11343e+06	1.86386e+06	2.21051e+06	2.10627e+06	1.5811e+06	1.80473e+06	1.26912e+06	0.759121	0.147071	0.249251	0.75315	0.0637588	0.125696	0.00285906	0.0055426
SP_0107	SP_0107	15900050	LysM domain-containing protein	Unknown	195	20.9	4.7	24	15	3	High	0	13.732	30.2	5.01016e+06	2.1435e+06	3.67767e+06	3.21614e+06	5.48144e+06	6.26077e+06	3.05182e+06	7.57574e+06	3.14941e+06	3.29097e+06	4.20475e+06	5.41508e+06	3.7946e+06	4.41009e+06	3.90881e+06	4601243	5.54583e+06	5799430	3858573	4.46819e+06	3113962	4053383	3.80985e+06	5.10574e+06	1.31642	0.0322362	0.084984	1.13358	0.404474	0.51181	0.0792518	0.0998973
SP_0110	SP_0110	15900053	hypothetical protein	CytoplasmicMembrane	702	80.7	8.02	9	34	6	High	0	20.861	93.29	3.19618e+06	1.33143e+06	1.98445e+06	1.39783e+06	2.0809e+06	1.881e+06	1.24036e+06	2.28868e+06	1.33791e+06	1.00998e+06	1.42825e+06	1.55725e+06	2443342	2.67694e+06	2.09792e+06	1.96125e+06	2103418	1.75194e+06	1.54665e+06	1.40489e+06	1.32554e+06	1.22409e+06	1.30613e+06	1.47661e+06	0.805825	0.0738915	0.151419	0.936815	0.403651	0.511321	0.000268747	0.000736294
SP_0111	SP_0111	15900054	amino acid ABC transporter ATP-binding protein	CytoplasmicMembrane	213	23.6	6.95	23	33	5	High	0	22.191	71.25	1.01005e+07	3.09778e+06	6.64324e+06	3.44809e+06	5.24968e+06	5.69676e+06	4.84131e+06	1.01879e+07	6.0263e+06	4.02649e+06	5.29616e+06	5.12309e+06	7553804	6506977	7.06949e+06	4938016	5312896	5283049	6167798	5.95334e+06	5958042	4979131	4.80054e+06	4824196	0.735152	0.00337188	0.0183406	0.807772	0.000198331	0.00369273	3.51537e-05	0.000146474
SP_0112	SP_0112	15900055	amino acid ABC transporter substrate-binding protein	Unknown	268	29.2	6.87	51	46	12	High	0	62.418	145.7	7.98914e+06	1.64539e+06	6.63456e+06	4.34901e+06	7844163	7.53933e+06	3.82987e+07	8.51867e+07	4.72121e+07	1.42579e+07	1.86569e+07	2.01808e+07	6001005	3.35672e+06	7.05881e+06	6.26066e+06	7.93636e+06	6978919	50423600	46328044	46563028	17981762	16801774	18932536	1.28992	0.276129	0.387912	0.374812	2.41805e-05	0.00141819	4.5033e-06	3.13354e-05
SP_0114	SP_0114	15900056	hypothetical protein	Unknown	106	12.6	8.41	8	9	1	High	0.002	5.985	0					3553.83	3331.95	203621	464607	250206	207686	220380	224234	na	na	na	na	3572.4	3200.69	247319	300857	247622	246611	203362	213618	ON	na	na	0.833868	0.106605	0.180444	1.5326e-07	2.4853e-06
SP_0117	pspA	15900059	surface protein A	Extracellular	744	82.7	4.91	40	364	27	High	0	194.784	1324.74	1.79273e+08	7.03485e+07	1.4957e+08	2.32255e+08	4.52723e+08	3.95107e+08	1.28819e+08	3.56349e+08	2.00163e+08	7.05147e+07	1.49584e+08	1.4322e+08	127118832	172274240	161701312	367077952	460002080	358606272	173113456	184558192	197082976	90640264	132991576	133020488	2.57146	0.00148701	0.0108973	0.642901	0.0267065	0.0672247	7.32893e-05	0.000265895
SP_0118	mnmA	15900060	tRNA-specific 2-thiouridylase MnmA (EC:2.1.1.61)	Cytoplasmic	373	41.7	5.26	45	144	13	High	0	86.501	475.62	6.40435e+07	1.84697e+07	4.3153e+07	2.63864e+07	3.99015e+07	4.46645e+07	3.07568e+07	7.80104e+07	4.04565e+07	2.5373e+07	3.03203e+07	2.8179e+07	46299976	42430196	46339388	39663460	40440924	41015672	40410520	42538044	39958284	32195794	27140394	26396594	0.896724	0.0245881	0.0687522	0.697543	0.00500661	0.0216658	9.14557e-05	0.000317187
SP_0119	SP_0119	15900061	MutT/nudix family protein	Cytoplasmic	151	17.3	5.01	15	12	2	High	0.001	9.596	25.35	221820		185229	128690	196751	234272	2.41433e+06	4.84373e+06	3.23438e+06	2.07422e+06	2777384	2.83195e+06	177852	na	194173	170736	198857	220291	3.03762e+06	2.89606e+06	3.19299e+06	2533928	2.52843e+06	2.6726e+06	1.05707	0.648207	0.735223	0.84751	0.00790822	0.0290033	1.17506e-09	9.40048e-08
SP_0120	gidA	15900062	tRNA uridine 5-carboxymethylaminomethyl modification protein GidA	Cytoplasmic	637	71	5.96	48	277	31	High	0	173.297	929.67	9.43086e+07	2.85433e+07	6.15705e+07	5.34985e+07	7.52012e+07	8.56304e+07	7.69481e+07	1.83728e+08	1.08193e+08	6.44078e+07	9.85627e+07	9.62783e+07	67745528	66781844	66170064	81742320	76256696	78295424	102359696	97513592	106474944	82693328	87654320	89716296	1.17737	0.00158987	0.0114431	0.848916	0.00958463	0.0327777	3.5644e-06	2.6241e-05
SP_0121	rnj	15900063	metallo-beta-lactamase superfamily protein	Cytoplasmic	559	61	5.9	47	346	24	High	0	149.032	1052.78	2.45101e+08	6.82182e+07	1.61289e+08	1.35245e+08	2.03874e+08	2.25522e+08	1.58932e+08	4.11046e+08	2.18553e+08	1.50898e+08	2.28491e+08	2.30348e+08	173008576	166876768	173608352	210864384	207025952	205737056	214076160	212053104	215790848	196203808	201606880	213557808	1.21448	0.000186072	0.00361599	0.952406	0.124871	0.203154	2.01382e-05	9.49347e-05
SP_0122	SP_0122	15900064	conserved_hypothetical_protein	Cytoplasmic	77	9.3	4.6	60	69	5	High	0	25.064	211.09	1.02704e+08	3.23884e+07	7.13775e+07	4.03657e+07	5.21305e+07	6.73147e+07	8.05095e+07	1.98712e+08	1.21923e+08	5.45531e+07	5.90041e+07	64017409	73878224	76404952	76742344	61315460	52817096	61629512	107228832	105187720	120266032	69948752	52622892	59718348	0.774195	0.00767169	0.0314215	0.54794	0.00277839	0.014385	9.53567e-05	0.000326006
SP_0127	SP_0127	15900069	hypothetical protein	Unknown	227	25.3	5.8	19	18	4	High	0	12.961	33.85	6.47649e+06	1.61608e+06	4.44063e+06	2.68165e+06	658905	2.27654e+06	3.04763e+06	7.07129e+06	4.27116e+06	2.18328e+06	3.65185e+06	3.86e+06	4885286	3.29269e+06	4719607	3.8129e+06	665830	2.1227e+06	3858573	4.17726e+06	4220161	2.67051e+06	3.31393e+06	3.64095e+06	0.511835	0.170273	0.277288	0.785362	0.0604435	0.120782	0.153456	0.181426
SP_0129	gcp	15900071	DNA-binding/iron metalloprotein/AP endonuclease	Cytoplasmic	336	36.2	4.93	32	73	12	High	0	59.365	192.88	2.24376e+07	7.1037e+06	1.60034e+07	8.40203e+06	1.42639e+07	1.44857e+07	1.2702e+07	2.46801e+07	1.68629e+07	1.14149e+07	1.67267e+07	1.58476e+07	16514338	15528472	17094796	12280546	14482415	13378212	16431917	13997238	16685076	14289998	15015652	14822658	0.816913	0.021131	0.0619796	0.936624	0.341958	0.4512	0.0329962	0.0468585
SP_0144	SP_0144	15900082	hypothetical protein	CytoplasmicMembrane	221	25.3	9.55	7	5	2	High	0.002	4.956	9.51	1.08532e+06	557984	1.2008e+06	545886	1.91684e+06	1.40496e+06	54513.2	217926	138054		84691.9	99962.2	848565	1.07574e+06	1.26893e+06	747920	1.9415e+06	1306520	64713.4	144657	136750	na	78773.7	95661.8	1.25138	0.613072	0.704658	0.75596	0.560051	0.664919	9.25203e-05	0.000319538
SP_0145	SP_0145	15900083	hypothetical protein	CytoplasmicMembrane	408	44.9	8.69	5	4	2	High	0.003	6.523	13.1	6.30272e+06	1.69327e+06	4.00083e+06	1.43088e+06	2.122e+06	2.40469e+06	518581	1.74677e+06	785538	738538	964925	1.07574e+06	4752001	3.44219e+06	4250121	2.00428e+06	2.1439e+06	2.23386e+06	638529	1.08328e+06	777838	891760	883628	1.02372e+06	0.512848	0.00269925	0.0156583	1.1198	0.449952	0.557492	6.26274e-06	3.95542e-05
SP_0148	SP_0148	15900086	ABC transporter substrate-binding protein	Unknown	276	30.6	5.26	65	254	19	High	0	128.526	774.8	1.35325e+08	6.34507e+07	9.61781e+07	7.97333e+07	1.03416e+08	1.15542e+08	1.03521e+08	2.5781e+08	1.42798e+08	1.33672e+08	1.83401e+08	1.77505e+08	96360096	154827104	103521120	122934832	104472720	105944120	139091632	135197920	140949984	173826176	162043616	165438480	0.939791	0.800637	0.860408	1.20727	0.00147216	0.00986766	0.0227181	0.0338235
SP_0149	metQ	15900087	D-Methionin-Transportsystem Substrat-bindendes Protein	CytoplasmicMembrane	284	31.2	5.63	76	260	23	High	0	150.668	824.59	9.73067e+07	3.28536e+07	6.33599e+07	8.35526e+07	1.12923e+08	1.29384e+08	5.98485e+07	1.74332e+08	8.67076e+07	1.05289e+08	1.38487e+08	1.41396e+08	69861408	77642840	68111432	129097280	114624016	117756232	79283584	92386112	85490272	135745888	122417344	131167280	1.67649	0.000659606	0.00692884	1.51396	0.00148876	0.00988252	1.15002e-05	6.21172e-05
SP_0150	SP_0150	15900088	hypothetical protein	Cytoplasmic	457	51.4	5.02	37	83	13	High	0	60.083	231.91	7.94679e+07	2.79942e+07	5.46911e+07	3.59167e+07	6.71381e+07	5.52677e+07	3.65388e+07	9.4233e+07	4.84085e+07	2.59914e+07	3.27787e+07	3.54665e+07	57289212	65552660	58730240	54332564	68036840	50689156	48017424	51050464	47746100	32967098	29364850	33200336	0.953112	0.60878	0.70281	0.650703	0.000676546	0.00645194	0.000118691	0.000382873
SP_0151	SP_0151	15900089	ABC transporter ATP-binding protein	CytoplasmicMembrane	353	38.8	6.38	66	193	19	High	0	102.071	674.51	1.35933e+08	4.51506e+07	9.39343e+07	6.21168e+07	1.03719e+08	9.83329e+07	9.9594e+07	2.23846e+08	1.28799e+08	6.96438e+07	9.86894e+07	9.94647e+07	97060904	108364568	101035872	95219816	105487728	89851152	133116040	117935824	127161272	89466832	87742720	92685936	0.948109	0.392605	0.505832	0.713607	0.000970712	0.00792874	0.00068607	0.00165651
SP_0153	SP_0153	15900091	hypothetical protein	CytoplasmicMembrane	189	20.1	9.86	8	6	2	High	0.002	5.319	12.69	2.85684e+06	796189	1.85665e+06	1.45675e+06	1.88614e+06	904910	1.59858e+06	3.83256e+06	2.79698e+06	105451	876268	1.13869e+06	2.18816e+06	1561855	1.97028e+06	2.04734e+06	1.91114e+06	846372	2.00371e+06	2.30969e+06	2.76822e+06	123313	802630	1.08037e+06	0.839965	0.475395	0.589669	0.283313	0.0805763	0.148844	0.0651796	0.0840123
SP_0156	rr7	15900094	DNA-binding response regulator	Cytoplasmic	428	49.3	5.02	9	6	3	High	0	10.586	16.69	1.70135e+06	457654	1.10704e+06	687485	1.01849e+06	1.47071e+06	940488	2.21715e+06	1.24177e+06	1.07798e+06	1.48708e+06	1.29834e+06	1.3129e+06	874348	1.17339e+06	946227	1030918	1.37152e+06	1.16736e+06	1.36336e+06	1.22669e+06	1.31015e+06	1.36058e+06	1.23138e+06	0.996436	0.989763	0.994882	1.03851	0.511211	0.618196	0.459813	0.489597
SP_0157	SP_0157	15900095	hypothetical protein	CytoplasmicMembrane	177	19.8	8.27	15	19	2	High	0	9.732	64.62	1.74707e+07	5.07196e+06	1.62859e+07	9.12224e+06	1.30289e+07	1.52864e+07	6.01697e+06	1.3966e+07	1.00802e+07	6.72462e+06	1.06727e+07	1.04794e+07	12959334	10904955	17416660	13359336	13164918	14112620	7.69793e+06	8085391	9975524	8361912	9648205	9866011	0.984398	0.984841	0.992387	1.0822	0.432092	0.540922	0.00723329	0.0124533
SP_0158	SP_0158	15900096	flavoprotein NrdI	Cytoplasmic	156	17.6	5.31	42	60	6	High	0	28.88	129.54	5.42688e+07	1.46215e+07	3.98654e+07	1.88826e+07	2.42184e+07	2.43539e+07	6.11548e+07	1.11816e+08	7.78142e+07	39880429	5.14467e+07	5.51717e+07	39399176	33094574	42785880	28170204	24518638	22455150	81169224	60347420	76720776	50893932	45884844	51536372	0.651841	0.0131758	0.0451505	0.679605	0.0179782	0.0498545	3.50679e-05	0.000146474
SP_0159	SP_0159	15900097	hypothetical protein	CytoplasmicMembrane	420	45.9	9.17	6	21	3	High	0.002	8.589	56.35	4.56877e+07	1.43056e+07	3.05076e+07	1.06247e+07	1.45474e+07	1.49208e+07	2.03819e+07	4.53089e+07	3.16583e+07	1.03761e+07	1.19789e+07	15196203	33262218	32381062	32670936	15583024	14685161	13745430	26592338	25156792	31281798	13019848	10812497	14261893	0.447683	2.66705e-05	0.00179235	0.458796	0.00170834	0.0108318	4.14164e-06	2.97603e-05
SP_0163	SP_0163	15900101	transcriptional regulator PlcR	Cytoplasmic	288	33.9	6.07	24	71	4	High	0	43.905	148.64			90272.3	54605.4	81284.9	145314	1.13232e+07	2.4883e+07	1.41721e+07	7.34203e+06	6.30525e+06	8.59664e+06	na	na	94506.2	70800.3	82010.3	136825	14593607	14106795	14021310	9144585	5.70898e+06	8.08694e+06	1.02157	na	na	0.536975	0.0106247	0.0349706	4.95741e-07	6.00898e-06
SP_0165	SP_0165	15900103	flavoprotein	Unknown	185	21	6.54	37	84	12	High	0	56.26	202.18	1.00428e+07	3.65318e+06	6.54663e+06	5.13435e+06	9.0655e+06	6.4921e+06	6.49526e+07	1.49088e+08	8.26582e+07	7.78918e+07	9.29078e+07	92277279	7480341	7723778	6973297	7.41234e+06	9182516	6.01146e+06	86291200	79522896	81549048	100292928	82618632	86003752	1.01934	0.969354	0.979433	1.08713	0.275325	0.379056	4.65053e-09	2.08339e-07
SP_0166	SP_0166	15900104	pyridoxal-dependent decarboxylase	Unknown	368	42.7	6.89	34	101	13	High	0	76.363	335.03	1.38773e+06	795660	1.34582e+06	1.1922e+06	2.48796e+06	2.54345e+06	2.87433e+08	6.16811e+08	3.87973e+08	1.87652e+08	2.41538e+08	2.69529e+08	1.07739e+06	1561855	1.42821e+06	1660616	2518382	2.36352e+06	390024704	314051360	382144576	245025168	213905120	250543344	1.6085	0.0511709	0.113865	0.653158	0.00754827	0.0284699	1.36093e-10	2.33303e-08
SP_0167	SP_0167	15900105	hypothetical protein	Cytoplasmic	463	54.8	7.81	55	208	32	High	0	142.262	572.22	9.90339e+06	3.02862e+06	8.44066e+06	4.41928e+06	5.02337e+06	4.25945e+06	2.64464e+08	6.75871e+08	3.71499e+08	2.02181e+08	2.68007e+08	3.23347e+08	7.40688e+06	6.35284e+06	8994521	6363851	5079958	3954006	358296928	343035744	365414784	263535040	236732064	299518240	0.676701	0.0791185	0.159882	0.749742	0.0143128	0.0426115	9.11984e-10	7.817e-08
SP_0168	SP_0168	15900106	macrolide efflux protein	CytoplasmicMembrane	392	44.3	9.03	5	10	2	High	0.002	5.835	19.09							4748764	7.30735e+06	6.83906e+06	3.35246e+06	3269740	6.84984e+06	na	na	na	na	na	na	6.05132e+06	4314255	6757719	4.12835e+06	2.971e+06	6.447e+06	na	na	na	0.791107	0.36491	0.471408	0.36491	0.398446
SP_0173	mutL	15900110	DNA mismatch repair protein	Cytoplasmic	649	73.4	5.58	49	232	28	High	0	175.283	862.68	6.06911e+07	1.88869e+07	4.32346e+07	2.62043e+07	3.88248e+07	4.9329e+07	7.74849e+07	1.84035e+08	1.07503e+08	5.99479e+07	7.83941e+07	7.80664e+07	43954656	43393576	46339388	39355808	39325140	45214748	103170952	97513592	106474944	76837448	69799152	72819144	0.926755	0.198471	0.305299	0.714468	0.000887863	0.00765782	1.0026e-07	1.85095e-06
SP_0179	ruvA	15900116	Holliday junction DNA helicase RuvA	Cytoplasmic	197	21.6	6.8	31	56	7	High	0	25.144	134.93	3.38602e+07	1.04743e+07	2.2708e+07	8.41328e+06	1.21907e+07	1.14877e+07	1.19025e+07	2.4099e+07	1.45426e+07	4.093e+06	5.2858e+06	5.30269e+06	24806886	23414784	24287064	12295562	12354143	10622331	15381049	13668451	14317293	5054294	4.79154e+06	4.99312e+06	0.486452	0.000159678	0.00326639	0.342173	9.35875e-06	0.000844447	3.97118e-09	2.07192e-07
SP_0182	SP_0182	15900119	methylcrotonoyl-CoA carboxylase	Cytoplasmic	343	38.8	4.98	31	85	10	High	0	64.363	235.18	6.0692e+07	1.68766e+07	3.42467e+07	1.27916e+07	2.06078e+07	2.22778e+07	1.60308e+07	4.37029e+07	1.97008e+07	6.67626e+06	9.00272e+06	1.04231e+07	43954656	38587044	36651172	18901942	20868714	20531576	20777034	24297412	19447196	8.31145e+06	8124305	9772421	0.505921	0.000397911	0.00527566	0.406192	0.000514665	0.00580483	3.58696e-07	4.62833e-06
SP_0184	SP_0184	15900121	hypothetical protein	CytoplasmicMembrane	227	25.8	6.95	29	59	5	High	0	41.842	207.21	1.90234e+07	6.3119e+06	1.22115e+07	1.14895e+07	1.44606e+07	1.74392e+07	2.16689e+07	5.65269e+07	3.40446e+07	2.32817e+07	2.74723e+07	3.41931e+07	14049295	13720144	13020720	16938954	14685161	16039547	28314396	31146186	33549664	29498536	24647600	31989206	1.16851	0.0308333	0.0818944	0.926084	0.429441	0.538178	6.00018e-06	3.80963e-05
SP_0185	corA	15900122	magnesium transporter CorA family protein	CytoplasmicMembrane	314	36.4	4.74	22	55	9	High	0	44.062	143.05	2.64058e+07	1.12419e+07	2.05572e+07	1.03744e+07	1.43373e+07	1.4216e+07	1.67731e+07	4.4365e+07	2.811e+07	1.402e+07	2.24527e+07	2.22433e+07	19405838	25055930	22031752	15282053	14482415	13102766	21832704	24673540	27731912	17599336	20192100	20799494	0.644683	0.00729057	0.0306888	0.789229	0.0527954	0.109415	0.00120913	0.002707
SP_0186	uvrA	15900123	excinuclease ABC subunit A	CytoplasmicMembrane	943	104.1	6.4	35	202	28	High	0	132.905	612.41	6.00568e+07	1.80389e+07	4.11818e+07	3.26768e+07	5.04336e+07	5.71374e+07	3.43889e+07	9.28269e+07	5.48827e+07	4.24016e+07	6.02502e+07	5.70035e+07	43527852	41227424	44185656	49379728	51092408	52330888	45212464	50316864	54152884	54128512	53774928	53210280	1.18506	0.00323598	0.0179635	1.07637	0.220691	0.320339	0.00386268	0.00719753
SP_0187	SP_0187	15900124	peptidase M24 family protein	Cytoplasmic	353	39.3	5.02	46	212	16	High	0	111.682	724.2	1.35482e+08	4.62294e+07	9.43589e+07	5.44116e+07	8.68725e+07	9.68012e+07	1.15541e+08	2.3509e+08	1.44463e+08	5.66992e+07	7.86346e+07	7.35778e+07	96360096	110882192	101576000	83150368	88130848	88486792	155407536	123529352	141934880	72677288	69976096	68639344	0.841168	0.0196997	0.0595073	0.502036	0.000572923	0.00597765	1.67781e-05	8.15128e-05
SP_0189	spxA	15900126	transcriptional regulator spx	Cytoplasmic	132	14.9	8.76	42	40	5	High	0	22.792	104.11	6.86496e+06	2.47535e+06	5.08378e+06	3.69617e+06	4.9483e+06	4.93737e+06	5.04794e+06	1.15154e+07	7.10181e+06	6.0698e+06	7.46543e+06	9.0388e+06	5166464	5.14828e+06	5402811	5304683	5009070	4581849	6439727	6.6853e+06	7.01439e+06	7542417	6.75121e+06	8499069	0.947705	0.289942	0.400086	1.13175	0.166077	0.255137	0.000284651	0.000774561
SP_0191	SP_0191	15900128	hypothetical_protein	Unknown	189	21	7.33	55	106	12	High	0	73.689	285.7	1.51626e+07	3.69754e+06	9.91317e+06	1.12528e+07	1.64553e+07	1.87732e+07	1.49884e+07	4.13268e+07	2.13424e+07	2.53355e+07	3.2548e+07	3.49836e+07	11284718	7.83486e+06	10567866	16637385	16712358	17323554	19458708	23006358	21025404	32067344	29097920	32734454	1.70689	0.00841851	0.0334847	1.47896	0.00291397	0.0146699	9.44119e-06	5.34407e-05
SP_0192	SP_0192	15900129	hypothetical protein	Unknown	88	10.2	5.01	80	107	7	High	0	54.991	391.4	8.42365e+07	2.75347e+07	5.16539e+07	2.36248e+07	2.86912e+07	3.60788e+07	5.08712e+07	9.27931e+07	6.99114e+07	2.66126e+07	3.88445e+07	2.9327e+07	60613240	64324412	55496800	35362112	29081694	33158988	67312752	50316864	68935936	33738572	34699084	27422258	0.540932	0.00101214	0.008882	0.513814	0.006213	0.0248995	0.000175989	0.000525341
SP_0197	SP_0197	15900133	dihydrofolate synthetase	Cytoplasmic	416	46.7	5.12	31	36	11	High	0	48.468	80.8	1.2911e+07	3.50751e+06	9.94356e+06	3.65431e+06	4.84017e+06	5.92746e+06	3.45307e+06	6.7122e+06	4.322e+06	2.12053e+06	2.85291e+06	2.75992e+06	9605492	7.41312e+06	10599985	5231302	4897676	5.49516e+06	4.37309e+06	3.97147e+06	4269545	2.596e+06	2591677	2.60673e+06	0.565711	0.00744109	0.0311558	0.617912	7.77304e-05	0.00260508	2.49346e-06	1.99476e-05
SP_0198	pccL	15900134	putatives Lipocalin	Extracellular	152	16.5	4.68	22	19	2	High	0	13.502	62.29	6.1413e+06	1.35087e+06	4.0364e+06	1.74828e+06	2.75293e+06	2.93438e+06	3.77232e+06	7.02633e+06	4.95573e+06	1.33439e+06	1.97202e+06	1880337	4.63346e+06	2.71921e+06	4.2928e+06	2464622	2.78155e+06	2.72451e+06	4.78538e+06	4.15441e+06	4901549	1618100	1.79567e+06	1.77823e+06	0.684445	0.106233	0.198505	0.375109	9.01855e-05	0.00271901	0.000294473	0.000799475
SP_0199	SP_0199	15900135	cardiolipin synthetase	CytoplasmicMembrane	510	58.7	8.79	6	15	3	High	0	12.336	35.39	2.15236e+06	562792	1.22115e+06	387224	1.15639e+06	1.24963e+06	976048	3.16704e+06	1.42686e+06	493992	1278063	1.10307e+06	1.65342e+06	1085861	1.29016e+06	525790	1.17253e+06	1.16718e+06	1.21278e+06	1.92377e+06	1414498	592789	1.16995e+06	1.0426e+06	0.71114	0.254534	0.365951	0.616417	0.112996	0.188272	0.214032	0.244144
SP_0202	SP_0202	15900138	anaerobic ribonucleoside triphosphate reductase (EC:1.17.4.2)	Cytoplasmic	735	83.7	5.87	60	575	55	High	0	317.611	1709.68	3.0722e+08	8.9675e+07	2.00343e+08	1.1254e+08	1.76386e+08	1.84629e+08	2.9633e+08	6.54495e+08	3.72744e+08	1.39515e+08	2.04765e+08	1.93411e+08	215911232	222488320	215850080	175754880	178590256	168578384	402451392	332238560	367381952	181719808	181392896	179323936	0.799272	0.000354545	0.0051037	0.492197	0.000220557	0.00398021	3.47357e-07	4.58053e-06
SP_0203	SP_0203	15900139	hypothetical protein	Extracellular	46	5.4	10.29	30	12	2	High	0.002	5.303	1.67	1.14289e+06	447483	1.00962e+06	3.23858e+06	3.09505e+06	4006902	1.70172e+06	6.28719e+06	3.6093e+06	3.82549e+06	5.38968e+06	4.99722e+06	886774	852320	1.06728e+06	4630511	3.13586e+06	3.72306e+06	2.13097e+06	3.73093e+06	3.56833e+06	4728679	4.88153e+06	4711556	4.09405	0.000450269	0.00560305	1.51871	0.067673	0.13167	2.9582e-05	0.000128153
SP_0204	SP_0204	15900140	acetyltransferase	Cytoplasmic	168	19	5.43	33	34	4	High	0	23.94	99.06	2.30689e+07	6.81465e+06	1.45977e+07	3.15468e+06	5.01626e+06	4.94323e+06	1.89968e+07	56997791	2.45899e+07	5.13904e+06	6.71167e+06	6.87741e+06	17020984	14863450	15593293	4498869	5079958	4581849	24739620	31412482	24280132	6372080	6068496	6475113	0.298259	2.49575e-05	0.00179235	0.235175	7.15774e-05	0.00246942	2.97182e-08	8.29344e-07
SP_0208	rpsJ	15900144	3S ribosomal protein S1	Cytoplasmic	102	11.6	10.05	75	308	13	High	0	72.977	823.86	1.20136e+09	3.96449e+08	9.22638e+08	6.93457e+08	8.54842e+08	8.8651e+08	8.07003e+08	1.75169e+09	1.13162e+09	8.37041e+08	1.1485e+09	1.18927e+09	823483968	1057310016	1002242368	1125446528	868636352	802101184	1114695680	860299072	1112035712	1113778176	1006410560	1097955072	0.969875	0.793511	0.854325	1.04247	0.629614	0.724627	0.560198	0.588135
SP_0209	rplC	15900145	5S ribosomal protein L3	Cytoplasmic	208	22.2	10.14	70	968	19	High	0	217.843	3861.73	7.05626e+08	2.08885e+08	5.10134e+08	5.09696e+08	6.63925e+08	7.8126e+08	5.9993e+08	1.17939e+09	7.93521e+08	7.37232e+08	8.94642e+08	8.784e+08	489133472	540609216	552474752	822219136	674462080	706685184	824908288	587763008	781587712	978976448	784509120	811036608	1.39258	0.00958596	0.0369984	1.1733	0.258092	0.362132	0.00883869	0.0148134
SP_0210	rplD	15900146	5S ribosomal protein L4	Unknown	207	22.1	9.99	50	491	12	High	0	104.438	1903.92	1.30955e+09	4.34186e+08	9.3803e+08	8.54177e+08	1.18486e+09	1.296e+09	9.81913e+08	2.0541e+09	1.23154e+09	1.11138e+09	1.52485e+09	1.42114e+09	897549184	1164046720	1018598976	1393824000	1199118720	1173378048	1360619264	1002469056	1210367360	1482861568	1327840896	1309278592	1.22275	0.0924741	0.180008	1.15294	0.201515	0.299591	0.0741483	0.094057
SP_0211	rplW	15900147	5S ribosomal protein L23	Cytoplasmic	98	10.8	9.52	92	352	14	High	0	108.543	1198.54	1.06957e+09	3.77389e+08	7.31765e+08	6.5728e+08	9.32055e+08	986807594	8.48822e+08	1.80395e+09	9.86911e+08	7.83507e+08	1.16256e+09	1.24993e+09	735787840	1004125824	794113024	1065621952	946926912	892065088	1173646080	884046336	971410752	1042300544	1015104448	1153099392	1.14624	0.253825	0.365834	1.05989	0.526632	0.631843	0.172826	0.201155
SP_0213	rpsS	15900149	3S ribosomal protein S19	Cytoplasmic	93	10.7	9.99	57	224	7	High	0	70.382	689.58	3.70332e+08	1.16821e+08	3.42696e+08	3.10019e+08	4.5685e+08	4.37305e+08	3.30276e+08	7.72953e+08	3.65706e+08	3.26138e+08	5.56596e+08	5.40536e+08	259345328	294051808	370979776	493888896	464065472	396539648	449448992	390507200	360492480	428149664	489717056	500672224	1.4653	0.0345538	0.0889398	1.18167	0.105306	0.178502	0.0124457	0.0199583
SP_0214	rplV	15900150	5S ribosomal protein L22	Cytoplasmic	114	12.2	10.76	69	414	12	High	0	151.113	1698.32	8.08742e+08	2.70262e+08	5.31672e+08	5.25367e+08	6.33966e+08	7.32223e+08	6.00341e+08	1.20311e+09	7.42182e+08	6.61421e+08	8.59026e+08	8.77995e+08	559121408	707324864	576405184	846988352	643965632	662559936	824908288	597392000	730439936	876698176	753148544	811036608	1.16858	0.24948	0.361358	1.13385	0.271151	0.374664	0.156623	0.184444
SP_0215	rpsC	15900151	3S ribosomal protein S3	Cytoplasmic	217	24	9.7	76	817	24	High	0	211.089	2803.15	1.07897e+09	3.97549e+08	7.78753e+08	7.6359e+08	1.01998e+09	1.14886e+09	8.08146e+08	1.75359e+09	9.94491e+08	9.10979e+08	1.23134e+09	1.23654e+09	742540096	1062915648	845308608	1243638400	1036409856	1038608384	1116096768	860299072	978288768	1213672960	1075960832	1143906688	1.25196	0.12754	0.228788	1.16207	0.135213	0.215495	0.111278	0.135567
SP_0216	rplP	15900152	5S ribosomal protein L16	Cytoplasmic	137	15.4	10.65	44	401	7	High	0	84.542	1571.6	3.42012e+08	7.84577e+07	2.17701e+08	2.24928e+08	3.40174e+08	3.77813e+08	2.50754e+08	5.82366e+08	3.31978e+08	3.44583e+08	4.40851e+08	3.77091e+08	240059360	193424480	235356416	355741920	345178688	343245952	340383200	296814784	327029856	453459968	388308704	349382848	1.56116	0.00298469	0.0169328	1.23534	0.0734751	0.138563	0.000448892	0.00114855
SP_0217	rpmC	15900153	5S ribosomal protein L29	Unknown	68	8	9.57	72	318	11	High	0	62.163	675.98	5.86741e+08	2.30379e+08	4.4481e+08	3.90132e+08	5.06956e+08	5.5443e+08	5.04959e+08	1.06253e+09	6.60988e+08	4.44976e+08	6.54101e+08	6.44816e+08	408041568	597763392	481801344	624753472	514880160	502125568	692416384	529884448	650760576	586973632	574410048	596517696	1.10362	0.461585	0.576858	0.938518	0.521954	0.628596	0.232472	0.263425
SP_0218	rpsQ	15900154	3S ribosomal protein S17	Cytoplasmic	86	10	9.92	49	345	8	High	0	77.208	872.01	2.4362e+08	5.6527e+07	1.41575e+08	1.93259e+08	3.21955e+08	3.31225e+08	1.83622e+08	4.60851e+08	2.35891e+08	1.80869e+08	3.38421e+08	2.85262e+08	172315488	136963632	153044352	304034272	326890560	300762592	248305936	236941136	232527408	235778512	298122528	264408000	2.01523	0.000587855	0.00671429	1.1122	0.220933	0.320339	5.23628e-05	0.000206695
SP_0219	rplN	15900155	5S ribosomal protein L14	Cytoplasmic	122	13	10.27	70	345	13	High	0	79.058	873.18	5.73805e+08	1.76476e+08	4.27696e+08	3.2917e+08	5.30082e+08	5.59182e+08	4.05673e+08	9.66365e+08	5.31387e+08	4.47582e+08	6.49319e+08	6.01854e+08	399164960	451387584	463322144	524904608	538254336	506636704	554765120	484392960	522860320	590982976	570047296	556897472	1.19478	0.0217024	0.0626362	1.09981	0.0879684	0.157537	0.00251886	0.00497963
SP_0220	rplX	15900156	5S ribosomal protein L24	Cytoplasmic	101	11	9.91	63	306	9	High	0	95.281	1185.1	5.57036e+08	1.52512e+08	3.59412e+08	3.16716e+08	4.65909e+08	4.79711e+08	4.74886e+08	9.76884e+08	6.12596e+08	4.02068e+08	6.24771e+08	6.67136e+08	387553120	389682272	388356448	505311200	473210688	435359776	650653440	489723488	603537856	529504096	549100288	616783168	1.21302	0.0113949	0.040677	0.972173	0.821387	0.875102	0.00240865	0.00480928
SP_0221	rplE	15900157	5S ribosomal protein L5	Cytoplasmic	180	19.8	9.06	92	1130	22	High	0	209.96	3778.54	2.24649e+09	9.46669e+08	1.77083e+09	1.38933e+09	1.94631e+09	2.08407e+09	1.69609e+09	3.49116e+09	2.10271e+09	1.76939e+09	2.25515e+09	2.17839e+09	1526647296	2640227584	1926957184	2295125760	1982353664	1873100416	2375898112	1676609792	2065623040	2379950080	1969298432	2006691840	1.00931	0.864382	0.910451	1.03887	0.724597	0.795091	0.97589	0.979154
SP_0222	rpsN	15900158	3S ribosomal protein S14	Cytoplasmic	89	10.1	11.22	62	166	10	High	0	53.897	379.37	2.48825e+08	7.93597e+07	1.84951e+08	2.10626e+08	2.94807e+08	3.36364e+08	2.03079e+08	4.36305e+08	2.82805e+08	2.85321e+08	4.04981e+08	3.83356e+08	175782272	195752368	199599072	333097632	299459712	305283296	274370432	224509344	278796736	373604032	356804352	354923424	1.64207	0.000639207	0.00690365	1.39561	0.00916484	0.0318445	3.73027e-05	0.000154356
SP_0224	rpsH	15900160	3S ribosomal protein S8	Cytoplasmic	132	14.7	9.58	73	390	16	High	0	100.552	1305.08	5.88939e+08	1.84366e+08	4.46316e+08	4.06023e+08	6.34128e+08	5.90721e+08	4.97599e+08	9.63669e+08	5.65343e+08	4.56818e+08	6.45404e+08	7.01823e+08	409407616	472944736	482887008	651006464	643965632	535493312	682666368	483423872	556312000	603022528	566556800	649019520	1.34077	0.0235008	0.0663484	1.05585	0.590162	0.690189	0.0480078	0.064581
SP_0225	rplF	15900161	5S ribosomal protein L6	Cytoplasmic	178	19.4	9.52	77	503	14	High	0	128.002	1568.17	1.36624e+09	5.17045e+08	1.06136e+09	8.66289e+08	1.20034e+09	1.30216e+09	1.09358e+09	2.01606e+09	1.3013e+09	1.21078e+09	1.57212e+09	1.51994e+09	937902016	1398754432	1151641856	1413889280	1219462016	1173378048	1512744960	988283712	1279194112	1618387840	1371237248	1401109120	1.09129	0.491388	0.60248	1.1615	0.294138	0.40026	0.382138	0.415368
SP_0226	rplR	15900162	5S ribosomal protein L18	Cytoplasmic	118	12.9	10.4	72	255	13	High	0	88.875	985.66	7.0811e+08	1.89843e+08	5.1415e+08	4.63876e+08	6.03554e+08	7.52317e+08	6.61364e+08	1.20905e+09	8.07226e+08	5.6883e+08	8.16092e+08	7.60849e+08	490492992	489144192	556827712	746380160	613471104	680570880	910164288	602200768	794376384	753103872	715682048	703350464	1.328	0.0164216	0.0527483	0.941647	0.72702	0.79626	0.0177483	0.0274812
SP_0227	rpsE	15900163	3S ribosomal protein S5	Cytoplasmic	164	17	9.52	79	556	15	High	0	126.243	1890.24	1.5836e+09	6.11367e+08	1.24838e+09	1.09086e+09	1.34295e+09	1.45539e+09	1.41506e+09	2.38072e+09	1.67164e+09	1.35209e+09	1.73986e+09	1.63297e+09	1078894592	1666826752	1358962048	1789380608	1361847808	1317046912	1978961152	1158060416	1642955392	1808392704	1518719360	1502102784	1.08858	0.597845	0.696391	1.0103	0.86512	0.910122	0.732197	0.756793
SP_0228	rpmD	15900164	5S ribosomal protein L3	Cytoplasmic	60	6.4	10.17	67	285	5	High	0	31.139	919.82	3.30334e+08	1.01399e+08	2.54917e+08	2.74493e+08	3.75213e+08	3.78782e+08	3.54538e+08	7.21831e+08	3.61902e+08	3.21451e+08	4.62454e+08	4.34364e+08	231785152	251995584	275474624	435252704	380739072	344150112	484052704	365574496	356556064	421492832	406680096	401989472	1.528	0.00748166	0.0311558	1.01988	0.78158	0.844971	0.00227176	0.00456636
SP_0229	rplO	15900165	5S ribosomal protein L15	Unknown	146	15.4	10.29	65	200	10	High	0	59.676	596.61	6.58933e+08	2.60919e+08	4.96296e+08	4.79838e+08	5.99935e+08	7.45138e+08	5.07925e+08	1.1661e+09	7.07414e+08	6.29832e+08	8.82698e+08	8.43907e+08	457138208	682597376	537249472	772739136	609404160	674265152	696596608	582947904	696012480	835019584	774055360	779746560	1.22625	0.190618	0.298485	1.20919	0.0393844	0.0875169	0.0501867	0.0668908
SP_0230	secY	15900166	preprotein translocase subunit SecY	CytoplasmicMembrane	436	47.3	9.69	15	47	9	High	0	23.598	118.8	6.85811e+07	2.38127e+07	4.00491e+07	2.63581e+07	3.92593e+07	4.07025e+07	2.55446e+07	6.04034e+07	3.81685e+07	2.53289e+07	2.92547e+07	5.35314e+07	49565932	55272412	42893592	39663460	39832440	37362412	33357416	33222032	37690712	32067344	26250320	49955316	0.791016	0.0396108	0.0964221	1.03839	0.99134	0.995583	0.142925	0.169477
SP_0231	adk	15900167	adenylate kinase (EC:2.7.4.3)	Cytoplasmic	212	23.7	5.1	81	375	19	High	0	166.025	1327.71	3.37165e+08	1.31174e+08	2.37139e+08	1.52391e+08	2.28139e+08	2.75659e+08	1.61703e+08	4.07244e+08	2.32497e+08	1.47765e+08	1.96344e+08	1.78404e+08	236612528	331090016	255954672	238089088	231401184	251009216	218178944	210057456	228589600	192251504	173478784	165438480	0.874756	0.300459	0.410683	0.80869	0.0134587	0.0414359	0.00467042	0.00840255
SP_0232	infA	15900168	translation initiation factor IF-1	Cytoplasmic	72	8.2	8.5	63	69	3	High	0	30.769	257.43	5.16268e+07	1.62722e+07	3.94608e+07	2.91392e+07	4.1432e+07	4.89561e+07	5.26237e+07	9.08218e+07	6.40401e+07	4.74336e+07	6.03587e+07	5.53898e+07	37474408	37150436	42355308	43821516	41962456	44941048	69596896	49268276	63121540	60605520	53863568	51722420	1.1175	0.0741607	0.151704	0.913207	0.505403	0.611902	0.00339713	0.00646047
SP_0234	rpsM	15900170	3S ribosomal protein S13	Cytoplasmic	121	13.4	10.64	72	673	18	High	0	131.764	1955.14	1.01596e+09	3.50985e+08	6.98036e+08	693121842	1.07355e+09	1.07037e+09	880362563	1.74663e+09	1.0466e+09	7.61646e+08	1.25164e+09	1.23529e+09	702012672	931567744	757083392	1125446528	1087251968	966697344	1217187968	860299072	1033362432	1012653184	1093342848	1143906688	1.32992	0.0393549	0.0964221	1.0447	0.647696	0.737619	0.0485337	0.0650006
SP_0235	SP_0235	15900171	3S ribosomal protein S11	Cytoplasmic	127	13.4	11.43	33	253	5	High	0	53.533	843.34	3.87166e+08	1.4084e+08	2.70601e+08	2.66043e+08	3.85974e+08	4.19219e+08	3.09547e+08	5.99705e+08	3.70176e+08	3.2491e+08	4.64783e+08	5.01582e+08	271041536	357666496	292831360	422245984	391916928	380285344	421792832	305683104	364430720	426818560	409302432	464715040	1.29614	0.0397234	0.0964946	1.19134	0.143288	0.225776	0.0296247	0.042568
SP_0236	rpoA	15900172	DNA-directed RNA polymerase subunit alpha (EC:2.7.7.6)	Cytoplasmic	311	34.2	4.75	77	625	30	High	0	254.32	2218.41	6.58405e+08	2.03748e+08	4.77868e+08	4.00703e+08	5.84038e+08	6.58837e+08	6.03747e+08	1.27383e+09	7.50618e+08	5.36315e+08	7.27224e+08	6.02838e+08	456457120	527044800	517676992	642798656	593142464	596790208	830495488	631043520	739292608	708837760	638095744	557817792	1.22086	0.0182048	0.0570278	0.865469	0.247028	0.348693	0.0124573	0.0199583
SP_0237	rplQ	15900173	5S ribosomal protein L17	Cytoplasmic	128	14.5	9.86	50	259	9	High	0	63.484	877.99	6.9565e+08	2.55456e+08	4.81427e+08	4.95815e+08	6.63353e+08	6.70632e+08	6.2789e+08	1.21931e+09	7.5085e+08	5.87241e+08	8.72086e+08	8.08213e+08	482330624	666137024	520939552	799117760	673442432	607601600	864024960	607013504	739292608	777262592	764472384	746616192	1.24605	0.151034	0.255226	1.0353	0.684926	0.76516	0.0866457	0.108194
SP_0238	SP_0238	15900174	ACT_domain_protein	CytoplasmicMembrane	88	9.7	4.56	63	67	7	High	0	26.803	204.27	9.22546e+07	3.24053e+07	6.69227e+07	4.47048e+07	5.41816e+07	6.34387e+07	4.39382e+07	86528635	6.52576e+07	37176305	4.28606e+07	4.82342e+07	66334460	76404952	71887000	68005248	54947844	58075160	57920672	47011232	64402784	47403804	38341212	45024568	0.843457	0.0850931	0.16874	0.772255	0.0866329	0.156339	0.00552124	0.00974799
SP_0239	SP_0239	15900175	hypothetical protein	Cytoplasmic	445	46.3	4.94	55	305	20	High	0	151.722	1235.67	3.4521e+08	1.21222e+08	2.17569e+08	1.90655e+08	2.10474e+08	2.5735e+08	1.54985e+08	3.66951e+08	2.10389e+08	1.15669e+08	1.67032e+08	1.56175e+08	242126208	304612992	235356416	300810144	213118848	233811552	208606720	190067872	206928688	150174320	147962512	145064768	0.956073	0.7286	0.803666	0.731835	0.000581077	0.00597765	0.00142633	0.00310182
SP_0240	SP_0240	15900176	phosphoglycerate mutase	Cytoplasmic	230	25.7	4.91	25	73	7	High	0	30.153	189.6	1.13152e+08	3.72739e+07	7.48035e+07	3.97655e+07	5.50733e+07	5.73458e+07	6.82114e+07	1.40723e+08	8.66831e+07	4.153e+07	6.98022e+07	5.99219e+07	80915896	88576704	80411344	60383280	55860968	52513288	90607728	75391712	85490272	52963784	62188864	55906804	0.67529	0.00153081	0.0110865	0.680185	0.00587935	0.0244556	0.000178282	0.000527411
SP_0246	SP_0246	15900181	DeoR family transcriptional regulator	Cytoplasmic	248	27.9	7.77	26	18	5	High	0	24.591	56.89	3.67187e+06	614047	2.03573e+06	2.04556e+06	2.86533e+06	3.18475e+06	2.01578e+06	5.73907e+06	2.74972e+06	2.33471e+06	3.83011e+06	4.08428e+06	2.79531e+06	1.18933e+06	2161750	2.89802e+06	2.90302e+06	2.9558e+06	2.53899e+06	3.4151e+06	2.71882e+06	2.8569e+06	3.47628e+06	3.84764e+06	1.42471	0.17758	0.284812	1.17386	0.267757	0.371691	0.104192	0.1285
SP_0247	SP_0247	15900182	transcriptional regulator	Cytoplasmic	326	37.2	6.2	40	71	12	High	0	49.764	146.49	1.93365e+07	6.45883e+06	1.39853e+07	6.21869e+06	9.59271e+06	9.80119e+06	7.1917e+06	1.63907e+07	9.22904e+06	5.16169e+06	8.30465e+06	7.63593e+06	14267109	14062691	14949982	9028617	9709384	9059151	9219804	9421574	9116865	6.3972e+06	7.49629e+06	7187508	0.642266	0.000123025	0.00311842	0.75945	0.00459289	0.0205628	7.72781e-07	8.35438e-06
SP_0250	SP_0250	15900185	PTS system transporter subunit IIC	CytoplasmicMembrane	432	46.5	9.31	3	6	1	High	0.008	3.785	8.33		244123	392734				436709		494206	285190			na	451484	413728	na	na	na	536189	na	489045	339387	na	na	OFF	na	na	0.662068	na	na	0.116051	0.140526
SP_0251	SP_0251	15900186	formate acetyltransferase	Cytoplasmic	812	91.3	5.91	18	67	11	High	0	51.324	173.21	2.30308e+07	7.83768e+06	1.65792e+07	8.99533e+06	1.34178e+07	1.25695e+07	1.22129e+07	3.05197e+07	1.38048e+07	7.81086e+06	1.19324e+07	1.17456e+07	16948610	17231510	17738450	13179395	13570282	11633172	15775002	17162820	13626644	9738552	10722978	10988970	0.739289	0.00344772	0.0184406	0.675418	0.00714551	0.0274809	0.000255647	0.000711779
SP_0252	SP_0252	15900187	fructose-6-phosphate aldolase	Cytoplasmic	222	24.4	6.21	18	19	3	High	0	12.172	48.48	1.32138e+06	393083	1.00944e+06	346273	1.11622e+06	1.07058e+06	1.29729e+06	2.37096e+06	1.00179e+06	724456	600124	593639	1.02408e+06	744585	1.06728e+06	468835	1.13207e+06	999865	1.6227e+06	1.45231e+06	989432	873410	551078	564344	0.917072	0.657482	0.742223	0.489326	0.0277071	0.068857	0.115997	0.140526
SP_0253	gldA	15900188	glycerol dehydrogenase (EC:1.1.1.6)	Cytoplasmic	362	39.1	5.26	15	45	4	High	0	25.607	136.42	7.55746e+06	1.89728e+06	4.30601e+06	1.82538e+06	2.73991e+06	4.06677e+06	3.94502e+06	1.26108e+07	5.64908e+06	2.53419e+06	3.40709e+06	3.76749e+06	5.6837e+06	3.89247e+06	4.58088e+06	2.58003e+06	2.77143e+06	3.77849e+06	5.01755e+06	7302459	5.58286e+06	3.10568e+06	3.09737e+06	3.55638e+06	0.644906	0.0515138	0.11441	0.545132	0.00780023	0.0288925	0.00453599	0.00824725
SP_0254	leuS	15900189	leucyl-tRNA synthetase (EC:6.1.1.4)	Cytoplasmic	833	94.4	5.02	61	482	46	High	0	295.746	1709.8	2.84936e+08	8.04865e+07	1.88061e+08	1.20332e+08	1.63081e+08	2.0164e+08	2.16075e+08	5.42538e+08	3.05112e+08	1.76786e+08	2.28886e+08	2.32637e+08	200707088	198600480	202848064	186909856	165389072	183989648	292227520	277566464	300453632	230495936	202485808	216332672	0.890615	0.0393857	0.0964221	0.746126	0.00262209	0.0140284	1.64464e-05	8.04713e-05
SP_0255	SP_0255	15900190	acetyltransferase	Cytoplasmic	231	27	5.41	25	24	5	High	0	34.271	85.16	1.4809e+07	4.65181e+06	1.05774e+07	5.54931e+06	7.48413e+06	8.65639e+06	90540.4	170171					10993024	9958769	11306707	8.03425e+06	7571665	8.01017e+06	108322	113746	na	na	na	na	0.732089	0.00195362	0.0128696	OFF	na	na	3.58628e-09	2.03419e-07
SP_0259	ruvB	15900193	Holliday junction DNA helicase RuvB (EC:3.1.22.4)	Cytoplasmic	323	36.2	4.89	37	56	8	High	0	43.142	172.94	1.96996e+07	4.72116e+06	1.15723e+07	8.38854e+06	1.23092e+07	1.58982e+07	1.23121e+07	2.84377e+07	1.60173e+07	1.10657e+07	1.69094e+07	1.57842e+07	14557407	10116175	12377835	12265601	12455488	14663281	15906297	16019237	15797223	13908797	15194299	14822658	1.06297	0.596853	0.696391	0.920436	0.0349131	0.0810062	0.0636924	0.0825387
SP_0261	uppS	15900195	undecaprenyl pyrophosphate synthase	Cytoplasmic	252	28.7	6.71	65	113	12	High	0	70.836	403.36	8.24345e+07	2.27002e+07	5.4491e+07	3.35985e+07	5.80846e+07	6.24167e+07	3.58057e+07	9.83237e+07	4.87958e+07	4.67868e+07	6.25606e+07	6.03999e+07	59340500	52594128	58514552	50771536	58904860	57163424	47082156	53196784	48140316	59827816	55812720	56371800	0.978824	0.729228	0.803666	1.15896	0.0266797	0.0672247	0.0701285	0.0896212
SP_0263	SP_0263	15900197	eep protein	CytoplasmicMembrane	419	45.9	6.57	46	157	20	High	0	98.567	500.48	9.082e+07	2.75136e+07	5.8078e+07	2.98584e+07	4.44036e+07	4.97122e+07	4.09783e+07	1.03538e+08	6.05632e+07	3.75426e+07	5.21051e+07	5.6892e+07	65275640	64324412	62395960	45055228	45005684	45579804	54036236	56175692	59770892	47791416	46505652	53117412	0.706477	1.51949e-05	0.00161066	0.867232	0.0458617	0.0981674	5.96083e-05	0.000227079
SP_0264	proS	15900198	prolyl-tRNA synthetase (EC:6.1.1.15)	Cytoplasmic	617	68.6	5.07	80	819	42	High	0	344.683	2926.73	9.98295e+08	3.01194e+08	6.98116e+08	4.48635e+08	6.48612e+08	7.26588e+08	6.18873e+08	1.42653e+09	7.92336e+08	5.48745e+08	7.32521e+08	7.01264e+08	687137664	792797568	757083392	721685376	659211904	658054848	851450816	707736576	779621568	726270336	643328192	648099520	0.91146	0.152058	0.256584	0.862703	0.0916843	0.161723	0.10461	0.128751
SP_0265	SP_0265	15900199	glycosyl hydrolase	Cytoplasmic	459	53.1	5.29	7	5	2	High	0	11.88	12.83	757557	283114	438632	190143	404180	398835	392114	1.01299e+06	581848	272749	267650	386798	593977	527514	462358	253803	408033	374647	480153	636781	576090	324903	247420	368287	0.654408	0.0544748	0.118503	0.555579	0.0143753	0.0426892	0.00953224	0.015865
SP_0266	glmS	15900200	glucosamine--fructose-6-phosphate aminotransferase (EC:2.6.1.16)	Cytoplasmic	602	65.6	5.15	69	569	36	High	0	293.613	1982.39	2.9081e+08	9.35763e+07	2.16238e+08	2.13314e+08	2.83547e+08	3.40865e+08	2.4071e+08	4.8864e+08	3.23216e+08	1.98394e+08	2.6199e+08	2.35603e+08	204855728	232652544	233189584	336330176	288286048	309803264	326612896	250838400	318171104	258244560	231465216	219107008	1.3932	0.00582305	0.0265222	0.791424	0.0769574	0.142834	0.00797497	0.013536
SP_0267	SP_0267	15900201	hypothetical protein	Cytoplasmic	349	38.9	5.69	58	67	14	High	0	62.151	191.76	3.29494e+07	1.00666e+07	1.91809e+07	1.03917e+07	1.06614e+07	1.54917e+07	1.94485e+07	4.07025e+07	2.43427e+07	7.02299e+06	7.03447e+06	8.75985e+06	24088048	22479448	20528712	15282053	10834078	14296196	25268768	22683150	23984306	8740503	6356009	8236829	0.602304	0.0109769	0.0399123	0.324361	0.000381555	0.00506064	2.04653e-05	9.5558e-05
SP_0268	spuA	15900202	alkaline amylopullulanase	Cellwall	1280	142.5	5.69	32	121	29	High	0	133.906	302.46	1.56084e+07	4.03383e+06	9.56282e+06	9.99099e+06	1.65557e+07	1.90942e+07	1.06493e+07	2.70441e+07	1.62169e+07	1.88205e+07	2.76774e+07	2.68116e+07	11576256	8569891	10193183	14665535	16813752	17598640	13675807	15255263	15994509	23730484	24825714	25091058	1.61763	0.00919189	0.0357258	1.63932	0.000553854	0.00596028	3.25743e-05	0.000137638
SP_0271	rpsL	15900205	3S ribosomal protein S12	Cytoplasmic	137	15.1	11.53	58	246	12	High	0	88.528	782.25	3.95434e+08	1.1209e+08	2.77976e+08	2.84377e+08	4.05072e+08	4.50428e+08	2.88611e+08	6.93081e+08	4.0695e+08	3.36148e+08	5.10387e+08	4.70769e+08	276543168	280876800	300425280	451524384	411223168	408278208	392784512	351371744	400842656	441469120	448646304	436124320	1.48165	0.000676459	0.00702435	1.15829	0.0236503	0.0619236	2.39945e-05	0.000107438
SP_0272	rpsG	15900206	3S ribosomal protein S7	Cytoplasmic	156	17.7	10.51	65	320	13	High	0	106.634	1138.87	9.33751e+08	2.89782e+08	5.78407e+08	4.74179e+08	7.00037e+08	7.74475e+08	3.50181e+08	7.34613e+08	4.62869e+08	4.74549e+08	5.28328e+08	5.36294e+08	643841216	762417088	626451392	762852480	711056192	700382080	477128768	371935776	455951232	627110720	464378400	496064928	1.06965	0.351085	0.465717	1.2165	0.179937	0.272343	0.00245766	0.004899
SP_0275	SP_0275	15900209	hypothetical protein	Unknown	87	10	4.77	14	2	1	High	0.008	3.757	5.21		34607.7					149771	624322	289465	461849	651876	765523	na	58109.5	na	na	na	na	180973	399789	286219	553872	598520	727044	na	na	na	2.16779	0.0283353	0.0697297	0.0283354	0.0409668
SP_0278	pepS	15900212	aminopeptidase	Cytoplasmic	413	45.2	4.92	74	438	30	High	0	233.548	1650.22	348379756	1.16308e+08	2.34799e+08	1.35995e+08	2.03345e+08	2.15588e+08	1.69658e+08	4.05811e+08	2.27046e+08	1.28531e+08	1.7446e+08	1.62372e+08	244193680	291414976	253785952	212463264	206009664	196677888	229127840	209558960	223666912	167251344	154123920	150622160	0.779269	0.0132044	0.0451505	0.712606	0.00121895	0.0088809	5.668e-05	0.000219407
SP_0280	SP_0280	15900214	ribosomal small subunit pseudouridine synthase A	Cytoplasmic	240	27.3	6.43	10	19	2	High	0.002	9.015	60.88	3.15838e+06	998220	2.5102e+06	1.70052e+06	2.05751e+06	2.34281e+06	1.94622e+06	4.23451e+06	2.76547e+06	2.14984e+06	2.9811e+06	2.60639e+06	2.41335e+06	1.9803e+06	2.662e+06	2392547	2.08317e+06	2.17829e+06	2.44964e+06	2.54247e+06	2738582	2.63325e+06	2.70912e+06	2.4656e+06	0.943075	0.611594	0.704658	1.01	0.823398	0.876333	0.167705	0.195955
SP_0281	pepC	15900215	aminopeptidase	Cytoplasmic	444	50.2	5.21	68	496	32	High	0	236.872	1718.76	7.79558e+08	2.49279e+08	5.25898e+08	3.35742e+08	4.75011e+08	5.68977e+08	4.17901e+08	8.60077e+08	5.5011e+08	3.12995e+08	4.24615e+08	3.85707e+08	539431680	649698304	569877056	536340608	482358176	515656352	571424640	432914496	541556224	410844064	374309408	357691616	0.872285	0.10064	0.191429	0.739277	0.0346097	0.0808708	0.00410341	0.00752919
SP_0282	manN	15900216	PTS system mannose-specific transporter subunit IID	CytoplasmicMembrane	303	33.8	8.76	44	460	15	High	0	125.93	1527.3	1.0202e+09	3.17241e+08	6.66528e+08	5.79534e+08	8.16705e+08	9.14524e+08	5.0524e+08	1.17101e+09	6.9359e+08	6.90435e+08	9.14016e+08	9.84797e+08	702012672	837090496	723325888	937943232	829999552	827293760	692416384	582947904	683219712	915707392	801053888	909475008	1.1471	0.112397	0.206711	1.34089	0.013843	0.0420669	0.00873469	0.0146801
SP_0283	SP_0283	15900217	PTS system mannose-specific transporter subunit IIC	CytoplasmicMembrane	267	27.2	5.05	22	105	6	High	0	31.119	348.74	1.03565e+08	4.38947e+07	8.84521e+07	6.95254e+07	8.10072e+07	9.32161e+07	7.03439e+07	1.18167e+08	9.14937e+07	6.41078e+07	77046806	9.95276e+07	74582560	105096056	95203088	106852280	82142864	85211576	93442376	63469920	90219584	82302928	68560560	92685936	0.997544	0.995696	0.997679	0.985504	0.962362	0.975671	0.729884	0.755602
SP_0284	manL	15900218	PTS system mannose-specific transporter subunit IIAB	Cytoplasmic	329	35.4	5.29	82	936	31	High	0	261.509	2956.81	1.47227e+09	5.01018e+08	1.11995e+09	9.26066e+08	1.30735e+09	1.43933e+09	1.03435e+09	2.23287e+09	1.27716e+09	9.90833e+08	1.49222e+09	1.37634e+09	1005083264	1353351424	1217097088	1514253824	1331329920	1299088896	1428196736	1087431040	1259529344	1321804416	1301804672	1272534528	1.15918	0.198076	0.305094	1.03205	0.661074	0.746333	0.432336	0.46198
SP_0286	SP_0286	15900220	Cof family protein	Cytoplasmic	270	30.8	5.33	57	154	11	High	0	80.698	544.58	7.10606e+07	2.49488e+07	5.17603e+07	2.50265e+07	4.3721e+07	4.73116e+07	3.96413e+07	1.06183e+08	6.22013e+07	4.12523e+07	5.62728e+07	5.17955e+07	51339100	57956680	55604512	37511372	44295580	43389380	52162408	57219688	61347716	52705060	50229760	48373976	0.759224	0.0119047	0.0421912	0.886247	0.0883077	0.157904	0.00296307	0.00572573
SP_0287	SP_0287	15900221	xanthine/uracil permease	CytoplasmicMembrane	472	49.2	5.44	19	96	7	High	0	58.657	348.88	9.67589e+07	3.4197e+07	6.17292e+07	5.33063e+07	6.94763e+07	8.67874e+07	5.18053e+07	1.26443e+08	7.91354e+07	7.35915e+07	7.59455e+07	9.68766e+07	69508840	80866424	66277820	81429424	70472256	79387768	68521952	67624768	78001888	94682504	67587576	90273184	1.06756	0.420117	0.534778	1.17929	0.244804	0.346387	0.399014	0.431756
SP_0288	SP_0288	15900222	hypothetical protein	CytoplasmicMembrane	235	25.8	9.72	4	9	1	High	0.008	3.846	29.68	4439416	2.48879e+06	4786880	4.02373e+06	5.34345e+06	6998520	4461157	11209265	6.33876e+06	6964003	8.30281e+06	7.66585e+06	3.3702e+06	5.17007e+06	5.09319e+06	5.77485e+06	5404027	6.48145e+06	5.67623e+06	6.51664e+06	6.26409e+06	8664779	7.49629e+06	7.2156e+06	1.29537	0.140966	0.242941	1.26655	0.0274873	0.0684557	0.00999815	0.0165259
SP_0289	SP_0289	15900223	dihydropteroate synthase	Cytoplasmic	324	35.5	5.21	31	95	13	High	0	60.337	311.17	4.36334e+07	1.3341e+07	3.12979e+07	1.59352e+07	2.9172e+07	2.73487e+07	2.19572e+07	5.43603e+07	2.96206e+07	1.76139e+07	2.62339e+07	2.39664e+07	31760744	30008572	33531362	23601344	29588810	25110128	28712074	30026436	29211044	22195374	23489766	22479226	0.821613	0.0552752	0.119602	0.775039	0.000292605	0.00436583	0.00146704	0.0031777
SP_0290	SP_0290	15900224	dihydrofolate synthetase	Cytoplasmic	440	49	5.06	31	93	12	High	0	53.888	260.89	2.00686e+07	6.04181e+06	1.36876e+07	1.09214e+07	1.61171e+07	1.73171e+07	1.24764e+07	3.16795e+07	1.64134e+07	1.26102e+07	1.99596e+07	1.83407e+07	14847612	13104607	14628370	16034704	16306916	15947829	16169048	17815136	16191823	15816209	17962070	17158316	1.13407	0.0333224	0.0867275	1.01516	0.779543	0.843788	0.0145967	0.0230474
SP_0291	folE	15900225	GTP cyclohydrolase I (EC:3.5.4.16)	Cytoplasmic	184	20.7	5.82	67	226	12	High	0	90.318	720.78	1.50068e+08	3.50826e+07	9.32014e+07	5.75562e+07	7.79546e+07	8.88236e+07	1.20223e+08	262725028	1.53283e+08	7.50486e+07	1.0274e+08	9.90476e+07	106863544	83101264	100279712	88161528	79098120	81208000	160852768	137730000	150799216	96508432	91540576	92221832	0.856063	0.140512	0.242852	0.623681	0.00060523	0.0060164	0.000111557	0.000364763
SP_0292	SP_0292	15900226	bifunctional folate synthesis protein	Cytoplasmic	270	31.1	5.21	22	39	6	High	0	29.184	110.82	1.02519e+07	3.59929e+06	7.43511e+06	3.49169e+06	3.96677e+06	5.03949e+06	1.15039e+07	1.9983e+07	16014020	6.64423e+06	8.20617e+06	9.39981e+06	7.70065e+06	7.61274e+06	7.92483e+06	4.99665e+06	4.01668e+06	4.67414e+06	14856026	11413900	15797223	8.26097e+06	7.41553e+06	8836213	0.589007	0.0012516	0.0097291	0.582705	0.00890953	0.031384	1.64966e-05	8.04713e-05
SP_0294	rplM	15900228	5S ribosomal protein L13	Unknown	148	16.1	9.95	78	675	12	High	0	120.257	1998.99	1.02309e+09	3.30755e+08	7.65222e+08	6.48831e+08	9.31121e+08	1.02559e+09	9.50387e+08	2.15425e+09	1.18093e+09	8.77319e+08	1.23426e+09	1.15958e+09	702012672	875936192	830057920	1052341568	945910656	930733504	1315598720	1049703552	1161200128	1167759104	1075960832	1070380416	1.21635	0.0612361	0.129494	0.93977	0.45598	0.562423	0.00394058	0.00729737
SP_0295	rpsI	15900229	3S ribosomal protein S9	Cytoplasmic	130	14.2	10.86	42	261	8	High	0	55.616	709.72	4.67376e+08	1.70286e+08	3.14954e+08	2.99774e+08	4.01584e+08	4.29307e+08	3.99602e+08	8.60587e+08	5.51075e+08	4.89902e+08	5.7237e+08	5.97746e+08	325965888	435248896	340579104	477583680	408174208	389317056	546440768	433401504	542539392	647195008	502819616	553210432	1.15727	0.239952	0.352816	1.11879	0.34805	0.455142	0.0157322	0.0245815
SP_0298	SP_0298	15900232	hypothetical protein	Cytoplasmic	402	47.1	5.77	14	19	4	High	0	16.426	51.63							1916112	5.19278e+06	2.62535e+06	1.95599e+06	2.77811e+06	2.48094e+06	na	na	na	na	na	na	2.41136e+06	3098264	2.60027e+06	2.39746e+06	2.52843e+06	2343253	na	na	na	0.89633	0.249776	0.351303	0.249777	0.281704
SP_0312	SP_0312	15900245	glycosyl hydrolase	Cytoplasmic	737	86	5.52	34	75	22	High	0	88.97	211.25	5.91239e+06	2.07783e+06	4.18491e+06	2.56365e+06	3.37369e+06	4.3173e+06	3.66465e+07	9.12264e+07	4.93793e+07	3.15154e+07	4.12984e+07	4.14514e+07	4462964	4.2804e+06	4442153	3.6382e+06	3.40921e+06	4.00943e+06	48150836	49478064	48731680	40047620	36920204	38788344	0.838559	0.021966	0.0630598	0.790897	0.000704613	0.00657087	3.06988e-12	3.68386e-09
SP_0319	rpiB	15900251	ribose 5 phosphate isomerase	Cytoplasmic	213	23.7	5.05	8	7	2	High	0.002	6.229	14.1	1.5544e+06	711583	1.59443e+06	1.8698e+06	1.92154e+06	2.23748e+06	1.46243e+06	2.51269e+06	1.97625e+06	2.06085e+06	2.55829e+06	1.75015e+06	1199049	1.38933e+06	1.68322e+06	2.63779e+06	1.9415e+06	2.08564e+06	1.82574e+06	1.53515e+06	1.95805e+06	2.52152e+06	2.32956e+06	1655724	1.56029	0.0298316	0.0805176	1.22333	0.266788	0.371225	0.0459725	0.0622652
SP_0330	SP_0330	15900262	sugar binding transcriptional regulator RegR	Cytoplasmic	333	38.3	5.5	22	30	6	High	0	28.678	77.68	1.07754e+07	3.39816e+06	7.26699e+06	4.58997e+06	6.94604e+06	7.15639e+06	7.85843e+06	1.32011e+07	8.59049e+06	4.40507e+06	8.27106e+06	5.95414e+06	8.06758e+06	7169467	7.74304e+06	6614551	7034756	6.62887e+06	10093076	7.63835e+06	8485195	5.45546e+06	7469368	5602995	0.882424	0.036083	0.0918619	0.70672	0.0533302	0.110329	0.0297668	0.0426764
SP_0332	gpsB	15900263	hypothetical protein	CytoplasmicMembrane	180	20.6	9.16	17	22	2	High	0	18.64	61.1		34232		73283	143025		6.77088e+06	1.62153e+07	8.61985e+06	1.43847e+06	2.72298e+06	2.57583e+06	na	57404.5	na	95717.8	144312	na	8673003	9310483	8514798	1.75386e+06	2.4742e+06	2437359	2.09069	na	na	0.251542	0.000272527	0.00420624	4.43368e-06	3.12966e-05
SP_0333	SP_0333	15900264	transcriptional regulator	Cytoplasmic	64	7.5	4.84	17	6	1	High	0.007	4.036	11.34	2.18879e+06	712415	412969	278974	493052	482892	1.91013e+06	5454606	2.54294e+06	978356	656782	1.52166e+06	1.68363e+06	1.38933e+06	434868	376115	497998	453097	2.3986e+06	3.24817e+06	2.51136e+06	1.18478e+06	603081	1.4389e+06	0.378358	0.127021	0.228559	0.395526	0.0247042	0.0641106	0.00761987	0.0130254
SP_0334	mraW	15900265	S-adenosyl-methyltransferase MraW	Cytoplasmic	316	36	6.76	46	125	13	High	0	67.488	342.59	3.05885e+07	8.61783e+06	2.11594e+07	1.80573e+07	2.74701e+07	2.92001e+07	1.95574e+07	4.49501e+07	2.66584e+07	2.52757e+07	3.45936e+07	3.2498e+07	22433366	19035212	22676028	26950054	27864832	26848986	25533324	24995754	26351246	32067344	30965704	30404998	1.27312	0.0134112	0.0457237	1.21537	0.000877112	0.00762113	0.000180023	0.00053078
SP_0335	ftsL	15900266	cell division protein FtsL	Cytoplasmic	105	12.2	6.11	60	30	6	High	0	29.468	90.68	2.42527e+06	827429	2.23994e+06	3.24887e+06	2.90885e+06	4.62092e+06	2.39019e+06	5.42631e+06	2.91786e+06	6.24253e+06	6.40206e+06	9.00533e+06	1.86464e+06	1.62576e+06	2.37457e+06	4.64514e+06	2943522	4.28645e+06	3.01201e+06	3.23665e+06	2.88676e+06	7756633	5.78989e+06	8470990	2.02475	0.0174599	0.0552962	2.41012	0.00192337	0.011722	0.000172305	0.000519513
SP_0336	pbpX,ftsI	15900267	penicillin-binding protein 2X	CytoplasmicMembrane	750	82.3	5.83	64	264	35	High	0	171.821	754.55	7.74256e+07	2.66709e+07	5.02398e+07	5.22671e+07	7.73514e+07	8.6311e+07	3.11074e+07	8.61749e+07	4.18668e+07	5.39657e+07	7.61366e+07	7.80988e+07	55802792	62361784	53880248	79865816	78489424	78932680	40810340	46853500	41338432	69169528	67764424	72819144	1.37922	0.00188065	0.0128236	1.62596	0.000571223	0.00597765	5.76369e-06	3.71193e-05
SP_0337	mraY	15900268	phospho-N-acetylmuramoyl-pentapeptide-transferase (EC:2.7.8.13)	CytoplasmicMembrane	326	36.1	8.29	6	18	2	High	0	12.607	55.31	3.77131e+06	843880	2.45683e+06	2.38501e+06	2.8067e+06	3.38356e+06	2.78339e+06	5.9582e+06	4.42577e+06	2.95758e+06	3.29549e+06	4.09376e+06	2.87008e+06	1660853	2.60876e+06	3.39105e+06	2.84229e+06	3.14077e+06	3.51186e+06	3.54155e+06	4.37817e+06	3.64146e+06	2.99808e+06	3.85704e+06	1.31296	0.167768	0.274872	0.918209	0.460002	0.56504	0.0420386	0.0575871
SP_0338	SP_0338	15900269	ATP-dependent Clp protease ATP-binding subunit	Cytoplasmic	701	77.6	5.08	11	39	5	High	0	32.807	102.47	3.22638e+06	1.38562e+06	2.58187e+06	571809	2.00561e+06	873637	853994	1.75621e+06	1.40226e+06	465239	749023	799385	2.46584e+06	2803829	2736538	784403	2.03257e+06	817520	1.05896e+06	1.08926e+06	1.38485e+06	557520	686954	758243	0.45396	0.0465291	0.105756	0.566849	0.0102594	0.0343835	0.00268534	0.00524304
SP_0340	luxS	15900270	S-ribosylhomocysteinase	Cytoplasmic	160	17.9	5.54	57	86	6	High	0	44.754	314.37	5.45148e+07	1.6473e+07	3.70603e+07	2.81423e+07	3.67246e+07	4.75375e+07	29724262	7.0019e+07	3.59479e+07	2.7096e+07	3.66646e+07	3.57011e+07	39541536	37629020	39771824	42280360	37195212	43571892	38944916	38313272	35423004	34381624	32832794	33386656	1.05221	0.397167	0.510581	0.892794	0.0248896	0.0643071	0.00932366	0.0155827
SP_0341	SP_0341	15900271	hypothetical_protein	Cytoplasmic	494	55	5.76	47	297	27	High	0	178.465	942.46	1.32417e+08	4.46869e+07	9.43515e+07	8.27493e+07	1.12483e+08	1.33131e+08	7.99043e+07	1.78485e+08	1.07038e+08	9.87333e+07	1.43554e+08	1.34104e+08	94256920	107106936	101576000	127674704	113608384	121389152	106417208	94438208	105489584	127490912	127704984	124680216	1.19718	0.0229224	0.0650305	1.24003	0.00524597	0.0223975	0.00176743	0.00374059
SP_0342	dexB	15900272	glucan 1,6-alpha-glucosidase	Cytoplasmic	535	62	4.73	36	158	18	High	0	106.824	484.91	4.93921e+07	1.72403e+07	3.373e+07	2.16954e+07	3.11207e+07	3.54771e+07	3.46106e+07	9.0615e+07	5.0079e+07	3.66755e+07	4.55632e+07	4.48266e+07	35904872	39306320	36113108	32450144	31515568	32610622	45479476	49163336	49421652	46757912	40738264	41860392	0.867522	0.0104957	0.0387277	0.897908	0.0951774	0.164592	5.98387e-05	0.000227236
SP_0346	cps4A,wzg	15900275	capsular polysaccharide biosynthesis protein Cps4A	CytoplasmicMembrane	481	53.5	8.68	27	132	13	High	0	58.345	315.53	4.09302e+07	1.22632e+07	2.79514e+07	2.49323e+07	3.67119e+07	4.00392e+07	2.37374e+07	5.78201e+07	3.33265e+07	3.80624e+07	5.23698e+07	5.38458e+07	29828166	27644936	29982818	37357776	37195212	36722912	30966996	31838674	32859516	48566840	46771672	50234392	1.27237	0.000832237	0.00808657	1.52169	9.73558e-05	0.00271901	3.08009e-07	4.34426e-06
SP_0347	cpsB,wzh	15900276	capsular polysaccharide biosynthesis protein Cps4B	Cytoplasmic	243	28.1	6.62	27	17	7	High	0	27.133	41.84	1.19914e+06	432762	733824	848549	1.54626e+06	1.35058e+06	8.66446e+06	1.47887e+07	1.20803e+07	1.02479e+07	9.97104e+06	9.2505e+06	932584	824323	774640	1.17527e+06	1567094	1.26008e+06	11137366	8531577	11949196	12766012	8994038	8695725	1.58103	0.0114372	0.040677	0.963237	0.802047	0.86101	8.24107e-08	1.70417e-06
SP_0348	cpsC,wzd	15900277	capsular polysaccharide biosynthesis protein Cps4C	Unknown	230	25.4	9.04	35	81	10	High	0	72.109	294.53	1.33506e+08	3.62618e+07	8.72551e+07	8.07988e+07	1.20469e+08	1.39308e+08	4.58988e+07	9.63527e+07	5.98986e+07	6.84102e+07	9.0993e+07	8.89807e+07	95659192	86085848	93907256	124672272	121730296	126838608	60601860	52202456	59080780	87903168	80939800	82940288	1.35403	0.000928157	0.00855773	1.46483	0.00183013	0.0113274	9.29317e-07	9.45068e-06
SP_0349	cpsD,wze	15900278	capsular polysaccharide biosynthesis protein Cps4D	CytoplasmicMembrane	227	24.9	8.85	20	45	6	High	0	24.304	117.99	1.86528e+08	5.5263e+07	1.282e+08	7.54665e+07	1.22178e+08	1.25537e+08	2.52649e+07	5.22008e+07	3.29815e+07	2.93759e+07	3.90782e+07	3.26226e+07	132695192	133911744	137898256	116306560	123760416	115030992	33091704	28851846	32563714	37341908	34965764	30498180	0.877858	0.00691889	0.0297691	1.08781	0.3255	0.436856	4.64146e-09	2.08339e-07
SP_0357	cps4I,wchI,	15900286	UDP-N-acetylglucosamine-2-epimerase	Cytoplasmic	365	41.3	5.27	2	30	2	High	0	11.738	69.7	6.51266e+07	2.03308e+07	4.53632e+07	3.79441e+07	6.49658e+07	6.73707e+07	436232	1.42701e+06	611637	35099.4		67337.4	47081380	46773472	48708836	57433628	65906136	61720792	534942	891180	605761	40598.5	na	64478.7	1.29809	0.0033889	0.0183406	0.0775713	0.00230214	0.0128591	3.14734e-09	1.98779e-07
SP_0366	SP_0366	15900290	oligopeptide ABC transporter oligopeptide-binding protein AliA	Cellwall	660	73	5.16	74	1177	62	High	0	558.562	4204.82	9.70307e+08	3.10748e+08	6.30063e+08	8.69142e+08	1.17698e+09	1.37548e+09	6.62485e+08	1.44364e+09	8.52181e+08	1.42181e+09	1.90734e+09	1.95584e+09	668202752	820467840	683044224	1418896896	1199118720	1245223424	911562432	712519168	838637824	1903506560	1666109440	1804921344	1.77889	0.00220672	0.0138335	2.18236	0.000669839	0.00644034	1.39392e-05	7.11787e-05
SP_0368	SP_0368	118090040	cell wall surface anchor family protein	Cellwall	1767	195.9	6.07	16	95	21	High	0	80.543	239.99	1.14099e+07	4.48931e+06	8.2138e+06	8.75661e+06	1.3642e+07	1.42302e+07	7.78673e+06	1.81935e+07	1.13621e+07	1.14417e+07	1.60554e+07	1.69906e+07	8507490	9599419	8748462	12819668	13772985	13102766	10001812	10419390	11258444	14289998	14479553	15943890	1.47812	0.000751197	0.00741834	1.41142	0.00214561	0.0122175	1.6041e-05	7.88901e-05
SP_0369	ponA,pbp1A	15900292	penicillin-binding protein 1A	Extracellular	719	79.7	5.6	51	369	36	High	0	233.792	1276.2	1.46442e+08	5.24422e+07	9.81088e+07	1.11787e+08	1.70157e+08	1.81564e+08	7.27681e+07	1.82021e+08	9.44153e+07	1.3316e+08	1.96593e+08	1.90707e+08	104064704	126550656	105573704	174162016	172496832	165857872	96818656	96489040	93076416	172510096	174358320	177473328	1.52449	0.00276721	0.0159731	1.8309	2.30817e-06	0.000492095	2.18164e-06	1.80549e-05
SP_0370	recU	15900293	Holliday junction-specific endonuclease	Cytoplasmic	198	23.1	9.48	10	2	1	High	0.002	4.946	6.48							282661	1514804	673534	718463	873720	1.27581e+06	na	na	na	na	na	na	344867	939329	667080	866075	800809	1.21251e+06	na	na	na	1.47564	0.230357	0.330802	0.230357	0.261274
SP_0372	gpsB	15900295	conserved hypothetical protein	Cytoplasmic	109	12.6	4.83	25	89	4	High	0	26.26	264.99	8.50248e+07	2.93489e+07	5.63373e+07	3.01094e+07	4.63802e+07	4.75513e+07	5.18797e+07	1.34955e+08	6.80257e+07	3.21345e+07	4.54275e+07	4.80056e+07	61178748	68750744	60454988	45363776	47034620	43663168	68656224	72288440	67063556	40821096	40560852	44838484	0.714667	0.00194335	0.0128696	0.606805	0.000218758	0.00398021	5.66322e-06	3.69341e-05
SP_0373	SP_0373	15900296	hypothetical protein	Cytoplasmic	385	43.2	9.01	42	102	15	High	0	64.752	332.91	4.36365e+07	1.34762e+07	2.93925e+07	2.16514e+07	2.94276e+07	3.16854e+07	2.98856e+07	6.80641e+07	4.00796e+07	2.98179e+07	3.91864e+07	3.76183e+07	31760744	30482412	31488072	32450144	29791606	29135964	39211360	37307648	39563812	37857108	35054520	35156432	0.974891	0.494827	0.604788	0.930957	0.0819858	0.149797	0.000241146	0.000685722
SP_0374	mapZ	15900297	Mid-cell-anchor protein	Cytoplasmic	464	51.5	4.78	36	112	12	High	0	73.919	402.39	3.28511e+07	8.66417e+06	2.50588e+07	1.86423e+07	2.92376e+07	3.37049e+07	2.12838e+07	5.19498e+07	2.99727e+07	2.45153e+07	3.09981e+07	3.04467e+07	24088048	19127960	26865766	27712554	29588810	30964956	27784332	28691496	29605578	31039400	27763322	28447702	1.25948	0.0850935	0.16874	1.01358	0.758637	0.824727	0.047587	0.0641622
SP_0375	gnd	15900298	6-phosphogluconate dehydrogenase (EC:1.1.1.44)	Cytoplasmic	474	52.5	5.06	76	823	34	High	0	310.707	3244.15	1.27852e+09	4.15487e+08	9.04458e+08	5.85253e+08	8.37081e+08	9.58439e+08	9.6233e+08	1.97981e+09	1.21073e+09	6.75975e+08	8.95505e+08	9.23624e+08	877360704	1110617856	981529408	946222272	850337216	865975744	1332479360	969360832	1190698624	896869440	785379584	853361920	0.896625	0.235364	0.34871	0.726008	0.0360658	0.0821459	0.0333199	0.0472622
SP_0376	rr14	15900299	DNA-binding response regulator ritR	Cytoplasmic	229	26.9	7.05	38	51	9	High	0	35.932	142.58	1.3277e+07	5.05778e+06	8.40351e+06	6.15813e+06	8.47608e+06	1.17209e+07	8.51481e+06	2.24154e+07	1.27356e+07	6.93151e+06	8.93215e+06	9.42914e+06	9897888	10882397	8951714	8939456	8584752	10806148	10941462	12735325	12541268	8626912	8.06151e+06	8864296	0.952857	0.608774	0.70281	0.705524	0.00341549	0.0162636	0.0102214	0.0167794
SP_0377	cbpC	15900300	choline binding protein C	Extracellular	340	39.5	7.47	24	29	6	High	0	28.969	89.92	9.51984e+06	2.59596e+06	5.50574e+06	4.49426e+06	9.18182e+06	9.5958e+06	903573	3.7989e+06	1.04899e+06	943536	1.82923e+06	1.75705e+06	7127594	5410053	5862040	6.46703e+06	9293937	8875154	1.12196e+06	2.2922e+06	1038865	1.14302e+06	1.66885e+06	1.66515e+06	1.33894	0.111021	0.205151	1.00539	0.847735	0.895849	6.14662e-05	0.00023268
SP_0378	cbpJ	15900301	choline binding protein J	Unknown	332	38.9	5.59	11	7	1	High	0	9.964	23.11	575532		325416	294385	606839	629829							453598	na	341881	396832	613252	590230	na	na	na	na	na	na	1.34117	0.264518	0.376591	na	na	na	0.264518	0.294454
SP_0381	SP_0381	15900304	mevalonate kinase	Cytoplasmic	292	31.5	5.02	10	12	2	High	0.002	8.867	41.78	1.98268e+06	546461	1.23944e+06	1.01192e+06	1.72568e+06	1.60409e+06	940123	2.61484e+06	1.18184e+06	1.36886e+06	1.92163e+06	1.99328e+06	1.52495e+06	1.05147e+06	1.3114e+06	1403938	1.74923e+06	1.49219e+06	1.16736e+06	1.59423e+06	1.16738e+06	1.66745e+06	1.75039e+06	1.88186e+06	1.19485	0.216514	0.327015	1.34888	0.0478672	0.101534	0.0762761	0.0965521
SP_0382	mvaD	15900305	diphosphomevalonate decarboxylase	Cytoplasmic	317	35.5	5.63	40	56	11	High	0	52.601	171.38	20437690	6.26889e+06	1.47407e+07	1.14837e+07	1.77519e+07	1.9095e+07	1.20651e+07	3.55192e+07	1.72174e+07	1.14496e+07	2.017e+07	1.62106e+07	15065210	13628889	15700511	16938954	18030180	17598640	15643624	19875514	16981058	14289998	18140564	15196418	1.1841	0.0204241	0.0612004	0.907177	0.385278	0.493914	0.163463	0.191934
SP_0383	SP_0383	15900306	phosphomevalonate kinase	CytoplasmicMembrane	335	37	4.92	6	4	2	High	0.002	5.87	7.13	2.1668e+06	560318	1.16662e+06	1.10028e+06	678154	1.97246e+06	857826	2.48345e+06	1393525	970582	1.65413e+06	1.63837e+06	1.66852e+06	1.07979e+06	1.23708e+06	1.53215e+06	685041	1.8354e+06	1.06399e+06	1.51741e+06	1.37496e+06	1.17618e+06	1.5057e+06	1.55204e+06	1.01686	0.889733	0.927932	1.07015	0.631837	0.725901	0.971783	0.975849
SP_0384	SP_0384	15900307	isopentenyl pyrophosphate isomerase (EC:5.3.3.2)	Cytoplasmic	336	37.7	5.77	21	15	6	High	0	21.471	39.69	3.56549e+06	1.2628e+06	2.41831e+06	2.21567e+06	4.27668e+06	4.40822e+06	2.644e+06	8.97145e+06	5.28206e+06	4.10112e+06	5.68145e+06	5.11461e+06	2.72049e+06	2.52925e+06	2.56618e+06	3.14432e+06	4.33059e+06	4.09254e+06	3.33229e+06	5.25794e+06	5217524	5066829	5.14245e+06	4.8148e+06	1.47999	0.0192935	0.058737	1.08809	0.525989	0.631843	0.00461188	0.00835991
SP_0385	SP_0385	15900308	hypothetical protein	CytoplasmicMembrane	232	27.2	8.76	6	2	1	High	0.005	4.27	5.65													na	na	na	na	na	na	na	na	na	na	na	na	na	na	na	na	na	na	na	na
SP_0386	hk3	15900309	sensor histidine kinase	CytoplasmicMembrane	331	37.9	5.74	3	4	1	High	0.008	3.7	8.15	1.30006e+06	458012	828465	425706	649254	648855	450594	1.08644e+06	595766	505566	694299	676815	1.00884e+06	874348	874265	580102	655717	607943	553642	685472	589937	607390	636822	642877	0.668645	0.00252838	0.0149684	1.03173	0.622597	0.71915	0.000438025	0.00112314
SP_0387	rr3	15900310	DNA-binding response regulator	Cytoplasmic	210	23.5	4.94	29	51	6	High	0	28.087	153.21	1.06094e+07	2.84279e+06	6.52689e+06	3828780	6.55876e+06	6.4328e+06	4.68526e+06	1.10242e+07	6.37051e+06	4.79548e+06	7.59982e+06	8.83845e+06	7920841	5935379	6951930	5495587	6.63971e+06	5.95615e+06	5.9737e+06	6.40412e+06	6293725	5.9449e+06	6867945	8.31174e+06	0.86944	0.244695	0.357089	1.13138	0.313376	0.423004	0.404115	0.436488
SP_0391	cbpF	15900313	choline binding protein F	CytoplasmicMembrane	340	39.8	6.33	12	8	3	High	0	12.278	16.95	2.80768e+06	1.20858e+06	2.40373e+06	2.08751e+06	2.89153e+06	2.87543e+06	1.82324e+06	4.77277e+06	2.44626e+06	1.44895e+06	2.39406e+06	816070	2.15059e+06	2.42401e+06	2.54488e+06	2.95594e+06	2.92328e+06	2.67824e+06	2283844	2.85556e+06	2422440	1.76621e+06	2.17582e+06	774313	1.20198	0.0346343	0.0889505	0.623703	0.159455	0.246756	0.0762311	0.0965521
SP_0401	SP_0401	15900320	helicase	Cytoplasmic	788	88.6	4.98	16	57	9	High	0	39.36	139.15	1.65989e+07	5.75014e+06	8.47981e+06	9.30589e+06	1.30841e+07	1.33048e+07	5.37029e+06	1.48329e+07	9.94069e+06	9.57676e+06	1.20701e+07	1.3589e+07	12304543	12445017	9037315	13644355	13266227	12276232	6854400	8531577	9817611	11979607	10902022	12766110	1.15982	0.222767	0.333435	1.41439	0.0357643	0.0819366	0.0187528	0.0289247
SP_0402	SP_0402	15900321	signal peptidase I	Cellwall	204	23.4	6.24	40	20	5	High	0	28.26	56.03	3.47348e+06	1.2638e+06	547491	2.781e+06	3.14628e+06	3.99187e+06	2.67301e+06	5.17999e+06	3.74413e+06	5.49999e+06	5.18812e+06	5.74217e+06	2.64564e+06	2.52925e+06	576609	3.95863e+06	3.18648e+06	3.70458e+06	3.37075e+06	3.0925e+06	3.69673e+06	6.82478e+06	4701531	5.40599e+06	1.88641	0.174783	0.280788	1.66657	0.014048	0.042252	0.0482039	0.064631
SP_0403	rnhC	15900322	ribonuclease HIII (EC:3.1.26.4)	Cytoplasmic	293	32.3	8.84	29	30	8	High	0	32.001	77.79	3.31682e+06	916399	2.23088e+06	2.16746e+06	4.60001e+06	4.92815e+06	2337496	3.13044e+06	2.9891e+06	3.11738e+06	4.06076e+06	3.94479e+06	2.53329e+06	1.80987e+06	2363926	3.07183e+06	4.65462e+06	4572622	2948021	1.90031e+06	2.95591e+06	3841103	3683659	3.71611e+06	1.83374	0.0243872	0.0683544	1.44035	0.059214	0.119139	0.0141502	0.0224013
SP_0404	zapA	15900323	cell division protein ZapA	Cytoplasmic	100	11.6	4.88	52	57	5	High	0	34.782	201.39	3.15516e+07	9.66859e+06	2.22924e+07	1.36747e+07	1.91046e+07	2.27574e+07	21647779	5.25031e+07	2.87651e+07	1.94839e+07	2.37333e+07	2.4882e+07	23153106	21476006	23857476	20263792	19348012	20989630	28181868	29012074	28422228	24626610	21261986	23318856	0.884866	0.0358041	0.0913513	0.808346	0.00801318	0.0291909	0.000235802	0.000673721
SP_0406	SP_0406	15900325	MutS2 family protein	Cytoplasmic	778	87.6	6.87	46	243	33	High	0	164.431	658.93	1.67102e+08	6.75919e+07	1.25438e+08	7.73273e+07	1.06265e+08	1.30264e+08	9.65237e+07	2.22786e+08	1.27544e+08	9.17943e+07	1.2351e+08	1.13128e+08	118745304	165336064	134653648	119145976	107518144	118664752	128908896	117426480	126176328	118458816	110073608	105209896	0.824695	0.145248	0.247941	0.895924	0.0687601	0.132657	0.0936549	0.116462
SP_0408	SP_0408	15900327	sodium:alanine symporter family protein	CytoplasmicMembrane	440	46.6	8.51	13	52	5	High	0	25.904	168.3	1.90575e+07	7.99297e+06	1.27683e+07	7.33496e+06	1.44065e+07	1.08601e+07	6.98334e+06	1.8609e+07	1.04814e+07	1.01629e+07	1.00853e+07	22000628	14121905	17577706	13663649	10681545	14583788	10070749	8946310	10640670	10370280	12766012	9110561	20612800	0.778958	0.139091	0.241698	1.41833	0.2904	0.3965	0.261241	0.291347
SP_0409	SP_0409	15900328	hypothetical protein	Unknown	182	19.8	4.88	20	27	4	High	0	21.054	92.09	7.54802e+06	2.28422e+06	4.87188e+06	3.88078e+06	5.48534e+06	6.25765e+06	4.84724e+06	1.22262e+07	6.07852e+06	7.22505e+06	6.73023e+06	8.94746e+06	5676321	4713398	5.1786e+06	5.56904e+06	5.55596e+06	5799430	6.18076e+06	7078267	6007406	9005658	6.08647e+06	8414777	1.08711	0.194952	0.302681	1.2201	0.225775	0.326553	0.0191992	0.0294241
SP_0411	serS	15900330	seryl-tRNA synthetase (EC:6.1.1.11)	Cytoplasmic	424	47.7	5.08	75	684	30	High	0	285.871	2505.53	1.39492e+09	4.36347e+08	9.21996e+08	4.88043e+08	7.22994e+08	7.89091e+08	9.09982e+08	1.93094e+09	1.13427e+09	4.6525e+08	6.20787e+08	6.10655e+08	951347520	1169678720	1001153536	785928192	734436736	713889536	1259346816	945690496	1112035712	613728448	545607488	565188672	0.715607	0.00834432	0.0334698	0.519893	0.0019622	0.0118034	0.00012306	0.000391702
SP_0412	SP_0412	15900331	hypothetical protein	Unknown	123	13.7	9.95	27	36	4	High	0	16.004	83.84	4.85197e+06	1.46088e+06	3.28373e+06	2.94753e+06	4.32184e+06	4781181	1749973	4.4177e+06	2.36552e+06	2.7257e+06	4.05598e+06	3.73552e+06	3.67556e+06	2952219	3.48235e+06	4.20665e+06	4.37109e+06	4.43416e+06	2194648	2.65278e+06	2.3434e+06	3.35474e+06	3683659	3.52818e+06	1.28702	0.0193907	0.0588789	1.46945	0.00331081	0.0159818	0.000119504	0.000384463
SP_0413	SP_0413	15900332	aspartate kinase (EC:2.7.2.4)	Cytoplasmic	454	50.2	6.15	55	334	17	High	0	152.644	1195.21	4.8168e+08	1.35872e+08	3.10612e+08	2.33048e+08	3.66623e+08	4.00171e+08	2.4606e+08	5.86206e+08	3.20915e+08	2.43832e+08	3.64598e+08	3.83394e+08	336243776	344366336	336237856	368697696	372610208	363124640	333496512	298785760	316202784	319168288	321777728	354923424	1.08613	0.00163852	0.0115789	1.04996	0.355988	0.461918	0.0119064	0.0192556
SP_0415	SP_0415	15900334	enoyl-CoA hydratase (EC:4.2.1.17)	Cytoplasmic	261	28.7	6.16	53	239	16	High	0	91.228	719.1	1.97518e+08	5.34173e+07	1.33282e+08	1.39254e+08	1.93521e+08	2.07171e+08	9.79361e+07	2.34305e+08	1.30124e+08	1.28375e+08	1.67846e+08	1.75935e+08	140356032	129086792	143306288	217263392	196869312	188521984	130808880	123021248	128146296	165936928	148842720	163587056	1.4601	0.0020129	0.0130608	1.25235	0.00436681	0.019701	4.66335e-05	0.000187158
SP_0416	SP_0416	15900335	MarR family transcriptional regulator	Cytoplasmic	144	16.7	9.17	62	107	7	High	0	54.162	320.59	9.46985e+07	4.04268e+07	8.12186e+07	5.11231e+07	5.91237e+07	6.54086e+07	5.93299e+07	1.02192e+08	7.14317e+07	5.59009e+07	6.27135e+07	6.16195e+07	68027728	96319160	87320240	77990072	59919324	59898080	78610344	55131192	70414248	71637544	55901340	57487440	0.785989	0.15417	0.258846	0.9063	0.512725	0.619389	0.202404	0.231981
SP_0417	SP_0417	15900336	3-oxoacyl-ACP synthase (EC:2.3.1.41)	Cytoplasmic	324	34.9	5.02	26	73	8	High	0	36.765	208.11	3.70211e+07	1.15313e+07	2.48241e+07	2.51278e+07	3.54329e+07	3.89134e+07	2.38605e+07	5.66006e+07	32005410	2.58592e+07	4.33365e+07	3.88153e+07	27032648	25760822	26543390	37665020	35876576	35717908	31232414	31199408	31577672	32838490	38696336	36274092	1.37716	0.000131307	0.0031292	1.14679	0.0481813	0.101798	8.58244e-05	0.00030291
SP_0418	acpP	15900337	acyl carrier protein	Cytoplasmic	74	8.3	3.8	42	164	3	High	0	15.959	574.68	3.68191e+08	1.64676e+08	2.60014e+08	1.92674e+08	2.04609e+08	2.43086e+08	2.38063e+08	5.2082e+08	4.09982e+08	2.4888e+08	2.59036e+08	3.05582e+08	257967968	421822464	280899008	304034272	208041760	221134240	322483680	266687984	403796064	325799872	228831168	283811904	0.763213	0.246202	0.358327	0.844381	0.354711	0.461281	0.369202	0.402453
SP_0419	fabK	15900338	enoyl-ACP reductase	Cytoplasmic	324	34.2	5.47	58	202	14	High	0	101.943	772.08	2.4367e+08	8.81822e+07	1.74784e+08	1.52751e+08	2.23997e+08	2.62605e+08	1.54405e+08	3.0862e+08	1.89717e+08	1.49658e+08	2.04656e+08	2.0788e+08	172315488	218585120	188768048	239693264	227338624	239243664	207239728	160951344	187235200	194886416	181392896	193205424	1.21841	0.047359	0.10681	1.02531	0.717652	0.791915	0.0383684	0.0534131
SP_0420	SP_0420	15900339	ACP S-malonyltransferase	Cytoplasmic	306	33.1	4.82	59	215	14	High	0	97.968	728.1	1.09579e+08	3.47721e+07	7.44059e+07	8.00553e+07	1.16235e+08	1.23006e+08	7.48147e+07	1.94223e+08	1.00122e+08	9.47951e+07	1.48059e+08	1.51558e+08	78805816	82355808	79979888	123566520	117669120	112305176	99520792	102631808	98593728	122384816	131229224	141359440	1.46611	0.000233011	0.00406844	1.31331	0.00333887	0.0160512	5.81537e-06	3.71193e-05
SP_0421	fabG	15900340	3-ketoacyl-ACP reductase (EC:1.1.1.1)	Cytoplasmic	243	25.7	5.68	77	303	15	High	0	139.7	1123.92	5.42228e+08	1.95564e+08	4.11317e+08	4.9308e+08	6.62028e+08	7.18353e+08	3.64021e+08	7.67317e+08	4.70734e+08	5.16081e+08	7.38994e+08	6.22737e+08	377303360	505372224	444846848	794174080	672428736	649946560	496519392	387576928	463825024	682025024	648560768	576246976	1.59436	0.0109879	0.0399123	1.41465	0.0172186	0.048904	0.0023581	0.0047162
SP_0422	fabF	15900341	3-oxoacyl-ACP synthase (EC:2.3.1.41)	CytoplasmicMembrane	411	43.9	5.67	73	501	25	High	0	247.291	2127.17	6.93821e+08	2.413e+08	5.05885e+08	4.44078e+08	6.40599e+08	7.39508e+08	3.98222e+08	8.59697e+08	5.34349e+08	4.35403e+08	5.76229e+08	5.23146e+08	480966240	627805120	548125696	713455424	651079360	669764352	543664000	432914496	525812512	573602112	506314176	484078208	1.22778	0.0613044	0.129494	1.041	0.651793	0.740846	0.0276084	0.0402064
SP_0423	accB	15900342	acetyl-CoA carboxylase biotin carboxyl carrier protein subunit (EC:6.4.1.2)	Unknown	161	17	4.53	28	39	5	High	0	30.143	141.88	8.00371e+07	2.7242e+07	6.03666e+07	4.93075e+07	6.74159e+07	6.92283e+07	5.42855e+07	1.04213e+08	7.03941e+07	4.93225e+07	6.59147e+07	6.68397e+07	57642924	63588292	64875876	75178456	68341480	63360744	71882344	56175692	69428680	63069164	58735528	62320716	1.11162	0.163917	0.270719	0.932343	0.464385	0.568605	0.401542	0.434099
SP_0424	fabZ	15900343	(3R)-hydroxymyristoyl-ACP dehydratase	Cytoplasmic	140	15.3	8.35	52	96	10	High	0	45.832	264.87	5.82444e+07	1.83371e+07	4.8768e+07	4.11059e+07	7.16658e+07	6.89683e+07	2.76292e+07	6.66682e+07	3.6491e+07	3.35516e+07	4.41655e+07	4.12778e+07	42176224	41948960	52371700	62403428	72704824	63178600	36149528	36566040	36014672	42755776	39495584	38602172	1.45268	0.0128679	0.0446545	1.1115	0.028647	0.0702991	9.11227e-05	0.000316948
SP_0425	accC	15900344	acetyl-CoA carboxylase biotin carboxylase subunit (EC:6.4.1.2)	Cytoplasmic	455	49.5	5.2	52	256	20	High	0	114.632	773.52	1.32443e+08	4.72224e+07	9.66717e+07	9.20077e+07	1.25951e+08	1.43346e+08	6.14896e+07	1.52534e+08	8.78877e+07	7.91517e+07	1.05232e+08	1.01432e+08	94256920	113402752	104061048	142393152	127821416	130470080	81573496	81585592	86672528	101990384	93306736	94077536	1.2854	0.0158324	0.0517104	1.15828	0.0136254	0.0416853	0.000103986	0.000346621
SP_0426	SP_0426	15900345	acetyl-CoA carboxylase subunit beta (EC:6.4.1.2)	Cytoplasmic	288	31.8	8.62	59	191	18	High	0	86.099	625.48	1.04535e+08	35978565	7.62945e+07	6.19566e+07	8.93468e+07	9.71905e+07	4.25303e+07	1.08403e+08	6.17159e+07	5.84732e+07	7.0059e+07	6.96321e+07	75286824	85339288	82030480	95062704	90566648	88850408	56044656	58262864	60854900	75017088	62454424	64922692	1.13114	0.0419974	0.0993286	1.15547	0.0793101	0.146968	0.000122084	0.000389631
SP_0427	accA	15900346	acetyl-CoA carboxylase subunit alpha (EC:6.4.1.2)	Cytoplasmic	255	28.2	6.4	53	119	12	High	0	63.787	386.82	8.71549e+07	2.3675e+07	6.59974e+07	5.18288e+07	8.67308e+07	9.46767e+07	3.81318e+07	9.10479e+07	5.39096e+07	4.31821e+07	5.88271e+07	5.7879e+07	62733312	55028684	70916080	79084056	87928072	86576280	50156136	49373276	53167240	55164252	52445640	54047272	1.34403	0.0202453	0.0608403	1.05868	0.0999311	0.171624	0.0001249	0.000396102
SP_0433	nusB	15900351	transcription antitermination protein NusB	Cytoplasmic	140	16	5.05	32	24	3	High	0	9.871	74.46	2.07043e+07	8.45442e+06	18543372	1.2877e+07	1.56025e+07	15586236	1.66702e+07	28310245	1.95626e+07	14325746	17300772	1.6644e+07	15282741	18641368	19777338	19053132	15800085	14387986	21700638	15964718	19348544	17981762	15551609	15570232	0.916944	0.483198	0.597464	0.861257	0.230207	0.330802	0.497801	0.526309
SP_0434	SP_0434	15900352	hypothetical protein	Cytoplasmic	129	14.1	5.02	67	99	7	High	0	35.955	314.25	7.5652e+07	1.92466e+07	5.59574e+07	4.77864e+07	5.80728e+07	7.76112e+07	6.35339e+07	1.35775e+08	8.18855e+07	4.70809e+07	7.31357e+07	7.29178e+07	54599040	44116868	60131804	72837696	58904860	71012384	84268896	72805952	80760840	60216636	65109792	67988824	1.27641	0.0940637	0.182493	0.81281	0.0211394	0.0563314	0.0119845	0.0193559
SP_0435	efp	15900353	elongation factor P	Cytoplasmic	186	20.6	4.92	64	405	10	High	0	108.844	1580.12	7.10852e+08	2.38274e+08	4.84455e+08	3.18018e+08	4.71048e+08	5.19815e+08	5.01173e+08	1.06663e+09	6.43326e+08	4.0625e+08	5.79437e+08	5.28276e+08	492536160	619605440	524200800	506943872	478294208	471456768	686844992	534714240	633051840	534846944	508932608	488687904	0.890214	0.194839	0.302681	0.826301	0.0760041	0.141939	0.0621324	0.0808665
SP_0436	gatB	15900354	aspartyl/glutamyl-tRNA amidotransferase subunit B	Cytoplasmic	480	53.6	5.29	69	382	34	High	0	197.316	1282.08	2.81282e+08	8.74508e+07	1.93059e+08	1.40026e+08	1.94527e+08	2.19897e+08	1.81666e+08	4.00715e+08	2.36214e+08	1.48704e+08	2.09012e+08	2.22939e+08	197940880	216764448	208264816	218863216	197885248	200301584	245565440	207063680	232527408	193569792	184908672	207082784	0.990497	0.822372	0.875695	0.854639	0.0606485	0.120782	0.0858558	0.107432
SP_0438	gatC	15900356	aspartyl/glutamyl-tRNA amidotransferase subunit C	Unknown	100	11	4.74	59	66	6	High	0	50.203	238.91	4.95082e+07	1.98746e+07	4.00996e+07	3.52971e+07	4.53915e+07	5.23861e+07	50656199	7.44601e+07	4.46645e+07	3.77506e+07	4.74505e+07	4.67254e+07	35976296	45806520	43001196	53403188	46020112	48043528	67044268	40691684	44098756	48179076	42424700	43628764	1.18178	0.11511	0.210045	0.88407	0.565457	0.669304	0.497647	0.526309
SP_0439	prfC	15900357	peptide chain release factor 3	Cytoplasmic	514	58.4	5.2	57	290	31	High	0	188.067	940.07	1.44773e+08	4.94604e+07	1.04144e+08	8.50459e+07	1.22977e+08	1.3419e+08	1.04895e+08	2.63378e+08	1.44746e+08	1.17138e+08	1.65571e+08	1.56156e+08	103365064	119209832	111949384	131311088	124775528	122297776	140450384	137730000	142920368	151486912	147082032	145064768	1.13111	0.0550405	0.119511	1.05351	0.0352898	0.0811666	0.000177421	0.000526992
SP_0441	rpmB	15900358	5S ribosomal protein L28	Cytoplasmic	62	6.9	11.19	40	55	3	High	0	13.139	139.14	1.04524e+08	3.59851e+07	7.59552e+07	8.124e+07	1.12261e+08	1.1721e+08	9.71703e+07	2.39096e+08	1.18222e+08	7.14469e+07	1.43735e+08	1.42189e+08	75286824	85339288	81706880	125304088	113608384	106852752	129858408	125561072	116325968	91813464	127704984	132094256	1.42682	0.00389963	0.0200403	0.945843	0.605066	0.702715	0.00770137	0.0131273
SP_0442	SP_0442	15900359	hypothetical protein	CytoplasmicMembrane	121	12.9	4.97	77	129	7	High	0	78.133	518.42	9.99213e+07	3.22684e+07	6.54118e+07	5.40343e+07	6.47315e+07	7.83309e+07	7.75611e+07	1.45317e+08	8.48705e+07	6.09327e+07	7.89576e+07	7.64659e+07	71694120	76157376	70268816	82524624	65601620	71649576	103306296	77458416	83716768	78138520	70329952	71333008	1.00759	0.961521	0.976597	0.831066	0.124535	0.202888	0.137909	0.164014
SP_0443	codY	15900360	conserved_hypothetical_protein	Unknown	555	60.1	4.54	57	423	22	High	0	203.058	1560.18	4.97596e+08	1.78124e+08	3.26904e+08	2.52332e+08	3.41724e+08	3.70717e+08	2.55952e+08	6.68012e+08	3.55571e+08	3.06744e+08	3.67983e+08	3.85971e+08	347200832	456771968	353606368	399508704	347210752	336921536	347270976	339110432	350650272	402860768	324405632	357691616	0.936127	0.586806	0.690728	1.04621	0.549951	0.655582	0.703071	0.729831
SP_0445	SP_0445	15900362	acetolactate synthase catalytic subunit (EC:2.2.1.6)	Cytoplasmic	566	61.7	5.49	52	249	23	High	0	148.605	829.48	1.24945e+08	4.75983e+07	8.95259e+07	9.31211e+07	1.27002e+08	1.4288e+08	5.22651e+07	1.07986e+08	6.61562e+07	8.03526e+07	1.07591e+08	1.07132e+08	89346192	114411776	96283312	144136640	128836456	130470080	69193912	58262864	65289620	103557040	95955096	99644016	1.34463	0.0210128	0.0619796	1.55207	0.00131337	0.00933709	4.2233e-05	0.000172968
SP_0446	ilvH	15900363	acetolactate synthase 3 regulatory subunit (EC:2.2.1.6)	CytoplasmicMembrane	158	17.7	10.3	51	81	9	High	0	43.321	270.28	1.77435e+07	5.92497e+06	1.23182e+07	1.25347e+07	1.71436e+07	1.9986e+07	5.77427e+06	13508353	8.06677e+06	1.08224e+07	1.32438e+07	1.22019e+07	13104766	12831483	13127822	18448484	17320568	18423748	7373317	7.80609e+06	7971907	13527736	11886518	11456752	1.38728	0.000120722	0.00311842	1.59261	0.00112676	0.00869533	3.19376e-07	4.38291e-06
SP_0447	SP_0447	15900364	ketol-acid reductoisomerase (EC:1.1.1.86)	Cytoplasmic	340	37.3	4.94	59	607	28	High	0	213.477	1980.84	9.13588e+08	3.07744e+08	6.19412e+08	5.2737e+08	7.34546e+08	8.10657e+08	3.7828e+08	7.96001e+08	4.62972e+08	3.40134e+08	5.21642e+08	4.85899e+08	630302592	812164736	671074560	850292416	746637504	733696832	515924800	401733536	455951232	446798944	459136192	449959520	1.10271	0.319244	0.430903	0.987103	0.919281	0.944235	0.000230324	0.00065964
SP_0450	SP_0450	15900367	threonine dehydratase (EC:4.3.1.19)	Cytoplasmic	416	45.4	5.78	60	215	22	High	0	112.162	678.75	1.50208e+08	5.33736e+07	1.13949e+08	8.79764e+07	1.19599e+08	1.29326e+08	5.91238e+07	1.3294e+08	7.72953e+07	7.18012e+07	9.41882e+07	9.57974e+07	106863544	129086792	122758680	136058336	121730296	117756232	78340912	71252776	76227976	92334800	83767432	89252256	1.04693	0.545727	0.654647	1.17506	0.015841	0.0457756	5.92204e-05	0.000226546
SP_0451	SP_0451	15900368	hypothetical protein	Unknown	71	8.2	9	70	219	7	High	0	49.667	718.7	5.34301e+08	1.27115e+08	3.50888e+08	2.32605e+08	3.21563e+08	3.72687e+08	3.62716e+08	8.40979e+08	4.64435e+08	3.05586e+08	444310000	4.56943e+08	371832864	320486528	379666240	368697696	326890560	338727904	495135520	423666080	456936480	401528928	390932736	423209536	0.96486	0.621818	0.71222	0.88365	0.073445	0.138563	0.00429201	0.00783929
SP_0452	glnQ	15900369	amino acid ABC transporter ATP-binding protein	CytoplasmicMembrane	246	27.9	6.16	61	94	14	High	0	76.576	298.21	5.29577e+07	1.75918e+07	4.20471e+07	2.87427e+07	3.58402e+07	4.12027e+07	4.65288e+07	9.32231e+07	6.11647e+07	4.63894e+07	5.79076e+07	6.06355e+07	38472656	40266356	45046916	43204792	36282376	37819176	61406480	50526460	60362068	59309364	51648024	56557788	0.947655	0.483761	0.597527	0.972258	0.744626	0.811754	0.00114937	0.00258771
SP_0453	SP_0453	15900370	amino acid ABC transporter amino acid-binding protein/permease	CytoplasmicMembrane	521	57.4	5.48	58	339	27	High	0	203.285	1202.5	9.40148e+07	2.7008e+07	5.92845e+07	4.70869e+07	6.82695e+07	7.39422e+07	4.76519e+07	1.34625e+08	7.28555e+07	7.08322e+07	9.61459e+07	1.0161e+08	67534096	63097496	63689676	71745776	69254712	67642512	63016492	72288440	71892288	91031120	85445984	95005632	1.0737	0.0593512	0.126979	1.31026	0.00757506	0.0284763	0.000248405	0.000699731
SP_0454	SP_0454	15900371	hypothetical protein	CytoplasmicMembrane	629	70.7	5.63	31	90	13	High	0	67.768	256.68	1.6229e+07	5.37975e+06	1.02815e+07	7.49406e+06	1.01937e+07	1.13908e+07	1.17152e+07	2.95807e+07	1.68045e+07	11574648	14380895	1.67187e+07	12013313	11605858	10985447	10920304	10327454	10530408	15118499	16673044	16586461	14544211	12959889	15663664	0.918322	0.0509891	0.113865	0.892301	0.142504	0.225223	0.000106439	0.000353653
SP_0457	uppP	15900373	UDP pyrophosphate phosphatase (EC:3.6.1.27)	CytoplasmicMembrane	281	31.8	9.52	12	29	3	High	0	16.231	98.82	2.45326e+07	9.9093e+06	1.58222e+07	1.14574e+07	1.28431e+07	1.62396e+07	1.62557e+07	3.56466e+07	2.17897e+07	1.49987e+07	1.7589e+07	2.02398e+07	18033406	22035792	16880248	16938954	12962223	14938594	21172856	19929578	21518586	18874546	15819544	18932536	0.787361	0.0988604	0.18866	0.856368	0.0685013	0.132594	0.0317048	0.0451849
SP_0459	pfl	15900375	formate acetyltransferase	Cytoplasmic	774	87.8	5.25	67	775	51	High	0	370.805	2656.77	1.10884e+09	3.80168e+08	8.38617e+08	2.49082e+08	3.50165e+08	3.78072e+08	2.87387e+08	6.97784e+08	4.0396e+08	2.05974e+08	2.67455e+08	2.64622e+08	762792192	1012513088	910684096	394640736	355338304	343245952	390024704	353822304	397891648	268827616	235853088	245921584	0.40701	0.000645362	0.00690365	0.65742	0.00137239	0.00963963	1.0634e-06	1.07233e-05
SP_0473	mgrA	15900388	ROK family protein	Cytoplasmic	407	45.7	6.24	16	14	5	High	0	22.889	39.94	4.25417e+06	1.25838e+06	4.21863e+06	1.39274e+06	3.32126e+06	3.67344e+06			25072.9		41160.8	43815.6	3.22852e+06	2.52925e+06	4484843	1.9469e+06	3.35858e+06	3.40887e+06	na	na	24905.2	na	38494.2	42033.3	0.850793	0.54106	0.651058	1.61668	na	na	1.94981e-05	9.24813e-05
SP_0479	SP_0479	15900394	Trk family potassium uptake protein	CytoplasmicMembrane	479	52.9	9.52	7	23	4	High	0	13.462	24.55	1.58396e+07	7.39525e+06	1.59747e+07	8.6402e+06	2.14515e+07	1.46759e+07	5.01256e+06	1.17919e+07	7.73457e+06	3.0011e+06	4.41677e+06	4.45632e+06	11721973	16217889	17094796	12639930	21781130	13561836	6.3879e+06	6853798	7636293	3.69136e+06	4.00812e+06	4.20456e+06	1.06547	0.834581	0.885461	0.570172	0.000956072	0.00789769	5.2724e-05	0.000207439
SP_0480	trkA	15900395	potassium transporter peripheral membrane protein	CytoplasmicMembrane	449	49.7	7.28	43	146	17	High	0	95.136	439.04	5.50411e+07	1.74933e+07	3.78831e+07	3.07977e+07	4.05633e+07	4.19245e+07	4.13707e+07	82413930	4.93371e+07	4.08924e+07	5.12739e+07	5.41924e+07	39897788	40026212	40632928	46444216	41150996	38458548	54571652	44855420	48633060	52187384	45796112	50606464	1.0456	0.495503	0.604981	1.00358	0.942803	0.963335	0.0200606	0.0305879
SP_0481	SP_0481	15900396	hypothetical protein	Unknown	282	31.4	5.94	21	17	5	High	0	22.166	56.67	8398862	2.98373e+06	5.90283e+06	5.30424e+06	7.5753e+06	9.26837e+06	4.86402e+06	1.24891e+07	5.82213e+06	6.7676e+06	8.84788e+06	8.40166e+06	6.30325e+06	6242851	6.27868e+06	7663936	7672945	8571538	6193701	7246438	5.75071e+06	8424983	7989765	7899606	1.27005	0.00308601	0.0172995	1.26698	0.0274165	0.0684246	0.00252428	0.00498213
SP_0483	SP_0483	15900398	ABC transporter ATP-binding protein	CytoplasmicMembrane	560	62.8	4.96	18	21	9	High	0	32.903	54.8	9.24229e+06	2.40426e+06	5.91769e+06	4.45518e+06	8.00735e+06	8.29702e+06	6.87563e+06	1.54594e+07	1.00578e+07	7.10184e+06	1.16031e+07	1.32645e+07	6921693	4.97411e+06	6300037	6422801	8108585	7.67877e+06	8816153	8921327	9975524	8841512	10454352	12485570	1.22062	0.166907	0.274103	1.14681	0.296116	0.402484	0.00550927	0.00974799
SP_0486	SP_0486	15900400	RNA methyltransferase	Cytoplasmic	167	19.5	5.59	20	9	3	High	0	10.051	14.98	712368	167472	521863	423236	703878	1.06423e+06	798873	3.1993e+06	819550	517673	1.01866e+06	841798	558560	303250	550154	575921	711333	990565	989718	1941368	811459	621997	933661	798889	1.61323	0.127517	0.228788	0.62913	0.234997	0.335231	0.0527661	0.0696583
SP_0493	rpoE	255964980	DNA-directed RNA polymerase subunit delta	Cytoplasmic	195	22.1	3.89	39	85	5	High	0	42.771	278.67	8.84182e+07	2.77145e+07	6.48433e+07	4.01471e+07	6.04639e+07	5.95033e+07	6.15927e+07	1.37982e+08	8.38062e+07	5.28073e+07	6.49506e+07	6.79109e+07	63580960	64815572	69621504	60849156	61339836	54519548	81708224	73840592	82632608	67611104	57938672	63343076	0.892386	0.0714395	0.147692	0.793063	0.0153503	0.0447995	0.00250918	0.00496867
SP_0494	pyrG	15900408	CTP synthetase (EC:6.3.4.2)	Cytoplasmic	535	59.2	5.67	58	216	24	High	0	125.574	721.54	1.21811e+08	4.39705e+07	9.8438e+07	8.1899e+07	1.08304e+08	122734080	8.65223e+07	1.82022e+08	1.11115e+08	9.86534e+07	1.28562e+08	1.16452e+08	87239928	105347216	105898072	126410400	109548176	112305176	115351728	96489040	109430120	127490912	114483152	107991856	1.16677	0.114213	0.209061	1.08932	0.297957	0.404518	0.180968	0.209615
SP_0496	SP_0496	15900410	Na/Pi cotransporter II-like protein	CytoplasmicMembrane	543	59.5	6.05	27	75	12	High	0	45.823	203.75	6.95813e+07	4.0573e+07	7.90804e+07	5.22146e+07	1.75298e+08	1.54059e+08	1.34208e+07	6.59945e+07	23795588	1.45023e+07	2.91711e+07	2.20214e+07	50275224	96819504	85053328	79709352	177574688	140455312	17352260	36195000	23491184	18236760	26161298	20612800	1.7133	0.167847	0.274872	0.843876	0.600605	0.698919	0.000507397	0.0012738
SP_0499	pgk	15900413	phosphoglycerate kinase (EC:2.7.2.3)	Cytoplasmic	398	41.9	4.98	88	1486	35	High	0	335.438	5887.22	3.17744e+09	1.16309e+09	2.35218e+09	1.99414e+09	2.60256e+09	3.0263e+09	2.55638e+09	5.04485e+09	3.30964e+09	2.63228e+09	3.45992e+09	3.23514e+09	2144262016	3266767360	2561284096	3314028032	2643725824	2723595008	3600968960	2391738112	3254680832	3555849472	3006734336	2977875456	1.08894	0.537446	0.647827	1.03169	0.770332	0.836666	0.5732	0.600209
SP_0500	SP_0500	15900414	hypothetical protein	CytoplasmicMembrane	175	19.7	9.54	7	1	1	High	0.007	3.903	2.34	1019755	185462	460199	340925	562150	570979	357092	1.00854e+06	373609	307980	576222	802550	795020	337646	484565	461899	567755	535212	436638	636781	370328	367172	529174	762025	0.967621	0.925764	0.949867	1.14866	0.671351	0.755185	0.966786	0.971645
SP_0501	SP_0501	15900415	MerR family transcriptional regulator	Cytoplasmic	118	13.9	9.73	68	87	9	High	0	42.044	244.94	2.11051e+07	8.12065e+06	1.52794e+07	1.44103e+07	1.94186e+07	2.04707e+07	1.46757e+07	3.14943e+07	1.87144e+07	1.74249e+07	2.39309e+07	2.24588e+07	15572694	17877978	16343966	21324478	19652118	18882050	19063426	17706500	18460784	21939686	21440242	21079494	1.20211	0.0269077	0.074171	1.16709	0.00311868	0.0155009	0.0014715	0.00318163
SP_0502	glnA	15900416	glutamine synthetase, type I	Cytoplasmic	448	50.3	5.05	55	417	28	High	0	202.361	1475.24	4.49038e+08	1.5078e+08	3.14089e+08	2.7605e+08	3.59431e+08	4.21999e+08	3.19565e+08	6.99061e+08	4.24068e+08	3.79848e+08	4.96501e+08	4.87737e+08	313624096	384336864	339494880	438505856	364483552	382994752	435616064	354310592	417572896	500133792	437284640	451803072	1.14317	0.172643	0.280243	1.15049	0.129852	0.208368	0.0346452	0.0489684
SP_0505	SP_0505	15900419	type I restriction-modification system subunit S	Unknown	426	49.2	6.73	22	58	5	High	0	33.588	162.41	5.71684e+06	1.74094e+06	3.91898e+06	2.40924e+06	4.56423e+06	4.8923e+06	6.80368e+06	1.38121e+07	6.33478e+06	7.60637e+06	8.22563e+06	7.96239e+06	4322026	3.54915e+06	4164795	3.42011e+06	4.61412e+06	4.5357e+06	8712038	7.9737e+06	6254233	9485752	7433485	7487358	1.04436	0.757038	0.82342	1.06393	0.636956	0.730351	0.000490087	0.00123714
SP_0508	SP_0508	15900422	type I restriction-modification system subunit S	CytoplasmicMembrane	522	59.3	6.65	14	32	3	High	0	20.719	83.32	525370		411723	351627	376811	331714	1.1462e+06	2.46121e+06	1.46678e+06	1.26929e+06	1.90482e+06	1.86366e+06	414127	na	433811	477160	380742	312017	1432690	1.50558e+06	1.45403e+06	1.54411e+06	1.73227e+06	1.75939e+06	0.919815	0.580696	0.685315	1.1465	0.0364242	0.0825511	2.46496e-06	1.99263e-05
SP_0509	SP_0509	15900423	type I restriction-modification system, M subunit	Cytoplasmic	487	56.5	5.08	41	238	24	High	0	134.502	688.19	6.79573e+07	2.07209e+07	4.12591e+07	3.33618e+07	4.92933e+07	5.09231e+07	5.11129e+07	1.20962e+08	6.6863e+07	5.7188e+07	7.86547e+07	7.71738e+07	49140076	47741488	44293344	50462204	49976436	46674920	67581416	65028848	65979700	73327088	70064512	71983200	1.04207	0.352144	0.465816	1.08452	0.00947208	0.0324911	1.25917e-06	1.18047e-05
SP_0510	SP_0510	15900424	type I restriction-modification system, R subunit	Cytoplasmic	777	89.3	5.53	34	104	20	High	0	90.615	300.81	1.99388e+07	5.89582e+06	11315423	8.48171e+06	1.2782e+07	1.37601e+07	9.38873e+06	2.58909e+07	1.41745e+07	1.57227e+07	2.02899e+07	2.07383e+07	14702520	12786002	12056443	12400320	12962223	12735451	12091600	14654059	14021310	19767830	18229774	19399404	0.963409	0.603236	0.698828	1.40793	0.00544195	0.0230448	0.000535275	0.00132439
SP_0515	hrcA	15900429	heat-inducible transcription repressor	Unknown	344	39.4	5.35	29	46	10	High	0	34.715	118.03	7.76762e+06	2.72769e+06	5.41723e+06	3.34453e+06	4.9848e+06	5.09762e+06	5.90756e+06	1.49062e+07	7.71587e+06	5.68761e+06	7.73257e+06	8.68917e+06	5838697	5.69432e+06	5765900	4.77688e+06	5.03945e+06	4729510	7555073	8587278	7626423	7063881	6.98466e+06	8171244	0.840853	0.00116489	0.00943235	0.934831	0.35422	0.461155	2.65413e-05	0.000117526
SP_0516	grpE	15900430	heat shock protein GrpE	Cytoplasmic	174	20	4.7	48	92	7	High	0	42.108	266.5	1.17257e+08	3.11209e+07	7.63413e+07	4.71164e+07	7.08386e+07	7.8727e+07	9.70992e+07	2.3341e+08	1.28088e+08	7.55868e+07	1.16501e+08	1.18237e+08	83727344	73190424	82030480	71745776	71791560	72013952	129723032	122513080	126176328	97291472	103898024	109846872	0.902084	0.0727073	0.149518	0.821951	0.00706979	0.0274358	2.62527e-06	2.05903e-05
SP_0519	dnaJ	15900433	molecular chaperone DnaJ	Cytoplasmic	378	40.5	7.24	30	190	11	High	0	84.946	592.15	7.04667e+07	2.43026e+07	4.81373e+07	2.72343e+07	4.48034e+07	4.86968e+07	6.33738e+07	1.5282e+08	9.02681e+07	5.40004e+07	7.45695e+07	7.83762e+07	50913716	56491880	51617412	40894488	45411468	44667240	84134104	81585592	89037128	69169528	66437088	73097912	0.823612	0.0135522	0.0459356	0.81923	0.00612752	0.0248995	1.23132e-06	1.16616e-05
SP_0520	SP_0520	15900434	hypothetical protein	Unknown	95	10.9	5.22	78	83	8	High	0	42.691	234.58	6.186e+07	2.22781e+07	4.67547e+07	3.28008e+07	43079556	5.02566e+07	4.02376e+07	80271004	4.77588e+07	3.60851e+07	4.76411e+07	4.69218e+07	44807772	51621776	50217024	49534324	43687004	46127508	52965352	43750076	47154636	45982784	42513436	43814732	0.950236	0.422317	0.53676	0.919656	0.248292	0.349636	0.388638	0.422051
SP_0521	SP_0521	15900435	HIT family protein	Cytoplasmic	136	15	5.47	55	51	5	High	0	33.179	230.96	5.92641e+07	2.07263e+07	4.2638e+07	2.24593e+07	2.95181e+07	3.35643e+07	3.38935e+07	6.06928e+07	4.08227e+07	1.7504e+07	2.68386e+07	2.30698e+07	42958868	47741488	45693196	33675472	29893016	30873534	44545096	33381560	40253936	22067582	24024182	21639396	0.692423	0.00143091	0.010627	0.573116	0.00367122	0.0171567	5.61575e-05	0.000218087
SP_0522	SP_0522	15900436	ABC transporter ATP-binding protein	CytoplasmicMembrane	243	27	5.14	57	79	9	High	0	50.611	243.54	1.92407e+07	5.41199e+06	1.43348e+07	7.86195e+06	1.24486e+07	1.27466e+07	1.95106e+07	41391034	2.26756e+07	1.83814e+07	2.37403e+07	2.11012e+07	14194516	11673783	15271636	11472915	12556838	11725062	25401092	23060150	22406240	23218632	21261986	19772758	0.869102	0.186779	0.295134	0.906669	0.17522	0.266234	3.19152e-05	0.000135809
SP_0523	SP_0523	15900437	ABC transporter permease	CytoplasmicMembrane	349	40.5	9.48	7	15	3	High	0.002	8.473	27.4	2057951	837304	1.49186e+06	831474	1.21034e+06	1.19597e+06	1.29685e+06	4.05235e+06	2.15481e+06	2.08555e+06	2.32314e+06	3.17445e+06	1.58543e+06	1646399	1.57694e+06	1.14976e+06	1223112	1.12072e+06	1.6227e+06	2437814	2.12603e+06	2558760	2.11249e+06	2992372	0.726504	0.000398163	0.00527566	1.23876	0.235605	0.335394	0.000709899	0.00170376
SP_0526	rr13	15900440	response regulator BlpR	Cytoplasmic	245	28.7	6.62	40	65	9	High	0	38.411	206.97	1.52361e+07	4.12987e+06	9.00801e+06	5.26352e+06	5.94372e+06	8.34017e+06	1.65902e+07	3.75376e+07	2.31512e+07	1.67707e+07	2.1733e+07	2.29988e+07	11284718	8793232	9604480	7604716	6011715	7.71559e+06	21568662	20956886	22899404	21172856	19478694	21546106	0.718675	0.0383875	0.0952337	0.950672	0.278803	0.383395	1.54662e-06	1.36467e-05
SP_0527	hk13	15900441	sensor histidine kinase BlpH	CytoplasmicMembrane	446	51.8	5.96	11	18	5	High	0	18.697	46.34	1.45535e+07	4.66294e+06	1.07269e+07	4.78632e+06	8.75492e+06	1.12402e+07	2.34388e+06	3.10219e+06	2.52788e+06	989432	1.7833e+06	1.5551e+06	10847123	9981253	11413813	6909787	8858283	10346567	2948021	1.8827e+06	2501478	1.19829e+06	1.62354e+06	1.47661e+06	0.809952	0.146498	0.249251	0.586242	0.0297142	0.0717176	1.37644e-06	1.2419e-05
SP_0549	SP_0549	15900462	hypothetical protein	Cytoplasmic	264	31.1	8.82	42	150	11	High	0	56.601	416.44	6.90488e+07	2.05665e+07	43404459	26585922	39090535	4.1986e+07	3.85631e+07	9.94015e+07	5.09967e+07	3.20974e+07	4.74186e+07	4.53503e+07	49849676	47499408	46554596	39971144	39629548	38549780	50824856	53772216	50308800	40821096	42335964	42418832	0.821039	0.00103035	0.008882	0.810659	0.00097335	0.00792874	1.11666e-05	6.06334e-05
SP_0550	trmB	15900463	tRNA (guanine-N(7)-)-methyltransferase (EC:2.1.1.33)	Unknown	211	24.4	6.24	53	127	11	High	0	65.484	439.96	41659541	1.42642e+07	2.99739e+07	2.37356e+07	3.45182e+07	3.83941e+07	2.60939e+07	5.63866e+07	3.35441e+07	2.75086e+07	3.53985e+07	3.45846e+07	30400992	32381062	32133358	35515460	34963880	35261040	34154824	31092816	33056732	34896192	31677022	32361834	1.11405	0.00602121	0.0272121	1.00642	0.883535	0.921232	0.0508831	0.0676188
SP_0552	SP_0552	15900464	hypothetical protein	Cytoplasmic	159	17.7	4.67	34	53	5	High	0	35.045	197.85	5.42894e+07	1.8859e+07	3.92196e+07	18586594	2.91714e+07	2.41546e+07	3.41546e+07	5.74339e+07	4.53036e+07	1.71128e+07	2.39393e+07	2.16053e+07	39399176	43393576	42032268	27712554	29588810	22272002	44945588	31625658	44690100	21556162	21440242	20239512	0.637479	0.00724071	0.0306141	0.521485	0.0056426	0.0236385	0.000477573	0.0012116
SP_0553	nusA	15900465	transcription elongation factor NusA	Cytoplasmic	378	42.8	4.97	60	333	29	High	0	183.348	1090.99	2.48347e+08	7.15385e+07	1.62391e+08	1.37669e+08	2.03876e+08	2.03526e+08	1.8264e+08	4.0624e+08	2.33083e+08	1.43827e+08	2.16878e+08	2.45022e+08	175088848	175361648	174690976	215662464	207025952	185802912	246935680	209558960	229574064	186984560	191940624	227430512	1.15872	0.0308313	0.0818944	0.883812	0.182218	0.274733	0.0202371	0.0307788
SP_0554	SP_0554	15900466	hypothetical protein	Cytoplasmic	97	11.2	9.61	40	34	4	High	0	21.037	96.9	2.9649e+07	1.10716e+07	2.38413e+07	17918826	2.39023e+07	29352725	2.35727e+07	3.52901e+07	2.83674e+07	2.49552e+07	2.73469e+07	2.50682e+07	21713246	24821080	25468814	26645180	24214508	27031964	30834340	19767288	28027732	31681856	24469476	23505452	1.08178	0.2562	0.366539	1.01307	0.902145	0.932349	0.871566	0.886338
SP_0555	SP_0555	15900467	hypothetical protein	CytoplasmicMembrane	99	10.9	9.88	24	5	2	High	0.003	6.709	6.71	2.32572e+06	762584	1.45893e+06	1.2638e+06	1.59736e+06	1.60661e+06	1.62665e+06	1.38548e+06	1.93125e+06	1.44951e+06	1.79834e+06	1852635	1.78925e+06	1.49396e+06	1545070	1.76069e+06	1.61769e+06	1.50147e+06	2.04187e+06	867073	1908638	1.76621e+06	1.64166e+06	1749964	1.01068	0.879631	0.921518	1.07063	0.64906	0.738455	0.92545	0.936375
SP_0556	infB	15900468	translation initiation factor IF-2	Cytoplasmic	958	105.7	8.84	62	920	62	High	0	459.782	3225.76	7.61099e+08	2.35524e+08	5.31462e+08	4.30154e+08	6.28607e+08	6.74082e+08	5.5166e+08	1.21361e+09	7.18751e+08	5.39766e+08	7.61091e+08	7.33928e+08	526527712	614139648	575317696	690433472	638882304	610306816	757921728	602200768	707812736	714201600	667743616	678489216	1.13033	0.0980864	0.188416	0.996373	0.99443	0.996128	0.0648741	0.0837986
SP_0557	rbfA	15900469	ribosome-binding factor A	Cytoplasmic	116	13.3	9.17	48	80	9	High	0	54.078	213.6	5.69911e+07	1.68506e+07	4.23471e+07	2.92648e+07	5.23224e+07	4.82244e+07	5.31708e+07	1.22783e+08	6.97791e+07	3.81561e+07	5.55782e+07	4.94164e+07	41322004	38587044	45370100	44129852	53020164	44210844	70403344	66067556	68837536	48696112	49609272	46141080	1.12837	0.19589	0.303361	0.703558	0.000251521	0.00411589	0.000152613	0.00046776
SP_0562	SP_0562	15900474	hypothetical protein	Cytoplasmic	444	51.3	4.77	20	42	9	High	0	29.444	105.52	5365367	1.57782e+06	4.04638e+06	3.59385e+06	4.45565e+06	4.37171e+06	4.36164e+06	7.98745e+06	5.6377e+06	4.31428e+06	5.61648e+06	6.44731e+06	4.06218e+06	3.20741e+06	4303473	5.14326e+06	4512860	4.0556e+06	5.54698e+06	4.70161e+06	5572981	5330050	5088471	6071948	1.1848	0.201681	0.309437	1.04228	0.6172	0.71398	0.0224921	0.0335286
SP_0563	SP_0563	15900475	hypothetical protein	Cytoplasmic	84	10.1	4.82	57	60	7	High	0	34.598	177.32	1.7562e+07	5.44852e+06	1.37039e+07	8.95945e+06	1.23578e+07	1.35548e+07	6.62613e+06	2.28613e+07	1.15516e+07	8.40966e+06	1.3098e+07	1.09417e+07	13032033	11764380	14628370	13119421	12556838	12551752	8490861	13010016	11455809	10497531	11797027	10240398	0.969644	0.696755	0.778923	0.987204	0.996034	0.996884	0.206321	0.235795
SP_0564	SP_0564	15900476	hypothetical protein	Unknown	131	14.3	10.07	53	56	7	High	0	47.233	169.49	2.15554e+07	8.33622e+06	1.49248e+07	1.39512e+07	2.04986e+07	2.34184e+07	9.29993e+06	2.09306e+07	1.19598e+07	1.28986e+07	1.91213e+07	1.66723e+07	15934982	18386748	15914979	20718194	20767274	21539294	11973887	11910020	11850513	16198064	17158824	15663664	1.25456	0.00986834	0.0372822	1.3718	0.000297755	0.00436583	4.76975e-06	3.23373e-05
SP_0567	SP_0567	15900479	hypothetical protein	Cytoplasmic	192	22.5	6.21	7	9	1	High	0.002	5.296	22.64	479332	167652	319958	272486	337063	322266	246035	428184	328566	214832	157927	230071	378466	305156	336601	366456	340317	302664	299117	277686	325801	255028	146360	219317	0.989428	0.912031	0.944053	0.687682	0.0814963	0.149367	0.0153378	0.0240278
SP_0571	SP_0571	15900482	cell filamentation protein Fic-like protein	CytoplasmicMembrane	267	30.9	4.97	30	31	5	High	0	22.215	87.4	5.13489e+06	1.11182e+06	2.85925e+06	1.32928e+06	2.50584e+06	2.53624e+06	3.22656e+06	1.02254e+07	5.19741e+06	3.14266e+06	4.73935e+06	5.15634e+06	3883829	2214185	3.03477e+06	1.86091e+06	2.53863e+06	2.36352e+06	4.08998e+06	5.95334e+06	5138529	3.86607e+06	4.29637e+06	4861731	0.740524	0.206273	0.313987	0.857878	0.316893	0.426672	0.00397456	0.00733764
SP_0577	SP_0577	15900487	PTS system beta-glucosides-specific transporter subunit IIABC	CytoplasmicMembrane	612	65.7	6.05	23	70	18	High	0	92.017	208.31	7.29526e+06	932027	1.91046e+06	5.05336e+06	7.57238e+06	9.37076e+06	3.74602e+06	8.31757e+06	5.41759e+06	2.13582e+07	3.27765e+07	4.24771e+07	5.49169e+06	1.84307e+06	2.02346e+06	7294021	7.66283e+06	8663552	4759609	4.88918e+06	5355762	27061008	29364850	39719240	2.52403	0.0405102	0.0973041	6.40773	0.000111661	0.00291233	9.31075e-05	0.00031966
SP_0578	bglA-2	15900488	6-phospho-beta-glucosidase	Cytoplasmic	471	54.3	5	18	21	6	High	0	26.729	48.4	3.92019e+07	1.60477e+07	3.35942e+07	2.3875e+07	2.85713e+07	3.50685e+07	3.15377e+07	6.39171e+07	3.85968e+07	2.81809e+07	3.80452e+07	3.71344e+07	28610240	36433152	36005540	35822336	28980364	32244932	41343604	35081088	38085112	35796940	33988164	34690780	0.960402	0.721555	0.799189	0.912375	0.145807	0.229265	0.253496	0.285094
SP_0580	SP_0580	15900490	acetyltransferase	Cytoplasmic	169	20.1	5.27	17	7	2	High	0.003	7.252	11.53	1.22269e+06	313731	806792	853793	1.32263e+06	1.88846e+06	710249	2.26114e+06	870827	1.19468e+06	2204654	1.28223e+06	947845	588323	852004	1.18236e+06	1.33439e+06	1.76122e+06	877838	1.38709e+06	861887	1.44553e+06	2.00391e+06	1.21251e+06	1.79131	0.0343171	0.0887223	1.49096	0.133344	0.213386	0.0358253	0.0505175
SP_0581	pheT	15900491	phenylalanyl-tRNA synthetase subunit beta (EC:6.1.1.2)	Cytoplasmic	801	87.1	4.73	40	336	29	High	0	201.819	1183.1	2.19993e+08	7.72628e+07	1.57627e+08	1.25187e+08	1.6793e+08	1.82293e+08	1.04462e+08	2.58037e+08	1.40215e+08	1.29537e+08	1.63815e+08	1.54595e+08	155655824	190321808	170360544	194887280	170466080	165857872	139091632	135197920	137995504	168566160	145321120	144138528	1.0288	0.721737	0.799189	1.11094	0.117405	0.19315	0.0171836	0.0266757
SP_0585	SP_0585	15900494	5-methyltetrahydropteroyltriglutamate--homocysteine S-methyltransferase (EC:2.1.1.14)	Cytoplasmic	749	84.6	5.08	38	285	31	High	0	147.259	765.73	1.06641e+08	3.38842e+07	6.94296e+07	8.22993e+07	1.13437e+08	1.27506e+08	3.49046e+07	8.99959e+07	5.0264e+07	4.97956e+07	6.85836e+07	7.59738e+07	76694576	80121928	74584192	127042368	114624016	116847984	45880008	48848620	49618912	63717792	61126512	70868680	1.54932	0.000320209	0.00490881	1.35585	0.00377537	0.017504	2.52068e-07	3.6888e-06
SP_0588	pnp	15900497	polynucleotide phosphorylase	Cytoplasmic	737	81	5.1	54	536	40	High	0	266.639	1831.27	3.62024e+08	1.19556e+08	2.50159e+08	2.00239e+08	2.39588e+08	2.76364e+08	2.32732e+08	4.89333e+08	2.89003e+08	2.39938e+08	3.16333e+08	3.20348e+08	253837792	301972320	270052352	315330464	243589552	251009216	315602720	250838400	284702624	313862464	278837760	296745728	0.980707	0.817366	0.872868	1.045	0.561432	0.665211	0.697191	0.724982
SP_0589	SP_0589	15900498	serine acetyltransferase	Cytoplasmic	205	22.5	8.59	24	19	3	High	0	16.292	53.6	2.14977e+06	754277	1503720	1.12577e+06	1.71586e+06	2.22549e+06	1.36006e+06	3.6218e+06	1.52768e+06	1.26195e+06	2.25823e+06	2.07593e+06	1.65342e+06	1.47547e+06	1.58757e+06	1.57494e+06	1.73911e+06	2.07637e+06	1698792	2.18716e+06	1513338	1.53178e+06	2058202	1.96664e+06	1.14289	0.216901	0.327176	1.02914	0.83015	0.879653	0.5795	0.606277
SP_0590	SP_0590	15900499	acetyltransferase	Cytoplasmic	294	33.6	4.96	34	68	11	High	0	45.506	180.85	4.8838e+07	9.57856e+06	1.87889e+07	2.34005e+07	2.09485e+07	2.10184e+07	9.82822e+06	2.41891e+07	1.47784e+07	9.17223e+06	1.405e+07	1.34608e+07	35476640	21266258	20099334	35055364	21172856	19340344	12667313	13723263	14613312	11459948	12691592	12672599	0.983425	0.947046	0.967796	0.898065	0.115762	0.191793	0.008785	0.0147441
SP_0591	cysS	15900500	cysteinyl-tRNA synthetase (EC:6.1.1.16)	Cytoplasmic	447	51	5.33	53	217	27	High	0	144.773	627.58	6.78273e+07	1.57635e+07	4.36535e+07	2.67244e+07	3.71325e+07	3.74077e+07	5.74346e+07	1.58439e+08	7.61571e+07	4.63651e+07	6.80957e+07	7.06106e+07	48998168	35955248	46877788	40124908	37600852	34347216	76052672	84161168	75144040	59309364	60683760	65851816	0.850125	0.218907	0.328924	0.789627	0.00793696	0.0290033	7.39593e-05	0.00026652
SP_0593	SP_0593	15900502	hypothetical protein	Cytoplasmic	294	34.3	5.26	17	17	4	High	0	16.956	52.49	3.02202e+06	1.09024e+06	1.9658e+06	1.35028e+06	2.33121e+06	2.34788e+06	2.24021e+06	5.79488e+06	2.97162e+06	2601111	3.15839e+06	3.40437e+06	2.30831e+06	2.17233e+06	2.08728e+06	1.88956e+06	2.35644e+06	2.18754e+06	2.82009e+06	3.44385e+06	2936153	3.19282e+06	2.87168e+06	3208615	0.97954	0.753169	0.820743	1.00794	0.890585	0.924473	0.000897751	0.00211236
SP_0599	SP_0599	15900507	transmembrane protein Vexp1	CytoplasmicMembrane	425	46.5	6.11	43	98	18	High	0	94.734	252.61	1.24413e+08	3.82218e+07	8.61773e+07	2.41116e+07	4.43521e+07	4.86214e+07	6.32086e+06	1.40696e+07	7.86342e+06	1.89388e+06	2.44185e+06	1.30422e+06	88644024	90821368	92719216	36129288	45005684	44575968	8087735	8.1412e+06	7764617	2310663	2.22104e+06	1.23138e+06	0.461859	0.000436944	0.00553778	0.240193	0.00199689	0.0118901	2.71372e-08	7.76829e-07
SP_0600	SP_0600	15900508	ABC transporter ATP-binding protein	CytoplasmicMembrane	215	23.8	8.48	52	131	9	High	0	69.718	471.52	4.5974e+08	1.38062e+08	3.07239e+08	8.55641e+07	1.10366e+08	1.17164e+08	4.01959e+07	1.02946e+08	5.87235e+07	1.45958e+07	2.16377e+07	2.20481e+07	321167072	349682944	331896576	132259992	111578552	106852752	52965352	55653496	57898164	18364292	19389502	20612800	0.349731	0.000111066	0.00305571	0.350514	1.5485e-05	0.00121093	2.15403e-10	2.87204e-08
SP_0601	SP_0601	15900509	transmembrane protein Vexp3	CytoplasmicMembrane	459	50	8.79	49	276	29	High	0	201.105	881.57	3.41304e+08	1.15511e+08	2.26061e+08	9.9294e+07	1.27821e+08	1.49863e+08	2.32465e+07	6.68482e+07	3.17142e+07	1.697e+07	2.44951e+07	2.38534e+07	239369264	291414976	244028576	153971344	129852136	136825056	30303482	36618912	31281798	21428382	21974980	22385904	0.542903	0.00162264	0.0115789	0.669923	0.00267892	0.0141548	1.38581e-09	9.78221e-08
SP_0603	rr1	15900511	DNA-binding response regulator VncR	Cytoplasmic	218	25	4.77	28	35	6	High	0	26.135	75.67	1.64734e+07	4.49761e+06	7.25937e+06	3.7675e+06	4.45397e+06	3.5121e+06	3.17583e+06	9.68366e+06	3.72354e+06	2.17479e+06	3.0588e+06	4.42885e+06	12231765	9621874	7.73236e+06	5407446	4.50273e+06	3.26096e+06	4.02568e+06	5659705	3.67698e+06	2.65809e+06	2.78138e+06	4.17638e+06	0.445181	0.014902	0.0495035	0.719621	0.162506	0.250486	0.00250426	0.00496712
SP_0604	hk1	15900512	sensor histidine kinase VncS	Cytoplasmic	442	50.4	5.66	15	21	6	High	0	24.351	66.68	6807686	2.66168e+06	5.3806e+06	2.53269e+06	3.94656e+06	4.21495e+06	2.27942e+06	6.25709e+06	2.7697e+06	2.21435e+06	3.4018e+06	3.11532e+06	5129487	5541168	5.72318e+06	3.59455e+06	3.99644e+06	3.90782e+06	2.87125e+06	3.71372e+06	2738582	2707777	3088340	2945352	0.701411	0.00149534	0.0108973	0.937568	0.608156	0.705605	0.000178441	0.000527411
SP_0605	fba	15900513	fructose-bisphosphate aldolase (EC:4.1.2.13)	Cytoplasmic	293	31.4	5.1	71	880	23	High	0	191.496	2853.51	1.57986e+09	5.92248e+08	1.22117e+09	9.38372e+08	1.19433e+09	1.37776e+09	1.21403e+09	2.22968e+09	1.56622e+09	9.70045e+08	1.29866e+09	1.19025e+09	1078894592	1612467328	1326220800	1534357120	1209286144	1245223424	1682045440	1087431040	1544644224	1293401728	1136790016	1097955072	0.992852	0.997421	0.997679	0.817814	0.260549	0.364272	0.625949	0.652597
SP_0606	SP_0606	15900514	oxidoreductase	CytoplasmicMembrane	396	45.6	9.32	5	11	2	High	0.002	7.362	28.33	478434	130318	307458	564427	1.09371e+06	975019	2.56264e+06	5860230	3.32506e+06	2.29257e+06	2.70694e+06	2.99404e+06	377689	233148	322873	773172	1.10172e+06	911506	3.22974e+06	3484087	3.29176e+06	2.80718e+06	2465158	2.82309e+06	2.98422	0.00325069	0.0179635	0.809091	0.0128179	0.0399877	2.51386e-07	3.6888e-06
SP_0611	SP_0611	118090027	single-stranded-DNA-specific exonuclease RecJ	Cytoplasmic	740	82.4	4.73	24	49	14	High	0	52.363	133.69	2.29129e+07	8.4902e+06	1.61695e+07	1.00314e+07	1.63295e+07	1.61646e+07	1.13538e+07	2.6871e+07	1.50943e+07	1.63042e+07	1.77361e+07	1.87564e+07	16876264	18734008	17309350	14680550	16509625	14938594	14724798	15200623	14909296	20534078	15908882	17625248	0.871676	0.0462031	0.105426	1.20595	0.0717364	0.136824	0.0419268	0.0575267
SP_0613	SP_0613	15900521	metallo-beta-lactamase superfamily protein	Cytoplasmic	553	61.1	5.57	59	367	30	High	0	185.637	1291.58	2.47059e+08	7.88793e+07	1.66716e+08	1.40039e+08	1.90993e+08	2.18461e+08	1.49983e+08	3.43049e+08	1.95124e+08	1.71318e+08	2.37398e+08	2.34039e+08	174395472	194459360	180104928	218863216	193823296	198488880	201773408	178040112	192159072	222575792	209512944	217257184	1.11333	0.0954882	0.184336	1.13527	0.0340882	0.0798113	0.0248594	0.0368288
SP_0614	estA	15900522	tributyrin esterase	Unknown	259	29.9	6.14	29	25	6	High	0	24.595	71.61	1.1715e+07	1.99388e+06	6.96438e+06	1.8063e+06	4.79532e+06	4.73931e+06	4.48845e+06	1.05972e+07	7.02303e+06	3.07301e+06	2.79122e+06	4.23528e+06	8727289	4.08621e+06	7.41159e+06	2.55117e+06	4857164	4.39723e+06	5715018	6.17887e+06	6.93542e+06	3.77871e+06	2537464	3.99793e+06	0.583709	0.159796	0.265795	0.547769	0.0158439	0.0457756	0.0575422	0.0756305
SP_0615	murM,fibA	15900523	beta-lactam resistance factor	Cytoplasmic	406	47.4	8.28	31	100	14	High	0	61.223	237.65	2.90384e+07	9.96731e+06	2.12921e+07	1.21061e+07	2.06522e+07	2.0534e+07	1.19837e+07	3.01495e+07	1.64719e+07	1.04278e+07	1.57382e+07	1.59774e+07	21280926	22175862	22783414	17844306	20970120	18882050	15512301	16945204	16290506	13019848	14122060	15009586	0.871019	0.052488	0.115692	0.864681	0.0391351	0.0874389	9.10794e-05	0.000316948
SP_0616	murN,fibB	15900524	beta-lactam resistance factor	Cytoplasmic	410	47.3	6.98	23	96	12	High	0	50.978	239.43	5.56838e+07	1.64329e+07	4.00414e+07	2.95479e+07	4.08283e+07	4.90641e+07	2.14407e+07	6.07578e+07	2.44409e+07	2.04577e+07	3.31282e+07	3.15574e+07	40396544	37389620	42893592	44438260	41353820	45032328	27916800	33434674	24082918	25907468	29631692	29566240	1.08406	0.16271	0.269488	0.996149	0.976897	0.983605	0.00100679	0.00232783
SP_0617	SP_0617	15900525	hypothetical protein	Unknown	233	26.7	5.26	5	6	1	High	0.008	3.887	9.89	1719555	421731	911502	535201	859039	989163		3.00385e+06	1.26933e+06	937794	1.29526e+06	1.53447e+06	1.32807e+06	802357	963328	732496	868079	924530	na	1.82396e+06	1.25635e+06	1.13566e+06	1.18812e+06	1448329	0.816195	0.317625	0.429641	0.816392	0.340274	0.451007	0.0479431	0.0645698
SP_0618	uvrC	15900526	excinuclease ABC subunit C	Cytoplasmic	614	70.4	8.76	30	83	14	High	0	53.949	199.15	9.13053e+06	2.56291e+06	5.74366e+06	4.76161e+06	8.09008e+06	8.82769e+06	4.52202e+06	1.36498e+07	6.05981e+06	7.62225e+06	1.02718e+07	1.04183e+07	6840754	5.32272e+06	6.10774e+06	6865472	8189621	8166625	5753821	7.86197e+06	5.98766e+06	9498373	9289795	9772421	1.27095	0.0602889	0.128045	1.45692	0.017664	0.0493898	0.0063983	0.0111275
SP_0619	SP_0619	15900527	hypothetical protein	Cytoplasmic	277	31.5	4.77	23	18	5	High	0	18.468	50.42	6.95723e+06	1.87397e+06	5.31709e+06	4.78488e+06	7.26025e+06	8084591	4.581e+06	8.10795e+06	5.96312e+06	3.36165e+06	4.19039e+06	6.55208e+06	5240414	3827980	5.65911e+06	6.89502e+06	7348788	7476219	5.83139e+06	4769847	5.88893e+06	4.14085e+06	3.80085e+06	6165706	1.47479	0.0302079	0.0809709	0.855504	0.34755	0.454996	0.0538879	0.070983
SP_0622	SP_0622	15900530	nitroreductase	Cytoplasmic	201	22.7	6.81	51	178	11	High	0	83.1	706.44	1.90022e+08	5.87514e+07	1.40397e+08	8.85873e+07	1.25635e+08	1.40418e+08	1.20065e+08	2.30028e+08	1.4758e+08	1.04844e+08	1.32984e+08	1.39771e+08	134785280	142821232	150880032	137007856	127821416	127746496	160852768	120988112	145874544	135745888	118009656	130240800	0.916192	0.0952654	0.184211	0.897785	0.33296	0.44382	0.369251	0.402453
SP_0623	pepV	15900531	dipeptidase PepV	Cytoplasmic	466	50.8	4.94	42	355	21	High	0	160.342	1254.81	3.43754e+08	9.04044e+07	2.19618e+08	1.58646e+08	2.28959e+08	2.59203e+08	1.79191e+08	4.19263e+08	2.40822e+08	1.46431e+08	2.33712e+08	2.35166e+08	241437584	224311744	237524592	249321104	232417136	235621696	241454016	216041664	237450544	189618064	206877344	218182288	1.02003	0.556243	0.662491	0.884497	0.0829943	0.151323	0.0280589	0.0407026
SP_0624	SP_0624	15900532	hypothetical protein	Cytoplasmic	192	22.1	8.69	20	14	4	High	0	14.549	33.15	4.19069e+06	1.82712e+06	3.26937e+06	1.96495e+06	3.50181e+06	3.29887e+06	1.8917e+06	5.09665e+06	2.4477e+06	2.06219e+06	2.66608e+06	2.47539e+06	3.18376e+06	3.74208e+06	3471688	2.76784e+06	3540823	3.06679e+06	2.37309e+06	3046314	2422440	2.52152e+06	2429005	2343253	0.9017	0.280344	0.391005	0.930109	0.467848	0.571036	0.010599	0.0173281
SP_0626	brnQ	15900533	branched-chain amino acid transport system II carrier protein	CytoplasmicMembrane	441	46.6	8.87	13	35	5	High	0	23.76	109.14	2.06865e+07	9.58954e+06	2.11486e+07	1.65049e+06	744580	693199	4.81587e+07	1.02637e+08	6.587e+07	5.88363e+06	5.39752e+06	1.12861e+07	15282741	21289550	22568702	2.32053e+06	752791	648951	63687508	55653496	64994016	7.30309e+06	4890529	10614718	0.0629389	0.00223747	0.0139103	0.123733	0.000734533	0.00664689	1.35949e-05	7.00169e-05
SP_0627	SP_0627	15900534	conserved_hypothetical_protein	Cytoplasmic	345	38	5.45	42	106	14	High	0	79.886	340.17	1.03344e+08	3.17564e+07	7.91272e+07	55775234	7.90126e+07	8.54875e+07	3.99488e+07	8.07695e+07	5.32898e+07	3.67522e+07	6.15614e+07	5.67939e+07	73878224	74920536	85053328	85341912	80113216	78204608	52563820	44013332	52575884	46887052	54926852	53024472	1.04194	0.458831	0.575266	1.03812	0.639364	0.730713	7.90298e-05	0.000280888
SP_0628	SP_0628	15900535	HIT family protein	Cytoplasmic	156	18.2	6.52	10	14	2	High	0	11.451	43.47	29839.8	1.09778e+06	35806.7	1.27093e+06	881976	2.94947e+06		1.41182e+06	359740	290493	294430	160018	24753.2	2.19325e+06	37329.6	1.775e+06	891342	2.74302e+06	na	879129	356476	345425	271263	152782	2.39848	0.156602	0.260855	0.415165	0.166367	0.255137	0.225688	0.256464
SP_0629	dacB	15900536	L,D-Carboxypeptidase	Unknown	238	26.4	5.41	56	161	11	High	0	74.944	505.67	5.80906e+07	2.15805e+07	3.95776e+07	4.06315e+07	5.75908e+07	6.21705e+07	2.85467e+07	7.78955e+07	3.84465e+07	4.71719e+07	5.7667e+07	5.05227e+07	42105156	49922416	42462916	61626128	58397356	56981200	37347196	42485344	37887836	60346096	51470720	47164576	1.31611	0.00989997	0.0372822	1.3505	0.0231131	0.0606524	0.00223897	0.00453079
SP_0630	rplK	15900537	5S ribosomal protein L11	Cytoplasmic	141	14.8	9.7	69	471	11	High	0	122.249	1426.09	1.09045e+09	3.72011e+08	7.95656e+08	6.00802e+08	9.06919e+08	9.39634e+08	8.53447e+08	1.75108e+09	1.08941e+09	8.97288e+08	1.1096e+09	1189511252	749295040	990156160	863829568	972729920	921510784	849788416	1179265024	860299072	1072700480	1194763520	971626240	1097955072	1.05407	0.55517	0.662491	1.04886	0.659986	0.745915	0.167667	0.195955
SP_0631	rplA	15900538	5S ribosomal protein L1	Cytoplasmic	229	24.5	9.23	73	771	21	High	0	123.041	2161.34	1.75191e+09	5.28149e+08	1.3223e+09	1.12613e+09	1.61629e+09	1.68192e+09	1.26801e+09	2.66012e+09	1.64529e+09	1.32331e+09	1.91949e+09	1.74385e+09	1192781696	1430007424	1435371392	1856642304	1646650240	1514469888	1766800896	1289507968	1623288832	1767654656	1674769920	1603069056	1.23646	0.0668872	0.139955	1.07819	0.445131	0.553113	0.135948	0.162165
SP_0636	SP_0636	15900542	ABC transporter ATP-binding protein	CytoplasmicMembrane	330	37.7	5.63	55	161	24	High	0	117.001	461.07	1.59449e+08	4.35563e+07	1.04563e+08	7.03505e+07	1.00434e+08	1.07254e+08	1.00963e+07	2.13477e+07	1.20384e+07	1.31355e+07	1.59549e+07	1.70803e+07	113156736	104342040	113030328	108269432	101427560	97762840	13020820	12130295	11850513	16452750	14390182	16037363	0.930205	0.145118	0.247941	1.26698	0.00912118	0.0318427	3.62969e-11	2.10943e-08
SP_0637	SP_0637	15900543	hypothetical protein	CytoplasmicMembrane	272	30.8	9.39	10	18	2	High	0	15.895	61.85	7.03378e+06	2.2162e+06	4.55209e+06	3.05063e+06	4.28608e+06	4.73978e+06	1.45622e+07	3.58536e+07	2.05739e+07	1.61347e+07	2.06574e+07	2.26127e+07	5292164	4583293	4837010	4352699	4.34071e+06	4.39723e+06	18931706	20091920	20334958	20278594	18586678	21172856	0.889765	0.0524099	0.115692	1.01145	0.825497	0.87709	3.61813e-10	3.94705e-08
SP_0638	SP_0638	15900544	hypothetical protein	CytoplasmicMembrane	261	30.2	8.76	13	12	3	High	0	11.24	31.24	7.36188e+06	2.16113e+06	4.87238e+06	2.76741e+06	3.70664e+06	4.7726e+06			53660.3		40969.5	75463	5.53601e+06	4.45336e+06	5.1786e+06	3.94405e+06	3.75344e+06	4.42493e+06	na	na	53252.2	na	38308.6	72302.9	0.799211	0.051113	0.113865	1.03856	na	na	5.76774e-06	3.71193e-05
SP_0641	prtA	15900547	serine protease	Cellwall	2140	240.3	6.34	57	541	114	High	0	623.061	1567.51	4.67205e+07	2.26108e+07	3.38855e+07	2.71504e+08	4.09492e+08	4.67345e+08	1.65378e+07	6.15751e+07	2.24568e+07	1.6221e+08	2.32571e+08	2.51974e+08	33976936	52351060	36328336	432001888	415286784	423626080	21436758	33859848	22208976	210702384	205999264	233902960	10.3616	6.28915e-05	0.00244438	8.39429	0.000145265	0.00321502	1.25061e-07	2.20696e-06
SP_0645	gatA	15900548	PTS system transporter subunit IIA	Cytoplasmic	158	17.9	4.54	17	4	3	High	0.002	7.539	3.86	560042	279037	447868	367584	445437	556276	69914.6	320818	133333	116529	156253	159533	441221	519691	471874	499378	449475	521219	83325.4	210273	131799	137613	144520	152782	1.02602	0.708122	0.787853	1.02238	0.750836	0.817762	0.000148869	0.000458059
SP_0646	gatB	15900549	PTS system transporter subunit IIB	Cytoplasmic	101	10.8	4.7	32	10	2	High	0.002	9.446	33.92	17468737	6.39426e+06	1.11172e+07	11592418	1.46182e+07	1.72219e+07	2.95068e+06	8.112e+06	3.22666e+06	3.00194e+06	5.60637e+06	4541640	12959334	13902797	11842240	17089766	14786540	15856113	3.73011e+06	4769847	3.19299e+06	3.69136e+06	5.07948e+06	4279673	1.23326	0.028239	0.076752	1.1161	0.482451	0.586441	2.36951e-06	1.9343e-05
SP_0647	gatC	15900550	PTS system transporter subunit IIC	CytoplasmicMembrane	491	53	9	13	15	3	High	0	13.263	57.78	7.91041e+06	1.44997e+06	4486314	3.79472e+06	5.42663e+06	7.59786e+06	738503	2.28768e+06	1.0201e+06	1.94635e+06	1.9215e+06	2.28017e+06	5.942e+06	2.931e+06	4772959	5436831	5.49518e+06	7.03418e+06	914269	1.40489e+06	1.00921e+06	2.38506e+06	1.75039e+06	2.15498e+06	1.31659	0.241686	0.354167	1.88995	0.0152128	0.0446116	9.82455e-05	0.000332376
SP_0648	bgaA	15900551	beta-galactosidase	Cellwall	2233	247.1	6.13	19	117	34	High	0	133.495	280.55	2.39208e+07	7.20735e+06	1.57104e+07	1.48357e+07	1.8747e+07	2.81924e+07	3.1484e+06	1.11145e+07	5.18733e+06	5.13231e+06	8.53329e+06	1.03786e+07	17599644	15781118	16772984	21931112	18942538	25933850	3.98711e+06	6460385	5.12866e+06	6.3595e+06	7.70267e+06	9772421	1.33205	0.0437386	0.101795	1.5302	0.0830793	0.151323	3.21696e-05	0.000136408
SP_0655	SP_0655	118090028	sodium/hydrogen exchanger family protein	CytoplasmicMembrane	684	77.7	6.43	7	12	3	High	0	13.297	32.43	1.69847e+06	479393	740056	209887	920934	611849	1.60378e+06	4.22916e+06	1.95883e+06	1.61932e+06	2.75009e+06	2.95212e+06	1.3129e+06	916476	780998	281188	930784	573447	2.00371e+06	2.54247e+06	1.93829e+06	1.97633e+06	2.50131e+06	2.78547e+06	0.593089	0.182922	0.290705	1.12008	0.450081	0.557492	0.00224739	0.0045329
SP_0659	etrx1	15900560	surface-exposed thioredoxin-family lipoprotein 1	Cellwall	188	20.8	7.25	36	12	5	High	0	17.496	22.37	3.42478e+06	969375	1.94206e+06	1.31053e+06	2.50972e+06	2.28107e+06	2.32703e+06	6.66736e+06	3.58787e+06	1.92682e+06	4.14441e+06	4.53522e+06	2.6082e+06	1.91994e+06	2.05537e+06	1.83226e+06	2.53863e+06	2.1227e+06	2935215	3.94859e+06	3.54857e+06	2.36026e+06	3.75578e+06	4279673	0.986342	0.921691	0.949867	0.996485	0.899616	0.930556	0.033744	0.0478074
SP_0660	msrAB2	15900561	bifunctional methionine sulfoxide reductase A/B	Unknown	370	41.9	5.53	31	67	9	High	0	45.248	143.17	1.13151e+07	3.34359e+06	7.80804e+06	1.27465e+07	1.71357e+07	1.7849e+07	1.07333e+07	2.32278e+07	1.55905e+07	1.16805e+07	1.48464e+07	1.37476e+07	8434202	7.03673e+06	8320553	18750820	17320568	16406480	13806870	13174721	15402580	14671365	13317568	12859606	2.20574	0.000345998	0.00507716	0.963769	0.582525	0.683301	1.26706e-05	6.69811e-05
SP_0661	rr9	15900562	DNA-binding response regulator	Cytoplasmic	245	28.2	5.3	31	48	7	High	0	29.193	144.64	1.10953e+07	3.0403e+06	5.23242e+06	4.14923e+06	5.91154e+06	6.33305e+06	1.23945e+07	2.49141e+07	1.39032e+07	7.98332e+06	1.0552e+07	1.02324e+07	8287593	6.37485e+06	5.56298e+06	5966146	5981343	5863971	16037680	14106795	13725297	9953511	9558612	9585201	0.880647	0.388496	0.502759	0.663266	0.00119822	0.0088809	3.35899e-05	0.000141431
SP_0662	hk9	15900563	sensor histidine kinase	CytoplasmicMembrane	563	63.6	6.49	26	30	10	High	0	40.681	87.68	4.87116e+06	1.45766e+06	3.28422e+06	2.5913e+06	4.31621e+06	3.25269e+06	7.47874e+06	1.78878e+07	7.91271e+06	7.05519e+06	9.85118e+06	8.97116e+06	3.69044e+06	2952219	3.48235e+06	3.68186e+06	4.37109e+06	3020542	9597628	10253314	7.81398e+06	8790983	8886475	8433507	1.09368	0.547758	0.656409	0.943829	0.569925	0.671882	1.42054e-05	7.19262e-05
SP_0663	SP_0663	15900564	hypothetical protein	Cytoplasmic	187	20.3	6.74	20	26	4	High	0	11.245	48.9	1.15573e+07	3.70883e+06	7.72619e+06	5.66286e+06	7.37323e+06	8.1448e+06	7.45868e+06	1.39308e+07	9.85706e+06	5.20031e+06	6.87445e+06	6.53214e+06	8654045	7857082	8234984	8.1973e+06	7.46023e+06	7.53146e+06	9571582	8.02954e+06	9738659	6447481	6212260	6146962	0.937076	0.1868	0.295134	0.687888	0.00425107	0.0193276	0.000733718	0.00175042
SP_0664	zmpB	15900565	zinc metalloprotease ZmpB	Cellwall	1906	213.4	5.25	26	153	40	High	0	192.852	405.96	95119994	3.428e+07	7.05575e+07	4.06528e+07	8.065e+07	6.49344e+07	1.16251e+07	2.53808e+07	1.72614e+07	9.14532e+06	1.17474e+07	1.41632e+07	68310048	81114256	75878856	61781544	81838592	59442420	14987239	14380500	17079692	11434610	10543898	13327120	0.901286	0.376174	0.48953	0.76012	0.0325529	0.0766758	9.66973e-08	1.81307e-06
SP_0665	SP_0665	15900566	chorismate binding protein	Cytoplasmic	573	65.8	5.41	25	94	13	High	0	64.379	234.52	1.75211e+07	6.00196e+06	1.21801e+07	8.19174e+06	1.19723e+07	1.30175e+07	9.79851e+06	2.39422e+07	1.46241e+07	1.26209e+07	1.6881e+07	1.55719e+07	12959334	13013545	13020720	11966343	12151463	12000671	12628069	13558769	14415974	15816209	15194299	14635744	0.926267	0.000101157	0.00305571	1.12421	0.0562355	0.11472	0.0005279	0.00130884
SP_0666	SP_0666	15900567	hypothetical protein	CytoplasmicMembrane	205	22.9	7.96	13	18	2	High	0.003	7.172	28.91	2.55182e+06	477467	1.53594e+06	1.31385e+06	1.45035e+06	2.29741e+06	234935	661689	327001	481049	566404	444394	1.95502e+06	912458	1.63008e+06	1.83226e+06	1.46591e+06	2.14122e+06	285536	423299	323823	576974	520043	422307	1.20941	0.422595	0.53676	1.47127	0.0571928	0.115867	0.000109098	0.000359662
SP_0667	cbpL	15900568	choline-binding protein	Unknown	332	37.6	6.7	29	35	7	High	0	37.655	103.88	357776	259544	260902	561805	859001	777814	5.68674e+06	1.67344e+07	8.88894e+06	8.17037e+06	8.4653e+06	1.27894e+07	284349	482608	274317	770366	868079	728138	7.26949e+06	9588127	8781288	10193810	7.64885e+06	12017983	2.27278	0.0108621	0.0397027	1.16466	0.412214	0.521042	8.66285e-08	1.70417e-06
SP_0668	gki	194172858	glucokinase	Cytoplasmic	319	33.4	5.02	57	179	17	High	0	109.401	678.98	2.00368e+08	6.50953e+07	1.4603e+08	9.15784e+07	1.16857e+08	1.44864e+08	1.15179e+08	2.31245e+08	1.41403e+08	9.54177e+07	1.2441e+08	1.22501e+08	141748928	158924192	157372544	141759200	118684296	132286424	154046768	121496360	138980496	123170456	110073608	114482648	0.857403	0.0704665	0.14646	0.838859	0.0868402	0.156472	0.0259343	0.0381386
SP_0669	thyA	15900570	thymidylate synthase (EC:2.1.1.45)	Cytoplasmic	279	32.5	5.55	30	78	9	High	0	46.369	251.1	2.9428e+07	8.25118e+06	1.8669e+07	1.18278e+07	1.85312e+07	2.27702e+07	1.82562e+07	4.7143e+07	2.43196e+07	1.45234e+07	2.0977e+07	2.2523e+07	21569182	18178546	19991972	17391476	18739748	20989630	23814034	26122462	23984306	18236760	18854310	21079494	0.956162	0.571403	0.675715	0.786931	0.0104477	0.034802	0.0122517	0.0197078
SP_0670	SP_0670	15900571	hypothetical_protein	CytoplasmicMembrane	56	6	10.51	73	113	8	High	0	52.579	343.03	2.75727e+08	8.54963e+07	1.92923e+08	1.86468e+08	2.03794e+08	2.62454e+08	1.83083e+08	3.27138e+08	2.72622e+08	1.51823e+08	2.14067e+08	2.0558e+08	194481568	211567056	208264816	292749696	207025952	238337568	246935680	170005152	268953376	197521440	189303952	191355232	1.20153	0.169104	0.27577	0.842959	0.342817	0.451825	0.318356	0.350483
SP_0671	miaA	15900572	tRNA delta(2)-isopentenylpyrophosphate transferase (EC:2.5.1.75)	Cytoplasmic	294	33.3	5.14	35	46	9	High	0	37.301	107.22	1.04994e+07	3.20934e+06	7.56419e+06	5.15973e+06	7.61027e+06	8.23865e+06	4.57774e+06	1.18041e+07	6.36548e+06	5.61141e+06	8.15698e+06	7.55672e+06	7847469	6749540	8053159	7456708	7.70335e+06	7623526	5.83139e+06	6853798	6293725	6963190	7370646	7.11253e+06	1.00589	0.883052	0.924271	1.13001	0.0662944	0.129822	0.0277087	0.0403036
SP_0672	SP_0672	15900573	GTP-binding protein HflX	Cytoplasmic	412	46.7	5.25	40	75	14	High	0	59.545	175.41	2.24154e+07	8.14352e+06	1.51103e+07	1.14752e+07	1.45038e+07	15603224	1.98241e+07	40929067	2.36299e+07	1.77046e+07	2.45981e+07	2.22819e+07	16514338	17924244	16129489	16938954	14685161	14387986	25798072	22790870	23293906	22323316	22064094	20892808	0.909904	0.187418	0.295636	0.908147	0.0926345	0.162261	8.34434e-05	0.000295375
SP_0673	SP_0673	15900574	hypothetical protein	Cytoplasmic	207	23.7	4.73	19	14	6	High	0	25.922	46.26	3.38661e+06	1.33895e+06	3.85625e+06	3.16155e+06	5.00063e+06	4.81392e+06	1.91433e+06	6.88538e+06	3.15039e+06	3.57564e+06	4.98569e+06	5.57578e+06	2585731	2.69807e+06	4.10079e+06	4513484	5.05971e+06	4461857	2.3986e+06	4074408	3113962	4.41586e+06	4.52149e+06	5.25587e+06	1.49554	0.0500229	0.112167	1.48047	0.0639136	0.12579	0.0355666	0.0502116
SP_0674	SP_0674	15900575	ribonuclease Z (EC:3.1.26.11)	Cytoplasmic	309	34.1	6.76	50	111	14	High	0	72.009	283.91	3.21252e+07	9.80677e+06	2.23251e+07	2.39985e+07	3.62049e+07	3.86574e+07	1.82619e+07	4.21869e+07	2.31796e+07	2.54482e+07	4.0498e+07	4.01928e+07	23512758	21802472	23857476	35975820	36688012	35535196	23814034	23490798	22899404	32195794	36209588	37577864	1.56419	0.000108456	0.00305571	1.50964	0.00103118	0.00824304	2.95864e-06	2.27587e-05
SP_0675	SP_0675	15900576	short chain dehydrogenase/reductase family oxidoreductase	Cytoplasmic	251	27.8	7.59	20	23	4	High	0	16.941	74.51	9.68544e+06	2.7e+06	6.12357e+06	3286606	5.26699e+06	5.38385e+06	4.54634e+06	1.38217e+07	5.8078e+06	4.71024e+06	7.67476e+06	7.3557e+06	7252567	5628664	6513732	4.70367e+06	5333141	4987875	5792614	7.9737e+06	5.74083e+06	5831893	6930781	6.92508e+06	0.77467	0.0373993	0.0943648	1.00926	0.889907	0.924473	0.0920226	0.114551
SP_0676	SP_0676	15900577	transcriptional regulator	Cytoplasmic	302	34.9	5.64	32	71	9	High	0	42.892	223.09	3.11587e+07	1.14278e+07	2.33608e+07	1.74595e+07	2.64677e+07	27409784	1.27514e+07	3.58612e+07	1.54784e+07	1.49894e+07	1.93044e+07	1.40155e+07	22865210	25525728	25039154	26035818	26850874	25201716	16563295	20091920	15303915	18874546	17337368	13140151	1.06344	0.181402	0.28935	0.949825	0.699494	0.777161	0.00285071	0.00553536
SP_0678	SP_0678	15900579	hypothetical protein	CytoplasmicMembrane	126	14.6	10.05	65	160	11	High	0	55.571	444.76	1.03984e+08	3.0693e+07	6.72312e+07	5.12167e+07	7.55034e+07	8.1861e+07	4.90477e+07	1.34874e+08	6.78187e+07	4.71475e+07	6.92837e+07	7.18406e+07	74582560	72202776	72210544	78146328	76561224	74927696	64761368	72288440	66866512	60216636	61746144	66966800	1.04858	0.0433174	0.101422	0.926505	0.170797	0.260527	0.00220439	0.00447592
SP_0681	SP_0681	15900582	elongation factor Tu family protein	CytoplasmicMembrane	613	68.2	4.91	58	586	37	High	0	276.279	1945.99	5.29497e+08	1.67122e+08	3.73018e+08	304604931	4.05743e+08	4.59481e+08	3.88209e+08	8.71384e+08	5.10702e+08	4.19316e+08	5.41202e+08	5.01911e+08	368413632	427190816	403561152	485736128	412239392	416404512	529790208	438265184	503181888	552215168	475737312	464715040	1.09608	0.255331	0.366195	1.01457	0.860557	0.906799	0.0553276	0.0727995
SP_0689	murG	15900590	undecaprenyldiphospho-muramoylpentapeptide beta-N-acetylglucosaminyltransferase (EC:2.4.1.227)	CytoplasmicMembrane	352	39.4	7.12	53	137	13	High	0	87.24	453.08	5.05312e+07	1.84751e+07	3.47035e+07	2.65863e+07	3.45247e+07	2.7913e+07	1.78677e+07	5.44347e+07	2.40032e+07	2.35386e+07	3.41447e+07	3.51076e+07	36689824	42430196	37189044	39971144	34963880	25659368	23285392	30026436	23688442	29755320	30521126	32827674	0.864889	0.31534	0.427542	1.20914	0.0878535	0.157537	0.0414204	0.057066
SP_0690	ftsQ,divIB	15900591	cell division protein DivIB	Cellwall	399	45.8	4.91	23	46	6	High	0	37.786	155.07	7.76955e+06	3.24821e+06	5.25168e+06	4.07079e+06	5.62724e+06	6.49313e+06	4.80194e+06	9.7809e+06	6.75875e+06	7.13821e+06	8.78265e+06	8.4796e+06	5838697	6.83784e+06	5584343	5.8484e+06	5.69774e+06	6.01146e+06	6116028	5716223	6.67874e+06	8891999	7.92697e+06	7.97455e+06	0.961487	0.603401	0.698828	1.33939	0.00746517	0.0283386	0.00166179	0.00354832
SP_0701	SP_0701	15900600	orotidine 5'-phosphate decarboxylase (EC:4.1.1.23)	Cytoplasmic	233	25.4	5.27	14	13	2	High	0.002	9.074	37.16	4.65617e+06	685427	2.44719e+06	1.70677e+06	2.79714e+06	3.69293e+06	206855	1.59886e+06	365501	1.44394e+06	1.69838e+06	2.17297e+06	3.53411e+06	1.33408e+06	2598119	2.40696e+06	2832164	3427353	251013	993397	362412	1.75386e+06	1.55103e+06	2.0514e+06	1.16074	0.519472	0.630941	3.33346	0.0305235	0.0730694	0.00397264	0.00733764
SP_0702	pyrE	15900601	orotate phosphoribosyltransferase (EC:2.4.2.1)	Cytoplasmic	210	22.8	5.08	50	106	9	High	0	59.16	361.19	4.16072e+07	1.30662e+07	3.15006e+07	2.88444e+07	4.38623e+07	4.34131e+07	2.27292e+07	5.46834e+07	3.25817e+07	3.1039e+07	3.72047e+07	4.34802e+07	30329410	29535094	33746540	43359000	44498560	39828460	29640186	30186490	32169258	39403112	33277194	40650244	1.36401	0.00413491	0.0208714	1.23191	0.0373546	0.0842633	0.00164464	0.00352423
SP_0707	SP_0707	15900606	ABC transporter ATP-binding protein	CytoplasmicMembrane	215	23.8	7.66	21	17	4	High	0	12.333	23.43	4.26104e+06	1.34258e+06	2.8707e+06	2.16902e+06	2.98471e+06	3.37436e+06	2.2433e+06	5.31539e+06	2.85013e+06	2.40343e+06	2.73434e+06	3.11748e+06	3235981	2.69807e+06	3045431	3.07183e+06	3.01438e+06	3.13152e+06	2.82009e+06	3173251	2.81761e+06	2.94394e+06	2.48324e+06	2945352	1.02653	0.624463	0.714548	0.950241	0.489196	0.59341	0.483853	0.513372
SP_0713	lysS	255964979	lysyl-tRNA synthetase (EC:6.1.1.6)	Cytoplasmic	496	56.7	5.49	54	375	37	High	0	196.377	1069.89	3.76606e+08	1.18327e+08	2.54679e+08	1.74248e+08	2.38198e+08	2.53013e+08	2.1282e+08	4.63812e+08	2.77327e+08	1.67057e+08	2.56949e+08	2.56602e+08	264161936	296691648	275474624	273427968	241558496	230189920	288105056	238431792	272891712	217298208	227076192	238526048	0.89101	0.130078	0.232069	0.854236	0.067664	0.13167	0.0506969	0.067446
SP_0715	lctO	15900612	lactate oxidase	Cytoplasmic	378	41.5	6.16	63	423	20	High	0	176.808	1495.57	4.4943e+08	1.28253e+08	2.98054e+08	1.42688e+08	2.0151e+08	2.38954e+08	2.69543e+08	5.99623e+08	3.53761e+08	1.72146e+08	2.48633e+08	2.38156e+08	313624096	323136544	322128384	223665936	204993872	217512096	366569664	305683104	348682304	223895424	220052080	220957072	0.673876	0.000134123	0.0031292	0.65127	0.00143842	0.00986705	7.28137e-06	4.43795e-05
SP_0716	SP_0716	15900613	transcriptional regulator	Unknown	222	25.6	4.92	21	11	4	High	0	23.032	25.87	6.93588e+06	320762	821604	130026	2.70196e+06	3.35922e+06	3.44217e+06	5.58691e+06	4.27638e+06	323862	2166440	2.54942e+06	5.22563e+06	602098	867902	172092	2.73095e+06	3.12227e+06	4.36021e+06	3.32879e+06	4230042	386518	1.97675e+06	2409130	0.899886	0.86666	0.911204	0.400401	0.116805	0.192704	0.525731	0.553887
SP_0717	SP_0717	15900614	hydroxyethylthiazole kinase (EC:2.7.1.5)	Unknown	260	27.6	5.15	11	20	3	High	0	16.649	71.37	60392108	1.57016e+07	3.52899e+07	1.77324e+07	3.34857e+07	3.18112e+07	2.27461e+07	5.58319e+07	3.20589e+07	1.53023e+07	3.11046e+07	2.72979e+07	43741288	35716416	37834752	26340514	33949676	29227470	29640186	30773056	31676222	19257304	27852292	25557304	0.7632	0.0460389	0.105405	0.78909	0.0929575	0.162261	0.0112622	0.0182878
SP_0722	SP_0722	15900619	transcriptional activator TenA	Cytoplasmic	230	27.3	5.14	22	6	4	High	0	14.225	11.17	1.68733e+06	374166	1.09682e+06	452849	666293	845905	803646	884784	1.04728e+06	628927	766761	799465	1.30531e+06	706848	1.16278e+06	617773	672907	791456	996010	560436	1038865	757324	703356	758243	0.655802	0.122501	0.22214	0.854974	0.580256	0.68152	0.292821	0.323559
SP_0723	SP_0723	15900620	hypothetical protein	CytoplasmicMembrane	174	19.2	10.05	11	6	2	High	0.003	6.604	10.46	1.00866e+06	412744	687423	279613	538384	517927	635715	1.44081e+06	710420	506421	623507	659966	787366	784406	724847	377495	543492	485765	784985	897204	702682	607390	572978	626795	0.612532	0.0107575	0.0394441	0.757761	0.0223106	0.0588098	0.00164129	0.00352333
SP_0726	thiD	15900623	phosphomethylpyrimidine kinase (EC:2.7.4.7)	Cytoplasmic	263	28.3	6.43	50	102	13	High	0	68.1	259.3	3.29247e+07	8.96244e+06	2.1818e+07	8.644e+06	1.14068e+07	1.18229e+07	2.86191e+07	6.31714e+07	3.64371e+07	1.48299e+07	2.37037e+07	1.89481e+07	24088048	19824016	23320444	12639930	11543446	10898049	37480332	34709600	35916068	18619398	21261986	17718616	0.521793	0.000939442	0.00855773	0.53281	0.000423946	0.0053472	1.28059e-06	1.18209e-05
SP_0727	SP_0727	15900624	transcriptional repressor	Unknown	131	15.1	5.21	21	16	2	High	0	9.695	52.68	1.29282e+06	402227	795878	504276	570430	733259	624937	1.89013e+06	906034	736254	898595	927779	1.00122e+06	762492	840346	689073	575842	686221	771196	1.16695e+06	896493	888092	823568	880156	0.749266	0.0450966	0.104124	0.914339	0.574817	0.676289	0.0497591	0.0664192
SP_0728	SP_0728	15900625	hypothetical protein	Cytoplasmic	123	13.8	5.91	13	4	1	High	0.002	4.81	9.8	921053	153592	689886	288434	594778	871404	677163	1.71719e+06	928984	695389	721430	933636	719178	278521	728025	388541	601119	814727	836412	1.06533e+06	919235	837949	661436	885825	1.04558	0.82866	0.880782	0.845527	0.208565	0.306678	0.224381	0.25522
SP_0729	SP_0729	15900626	cation transporter E1-E2 family ATPase	CytoplasmicMembrane	747	80.5	5.99	14	46	8	High	0	29.29	92.72	3.88537e+07	1.76284e+07	3.64768e+07	3.84396e+07	5.71616e+07	5.38768e+07	2.1081e+07	4.07308e+07	3.38385e+07	1.90706e+07	3.24531e+07	2.38278e+07	28395246	40266356	39126168	58209472	57991560	49412052	27519408	22683150	33352472	24114404	29097920	22292626	1.53647	0.0242472	0.0682903	0.903655	0.523492	0.629801	0.00131052	0.00289618
SP_0730	spxB	15900627	pyruvate oxidase	CytoplasmicMembrane	591	65.2	5.17	67	1502	47	High	0	479.456	5906.22	5.45604e+09	1.76557e+09	3.88968e+09	1.40903e+09	2.08687e+09	2.41032e+09	2.98049e+09	6.03609e+09	3.73827e+09	1.76542e+09	2.46232e+09	2.26379e+09	3645980160	5090231296	4248296704	2328943104	2124805376	2168715776	4201787392	2849033728	3677136896	2379950080	2142407552	2080052224	0.510028	0.0026957	0.0156583	0.61544	0.0172779	0.0489541	0.000587362	0.00143551
SP_0731	SP_0731	15900628	hypothetical protein	Unknown	115	12.9	4.98	31	12	2	High	0.002	8.118	31.92	4724414	1236384	3.73385e+06	1.20096e+06	1.65527e+06	1.53752e+06	2.09997e+06	3953274	2.54539e+06	705263	1.47705e+06	1.28614e+06	3578790	2.48713e+06	3.96214e+06	1.6749e+06	1.6784e+06	1.4365e+06	2.64115e+06	2379600	2.52124e+06	850178	1.3515e+06	1.22194e+06	0.47764	0.00863824	0.034143	0.453942	0.00495323	0.0216515	0.000378104	0.000996452
SP_0736	SP_0736	15900631	mannose-6-phosphate isomerase	Cytoplasmic	314	35.2	4.87	54	131	12	High	0	76.733	403.83	5.23558e+07	3.92981e+07	3.88381e+07	2.25977e+07	3.45039e+07	3.39268e+07	4.23825e+07	1.1535e+08	5.89075e+07	3.58411e+07	4.86493e+07	5.34239e+07	38044864	93568448	41601700	33828784	34963880	31147862	55910856	61909336	58095440	45595524	43400864	49862324	0.576974	0.183	0.290705	0.789348	0.00920315	0.0318445	0.106205	0.13058
SP_0739	SP_0739	15900634	MerR family transcriptional regulator	Cytoplasmic	246	28.3	5.64	9	8	2	High	0.002	8.533	25.87	4489128	1.55526e+06	3.03352e+06	2.17951e+06	2.73633e+06	2.64864e+06						57671.3	3.40746e+06	3.16481e+06	3.2159e+06	3.08633e+06	2.77143e+06	2465361	na	na	na	na	na	55313.9	0.850325	0.0730829	0.150026	na	na	na	0.0730833	0.0928041
SP_0740	SP_0740	15900635	MutT/nudix family protein	Cytoplasmic	151	17.9	4.73	7	2	1	High	0.007	3.997	5.03	782912	264059	509677	290801	498195	479957			47482.6		40048.3		613208	490405	537456	392685	503052	450297	na	na	47108.3	na	37380.1	na	0.820218	0.108462	0.202024	0.793493	na	na	0.108461	0.132809
SP_0741	SP_0741	15900636	conserved_hypothetical_protein	Unknown	391	42.6	7.94	36	102	13	High	0	62.44	296.94	1.93696e+07	5.8479e+06	1.17228e+07	9.70339e+06	1.59371e+07	1.8103e+07	1.08907e+07	2.83072e+07	1.57478e+07	1.25615e+07	2.02506e+07	2.06722e+07	14339695	12672279	12484980	14229844	16104185	16681614	14069038	15964718	15501234	15816209	18229774	19399404	1.19036	0.055944	0.120798	1.17372	0.0915734	0.161723	0.0152919	0.0239873
SP_0742	SP_0742	15900637	hypothetical protein	Cytoplasmic	281	30.6	4.97	44	182	12	High	0	71.435	570.81	1.91429e+08	4.23139e+07	9.00815e+07	1.01868e+08	181093730	2.05077e+08	9.45205e+07	1.21207e+08	1.34116e+08	1.37883e+08	1.73348e+08	1.86005e+08	135482624	101078920	96931192	158259712	183667920	186709664	126195448	65028848	132086136	179087824	153243776	172844528	1.58515	0.0163025	0.0525104	1.56251	0.103103	0.175529	0.0382481	0.0533074
SP_0743	SP_0743	15900638	TetR family transcriptional regulator	Cytoplasmic	185	21.7	9.36	26	17	5	High	0	19.243	35.48	4.84212e+06	1.59457e+06	3.39945e+06	2.26273e+06	3.01291e+06	3.79276e+06	2.77803e+06	6.3606e+06	4.26333e+06	3.04902e+06	3.61314e+06	3.57753e+06	3.66812e+06	3.22872e+06	3.61027e+06	3.20233e+06	3044749	3.51978e+06	3.51186e+06	3771054	4210289	3.75375e+06	3.27783e+06	3377816	0.929547	0.278236	0.389521	0.9057	0.216916	0.315686	0.160418	0.188543
SP_0744	SP_0744	15900639	cytidine and deoxycytidylate deaminase	Cytoplasmic	155	17.4	7.37	42	81	7	High	0	39.011	272.15	2.56867e+07	7.45213e+06	1.80114e+07	1.27575e+07	1.73072e+07	1.93564e+07	1.29565e+07	2.84613e+07	1.71967e+07	1.10792e+07	1.67126e+07	1.62871e+07	18900426	16332933	19240672	18901942	17523270	17873718	16826216	16073748	16981058	13908797	15015652	15289890	0.996786	0.985579	0.992387	0.886396	0.0226933	0.0596845	0.00652583	0.0113328
SP_0745	upp	15900640	uracil phosphoribosyltransferase (EC:2.4.2.9)	Cytoplasmic	209	22.9	5.64	76	306	14	High	0	131.142	1252.81	3.43412e+08	1.0217e+08	2.35147e+08	1.49066e+08	2.04191e+08	2.29791e+08	1.83499e+08	4.73768e+08	2.55362e+08	1.71219e+08	2.16818e+08	2.1525e+08	240748800	254615440	253785952	233279216	207025952	209360720	246935680	243397072	251233104	222575792	191940624	199681920	0.867204	0.0271331	0.0745658	0.828245	0.013579	0.0416853	0.0040173	0.0073938
SP_0746	clpP	15900641	ATP-dependent Clp protease proteolytic subunit (EC:3.4.21.92)	Cytoplasmic	196	21.3	4.88	40	146	4	High	0	26.184	311.43	1.79116e+08	5.26206e+07	1.17618e+08	8.30197e+07	1.12261e+08	1.31296e+08	9.78718e+07	2.54153e+08	1.30173e+08	7.95396e+07	1.1089e+08	1.04251e+08	127118832	127057720	127083664	128148552	113608384	119572936	130808880	133171296	128146296	102382176	98603256	96861080	0.947725	0.190713	0.298485	0.759567	0.000154238	0.00335039	4.33226e-05	0.000176067
SP_0748	SP_0748	15900643	hypothetical protein	Cytoplasmic	82	9.9	9.5	37	15	3	High	0	16.344	50.82	5.74961e+06	2.03219e+06	4.13782e+06	5.18043e+06	5.52416e+06	2242443	3.44857e+06	6917398	1.14675e+06	4.24252e+06	975525	6.07171e+06	4.34429e+06	4172466	4399478	7.48631e+06	5586330	2.08564e+06	4.37309e+06	4.09156e+06	1.13773e+06	5242290	893638	5715545	1.17358	0.942162	0.965343	1.23422	0.908527	0.935802	0.791641	0.811246
SP_0749	SP_0749	15900644	branched-chain amino acid ABC transporter substrate-binding protein	Unknown	386	40.4	5.4	80	450	26	High	0	226.655	1883.74	3.16871e+08	9.89019e+07	2.05425e+08	2.93069e+08	4.14841e+08	4.87553e+08	1.01947e+08	254972579	1.32646e+08	2.85596e+08	3.94583e+08	3.94006e+08	222815408	246499008	221268304	466178656	421385472	442580512	136375408	133677872	131100760	374932128	348050432	365077120	1.92612	0.000134324	0.0031292	2.71232	2.19742e-06	0.000492095	3.72934e-09	2.03419e-07
SP_0750	SP_0750	15900645	branched-chain amino acid ABC transporter permease	CytoplasmicMembrane	289	30.8	9.52	10	24	2	High	0	10.635	80.49	8.53837e+06	3.12566e+06	6.16438e+06	5.10896e+06	1.99837e+06	7.54716e+06	7.41309e+06	9.46594e+06	9.46295e+06	9.5253e+06	1.02757e+07	9.16993e+06	6406405	6.5731e+06	6556475	7.38275e+06	2.02246e+06	6.98813e+06	9506417	5.54099e+06	9343868	11916246	9289795	8620805	0.839135	0.485794	0.598137	1.22285	0.336711	0.448311	0.228567	0.25949
SP_0751	SP_0751	15900646	branched-chain amino acid ABC transporter permease	CytoplasmicMembrane	318	33.5	9.66	7	10	2	High	0.002	9.43	28.62	823250	268261	461909	467668	594276	287544	541736	1.00174e+06	624578	458846	559200	695742	643957	498206	486680	638724	600107	270853	667281	630685	618619	550227	513653	660848	0.926844	0.663824	0.747844	0.899896	0.23155	0.332039	0.567249	0.594497
SP_0752	SP_0752	15900647	branched-chain amino acid ABC transporter ATP-binding protein	CytoplasmicMembrane	254	28.3	5.87	54	78	13	High	0	53.73	189.63	2.90174e+07	1.25159e+07	2.85449e+07	2.74731e+07	3.0025e+07	3.01192e+07	2.51571e+07	4.7045e+07	2.76389e+07	2.30253e+07	2.69042e+07	2.6313e+07	21280926	28116932	30520388	41356228	30400124	27672388	32958774	26068798	27238820	29113418	24113240	24624718	1.24413	0.258361	0.369178	0.902453	0.340775	0.451159	0.346666	0.379908
SP_0753	SP_0753	15900648	branched-chain amino acid ABC transporter ATP-binding protein	CytoplasmicMembrane	236	25.7	7.4	44	120	13	High	0	84.841	381.41	4.26724e+07	1.22931e+07	2.93518e+07	2.91627e+07	4.14401e+07	4.65935e+07	2.41388e+07	5.31561e+07	3.08937e+07	2.71545e+07	3.86004e+07	4.22024e+07	31116756	27644936	31488072	43975656	41962456	42750424	31497926	29385912	30492922	34510328	34521468	39440120	1.42592	0.00123434	0.00965935	1.18708	0.025264	0.0651312	0.000172967	0.00051994
SP_0754	SP_0754	15900649	acetoin utilization protein AcuB	Cytoplasmic	218	24.1	5.21	55	89	9	High	0	68.691	339.66	4.39517e+07	1.44272e+07	3.11443e+07	1.60436e+07	2.18473e+07	2.42002e+07	4.18795e+07	9.19963e+07	5.43137e+07	3.02635e+07	4.51806e+07	3.92671e+07	32046858	32618822	33316276	23753372	22085278	22272002	55241228	49897536	53561560	38501176	40383196	36739852	0.695135	0.000141809	0.0031292	0.72857	0.0014665	0.00986766	5.53833e-08	1.23074e-06
SP_0756	ftsE	15900650	cell division ABC transporter ATP-binding protein FtsE	CytoplasmicMembrane	230	25.8	9.58	69	253	15	High	0	94.018	852.56	1.36469e+08	3.40205e+07	8.5653e+07	6.00068e+07	9.0167e+07	1.00214e+08	6.74608e+07	1.24278e+08	9.036e+07	8.88611e+07	1.03848e+08	1.20014e+08	97060904	80369856	92179512	91924312	91480192	91397464	89663120	66586792	89135816	114665560	92423648	111701376	1.01926	0.713704	0.792551	1.29914	0.0894514	0.159273	0.110733	0.13504
SP_0757	ftsX	15900651	cell division ABC transporter permease FtsX	CytoplasmicMembrane	308	34.3	8.92	38	227	16	High	0	113.765	687.99	1.42496e+08	4.49277e+07	8.99146e+07	6.72322e+07	8.31158e+07	8.65391e+07	7.68051e+07	1.77182e+08	1.08319e+08	8.90046e+07	1.24633e+08	1.45856e+08	101264432	107610024	96715176	103233728	84273984	79114888	102224248	93925304	106474944	114796064	110955744	135800448	0.872486	0.17407	0.280788	1.19472	0.073093	0.138477	0.0305548	0.0436497
SP_0758	malT	15900652	PTS system transporter subunit IIABC	CytoplasmicMembrane	725	77.8	6.23	26	116	16	High	0	91.775	372.64	2.68544e+07	1.0944e+07	1.88991e+07	1.43132e+07	2.21078e+07	2.23109e+07	2.31967e+07	6.19228e+07	3.2407e+07	2.59856e+07	3.59533e+07	3.74565e+07	19766658	24351896	20206650	21172856	22389418	20531576	30303482	34019228	31972070	32967098	32210504	35063372	0.996403	0.997679	0.997679	1.04098	0.387341	0.494956	5.39868e-05	0.000211713
SP_0761	cshB	15900655	DEAD/DEAH box helicase	Cytoplasmic	447	50.7	9.66	66	254	29	High	0	151.365	727.37	1.59008e+08	4.76598e+07	1.10587e+08	7.93212e+07	1.26803e+08	1.34063e+08	8.16123e+07	1.7928e+08	1.00235e+08	7.82525e+07	1.16169e+08	1.14234e+08	113156736	114664048	119515184	122303144	128836456	122297776	108717320	94951192	98593728	100815136	103015880	106137160	1.07515	0.0388795	0.0958425	1.02549	0.56987	0.671882	0.00090358	0.00211777
SP_0762	metK	15900656	S-adenosylmethionine synthetase (EC:2.5.1.6)	Cytoplasmic	396	43.1	5.15	57	344	24	High	0	165.543	1092.25	2.24269e+08	6.36059e+07	1.61343e+08	9.3651e+07	1.33116e+08	1.43434e+08	1.90042e+08	4.32325e+08	2.40329e+08	1.77365e+08	2.82214e+08	2.6945e+08	158434960	155082992	173608352	145087392	134927728	130470080	256532000	222517632	236465536	230495936	249016336	249619664	0.842667	0.021542	0.0624691	1.01903	0.704766	0.780633	4.05533e-06	2.93156e-05
SP_0764	pyrDA	15900658	dihydroorotate dehydrogenase 1A (EC:1.3.3.1)	Cytoplasmic	311	34.5	5.12	50	263	18	High	0	120.565	906.85	3.22543e+08	8.4895e+07	2.23681e+08	1.12121e+08	1.54963e+08	1.86029e+08	1.7023e+08	4.1651e+08	2.31106e+08	1.12492e+08	1.56614e+08	1.65116e+08	226956560	210009488	241861040	174162016	157265456	169484416	229127840	215044864	227604864	144924992	139157616	153401008	0.737908	0.00400696	0.0204917	0.651233	0.000245194	0.00411589	1.55274e-05	7.66783e-05
SP_0765	holA	15900659	DNA polymerase III subunit delta	CytoplasmicMembrane	345	39.7	5.25	41	67	11	High	0	47.223	174.62	1.01141e+07	3.47361e+06	8.10572e+06	6.67284e+06	9.81852e+06	1.03986e+07	6.68339e+06	1.73444e+07	8.36177e+06	9.48104e+06	1.15368e+07	1.14707e+07	7553804	7324469	8641474	9697952	9942425	9610999	8555911	9920910	8.25816e+06	11852816	10364804	10801877	1.24369	0.0130409	0.0451206	1.23507	0.0364548	0.0825511	0.00309564	0.00594625
SP_0766	sodA	15900660	superoxide dismutase, manganese-dependent	Extracellular	201	22.4	5.06	49	196	10	High	0	76.955	702.52	3.95632e+08	1.09966e+08	2.65685e+08	5.91239e+07	8.08348e+07	8.74382e+07	2.59129e+08	5.01177e+08	3.04632e+08	7.19332e+07	8.77715e+07	8.92628e+07	277230848	275615616	287406176	90512872	81940008	79934064	351404928	256785616	300453632	92465264	78111416	83218776	0.30037	7.38233e-06	0.00137127	0.279312	0.000249393	0.00411589	1.49292e-07	2.45411e-06
SP_0767	SP_0767	15900661	hypothetical protein	Unknown	170	20.3	9.33	25	31	4	High	0	15.28	83.85	7.65119e+06	2.11487e+06	4742576	3.62879e+06	5.51244e+06	5146519	3.62683e+06	9186299	5.02909e+06	5.05885e+06	5.70469e+06	8.0084e+06	5.75014e+06	4.34522e+06	5039803	5.20194e+06	5.5762e+06	4775648	4.60493e+06	5.38254e+06	4.97068e+06	6271534	5160432	7534223	1.02766	0.748313	0.816543	1.26795	0.126483	0.204989	0.185683	0.213838
SP_0768	SP_0768	15900662	ribosomal RNA large subunit methyltransferase N	Cytoplasmic	361	41.3	7.21	6	4	2	High	0.002	7.921	9.92	198791	38219.9	123761	168750	113219	213362	181046	277492	86368.9	822158	864144	1.12468e+06	159740	64471.2	129940	225121	114016	200614	219021	182345	85648.2	993387	791705	1.06149e+06	1.52407	0.263786	0.376007	5.84497	0.00366916	0.0171567	0.000683682	0.0016565
SP_0770	SP_0770	15900664	ABC transporter ATP-binding protein	Cytoplasmic	513	58.4	5.27	53	257	24	High	0	162.666	883.61	1.22426e+08	3.69439e+07	8.42687e+07	9.61554e+07	1.54276e+08	1.71084e+08	4.66285e+07	1.1561e+08	6.27102e+07	8.99321e+07	1.40793e+08	1.2836e+08	87239928	87579864	90667536	149052368	156249984	155880896	61540796	62429608	61840516	115973232	125061360	119118504	1.73712	9.50776e-06	0.00137127	1.93828	7.95147e-06	0.000844447	5.33329e-10	4.92303e-08
SP_0771	slrA	15900665	cyclophilin type peptidyl-prolyl cis-trans isomerase	Unknown	267	29.1	5.55	57	136	12	High	0	65.139	430.31	7.71241e+07	1.60449e+07	4.78819e+07	2.50768e+07	3.42332e+07	5.41807e+07	4.06614e+07	1.1743e+08	5.65079e+07	4.10055e+07	5.03301e+07	5.66576e+07	55590352	36433152	51401936	37665020	34659636	49685860	53634592	62949620	55729992	52316928	44909136	52931460	0.85069	0.40453	0.517762	0.871417	0.126342	0.204989	0.128271	0.153925
SP_0776	SP_0776	15900670	KH domain-containing protein	Cytoplasmic	79	9	6.05	49	61	4	High	0	25.228	216.27	3.1456e+07	9.33899e+06	20917115	1.59786e+07	2.59238e+07	28732605	2.78649e+07	5.50368e+07	3.51155e+07	2.51805e+07	3.65718e+07	40263907	23081148	20707414	22353852	23753372	26242396	26391406	36548740	30346466	34634224	31938774	32743800	37670976	1.15489	0.0375388	0.0943648	1.00812	0.916544	0.942249	0.00025484	0.000711181
SP_0778	rimM	15900672	16S rRNA-processing protein RimM	Cytoplasmic	172	19.8	4.89	48	107	9	High	0	55.606	297.24	5.94729e+07	2.4694e+07	4.22493e+07	3.7887e+07	5.57793e+07	5.36204e+07	3.95932e+07	95769608	4.70114e+07	3.89735e+07	5.5187e+07	6.07512e+07	43101124	57468132	45262480	57433628	56571020	49138404	52162408	51888512	46365904	49730176	49254536	56743704	1.11871	0.311493	0.423292	1.03531	0.598864	0.697584	0.566522	0.594254
SP_0779	trmD	15900673	tRNA (guanine-N(1)-)-methyltransferase (EC:2.1.1.31)	Cytoplasmic	239	27.6	4.94	39	52	7	High	0	40.103	173.6	9.43451e+06	2.47203e+06	6.41745e+06	6.17797e+06	8.39921e+06	1.08478e+07	6.96553e+06	2.06956e+07	8.93307e+06	9.37505e+06	1.42217e+07	1.41359e+07	7.06142e+06	5126486	6834343	8969187	8503689	9978799	8933314	11799851	8820762	11726092	12781033	13233596	1.44313	0.0287771	0.0780328	1.27701	0.0676873	0.13167	0.00137797	0.00302646
SP_0780	SP_0780	118090036	ATP cone domain-containing protein	Cytoplasmic	112	12.9	7.64	73	164	12	High	0	85.29	566.64	1.32569e+08	4.48687e+07	1.12495e+08	9.09437e+07	1.37803e+08	1.57625e+08	9.79266e+07	2.4267e+08	1.39731e+08	8.91037e+07	1.27982e+08	1.33663e+08	94957760	107610024	120596336	140650384	140004496	144085376	130808880	127592024	137995504	114927216	113601400	124680216	1.31432	0.0162067	0.0524562	0.89105	0.0361909	0.0822711	0.00480574	0.00858168
SP_0781	SP_0781	15900674	hypothetical protein	Unknown	106	12.3	9.57	21	9	2	High	0.002	7.859	22.21	5859592	1.253e+06	3.66148e+06	1.44977e+06	2.80194e+06	2.5675e+06	2348676	5.43157e+06	3.36502e+06	2.39456e+06	3.09918e+06	3.15862e+06	4425878	2.50819e+06	3.88749e+06	2.03299e+06	2832164	2.39129e+06	2.96081e+06	3.23665e+06	3.33127e+06	2931508	2817503	2.98297e+06	0.670555	0.124921	0.225826	0.916384	0.0929024	0.162261	0.124531	0.149887
SP_0782	SP_0782	15900675	hypothetical protein	Cytoplasmic	71	8.1	5.08	39	30	3	High	0	12.499	97.24	2.13304e+07	8.34481e+06	1.44208e+07	8.15121e+06	9.69628e+06	8.54229e+06	11691994	2.41836e+07	1.55695e+07	9415695	1.24046e+07	8.37158e+06	15717621	18386748	15378871	11906529	9820813	7899710	15118499	13723263	15402580	11776761	11170579	7.87151e+06	0.598729	0.0162407	0.0524562	0.69656	0.0459688	0.0982175	0.00834226	0.0141195
SP_0784	gor	15900677	glutathione reductase (EC:1.8.1.7)	Cytoplasmic	448	48.8	6.21	48	193	20	High	0	111.032	543.69	1.24739e+08	2.18564e+07	6.87249e+07	2.99955e+07	4.18386e+07	4.97661e+07	6.24459e+07	1.55179e+08	8.18657e+07	3.48872e+07	4.34907e+07	4.42817e+07	89346192	50650380	73828760	45209636	42368236	45671128	82786080	82616096	80760840	44433380	38873912	41394976	0.623168	0.0568348	0.122268	0.506584	6.56724e-05	0.0024183	0.00122208	0.00272076
SP_0785	SP_0785	15900678	hypothetical protein	Unknown	399	41.8	5.24	84	437	28	High	0	216.642	1382.24	3.07192e+08	9.8605e+07	2.00702e+08	1.55903e+08	2.22727e+08	2.48204e+08	1.13342e+08	2.60896e+08	1.27567e+08	1.42884e+08	1.88883e+08	1.92859e+08	215911232	245713232	216933488	244505424	226322512	225662976	151326320	136716928	126176328	185668320	167321504	179323936	1.02643	0.614008	0.704658	1.2851	0.0142189	0.0424395	4.25978e-05	0.000173868
SP_0786	SP_0786	15900679	ABC transporter ATP-binding protein	CytoplasmicMembrane	233	25.7	6.37	79	156	14	High	0	100.564	633.85	7.17503e+07	2.0787e+07	4.23845e+07	3.09433e+07	4.94604e+07	5.42449e+07	2.38944e+07	6.10206e+07	2.87345e+07	3.29999e+07	3.64707e+07	3.87934e+07	51835328	47983432	45477780	46598524	50179436	49685860	31232414	33540898	28323536	41981812	32655014	36274092	1.00803	0.851011	0.899619	1.19135	0.12146	0.199262	0.000424232	0.00109244
SP_0787	SP_0787	15900680	hypothetical protein	CytoplasmicMembrane	419	45.3	5.67	35	173	15	High	0	87.765	536.77	6.80195e+07	2.59423e+07	5.67252e+07	4.30288e+07	6.41742e+07	5.98635e+07	1.92737e+07	5.00051e+07	2.65966e+07	2.65537e+07	3.02586e+07	35168867	49140076	60402112	60886380	65358256	65094140	54884112	25136472	27675548	26252656	33738572	27140394	32920870	1.08747	0.399868	0.513487	1.18637	0.0876015	0.157361	1.3223e-05	6.87602e-05
SP_0788	metG	15900681	methionyl-tRNA synthetase (EC:6.1.1.1)	Cytoplasmic	665	75.6	4.98	64	429	42	High	0	235.981	1311.2	2.46802e+08	8.05121e+07	1.74834e+08	1.21845e+08	1.6092e+08	1.7826e+08	1.57219e+08	3.73782e+08	2.14535e+08	1.54029e+08	2.11115e+08	2.19094e+08	174395472	198600480	188768048	190099600	163357664	162229824	211341856	193571488	211851568	200156480	186667024	203383296	0.917978	0.246652	0.358327	0.95694	0.331338	0.442554	0.0453853	0.061609
SP_0790	SP_0790	15900683	hypothetical protein	CytoplasmicMembrane	271	31.1	7.37	4	1	1	High	0.008	3.754	2.25	1197769	614131	751317	313616	371271	356491	113025	225342	179625	151353	94772.1	213953	932584	1.18933e+06	792653	424491	374679	334458	135726	149145	178333	178235	88103.5	204118	0.388952	0.00237916	0.0144484	1.01565	0.891372	0.924473	6.83478e-05	0.000253924
SP_0791	SP_0791	15900684	aldo/keto reductase	Cytoplasmic	308	35.1	6.43	25	22	5	High	0	16.17	31.07	1.5102e+07	4.64238e+06	10769268	5.10452e+06	6.10063e+06	6.39672e+06	9.63651e+06	1.92783e+07	1.20106e+07	5.8728e+06	7.00569e+06	6.43897e+06	11211803	9936303	11520921	7.36795e+06	6.17378e+06	5.9285e+06	12418673	11027526	11850513	7290498	6.33804e+06	6.06257e+06	0.595984	0.00299157	0.0169328	0.557874	0.000862749	0.00755227	4.38523e-05	0.000176914
SP_0792	SP_0792	15900685	hypothetical protein	Cytoplasmic	78	8.8	4.42	14	10	1	High	0.003	6.821	28.9	22366674	9501679	15845274	10305925	12610190	14704531	7175564	21656800	10425546	7.95852e+06	10805433	9303244	16514338	21079864	16880248	15131619	12759496	13561836	9206775	12350413	10271590	9928233	9737804	8742567	0.760961	0.0436276	0.101795	0.892545	0.317185	0.426672	0.000517487	0.00129372
SP_0794	SP_0794	15900687	MutT/nudix family protein	Cytoplasmic	166	19	4.78	35	31	5	High	0	26.807	81.72	1.60435e+07	4.78218e+06	1.10322e+07	6.3661e+06	7.73841e+06	1.03657e+07	3.5582e+07	8.13755e+06	3.85317e+06	2.43053e+06	3.23977e+06	2.55557e+06	11867674	10251209	11735108	9251624	7835063	9610999	46814832	4.7869e+06	3805372	2.98125e+06	2943910	2418544	0.788613	0.0380159	0.0949177	0.150589	0.200453	0.298769	0.1318	0.157687
SP_0795	SP_0795	15900688	hypothetical protein	Cytoplasmic	289	33.4	6.07	13	10	2	High	0.002	7.66	23.25	6792652	2.04145e+06	4.36133e+06	5.38342e+06	5.93342e+06	5.79593e+06	70047	918428	90057.2	111832	186122	251605	5114685	4194044	4634224	7782378	6001585	5.37529e+06	83446.3	580623	89313	131652	172118	240211	1.37412	0.0670966	0.139955	0.722052	0.913211	0.939646	5.56522e-05	0.000216827
SP_0796	SP_0796	15900689	hypothetical protein	Cytoplasmic	146	16.6	4.65	12	2	2	High	0.002	5.303	1.78	1327926	342273	388236	291233	993062	913327	602091	1.58056e+06	794888	619513	1.06621e+06	968307	1.0317e+06	643506	408443	392685	1.00361e+06	853817	742375	981390	786738	746339	979128	917945	1.07989	0.864081	0.910451	1.05294	0.679968	0.761131	0.702882	0.729831
SP_0797	pepN	15900690	aminopeptidase	Cytoplasmic	848	95.2	4.93	79	1402	67	High	0	543.27	5103.42	1.62163e+09	5.57736e+08	1.18521e+09	1.13617e+09	1.52538e+09	1.73928e+09	6.85013e+08	1.65773e+09	9.57449e+08	9.95789e+08	1.36281e+09	1.28756e+09	1105709568	1515408128	1293472768	1873462528	1555099392	1568285184	943736256	817489664	941906112	1328567168	1188914176	1189849088	1.27647	0.0854841	0.169226	1.37149	0.0062408	0.0248995	0.000913612	0.00213295
SP_0798	ciaR	15900691	DNA-binding response regulator CiaR	Cytoplasmic	224	25.5	4.72	40	109	11	High	0	47.828	285	7.53969e+07	2.05287e+07	4.96718e+07	2.39367e+07	3.39499e+07	3.89775e+07	4.25029e+07	9.76774e+07	5.87888e+07	2.88759e+07	4.76615e+07	4.7092e+07	54386340	47257256	53341364	35822336	34355324	35809244	56044656	52882780	57996716	36698084	42602216	44000964	0.683853	0.00120162	0.00946685	0.738666	0.00793146	0.0290033	0.000117171	0.000380014
SP_0799	ciaH	15900692	sensor histidine kinase CiaH	CytoplasmicMembrane	444	50.6	8.7	10	27	5	High	0	15.381	64.28	5.20473e+06	2.26453e+06	4.08033e+06	3.63178e+06	3.63487e+06	4.48924e+06	3.78245e+06	8.33004e+06	4.02781e+06	3.47505e+06	4.49637e+06	5.0601e+06	3.93586e+06	4669999	4335476	5.20194e+06	3.67244e+06	4166414	4.79829e+06	4.89487e+06	3.98314e+06	4.29083e+06	4.0802e+06	4767873	1.00769	0.997396	0.997679	0.960706	0.659916	0.745915	0.9374	0.943691
SP_0801	SP_0801	15900694	hypothetical protein	Cytoplasmic	309	35.5	5.21	42	99	10	High	0	56.202	299.11	2.02707e+07	8.7903e+06	1.64754e+07	2.11277e+07	3.47846e+07	3.49959e+07	1.17658e+07	3.03088e+07	1.51963e+07	1.68343e+07	2.79884e+07	2.87277e+07	14992687	19429418	17631210	31531940	35268048	32153474	15249720	17054058	15007955	21172856	25092904	26862786	1.901	0.00147087	0.0108547	1.54567	0.00604765	0.0248908	6.9015e-05	0.000255255
SP_0802	SP_0802	15900695	bifunctional ATP-dependent DNA helicase/DNA polymerase III subunit epsilon	Cytoplasmic	816	93.4	5.21	19	49	13	High	0	52.299	134.3	3.8402e+07	1.79926e+07	3.38842e+07	1.86671e+07	4.45105e+07	3.51603e+07	1.40097e+07	3.41943e+07	1.94687e+07	9.91052e+06	1.66841e+07	1.5928e+07	28036782	41227424	36328336	27865046	45107148	32336368	18141720	19171546	19249948	12398088	15015652	14916108	0.997311	0.955251	0.97362	0.748364	0.011069	0.0357646	0.000335507	0.000896678
SP_0803	rodA	15900696	rod shape-determining protein RodA	CytoplasmicMembrane	407	45.2	9.67	4	9	1	High	0.005	4.269	33.09	1.75488e+06	411149	838483	537694	646817	902018	677024	1.8953e+06	1154940	962160	950312	1.48388e+06	1350807	780420	884865	736702	653696	843580	836412	1.17291e+06	1.13773e+06	1165126	869981	1.40117e+06	0.740686	0.201691	0.309437	1.09191	0.67149	0.755185	0.184622	0.213025
SP_0804	SP_0804	15900697	4-methyl-5(b-hydroxyethyl)-thiazole monophosphate biosynthesis protein	Cytoplasmic	184	20.2	4.78	48	48	6	High	0	46.335	191.42	4.0581e+07	1.51388e+07	3.11663e+07	1.61921e+07	2.18801e+07	2.67322e+07	3.16478e+07	9.79026e+07	5.01691e+07	30568852	3.3429e+07	2.6303e+07	29613348	34285196	33423774	24057414	22186676	24560966	41476960	52987572	49520292	38887700	29898530	24624718	0.727532	0.00443844	0.0219289	0.648756	0.0422284	0.0925868	0.00186213	0.00389295
SP_0805	SP_0805	15900698	HAD superfamily hydrolase	Cytoplasmic	187	21.1	4.82	5	2	1	High	0.007	3.915	6.15	3417467	1.64452e+06	2.588e+06	1.45806e+06	2.24517e+06	2.07318e+06	2108495	4.51415e+06	3.00785e+06	2633614	2.47925e+06	3.05903e+06	2.6082e+06	3335368	2747189	2.04734e+06	2.27547e+06	1.92809e+06	2.65393e+06	2704972	2.97567e+06	3.23018e+06	2257222	2.88893e+06	0.719259	0.0215909	0.0624691	1.00501	0.968568	0.978194	0.0401289	0.0555773
SP_0807	ezrA	15900700	septation ring formation regulator EzrA	CytoplasmicMembrane	575	66.5	4.64	62	411	34	High	0	218.931	1436.22	4.19908e+08	1.26735e+08	2.80207e+08	2.19343e+08	3.32527e+08	3.6473e+08	2.24687e+08	5.71247e+08	3.0496e+08	2.60757e+08	3.68312e+08	4.45535e+08	293720096	320486528	302595616	346033984	338065056	331497408	304598944	291389376	300453632	341723776	324405632	413061280	1.10776	0.0224387	0.0640989	1.20386	0.0730396	0.138477	0.0381941	0.0532941
SP_0816	SP_0816	15900705	hypothetical_protein	Cytoplasmic	99	11.2	6.79	39	62	4	High	0	24.459	206.67	5.54945e+07	1.57752e+07	4.06142e+07	3.56883e+07	5.99535e+07	63542217	2.81347e+07	6.73857e+07	4.08149e+07	3.37207e+07	5.41344e+07	45768773	40254068	35955248	43539564	54022712	60832520	58166284	36814836	36936948	40253936	42884784	48279372	42791092	1.44487	0.00482915	0.0232181	1.17499	0.0314671	0.0748123	0.000400031	0.0010368
SP_0820	clpE	15900708	ATP-dependent Clp protease ATP-binding subunit ClpE	CytoplasmicMembrane	752	83.8	5.69	52	286	38	High	0	171.233	820.27	1.22289e+08	4.71662e+07	9.07739e+07	4.8739e+07	7.57409e+07	7.09519e+07	5.63634e+07	1.18536e+08	7.69724e+07	3.8648e+07	5.4731e+07	5.32092e+07	87239928	113402752	97687408	74242024	76764248	65000652	74706800	63989816	75932360	49213184	48811360	49676204	0.724053	0.0249412	0.0695729	0.688168	0.00248231	0.0136063	0.000125102	0.000396102
SP_0822	SP_0822	15900710	conserved_hypothetical_protein	Cytoplasmic	76	8.8	4.46	67	186	7	High	0	71.471	767.64	6.89472e+07	1.37881e+07	4.38738e+07	4.62254e+07	7.28065e+07	8.04411e+07	5.43971e+07	1.26365e+08	7.43474e+07	6.65857e+07	1.01011e+08	8.74601e+07	49778740	31193756	47093272	70342384	73821144	73561744	72016720	67624768	73271952	85558072	89774328	81547976	1.70011	0.0205188	0.0612004	1.2065	0.00708701	0.0274358	0.000861484	0.002035
SP_0823	SP_0823	15900711	amino acid ABC transporter permease	CytoplasmicMembrane	227	24.9	9.7	14	20	3	High	0	16.39	53.72	4.57028e+06	809555	2.89091e+06	2.37543e+06	3.22886e+06	3.67989e+06	13010865	2.62848e+07	1.93941e+07	9.08208e+06	1.62063e+07	1.58794e+07	3467079	1.5907e+06	3.06673e+06	3.37652e+06	3267474	3.41811e+06	16826216	14872755	19151286	11345930	14568888	14916108	1.23849	0.331784	0.443706	0.802964	0.123829	0.202865	1.46753e-05	7.37546e-05
SP_0825	SP_0825	15900713	bifunctional 5,1-methylene-tetrahydrofolate dehydrogenase/5,1-methylene-tetrahydrofolate cyclohydr	Cytoplasmic	285	30.7	6.54	31	69	7	High	0	43.652	198.5	1.77507e+07	5.49644e+06	1.28299e+07	1.22703e+07	1.64905e+07	1.99051e+07	2.08107e+07	5.25973e+07	2.80384e+07	2.54692e+07	3.08896e+07	3.34287e+07	13177456	11877699	13663649	18146340	16712358	18332060	27122016	29065510	27633282	32324370	27674302	31243732	1.37377	0.00339757	0.0183406	1.08854	0.181824	0.274491	5.01187e-07	6.01425e-06
SP_0828	rpiA	15900715	ribose-5-phosphate isomerase A (EC:5.3.1.6)	Cytoplasmic	227	24.8	5.06	30	58	8	High	0	37.04	188.36	1.79699e+07	5.67964e+06	1.23635e+07	1.02114e+07	1.5034e+07	1.79392e+07	1.28005e+07	3.33626e+07	1.67053e+07	1.40063e+07	2.175e+07	2.01105e+07	13322819	12286048	13234991	14981218	15191931	16498190	16563295	18737874	16487796	17599336	19567888	18839142	1.20151	0.00994135	0.0372822	1.08143	0.203741	0.301372	0.000265058	0.000729518
SP_0829	deoB	15900716	phosphopentomutase (EC:5.4.2.7)	Cytoplasmic	403	44.2	5.2	45	194	16	High	0	94.925	597.87	1.25895e+08	3.74041e+07	8.70006e+07	5.92803e+07	8.57856e+07	9.72799e+07	1.04223e+08	2.41101e+08	1.42276e+08	8.13207e+07	1.28662e+08	1.40878e+08	90047976	88826024	93583136	90826560	87014360	88941568	139091632	126577056	139965776	104732744	114483152	131167280	0.979172	0.352359	0.465816	0.86379	0.109891	0.184673	0.000129017	0.000405289
SP_0831	SP_0831	15900718	purine nucleoside phosphorylase (EC:2.4.2.1)	Cytoplasmic	269	28.9	5.24	38	208	9	High	0	66.782	693.32	8.55349e+07	2.82031e+07	5.74537e+07	3.88891e+07	5.73021e+07	7.50926e+07	5.73424e+07	159144127	7.94961e+07	5.13791e+07	8.04419e+07	6.53463e+07	61532080	66044060	61748788	58985568	58092952	68735424	75917936	84676144	78395976	65793928	71568128	60926704	0.981455	0.736101	0.808948	0.829695	0.0295307	0.0714217	0.00838954	0.0141795
SP_0835	deoD	15900722	purine nucleoside phosphorylase	Cytoplasmic	236	26.1	5.01	29	63	6	High	0	39.258	232.11	3.70937e+07	8.97298e+06	1.96255e+07	1.80366e+07	2.88763e+07	3.10706e+07	3.7293e+07	1.02907e+08	5.05838e+07	3.352e+07	6.06956e+07	65085074	27104422	19847274	20958058	26797594	29284550	28587162	49086580	55653496	49914580	42626828	54129464	60740820	1.24679	0.0828648	0.165446	1.01838	0.93855	0.959824	7.84013e-05	0.00028084
SP_0838	rpsT	15900725	3S ribosomal protein S2	Cytoplasmic	78	8.5	10.33	50	130	6	High	0	38.732	423.38	3.08528e+08	1.27628e+08	2.14996e+08	2.49982e+08	3.26457e+08	3.3691e+08	2.43027e+08	5.41553e+08	3.18768e+08	3.46661e+08	4.52218e+08	4.72911e+08	217292016	323136544	232105008	396262848	330954112	306187648	329364896	277072608	314233472	456127456	397930976	437967904	1.33768	0.106154	0.198505	1.40335	0.00659473	0.0258716	0.00948072	0.0158012
SP_0839	SP_0839	15900726	pantothenate kinase (EC:2.7.1.33)	Cytoplasmic	306	35.5	5.05	31	42	7	High	0	30.834	74.43	4.5274e+06	1.34425e+06	3.18372e+06	2.15315e+06	3.39992e+06	3.62077e+06	1.40269e+06	3.93479e+06	1.73046e+06	2.20954e+06	3.36928e+06	2.72144e+06	3.43727e+06	2.69807e+06	3.37576e+06	3.04284e+06	3.43957e+06	3362648	1.74956e+06	2.36796e+06	1.711e+06	2707777	3.06126e+06	2569097	1.03511	0.675367	0.75719	1.43058	0.0350129	0.0810062	0.00309701	0.00594625
SP_0841	SP_0841	15900728	hypothetical protein	Cytoplasmic	193	21.4	7.4	19	35	4	High	0	15.658	85.08	8.27922e+06	2.46859e+06	6.08063e+06	5.08141e+06	7.09508e+06	7.20923e+06	6.53995e+06	1.36712e+07	8.55393e+06	9.38491e+06	1.20319e+07	1.21152e+07	6.21481e+06	5126486	6470998	7.33838e+06	7.1867e+06	6674937	8.3738e+06	7917841	8445702	11726092	10812497	11363209	1.19019	0.082542	0.165084	1.37047	0.000534774	0.00596028	2.68989e-05	0.000118672
SP_0843	SP_0843	15900730	deoxyribose-phosphate aldolase	Cytoplasmic	220	23	5.2	59	147	12	High	0	69.058	528.89	1.87343e+08	4.28536e+07	9.28797e+07	6.70139e+07	9.75624e+07	1.00978e+08	5.1632e+07	1.31759e+08	6.87353e+07	4.51949e+07	6.72655e+07	6.53241e+07	132695192	102584488	99955656	102918880	98991376	92306928	68253072	70735048	67753344	57754296	59975404	60926704	0.877644	0.268368	0.381141	0.864154	0.0021283	0.0122175	5.78664e-05	0.000223279
SP_0844	SP_0844	15900731	cytidine deaminase (EC:3.5.4.5)	Cytoplasmic	129	14.2	4.78	23	7	2	High	0.002	7.916	22.61		26373.2		418719			2.77241e+06	6354939	3.89832e+06	5.17536e+06	5.17548e+06	5.16634e+06	na	43746.9	na	570344	na	na	3.49903e+06	3.76532e+06	3.85475e+06	6422343	4692532	4.87111e+06	13.0374	na	na	1.4377	0.0265524	0.0672247	0.0265522	0.0389519
SP_0845	SP_0845	15900732	lipoprotein	Unknown	350	36.7	5.52	74	1133	37	High	0	331.962	4157.59	1.48444e+09	5.09091e+08	1.03586e+09	1.07297e+09	1.42572e+09	1.58451e+09	7.02068e+08	1.52685e+09	9.50314e+08	9.99099e+08	1.34237e+09	1.37223e+09	1011797440	1376045440	1129829376	1755770496	1453383424	1424747904	967531968	755523904	935023104	1332619776	1171544960	1263346432	1.31732	0.0670647	0.139955	1.41738	0.0147217	0.0436074	0.00359641	0.0067644
SP_0846	SP_0846	15900733	sugar ABC transporter ATP-binding protein	CytoplasmicMembrane	511	55.1	5.59	58	273	29	High	0	167.825	889.38	1.61146e+08	5.24776e+07	1.10228e+08	9.89923e+07	1.53554e+08	1.61817e+08	8.24634e+07	1.92919e+08	1.12859e+08	1.08103e+08	1.57833e+08	1.5634e+08	114554064	126804072	118434624	153495360	156249984	147715136	109935192	102120368	111400808	139678688	140037712	145064768	1.27146	0.00214233	0.0135025	1.31326	0.000775532	0.00694427	1.79232e-05	8.6377e-05
SP_0847	SP_0847	15900734	sugar ABC transporter permease	CytoplasmicMembrane	352	37.4	9.6	18	66	5	High	0	36.003	151.49	1.4371e+07	5.92547e+06	9.71015e+06	6.88888e+06	8.91795e+06	1.00616e+07	6.02243e+06	1.32822e+07	9.06272e+06	7.49249e+06	8.16329e+06	1.24986e+07	10701184	12854228	10353737	10025560	9030521	9335101	7.69793e+06	7.69426e+06	8949080	9334096	7370646	11737376	0.837272	0.0785014	0.158911	1.16847	0.383261	0.491865	0.108693	0.132957
SP_0848	SP_0848	15900735	sugar ABC transporter permease	CytoplasmicMembrane	318	33.7	9.42	26	28	5	High	0	27.787	73.02	1.17451e+07	3.15255e+06	8.06761e+06	7.49203e+06	8.25539e+06	9.96759e+06	6.764e+06	6.59357e+06	1.04294e+07	7.89745e+06	1.0255e+07	1.28183e+07	8727289	6.61718e+06	8598685	10920304	8.36185e+06	9215523	8659995	3.9028e+06	10271590	9852350	9289795	12017983	1.19022	0.213656	0.323785	1.36461	0.280364	0.38419	0.405921	0.438044
SP_0851	SP_0851	15900736	glycerol-3-phosphate acyltransferase PlsY	CytoplasmicMembrane	213	22.9	9.88	8	2	1	High	0.005	4.345	5.21	624838	68890.9	129121	289798	166227	308277	156776	602902	201932	652161	503800	870828	491461	119737	135201	391305	167543	289567	189554	386776	200111	785409	463422	826296	1.13668	0.603926	0.698828	2.67261	0.0268125	0.067347	0.0799399	0.100659
SP_0855	SP_0855	15900740	DNA topoisomerase IV subunit A	Cytoplasmic	811	91.7	5.8	39	215	26	High	0	131.539	652.77	7.85716e+07	2.94001e+07	5.51029e+07	4.58143e+07	7.78391e+07	7.13073e+07	4.11703e+07	1.19138e+08	5.64717e+07	5.51003e+07	7.80527e+07	7.81834e+07	56652256	68997040	59161532	69718960	78895336	65273920	54303940	63989816	55729992	70598336	69533728	72911944	1.15734	0.146855	0.249251	1.22422	0.0179049	0.0497687	0.0374778	0.0524777
SP_0856	SP_0856	15900741	branched-chain amino acid aminotransferase (EC:2.6.1.42)	Cytoplasmic	340	37.5	5.1	51	211	13	High	0	105.257	764.75	1.19967e+08	4.24659e+07	7.84952e+07	5.79717e+07	7.75668e+07	9.23427e+07	6.07522e+07	1.54338e+08	7.6017e+07	6.42717e+07	8.44292e+07	8.76828e+07	85835360	101580464	84405384	88788384	78692464	84392872	80630504	82100760	74947112	82562960	75105360	81733440	0.926615	0.342858	0.456353	1.00725	0.870709	0.913544	0.154354	0.182308
SP_0858	SP_0858	15900742	hypothetical protein	CytoplasmicMembrane	229	25	9.11	33	88	8	High	0	54.252	326.75	2.40445e+07	7.78453e+06	1.39901e+07	1.48269e+07	2.53467e+07	2.87343e+07	1.51809e+07	5.0063e+07	1.78148e+07	1.86184e+07	3.41371e+07	3.33837e+07	17671986	17093124	14949982	21931112	25634026	26391406	19722282	27729080	17572960	23474554	30521126	31243732	1.48761	0.00672211	0.0292462	1.31089	0.162318	0.250486	0.0168267	0.0261893
SP_0859	SP_0859	15900743	hypothetical protein	CytoplasmicMembrane	307	32.8	8.82	8	35	3	High	0	12.685	98.08	44839925	1.17354e+07	3.18894e+07	25540228	29675011	2.38253e+07	27281669	79369306	42643228	37080718	45186771	51516150	32618964	26231190	34176728	38279632	30095780	21905650	35750356	43275864	42028576	47274540	40383196	48094828	0.970484	0.799599	0.860085	1.12141	0.230405	0.330802	0.0422545	0.0578169
SP_0860	pcp1	15900744	pyrrolidone-carboxylate peptidase (EC:3.4.19.3)	Cytoplasmic	214	23.4	5.41	69	239	16	High	0	96.923	784.26	2.47657e+08	8.00149e+07	1.6464e+08	1.53291e+08	2.0396e+08	2.32073e+08	1.38521e+08	3.39372e+08	1.83635e+08	1.88913e+08	258955713	2.38509e+08	175088848	197305552	177939264	239693264	207025952	211172992	186752720	176032976	181327184	246346960	228831168	221881360	1.19544	0.0398383	0.0965728	1.28109	0.00222081	0.0125241	0.00185383	0.00388916
SP_0861	SP_0861	15900745	hypothetical protein	Cytoplasmic	76	8.5	8.32	89	175	11	High	0	79.807	614.15	1.1815e+08	3.55959e+07	8.2078e+07	5.63162e+07	7.6976e+07	8.64418e+07	9.39677e+07	2.03723e+08	1.13552e+08	7.58685e+07	1.04902e+08	9.13382e+07	84430408	84344056	88292016	86124888	78083376	79023728	125517520	107741720	112385600	97683120	93306736	85075560	0.946183	0.17814	0.285318	0.798697	0.0212847	0.0564864	0.000511197	0.00128066
SP_0865	SP_0865	15900748	DNA polymerase III subunits gamma and tau (EC:2.7.7.7)	Cytoplasmic	551	60.7	5.45	34	81	13	High	0	63.17	233.12	2.58267e+07	9.8682e+06	1.82705e+07	1.50586e+07	2.18474e+07	2.51229e+07	1.03149e+07	3.02534e+07	1.45964e+07	1.50756e+07	1.9779e+07	1.97237e+07	18972594	21942408	19562646	22386346	22085278	23096206	13282740	17054058	14415974	19002114	17783614	18465730	1.11724	0.0713326	0.147692	1.23459	0.0469031	0.0996692	0.0010108	0.00233262
SP_0866	SP_0866	15900749	hypothetical protein	CytoplasmicMembrane	64	7.7	9.32	20	7	2	High	0	12.206	10.73	954776	227759	623045	662241	1.1523e+06	1.16662e+06	139712	797645	523857	705002	1.75297e+06	1.54171e+06	745240	420462	657064	910990	1.16242e+06	1092834	168725	507090	518720	850178	1596349	1457756	1.73705	0.0378725	0.0947626	3.26845	0.0392875	0.0875169	0.0170355	0.0264801
SP_0867	SP_0867	15900750	ABC transporter ATP-binding protein	Cytoplasmic	256	28.4	4.72	66	243	16	High	0	137.271	839.42	3.67665e+08	1.16602e+08	2.30776e+08	6.50677e+07	1.11177e+08	1.22552e+08	2.00486e+08	4.24938e+08	2.43595e+08	8.6109e+07	1.37155e+08	1.125e+08	257967968	294051808	249449792	99931952	112593344	112305176	270253472	219031968	240404368	111004728	121535848	104282024	0.405294	0.00014492	0.0031292	0.461597	0.00051222	0.00580483	1.26934e-06	1.18078e-05
SP_0868	SP_0868	15900751	hypothetical protein	Cytoplasmic	420	46.2	4.92	37	134	13	High	0	81.44	443.48	1.01287e+08	3.4019e+07	6.95561e+07	2.50495e+07	3.21647e+07	4.00953e+07	6.54633e+07	1.32393e+08	8.46623e+07	3.37763e+07	4.81831e+07	3.83979e+07	72469312	80369856	74799800	37511372	32631180	36814228	86965456	70735048	83519656	43013804	43045884	35901600	0.469853	0.00014357	0.0031292	0.505602	0.00145839	0.00986766	5.20103e-06	3.46736e-05
SP_0869	SP_0869	15900752	class-V aminotransferase	Cytoplasmic	408	45.2	5.15	29	56	8	High	0	41.389	168.01	2.45709e+07	5.79477e+06	1.11172e+07	4.48553e+06	5.23216e+06	5.52742e+06	18143018	3.23723e+07	2.05426e+07	6.79133e+06	8.64711e+06	8.87905e+06	18105682	12535899	11842240	6.46703e+06	5.29263e+06	5.12624e+06	23549728	18195300	20236290	8450200	7810344	8349215	0.397467	0.00388303	0.0200403	0.397051	0.000308736	0.00447095	2.36048e-05	0.000106596
SP_0871	SP_0871	15900754	intein-containing protein	Cytoplasmic	470	52.7	5	65	300	29	High	0	176.865	1024.17	2.30753e+08	7.01817e+07	1.53364e+08	5.48006e+07	7.15723e+07	8.27825e+07	1.42223e+08	2.83074e+08	1.77523e+08	6.68274e+07	9.60343e+07	8.53798e+07	163295264	172017200	164948752	83776536	72603272	75747000	190847872	147841056	175419040	85818584	85357840	79598112	0.464011	7.07254e-05	0.00266019	0.487786	0.000832252	0.00734009	1.74704e-06	1.51916e-05
SP_0872	dacA	15900755	D-alanyl-D-alanine carboxypeptidase	CytoplasmicMembrane	413	45.2	4.98	52	134	15	High	0	94.445	479.29	3.00999e+07	8.97731e+06	2.101e+07	2.14966e+07	2.99349e+07	3.61581e+07	1.36548e+07	3.2004e+07	1.82048e+07	2.75127e+07	3.32236e+07	3.11323e+07	22073350	19870452	22461266	32144084	30298656	33250424	17746924	17978110	17967554	34896192	29720678	29100188	1.4858	0.00107432	0.00894759	1.74544	0.000650743	0.00636101	8.65454e-06	4.993e-05
SP_0873	SP_0873	15900756	hypothetical protein	CytoplasmicMembrane	369	41.5	9.32	7	19	3	High	0.002	9.456	52.78	3893752	1.29042e+06	3.11369e+06	2.2655e+06	2.58629e+06	3.11656e+06	2.1019e+06	4603633	3.10849e+06	2.1555e+06	2.84577e+06	3.35377e+06	2.95976e+06	2.5925e+06	3.30116e+06	3.21683e+06	2.61959e+06	2.9003e+06	2.64115e+06	2.75713e+06	3.07445e+06	2.64567e+06	2591677	3.16161e+06	0.986818	0.90274	0.937306	0.991292	0.896644	0.928299	0.917613	0.929229
SP_0875	SP_0875	15900758	lactose phosphotransferase system repressor	Cytoplasmic	246	27.3	6.18	35	27	6	High	0	34.099	91.4	6.96056e+06	2.00012e+06	4.18887e+06	2.24242e+06	3.09104e+06	3.63488e+06	4.56683e+06	1.06694e+07	5.87302e+06	3.77259e+06	4.76248e+06	4.97865e+06	5240414	4.10777e+06	4.45283e+06	3.17332e+06	3.12574e+06	3371891	5818481	6.23521e+06	5.80007e+06	4.65356e+06	4.31439e+06	4692784	0.700741	0.00957135	0.0369984	0.765146	0.00168234	0.0107857	5.16813e-05	0.000204679
SP_0876	SP_0876	15900759	1-phosphofructokinase	Cytoplasmic	303	32.6	4.92	41	68	9	High	0	48.965	188.58	1.31677e+07	3.82774e+06	8.55165e+06	4.81211e+06	6.60615e+06	6.75496e+06	7.87755e+06	1.96785e+07	1.11215e+07	5.55697e+06	6.82129e+06	5.96594e+06	9824814	8.12405e+06	9112222	6939324	6.69035e+06	6251082	10119196	11248362	10962386	6.90027e+06	6.16734e+06	5.62175e+06	0.734662	0.0083531	0.0334698	0.578082	0.00121358	0.0088809	8.74457e-05	0.000306827
SP_0877	SP_0877	15900760	PTS system fructose specific transporter subunit IIABC	CytoplasmicMembrane	650	66.9	5.48	33	167	19	High	0	99.981	524.48	5.91783e+07	1.66211e+07	3.85841e+07	2.53135e+07	3.30743e+07	3.62226e+07	3.2195e+07	6.84844e+07	4.04639e+07	2.59804e+07	3.60847e+07	3.66843e+07	42887656	37868456	41386480	37972292	33543954	33250424	42276972	37519488	39958284	32967098	32299324	34318264	0.857741	0.0530773	0.116331	0.831572	0.00910257	0.0318427	0.00731671	0.0125609
SP_0878	ftsK,spoIIIE	15900761	spoE family protein	CytoplasmicMembrane	741	81.9	5.08	30	146	20	High	0	86.762	373.01	2.34817e+07	1.04952e+07	1.80401e+07	1.59657e+07	2.04451e+07	2.11075e+07	1.20341e+07	2.8209e+07	1.6699e+07	1.87216e+07	2.47818e+07	2.15798e+07	17310376	23414784	19240672	23753372	20665918	19431978	15512301	15910139	16487796	23602484	22242408	20239512	1.06479	0.562907	0.66838	1.37934	0.00265831	0.0141095	0.0190834	0.0293214
SP_0880	SP_0880	15900763	class-V aminotransferase	Cytoplasmic	380	41.7	7.61	39	70	13	High	0	57.734	190.64	3.75537e+07	1.47503e+07	2.73514e+07	2.67975e+07	3.42625e+07	3.71093e+07	2.57081e+07	6.36443e+07	3.2311e+07	2.35024e+07	34545822	26638827	27463054	33570592	29337780	40278780	34760936	34073020	33623196	34921908	31873440	29755320	30876822	24904560	1.20738	0.0753446	0.153473	0.851802	0.0833369	0.151557	0.0459381	0.0622652
SP_0881	thiI	15900764	thiamine biosynthesis protein ThiI	Cytoplasmic	404	45.1	5.49	50	155	17	High	0	100.052	503.9	7.13171e+07	2.44707e+07	5.07542e+07	3.80857e+07	5.61793e+07	5.69199e+07	4.68516e+07	1.03412e+08	6.0477e+07	4.37031e+07	5.79823e+07	5.7351e+07	51480780	56979696	54526732	57743960	56977068	52148492	61942924	55653496	59672208	55811556	51736676	53582500	1.02382	0.618778	0.709435	0.908964	0.0681179	0.13207	0.172575	0.201059
SP_0886	SP_0886	15900769	type I restriction-modification system, M subunit	Unknown	497	56.6	5.14	45	173	20	High	0	105.232	537.36	6.68491e+07	2.58573e+07	5.06065e+07	2.94023e+07	5.28806e+07	5.39239e+07	3.1182e+07	7.4781e+07	4.19522e+07	2.98044e+07	4.20192e+07	4.29571e+07	48288328	60402112	54311332	44284056	53628880	49412052	40943592	40849924	41436904	37857108	37541780	40184736	0.903824	0.305445	0.415863	0.937947	0.0420014	0.0922615	0.0020812	0.00426185
SP_0887	SP_0887	15900770	type I restriction-modification system subunit S	Unknown	373	42.6	9.2	6	9	2	High	0.002	9.535	18.19	171550	81188.3	159952	53681.8	102836	58042.5	1.16686e+06	2.81898e+06	1732141	1.19088e+06	1.96411e+06	2.32425e+06	138430	142267	167836	69605.7	103919	54975.3	1.458e+06	1.71807e+06	1.711e+06	1.44553e+06	1.78662e+06	2192632	0.509439	0.0224841	0.0640989	1.11003	0.520137	0.627052	8.48804e-08	1.70417e-06
SP_0888	SP_0888	15900771	hypothetical protein	Cytoplasmic	78	8.8	4.54	32	5	2	High	0.002	4.954	10.16							581852		512419	576588	643971	622097	na	na	na	na	na	na	717331	na	506850	693883	591223	590842	na	na	na	1.02161	0.834179	0.883116	0.834186	0.851935
SP_0892	SP_0892	15900775	type I restriction-modification system, R subunit	Cytoplasmic	1116	129.2	5.68	22	89	20	High	0	74.887	206.53	2.22534e+07	8.84307e+06	1.77828e+07	1.3243e+07	2.61283e+07	2.47052e+07	5.13766e+06	1.40532e+07	7.82497e+06	8.92801e+06	1.16219e+07	1.29788e+07	16441933	19545428	19026038	19506966	26445242	22729870	6556324	8.1412e+06	7725135	11155871	10454352	12205042	1.24846	0.102727	0.193819	1.50808	0.00644128	0.0254398	8.29426e-06	4.85517e-05
SP_0893	SP_0893	15900776	transcriptional repressor	Cytoplasmic	156	17.8	5.57	41	106	6	High	0	49.71	492.52	7.71622e+07	2.33585e+07	5.30693e+07	3.84694e+07	5.32648e+07	6.56265e+07	3.64132e+07	1.0206e+08	4.66563e+07	3.80387e+07	5.71874e+07	4.85492e+07	55661076	54297740	57005668	58364792	54034636	60080196	47883752	55131192	46070312	48437488	51027600	45303748	1.03303	0.411737	0.525833	0.971047	0.691448	0.770245	0.0240484	0.0356712
SP_0894	SP_0894	15900777	x-prolyl-dipeptidyl aminopeptidase (EC:3.4.14.11)	Extracellular	757	86.8	5.53	46	397	37	High	0	213.973	1146.59	3.94158e+08	1.32032e+08	2.73553e+08	1.44982e+08	2.27309e+08	2.31822e+08	1.28169e+08	3.45327e+08	1.80487e+08	1.01674e+08	1.56945e+08	1.61163e+08	275855392	333743424	296085056	226869856	230385616	211172992	171750720	179042992	177389184	131814352	139157616	149695936	0.738037	0.00814924	0.0328789	0.796444	0.0041955	0.0192239	2.56966e-06	2.03889e-05
SP_0896	pfkA	15900779	6-phosphofructokinase (EC:2.7.1.11)	Cytoplasmic	335	35.2	5.8	73	437	24	High	0	207.95	1542.2	8.93024e+08	3.03675e+08	6.34831e+08	4.67872e+08	6.27662e+08	6.91792e+08	5.00227e+08	1.16671e+09	6.97429e+08	5.06047e+08	6.93829e+08	6.88787e+08	616077952	801097856	688489472	752964992	637864640	626524352	685454336	582947904	686172672	668626944	609309184	637048512	0.95806	0.694752	0.777429	0.979745	0.777145	0.842506	0.704852	0.731049
SP_0897	pyk	15900780	pyruvate kinase (EC:2.7.1.4)	Cytoplasmic	501	54.7	5.15	84	1765	55	High	0	551.693	6288.41	2.71557e+09	9.94036e+08	2.02725e+09	1.56359e+09	2.16964e+09	2.43162e+09	1.90024e+09	3.99361e+09	2.55055e+09	1.894e+09	2.58827e+09	2.41006e+09	1839250176	2777914624	2211230720	2582904832	2206196224	2186619392	2660066048	1908273408	2507888384	2543622912	2254881280	2217556992	1.02158	0.815431	0.872286	0.991497	0.997965	0.997965	0.984744	0.987212
SP_0899	SP_0899	15900781	hypothetical protein	Unknown	290	32.7	5.54	32	32	8	High	0	35.493	91.06	1.50215e+07	5.46786e+06	1.05235e+07	9.96885e+06	1.24522e+07	1.37231e+07	7.45266e+06	1.83925e+07	1.07253e+07	8.69051e+06	1.07724e+07	1.12752e+07	11138882	11809727	11199635	14635503	12658179	12643608	9558539	10530038	10567645	10851959	9737804	10614718	1.16953	0.0411338	0.0976824	1.01788	0.723266	0.795091	0.00257651	0.00507687
SP_0901	SP_0901	15900782	hypothetical protein	Cytoplasmic	103	12.2	9.52	55	49	8	High	0	48.99	134.8	7.76147e+07	2.62663e+07	4.82508e+07	3.6536e+07	5.81221e+07	5.923e+07	9.99803e+06	2.30276e+07	1.10085e+07	1.19873e+07	1.45505e+07	1.65311e+07	55944384	61381540	51832936	55262580	58904860	54245896	12889857	13064913	10863702	15052809	13138738	15476779	0.995593	0.96379	0.976857	1.18604	0.0927599	0.162261	1.37508e-08	4.45972e-07
SP_0902	SP_0902	118090029	hypothetical protein	Cytoplasmic	238	28.2	4.98	5	3	1	High	0.002	4.847	4.41	1.6827e+06	326063	796358	913647	1.49889e+06	1.44069e+06	47434.6						1.29773e+06	611945	840346	1.26747e+06	1.5165e+06	1.34366e+06	56159.2	na	na	na	na	na	1.50095	0.114536	0.209324	na	na	na	0.114535	0.139173
SP_0904	SP_0904	15900785	hypothetical protein	CytoplasmicMembrane	271	31.1	7.02	5	1	1	High	0.008	3.812	2.53	4.28388e+06	1.79805e+06	3.77517e+06	2.80032e+06	7375396	6216561	1.29317e+06	5.21593e+06	2.19151e+06	951901	2.14683e+06	1.72346e+06	3.2509e+06	3.67772e+06	4.01546e+06	3.98779e+06	7.47037e+06	5762565	1.61002e+06	3.11557e+06	2.16555e+06	1152845	1.95865e+06	1.62745e+06	1.57352	0.0915653	0.178537	0.687686	0.216003	0.314747	0.00195808	0.00407226
SP_0906	SP_0906	15900787	hypothetical protein	Unknown	43	5.1	9.04	65	44	5	High	0	28.569	81	6.06784e+06	1.42303e+06	3.91069e+06	3.00317e+06	4.0298e+06	4.85097e+06	6.24101e+06	9.20495e+06	7.39729e+06	3.21051e+06	4.75355e+06	3.70621e+06	4.58158e+06	2.86738e+06	4154122	4279659	4077442	4498780	7.98378e+06	5388202	7.31054e+06	3.95348e+06	4305378	3.49999e+06	1.10797	0.451739	0.566983	0.568541	0.0141877	0.0424395	0.0100415	0.0165746
SP_0908	SP_0908	15900789	transcriptional regulator	Cytoplasmic	709	78.7	5.78	58	333	47	High	0	227.575	974.33	1.53887e+08	4.70052e+07	1.05331e+08	7.7338e+07	1.12238e+08	1.19367e+08	7.90202e+07	1.89993e+08	1.06026e+08	9.60537e+07	1.33489e+08	1.35769e+08	109661296	112898360	113030328	119145976	113608384	108670784	105199728	100585384	104504848	124086416	118009656	126533704	1.01739	0.589034	0.691655	1.18802	0.00234922	0.0130599	0.00153405	0.00329903
SP_0912	SP_0912	15900793	ABC transporter ATP-binding protein	CytoplasmicMembrane	252	28.1	8.24	31	31	5	High	0	30.252	91.57	2.76106e+06	965102	2.00388e+06	881367	1.16054e+06	1.4621e+06	998052	3.79268e+06	1.85696e+06	768891	884251	684975	2.11301e+06	1.91162e+06	2.11919e+06	1.22064e+06	1.17253e+06	1.36223e+06	1240555	2.28637e+06	1.83947e+06	928478	809912	650443	0.611249	0.000928953	0.00855773	0.445147	0.0188468	0.0514124	0.00109331	0.0024895
SP_0913	SP_0913	15900794	ABC transporter permease	CytoplasmicMembrane	662	74.3	9.29	7	25	5	High	0	15.489	30.03	2.28402e+07	1.29893e+07	2.10654e+07	1.21949e+07	2.99165e+07	2.05212e+07	5.6101e+06	1.89685e+07	8.72793e+06	3.39408e+06	6.51022e+06	6.75048e+06	16803878	29298572	22568702	17995372	30298656	18882050	7.16569e+06	10861770	8623371	4178334	5888753	6353232	0.978228	0.917697	0.948612	0.616128	0.0511369	0.106543	0.000262032	0.000724513
SP_0916	SP_0916	15900796	lysine decarboxylase	Cytoplasmic	491	53.9	5.41	18	27	6	High	0	29.154	86.59	4.38512e+06	1.24684e+06	2.61976e+06	2.4545e+06	3.29975e+06	3.70338e+06	3.61548e+06	9.40669e+06	5.09295e+06	5.82918e+06	7.17963e+06	7.96064e+06	3.33293e+06	2.50819e+06	2779141	3478239	3338332	3.43659e+06	4.59205e+06	5507045	5.02991e+06	7.24012e+06	6490751	7487358	1.18943	0.098388	0.188459	1.40249	0.00751785	0.0284466	1.02146e-05	5.60569e-05
SP_0918	SP_0918	15900798	spermidine synthase (EC:2.5.1.16)	Cytoplasmic	286	32.8	5.01	27	77	7	High	0	45.832	243.17	1.83545e+07	6.3128e+06	1.35889e+07	1.41445e+07	1.86422e+07	2.05612e+07	1.5273e+07	3.23333e+07	1.87247e+07	1.90216e+07	2.53035e+07	2.18458e+07	13613500	13720144	14521138	20869722	18841108	18973740	19854032	18140982	18460784	23986466	22687932	20426144	1.4021	0.000958953	0.00860106	1.18855	0.0349553	0.0810062	5.91627e-05	0.000226546
SP_0919	SP_0919	15900799	hypothetical protein	Cytoplasmic	419	47	4.84	30	186	11	High	0	82.494	626.61	9.80848e+07	3.06308e+07	6.40819e+07	5.8968e+07	9.19046e+07	9.82032e+07	6.55165e+07	1.71645e+08	9.17111e+07	8.54445e+07	1.30487e+08	1.17126e+08	70425456	71955856	68866560	90355984	93205576	89760240	86965456	91359544	90416424	110089560	115364904	108919000	1.29384	0.00011531	0.00305571	1.24422	0.000705822	0.00657087	1.40125e-07	2.33542e-06
SP_0920	SP_0920	15900800	carboxynorspermidine decarboxylase	Cytoplasmic	375	42	5.02	23	53	7	High	0	45.084	142.45	9.70488e+06	2.68592e+06	5.50836e+06	6.15778e+06	7.6347e+06	9.14504e+06	8.76724e+06	1.36284e+07	1.26813e+07	1.26043e+07	1.85156e+07	1.81242e+07	7.25991e+06	5606786	5862040	8939456	7723617	8461118	11281088	7.86197e+06	12541268	15816209	16623216	16971458	1.34148	0.0299205	0.080571	1.55947	0.0316593	0.0748123	0.000250418	0.000703751
SP_0921	SP_0921	15900801	agmatine deiminase	Cytoplasmic	361	40.3	4.64	32	40	9	High	0	41.72	121.35	4.51431e+06	2.59562e+06	3.69465e+06	3.86363e+06	6.1488e+06	6.3446e+06	3.74328e+06	7.2314e+06	5.6489e+06	5.26165e+06	6.0815e+06	6.45885e+06	3.42237e+06	5410053	3.91947e+06	5.53965e+06	6.22443e+06	5873185	4746719	4268603	5.58286e+06	6.52293e+06	5502198	6.08132e+06	1.38311	0.0708212	0.146935	1.24032	0.0766391	0.142469	0.0447026	0.0610275
SP_0922	SP_0922	15900802	carbon-nitrogen hydrolase	Cytoplasmic	291	33.1	5	34	67	8	High	0	36.184	215.61	2.53602e+07	9.76033e+06	2.2607e+07	1.74597e+07	2.34388e+07	2.34866e+07	1.431e+07	2.00563e+07	1.98804e+07	2.09146e+07	2.81026e+07	2.12425e+07	18683702	21685848	24179704	26035818	23707542	21630892	18536644	11469049	19644458	26420050	25181940	19866112	1.10573	0.32443	0.436854	1.43943	0.116044	0.191989	0.0992152	0.123121
SP_0923	SP_0923	15900803	Cof family protein	Cytoplasmic	269	30	4.64	29	85	6	High	0	32.221	236.38	2.15314e+08	5.44876e+07	1.4702e+08	1.14303e+08	1.75e+08	1.84702e+08	1.47883e+08	2.57686e+08	1.87665e+08	9.54506e+07	1.76679e+08	1.80992e+08	152181072	131878912	158454800	177347104	177574688	168578384	199040576	135197920	185265936	123301168	156763792	168216352	1.18301	0.0427408	0.100853	0.862902	0.400234	0.50809	0.353038	0.386538
SP_0927	SP_0927	15900807	LysR family transcriptional regulator	Cytoplasmic	302	35	5.03	36	65	9	High	0	45.935	193.39	1.97302e+07	6.72306e+06	1.48924e+07	9.53945e+06	1.37449e+07	1.58386e+07	1.43946e+07	3.21511e+07	1.83938e+07	9.7262e+06	15091978	1.36021e+07	14557407	14657341	15914979	13989556	13874327	14571527	18668364	18086708	18164820	12169822	13585771	12766110	0.940298	0.133131	0.236794	0.701416	0.000439267	0.00539744	3.15513e-05	0.000134902
SP_0928	SP_0928	15900808	lipoprotein signal peptidase	CytoplasmicMembrane	153	17.1	6.28	8	7	1	High	0.003	4.764	24.18	1.80387e+06	318037	767613	253962		473347	763743	2.15613e+06	1371260	823273	641940	1.4913e+06	1.3887e+06	596192	810669	341648	na	443762	945694	1.32772e+06	1.3552e+06	994614	589399	1.41061e+06	0.421424	0.0933955	0.181499	0.82528	0.43743	0.545343	0.0514921	0.0682768
SP_0929	rluD	15900809	ribosomal large subunit pseudouridine synthase D	Cytoplasmic	295	32.8	8.82	44	109	13	High	0	60.356	272.93	4.61918e+07	1.79331e+07	3.86442e+07	3.23992e+07	4.70608e+07	4.66424e+07	1.85628e+07	5.66779e+07	3.3298e+07	2.43512e+07	3.38657e+07	3.16039e+07	33619576	40987044	41386480	48915924	47744684	42750424	24210680	31252720	32859516	30911014	30343234	29566240	1.20189	0.0784407	0.158911	1.02828	0.722375	0.795091	0.00231285	0.00464117
SP_0930	cbpE	15900810	choline binding protein E	Extracellular	627	72	5.63	2	1	1	High	0.008	3.754	1.62				281434		491491							na	na	na	378875	na	460566	na	na	na	na	na	na	ON	na	na	na	na	na	na	na
SP_0931	SP_0931	15900811	gamma-glutamyl kinase (EC:2.7.2.11)	Cytoplasmic	369	39.9	5.52	40	46	12	High	0	64.149	161.74	1.97544e+07	9.05778e+06	1.46243e+07	6.6805e+06	5.49039e+06	8.5496e+06	1.18662e+07	1.90626e+07	1.34034e+07	9.89769e+06	1.22688e+07	1.0374e+07	14629976	20056302	15593293	9712839	5.55596e+06	7908909	15381049	10917031	13231969	12385407	11081063	9772421	0.460977	0.013982	0.0469828	0.840851	0.235205	0.335231	0.00654841	0.0113556
SP_0932	proA	15900812	gamma-glutamyl phosphate reductase (EC:1.2.1.41)	Cytoplasmic	420	45.2	5.17	46	125	17	High	0	77.627	341.81	50379946	1.6057e+07	3.61497e+07	2.40257e+07	3.37139e+07	3.95797e+07	3.2128e+07	7.20794e+07	4.99369e+07	3.30245e+07	4.74715e+07	4.44763e+07	36618472	36672184	38695528	35975820	34152424	36357464	42143592	39423840	49224584	41981812	42424700	41581148	0.950883	0.130166	0.232069	0.963267	0.642707	0.732649	0.0115863	0.0187886
SP_0933	SP_0933	15900813	pyrroline-5-carboxylate reductase	Cytoplasmic	265	28	5.41	18	20	3	High	0	16.007	62.85	5.20517e+06	2.24919e+06	4.01953e+06	2.22299e+06	3.38071e+06	4.53613e+06	3.73879e+06	8.68245e+06	4.9443e+06	3.72808e+06	5.33198e+06	4.31685e+06	3.9433e+06	4648314	4271458	3.14432e+06	3419332	4.21258e+06	4746719	5.09354e+06	4.8818e+06	4603517	4827534	4.07308e+06	0.837765	0.139354	0.241795	0.917272	0.180594	0.272985	0.0222981	0.0333222
SP_0935	tmk	15900815	thymidylate kinase (EC:2.7.4.9)	Cytoplasmic	212	23.3	4.94	47	80	9	High	0	41.273	199.91	1.80901e+07	4.50323e+06	1.14987e+07	7.74581e+06	1.19335e+07	1.30728e+07	8.89517e+06	1.7312e+07	9.94529e+06	8.39596e+06	1.2841e+07	1.1747e+07	13395497	9621874	12270707	11308594	12050117	12092516	11450930	9920910	9827468	10484837	11528576	10988970	1.00462	0.899112	0.935205	1.05779	0.363572	0.470198	0.422063	0.453426
SP_0936	holB	15900816	DNA polymerase III subunit delta' (EC:2.7.7.7)	Cytoplasmic	296	34.3	6.8	15	29	4	High	0	14.889	69.38	4.32577e+06	780029	1.67638e+06	2.37727e+06	1.5528e+06	1.55269e+06	2.21876e+06	4.36637e+06	2.61398e+06	2.63867e+06	3.53476e+06	3.18151e+06	3.28819e+06	1.52892e+06	1.77888e+06	3.37652e+06	1567094	1.44579e+06	2.79452e+06	2.62376e+06	2.58052e+06	3.24262e+06	3.20565e+06	3001770	0.968679	0.891308	0.928744	1.18143	0.00815399	0.0294296	0.289129	0.319774
SP_0937	yabA	15900817	DNA replication intiation control protein YabA	Cytoplasmic	105	12.4	5.1	52	53	6	High	0	35.718	161.93	1.89896e+07	5.59577e+06	1.14759e+07	7.54747e+06	1.14923e+07	1.30787e+07	1.2521e+07	2.81304e+07	1.41712e+07	1.0211e+07	1.51322e+07	8.05545e+06	14049295	12104471	12270707	11009887	11644788	12092516	16169048	15855643	14021310	12766012	13585771	7.58105e+06	0.904298	0.145046	0.247941	0.736933	0.152852	0.238108	0.164079	0.192469
SP_0938	SP_0938	15900818	tetrapyrrole methylase	Cytoplasmic	289	32.4	5.33	44	100	11	High	0	60.63	275.53	2.00896e+07	7.32294e+06	1.63304e+07	1.10485e+07	1.22782e+07	1.36941e+07	1.31041e+07	2.68211e+07	1.55088e+07	1.04576e+07	1.74701e+07	1.69407e+07	14847612	16033895	17416660	16185318	12455488	12643608	16957730	15145996	15303915	13146818	15730258	15850509	0.854782	0.168539	0.27562	0.943468	0.441682	0.549409	0.288931	0.319774
SP_0939	SP_0939	15900819	hypothetical protein	Unknown	172	20.5	5.72	22	9	4	High	0	13.646	17.02	4.35022e+06	1.28218e+06	2.32442e+06	1.09329e+06	1.98038e+06	1.89529e+06		198466				46884.5	3303101	2.57141e+06	2.45972e+06	1.51789e+06	2.00221e+06	1.77049e+06	na	131809	na	na	na	44996.4	0.634803	0.0206187	0.06133	0.341377	na	na	0.0206187	0.0312011
SP_0943	gid	15900822	tRNA (uracil-5-)-methyltransferase Gid	Cytoplasmic	444	49.2	5.33	52	157	19	High	0	102.006	525.24	8.86762e+07	2.60168e+07	6.14305e+07	2.68014e+07	3.77076e+07	3.79496e+07	4.44826e+07	8.71974e+07	5.89536e+07	3.29311e+07	4.21645e+07	4.33073e+07	63792976	60646924	65954204	40278780	38209424	34804128	58724760	47378828	58193816	41852716	37719568	40464064	0.595041	0.000451704	0.00560305	0.730604	0.0154404	0.0449418	0.000106685	0.000353653
SP_0945	frr	15900824	ribosome recycling factor	Cytoplasmic	185	20.6	6.39	72	328	24	High	0	160.003	1041.21	3.93074e+08	1.23493e+08	2.80203e+08	1.95265e+08	244878702	2.81135e+08	3.02211e+08	6.02306e+08	4.00055e+08	2.53215e+08	3.44331e+08	3.41813e+08	275167488	309899904	302595616	307260608	248668800	255534608	410739424	306668768	393955840	331107488	303380032	317067040	0.914158	0.286935	0.397819	0.856204	0.19348	0.28948	0.036009	0.0507169
SP_0946	SP_0946	15900825	conserved_hypothetical_protein	Cytoplasmic	284	32.4	6.16	38	55	9	High	0	46.771	154.17	6.35475e+06	2.1042e+06	5.48714e+06	4.12683e+06	8.61443e+06	9.99377e+06	5.52202e+06	9.96076e+06	4.58078e+06	7.14616e+06	8.21474e+06	1.34907e+07	4789038	4.32361e+06	5840672	5.93671e+06	8716458	9233916	7.04894e+06	5.81789e+06	4.5263e+06	8904632	7.41553e+06	12672599	1.59744	0.0494882	0.111396	1.66691	0.0686828	0.132657	0.0299084	0.0428283
SP_0947	SP_0947	15900826	hypothetical protein	Unknown	71	8.4	4.81	14	6	1	High	0.006	4.175	13.26	856282	234655	577804	686401	1.01519e+06	1.09848e+06	759971	1.39768e+06	926546	837582	1.06554e+06	1.24023e+06	669303	434022	609420	944817	1030918	1.02776e+06	940667	873103	917257	1.013e+06	979128	1.17476e+06	1.75361	0.0127539	0.044391	1.15959	0.0726981	0.138433	0.00113565	0.00256293
SP_0948	SP_0948	15900827	PhoH family protein	Cytoplasmic	322	36.2	6.07	48	65	11	High	0	48.4	182.32	2.80192e+07	9.80517e+06	2.01999e+07	1.19739e+07	1.7726e+07	2.04059e+07	1.12168e+07	2.38441e+07	1.50707e+07	1.22075e+07	1.63222e+07	1.63064e+07	20560134	21802472	21602292	17693324	17928772	18790432	14462457	13503947	14909296	15307276	14658275	15289890	0.850662	0.00329743	0.0181359	1.0555	0.168506	0.257702	3.00102e-06	2.29377e-05
SP_0950	SP_0950	15900828	acetyltransferase	Cytoplasmic	166	19.1	5.35	20	8	3	High	0.002	9.416	14.91	3.53881e+06	928083	2.06434e+06	1.89009e+06	2.75597e+06	3.62195e+06	144910	419682	377838	398580	225608	655064	2698037	1.83476e+06	2.18302e+06	2666672	2791677	3362648	174847	272666	374285	477370	208873	622064	1.31346	0.101434	0.192333	1.592	0.353388	0.460582	6.91316e-05	0.000255255
SP_0959	infC	15900836	translation initiation factor IF-3	Cytoplasmic	176	20.1	9.83	67	147	12	High	0	64.63	484.85	1.08397e+08	3.34263e+07	7.62952e+07	8.91932e+07	1.16683e+08	1.28745e+08	6.8032e+07	2.007e+08	1.13602e+08	1.07055e+08	1.55431e+08	1.56598e+08	77398392	78882000	82030480	137957936	118684296	117756232	90337832	106209672	112385600	138367200	137395600	145991520	1.57105	0.00116277	0.00943235	1.3652	0.00986903	0.0335547	7.73358e-05	0.000277853
SP_0961	rplT	15900838	5S ribosomal protein L2	Cytoplasmic	119	13.7	10.83	56	535	10	High	0	111.666	1713.17	7.8728e+08	2.75061e+08	5.27809e+08	5.29493e+08	7.48979e+08	7.86429e+08	5.40795e+08	1.10389e+09	6.74e+08	6.43322e+08	9.75522e+08	8.58091e+08	544185984	721081792	572053632	853596224	760871680	711187328	742579200	549200384	663548544	852494784	855031360	792632192	1.26579	0.0773637	0.157153	1.27864	0.0505886	0.105948	0.0361197	0.0508131
SP_0962	SP_0962	15900839	lactoylglutathione lyase	Cytoplasmic	126	14.4	5.03	43	108	6	High	0	53.116	368.44	1.22871e+08	2.81185e+07	7.54154e+07	3.77149e+07	5.91732e+07	6.71868e+07	7.40108e+07	2.20385e+08	9.83943e+07	5.32845e+07	7.21028e+07	7.57856e+07	87941880	65798404	81059056	57123268	60020724	61538432	98439800	115899400	97017544	68260416	64224696	70682952	0.761001	0.0403934	0.0973041	0.652525	0.00260814	0.0140284	0.000560696	0.00137876
SP_0963	SP_0963	15900840	dihydroorotate dehydrogenase electron transfer subunit (EC:1.3.5.2)	Cytoplasmic	266	28.9	5.15	8	3	2	High	0.003	6.694	8.01	38427	19792.5		273366	441288	496285		143552	66530.2	374264	598233	686410	31751.3	32345.2	na	367836	445433	465232	na	96884.8	65934.5	447058	549252	651390	13.2977	0.000103845	0.00305571	6.74654	0.00244167	0.0135098	5.15372e-06	3.45501e-05
SP_0964	SP_0964	15900841	dihydroorotate dehydrogenase 1B (EC:1.3.3.1)	Cytoplasmic	312	33.1	5.14	12	10	3	High	0	10.78	19.75	6.82259e+06	2.04552e+06	3.99967e+06	145192	232444	1.15882e+06	1.62328e+06	4.1284e+06	2.17198e+06	1.86816e+06	2.43093e+06	2.85556e+06	5.13688e+06	4215618	4250121	192448	234216	1.08354e+06	2.02915e+06	2.48434e+06	2.14579e+06	2.28588e+06	2.212e+06	2.70082e+06	0.111023	0.0102611	0.0379958	1.081	0.419304	0.528863	0.00118246	0.00265225
SP_0965	lytB	15900842	endo-beta-N-acetylglucosaminidase	Extracellular	658	76.4	5.38	28	89	13	High	0	65.007	279.21	1.28503e+07	4.35937e+06	7.93358e+06	6.11e+06	9.50089e+06	1.08448e+07	7.89918e+06	1.87412e+07	1.1307e+07	1.0266e+07	1.31621e+07	13623249	9605492	9307897	8448920	8865172	9618177	9978799	10145262	10695968	11159754	12892928	11886518	12766110	1.0402	0.488689	0.601067	1.17326	0.0131589	0.0407265	0.000476948	0.0012116
SP_0966	pavA	15900843	adherence and virulence protein A	Cytoplasmic	551	63.3	8.66	31	117	18	High	0	75.859	303.57	2.0912e+07	7.22556e+06	1.44247e+07	1.27624e+07	1.66897e+07	1.75517e+07	1.30117e+07	2.75347e+07	1.84e+07	2.17746e+07	2.68524e+07	2.36027e+07	15427713	15827049	15378871	18901942	16915110	16223018	16826216	15528234	18164820	27573970	24113240	22105948	1.11593	0.0815458	0.163935	1.46069	0.00869886	0.0309205	0.000490732	0.00123714
SP_0967	SP_0967	15900844	metalloprotease	Cytoplasmic	165	19.2	4.27	41	58	6	High	0	38.702	177.27	2.58407e+07	7.4989e+06	1.43587e+07	9.57991e+06	1.52434e+07	1.74052e+07	1.29357e+07	3.12456e+07	1.722e+07	7.0332e+06	1.08983e+07	1.24274e+07	18972594	16448000	15378871	14049619	15394650	16039547	16694733	17543426	16981058	8753132	9827393	11643842	0.89536	0.21382	0.323785	0.590098	0.00315265	0.0155334	0.000429999	0.00110492
SP_0970	SP_0970	15900847	formamidopyrimidine-DNA glycosylase (EC:3.2.2.23)	Cytoplasmic	274	31.2	6.46	32	59	8	High	0	42.9	178.62	1.61071e+07	5.57303e+06	8.88835e+06	6.9605e+06	9.44622e+06	7430289	1.0684e+07	2.25774e+07	1.27812e+07	7.76857e+06	1.00966e+07	1.11843e+07	11940501	12036431	9476061	10129868	9567516	6877604	13806870	12845226	12639930	9687991	9110561	10521151	0.794398	0.173309	0.280355	0.7462	0.00412064	0.018955	0.0275697	0.0401989
SP_0971	coaE	15900848	dephospho-CoA kinase (EC:2.7.1.24)	CytoplasmicMembrane	201	23	4.78	38	39	6	High	0	26.488	79.54	3.96697e+06	2.4119e+06	4.18374e+06	2.80272e+06	3.7199e+06	4.22875e+06	7.43363e+06	8.56505e+06	8.57507e+06	4.85008e+06	8.53626e+06	5.18424e+06	3.01952e+06	4.99586e+06	4442153	3.98779e+06	3763559	3.9263e+06	9532494	5.03113e+06	8475307	6.00771e+06	7711652	4880509	0.937396	0.793409	0.854325	0.807324	0.455375	0.562423	0.0313216	0.044692
SP_0974	secG	15900851	preprotein translocase subunit SecG	CytoplasmicMembrane	77	8.5	9.7	32	34	2	High	0	13.5	126.35	14978765	5.99396e+06	8.9255e+06	3.55444e+06	4.20212e+06	5.12179e+06	5.70922e+06	1.13854e+07	8.51405e+06	5.90454e+06	4.87133e+06	1.0752e+07	11138882	12990775	9518846	5084612	4.24958e+06	4747970	7.29545e+06	6629092	8406217	7.32829e+06	4.41345e+06	10146788	0.418508	0.00113272	0.00936704	0.980196	0.790925	0.852089	0.0137464	0.0218197
SP_0975	rnr	15900852	VacB/Rnb family exoribonuclease	Cytoplasmic	784	89.2	7.44	31	140	24	High	0	101.486	419.61	5.00879e+07	1.43885e+07	3.24011e+07	2.51597e+07	3.79699e+07	4.22686e+07	3.43419e+07	8.36107e+07	4.64903e+07	3.41853e+07	4.83085e+07	4.88147e+07	36404440	32618822	34714632	37818552	38513692	38823880	45078928	45486768	45873056	43530052	43134592	45582860	1.11007	0.0322881	0.084984	0.969281	0.152044	0.237797	2.03483e-05	9.53826e-05
SP_0976	smpB	15900853	SsrA-binding protein	Cytoplasmic	155	17.7	9.96	54	62	7	High	0	31.479	164.18	1.46174e+07	4.03786e+06	9.80383e+06	5.36286e+06	7.9627e+06	8.6498e+06	7.83058e+06	2.00589e+07	1.06187e+07	4.24915e+06	9.11157e+06	8.33465e+06	10847123	8592201	10450106	7752759	8.05792e+06	8.00096e+06	10053967	11469049	10468951	5254818	8.22297e+06	7834022	0.796657	0.0385479	0.0954285	0.666161	0.0449804	0.0971677	0.0219463	0.0329606
SP_0977	SP_0977	15900854	tellurite resistance protein TehB	Cytoplasmic	286	32.7	4.92	35	44	8	High	0	47.352	145.05	3.68468e+06	1.12253e+06	2.62673e+06	836428	1.22434e+06	1.33806e+06	2.59822e+07	6.20504e+07	3.53299e+07	1.91514e+07	30777304	23389962	2.80278e+06	2.23513e+06	2.78979e+06	1.15685e+06	1.23323e+06	1.25079e+06	34021916	34125472	34831500	24242492	27585356	21919340	0.465126	0.00063327	0.00690365	0.716139	0.00721744	0.0276668	1.12911e-10	2.33303e-08
SP_0979	SP_0979	15900856	oligoendopeptidase F	Cytoplasmic	600	69.8	4.92	35	258	24	High	0	135.507	822.93	9.34813e+07	2.72718e+07	6.45436e+07	5.92762e+07	8.6371e+07	9.96257e+07	7.45923e+07	1.95384e+08	1.07729e+08	9.79709e+07	1.40495e+08	1.45529e+08	67181256	63833400	69297920	90826560	87623432	91033520	99250608	103143312	106474944	126574280	124180192	135800448	1.34531	0.000385163	0.00525747	1.25152	0.00273196	0.0143062	1.73166e-07	2.73421e-06
SP_0980	SP_0980	15900857	O-methyltransferase	Cytoplasmic	225	25.5	5.17	35	36	8	High	0	29.332	88.91	4.4872e+06	1.04608e+06	3.34752e+06	7.45402e+06	9.01419e+06	1.02805e+07	3.62924e+06	6.95201e+06	5.07488e+06	1.36221e+07	1.91553e+07	1.86988e+07	3.40746e+06	2.08873e+06	3.55697e+06	10860601	9121732	9519023	4.60493e+06	4.1087e+06	5.01016e+06	17089578	17248112	17531910	3.25868	0.00251081	0.0149684	3.77954	2.11872e-05	0.0013807	4.2441e-06	3.0315e-05
SP_0981	prsA	15900858	foldase protein PrsA (EC:5.2.1.8)	CytoplasmicMembrane	313	34.4	5.12	79	540	34	High	0	257.884	1697.73	4.8763e+08	1.75982e+08	3.24037e+08	2.72256e+08	3.77914e+08	3.97695e+08	3.14065e+08	7.29433e+08	4.16872e+08	3.7041e+08	5.56345e+08	5.4725e+08	340354048	451387584	350349344	432001888	383788672	361316704	427322176	368999808	410685312	486794336	488843552	506203008	1.03066	0.748614	0.816543	1.2277	0.0104732	0.034802	0.0388956	0.0540843
SP_0984	SP_0984	15900859	phosphoglycerate mutase	Cytoplasmic	206	23.3	7.43	54	84	10	High	0	49.567	231.11	1.81845e+07	6.09981e+06	1.24474e+07	1.02353e+07	1.53527e+07	1.7472e+07	3.04117e+06	7.64569e+06	4.29249e+06	6.07426e+06	9.3402e+06	9.04397e+06	13468188	13241285	13234991	14981218	15597369	16131314	3.84572e+06	4508076	4239918	7542417	8429230	8499069	1.16937	0.00213627	0.0135025	1.94309	0.000381843	0.00506064	9.07339e-09	3.29941e-07
SP_0985	SP_0985	15900860	regulatory protein	Cytoplasmic	160	17.5	9.03	68	82	10	High	0	53.409	253.24	4.78073e+07	1.42472e+07	3.01703e+07	2.32517e+07	3.13692e+07	3.44822e+07	1.65594e+07	3.62309e+07	2.07711e+07	2.02668e+07	2.82759e+07	2.70191e+07	34762652	32143554	32348370	34901976	31819802	31696470	21568662	20254206	20532230	25651228	25360044	25277592	0.991574	0.837255	0.88749	1.22346	0.000500589	0.00575677	1.13974e-06	1.13032e-05
SP_0987	SP_0987	15900862	hypothetical protein	Cytoplasmic	266	30	6.65	24	31	4	High	0	19.801	97.45	271403	111123	239213	502892	913969	867548	1.6046e+06	5.12557e+06	2.4786e+06	3.55499e+06	4.55843e+06	5.01185e+06	216329	197518	251106	687674	923704	811935	2.00371e+06	3.06364e+06	2.45208e+06	4378352	4.13424e+06	4720939	3.64434	0.000305998	0.00488759	1.75991	0.0107863	0.0352682	3.37391e-08	8.99708e-07
SP_0989	SP_0989	15900864	MutT/nudix family protein	Cytoplasmic	181	20.5	4.73	62	79	11	High	0	48.196	236.14	2.82597e+07	1.01721e+07	2.24311e+07	1.62357e+07	2.01769e+07	2.21576e+07	1.56259e+07	3.76297e+07	2.30113e+07	1.58974e+07	2.35967e+07	2.35082e+07	20776442	22713080	23964906	24057414	20463160	20439964	20249580	21010866	22702136	20023166	21172856	22012650	0.963029	0.599117	0.697176	0.988213	0.805017	0.862869	0.70863	0.734331
SP_0990	SP_0990	15900865	hypothetical_protein	CytoplasmicMembrane	104	11.8	9.57	56	49	6	High	0	27.26	116.66	3.65001e+07	1.00742e+07	22046832	1.17082e+07	1.65782e+07	1.73608e+07	1.19764e+07	3.24892e+07	1.77566e+07	1.44166e+07	1.86664e+07	1.85641e+07	26673982	22479448	23535228	17240652	16813752	16039547	15512301	18249560	17572960	18109280	16801774	17438474	0.689158	0.00259911	0.0152289	1.01977	0.709332	0.78421	0.000405285	0.0010459
SP_0991	SP_0991	15900866	5'-methylthioadenosine/S-adenosylhomocysteine nucleosidase (EC:3.2.2.9)	Cytoplasmic	230	24.7	4.79	4	8	1	High	0.009	3.556	25.16	13471368	5032737	10245263	5.40042e+06	7985370	9741155	5952057	14738262	6.8547e+06	6.67389e+06	8.11009e+06	6.60154e+06	10044037	10814682	10878359	7811999	8088321	9003938	7.60701e+06	8475837	6.76759e+06	8.29884e+06	7325780	6212601	0.784705	0.00812002	0.0328748	0.955658	0.673679	0.755635	0.0076641	0.0130824
SP_0992	SP_0992	15900867	hypothetical protein	Cytoplasmic	163	19	4.94	66	104	14	High	0	75.927	278.82	4.04906e+07	1.18487e+07	2.57758e+07	2.37815e+07	3.35835e+07	3.72165e+07	2.10474e+07	5.52482e+07	2.68444e+07	2.58431e+07	3.79495e+07	3.5804e+07	29541774	26466592	27617934	35668920	34051028	34164424	27386902	30453108	26449860	32709916	33899316	33479858	1.24225	0.00351537	0.0186315	1.18744	0.0164823	0.0472708	0.000872761	0.00205759
SP_0993	SP_0993	15900868	DNA polymerase III subunit epsilon	Cytoplasmic	196	22.1	4.61	69	94	10	High	0	57.859	312.53	3.09697e+07	9.29157e+06	1.93844e+07	1.2809e+07	1.85044e+07	20111799	1.47757e+07	3.33128e+07	2.03016e+07	1.52e+07	1.97412e+07	1.91507e+07	22721312	20591040	20743414	18901942	18739748	18515408	19195178	18683640	20039024	19129746	17694352	17998810	0.876691	0.0154239	0.0510916	0.946563	0.152802	0.238108	0.00563862	0.0099359
SP_0994	SP_0994	15900869	hypothetical protein	CytoplasmicMembrane	587	68.9	7.34	7	6	3	High	0	11.07	14.24	155143	103602	278894	224656	329659	515206				330996	408682	306510	124982	184465	293314	301768	333242	482965	na	na	na	394986	376573	292415	1.85476	0.0824701	0.165084	ON	na	na	0.0628312	0.0815989
SP_1000	etrX2	15900873	surface-exposed thioredoxin-family lipoprotein 2	Cellwall	185	20.7	6.71	46	62	9	High	0	48.593	175.19	2.5927e+07	7.62119e+06	1.56735e+07	8.49819e+06	1.14598e+07	1.13455e+07	8.61336e+06	21487277	1.19668e+07	8.23614e+06	1.1007e+07	1.3191e+07	19044828	16724326	16772984	12430296	11644788	10438478	11072039	12240377	11850513	10282389	9916968	12392059	0.656874	0.00319784	0.0178406	0.926869	0.347132	0.454996	0.000520125	0.00129761
SP_1001	SP_1001	15900874	amino acid permease	CytoplasmicMembrane	463	49.9	9.19	4	16	2	High	0.002	5.066	30.52	984487	534491	1.1606e+06	1.19574e+06	1.27217e+06	1.26058e+06	1029917	1787341	1.35147e+06	1616637	1.26149e+06	1.76181e+06	767458	1.02723e+06	1.22646e+06	1.6749e+06	1.28381e+06	1.17647e+06	1.28097e+06	1.10721e+06	1.33543e+06	1.97633e+06	1.15179e+06	1.66515e+06	1.36874	0.137652	0.239914	1.28727	0.243303	0.345096	0.132365	0.158205
SP_1002	SP_1002	15900875	adhesion lipoprotein	CytoplasmicMembrane	305	33.9	5.36	47	74	12	High	0	71.507	218.8	6.5805e+06	2.12179e+06	4.80109e+06	9.90554e+06	13349916	1.57122e+07	9.80593e+06	2.64491e+07	1.51177e+07	28163076	4.13282e+07	3.591e+07	4959315	4366835	5.10386e+06	14545297	13468928	14479744	12641165	14927445	14909296	35796940	36920204	33572952	2.94483	3.66759e-05	0.00185931	2.50224	0.000119657	0.00298632	4.92389e-09	2.08339e-07
SP_1003	SP_1003	15900876	hypothetical protein	Unknown	839	93.6	5.4	34	147	22	High	0	116.223	456.58	2.46905e+07	8.94449e+06	1.72373e+07	2.93339e+07	3.91584e+07	5.38248e+07	2.79877e+07	7.17093e+07	3.78562e+07	4.18491e+07	5.50349e+07	5.96387e+07	18177968	19777578	18382246	44129852	39730844	49320936	36681768	39212352	37394876	53352028	49077260	55627900	2.36398	0.000225356	0.00406844	1.39517	0.00136304	0.00963158	4.13579e-07	5.22416e-06
SP_1004	SP_1004	15900877	hypothetical protein	Unknown	1039	114.6	5.76	16	34	10	High	0	36.09	74.47	1.93201e+06	1.03367e+06	1.67856e+06	2.9604e+06	3.62606e+06	4.59881e+06	3.52245e+06	8.63661e+06	4.0408e+06	5.3361e+06	7.02574e+06	6.90327e+06	1487122	2.047e+06	1.77888e+06	4.22124e+06	3.67244e+06	4267984	4.46323e+06	5070836	3.99302e+06	6.62353e+06	6356009	6.49388e+06	2.28904	0.00132693	0.010119	1.43959	0.00622397	0.0248995	3.026e-06	2.29823e-05
SP_1008	pepT	15900880	peptidase T (EC:3.4.11.4)	Cytoplasmic	407	44.8	4.69	63	243	26	High	0	162.615	808.05	2.14931e+08	6.54199e+07	1.4274e+08	6.91453e+07	1.00342e+08	1.14404e+08	1.294e+08	3.02863e+08	1.73266e+08	6.53032e+07	8.61939e+07	8.93418e+07	152181072	159693104	154125936	106222728	101427560	104126424	173113456	157929216	170495280	83865072	76696856	83218776	0.669049	3.38805e-05	0.00185931	0.486066	5.71996e-05	0.00239626	4.14543e-08	1.01521e-06
SP_1010	SP_1010	15900882	large conductance mechanosensitive channel protein MscL	CytoplasmicMembrane	125	13.7	9.41	10	18	1	High	0.001	9.56	70	5.25863e+06	1.04159e+06	2087342	2.00611e+06	2.96712e+06	3561594	2262324	5.66738e+06	2.76929e+06	3.26437e+06	3.67578e+06	4.50999e+06	3.98045e+06	2.06786e+06	2.21495e+06	2.84015e+06	3004256	3.30718e+06	2845670	3.37484e+06	2738582	4015911	3.34098e+06	4.25151e+06	1.1075	0.530821	0.642051	1.29571	0.0563731	0.114801	0.216307	0.246504
SP_1012	SP_1012	15900884	hypothetical protein	CytoplasmicMembrane	169	18.8	8.98	15	15	3	High	0	15.887	45.4	7.84253e+06	2.34244e+06	5.51788e+06	3.10325e+06	3.35765e+06	4.32548e+06	347034	1.49396e+06	1.09258e+06	936728	910768	1.77891e+06	5.89035e+06	4843669	5.87273e+06	4425766	3399074	4018659	424218	927300	1078409	1.13443e+06	834490	1.684e+06	0.713174	0.0279011	0.0761888	1.50331	0.279876	0.383971	0.000157162	0.000478665
SP_1013	SP_1013	15900885	aspartate-semialdehyde dehydrogenase (EC:1.2.1.11)	Cytoplasmic	358	39	5.3	58	282	17	High	0	152.446	1028.58	3.88472e+08	1.1631e+08	2.56793e+08	2.11782e+08	2.94092e+08	3.44714e+08	2.11272e+08	5.10184e+08	2.64974e+08	2.61935e+08	3.60912e+08	3.62768e+08	271728640	291414976	277644512	334712960	298444128	313419616	285357312	261242992	261077824	343051552	318273824	336457952	1.12582	0.0395174	0.0964221	1.23537	0.00466317	0.0207193	0.00170653	0.00363736
SP_1014	dapA	15900886	dihydrodipicolinate synthase (EC:4.2.1.52)	Cytoplasmic	311	33.9	5.08	34	127	10	High	0	61.313	420.69	1.145e+08	3.64179e+07	7.20929e+07	5.2723e+07	7.28622e+07	8.45215e+07	6.59849e+07	1.28293e+08	8.21938e+07	6.80692e+07	8.81244e+07	8.55765e+07	82321816	86334888	77497712	80491016	73922608	77294192	87639792	68662104	81056208	87512288	78376616	79783776	0.941311	0.205078	0.313396	1.03503	0.655346	0.743444	0.730416	0.755602
SP_1016	trmE	15900887	tRNA modification GTPase TrmE	Cytoplasmic	457	50.5	4.86	48	185	21	High	0	111.74	599.03	9.37093e+07	2.93902e+07	6.29908e+07	3.40765e+07	4.67822e+07	4.9952e+07	5.42889e+07	1.21152e+08	7.26492e+07	3.24152e+07	5.02421e+07	6.09367e+07	67322288	68997040	67680032	51545316	47440408	45853568	71882344	65028848	71596808	41207964	44820368	56836800	0.709999	0.000640184	0.00690365	0.685178	0.0191033	0.0518707	0.00110591	0.00250868
SP_1017	SP_1017	15900888	4-oxalocrotonate tautomerase	Unknown	60	6.7	7.25	72	84	3	High	0	25.627	350.68	6.20971e+07	1.90537e+07	4.4185e+07	2.14914e+07	2.86741e+07	3.5665e+07	6.36721e+07	136547435	7.86621e+07	3.3462e+07	5.01889e+07	4.14634e+07	44949932	43875772	47416400	32144084	29081694	32793416	84538472	73323216	77607560	42626828	44820368	38788344	0.690089	0.0010436	0.008882	0.536102	0.000460124	0.00545177	8.10586e-07	8.53249e-06
SP_1018	SP_1018	15900889	thymidine kinase (EC:2.7.1.21)	Cytoplasmic	199	22.8	5.99	34	27	5	High	0	20.58	63.25	2.30024e+06	1.20263e+06	957671	723108	1.51483e+06	1.74274e+06	1.74314e+06	5.00794e+06	2.17793e+06	1.90462e+06	2.77562e+06	3.27927e+06	1.76663e+06	2402988	1.01212e+06	997025	1.52662e+06	1.62209e+06	2.18191e+06	2994334	2155673	2.32307e+06	2.52843e+06	3.0958e+06	0.800067	0.566214	0.670259	1.08393	0.568443	0.671615	0.0584841	0.0766168
SP_1020	prfA	15900891	peptide chain release factor 1	Cytoplasmic	359	40.6	4.96	68	339	27	High	0	168.441	1136.74	1.2376e+08	3.95214e+07	9.08744e+07	7.32461e+07	9.49559e+07	1.21005e+08	8.14694e+07	1.7423e+08	1.14818e+08	9.10224e+07	1.23376e+08	1.03555e+08	88644024	94068136	97795368	112679912	96352056	110487952	108581808	92386112	113370632	117412560	109191288	96861080	1.13908	0.0866752	0.170427	1.02903	0.744248	0.811754	0.260656	0.290965
SP_1021	SP_1021	15900892	HemK protein	Cytoplasmic	279	31.7	4.7	15	15	4	High	0	15.966	37.04	2.59739e+06	654572	1.55072e+06	1.22589e+06	2.17978e+06	2.13204e+06	1.97195e+06	6.61022e+06	2.65276e+06	2.04843e+06	3.61784e+06	4.35651e+06	1.99265e+06	1.27282e+06	1.64071e+06	1.71779e+06	2204620	1.98371e+06	2.47516e+06	3.91425e+06	2.62003e+06	2.50911e+06	3.28685e+06	4.11064e+06	1.20381	0.255656	0.366209	1.09958	0.659362	0.745915	0.0128644	0.0205556
SP_1022	SP_1022	15900893	Sua5/YciO/YrdC family protein	Cytoplasmic	200	22.4	5.07	11	9	2	High	0.003	6.715	19.23	999702	323424	667888	487003	517142	1.02712e+06	1.1609e+06	3.26529e+06	1.6175e+06	1.28038e+06	1.86354e+06	2.0163e+06	779710	606035	704720	665286	522261	962667	1.44535e+06	1982408	1.60229e+06	1.55644e+06	1.69603e+06	1.91012e+06	1.02858	0.994242	0.997664	1.02635	0.79107	0.852089	0.000349907	0.000931016
SP_1023	SP_1023	15900894	acetyltransferase	Cytoplasmic	143	16	6.79	15	6	1	High	0.002	9.445	16.04							14428522	3.36162e+06	10660476	7770256		1.60322e+06	na	na	na	na	na	na	18668364	2.03512e+06	10567645	9687991	na	1.51433e+06	na	na	na	0.537348	0.593859	0.692442	0.593859	0.620758
SP_1025	SP_1025	15900896	hypothetical protein	Cytoplasmic	324	37.1	4.97	51	155	15	High	0	76.483	438.42	8.87816e+07	2.30299e+07	55783653	2.35145e+07	3.52889e+07	3.77717e+07	4.55406e+07	9.67093e+07	6.13737e+07	2.69759e+07	3.6473e+07	3.83236e+07	63863476	53323976	59915968	35208772	35775288	34712764	60065356	52359508	60559160	34253028	32655014	35808536	0.596808	0.000659495	0.00692884	0.593792	0.000659996	0.00639815	7.21011e-06	4.43795e-05
SP_1026	SP_1026	15900897	hypothetical protein	CytoplasmicMembrane	204	23	9.16	26	28	3	High	0	12.034	52.6	2.83173e+06	1.56762e+06	2.09787e+06	3.0162e+06	3.92147e+06	6.23422e+06	2.62418e+06	3.48408e+06	2.25618e+06	5.94494e+06	1.02142e+07	4.5482e+06	2165620	3.18611e+06	2.22559e+06	4308868	3.96606e+06	5771778	3306657	2.10534e+06	2.23472e+06	7378654	9200176	4289067	1.85378	0.0212549	0.06208	2.729	0.0217196	0.0573808	0.00536946	0.00953158
SP_1027	SP_1027	15900898	conserved_hypothetical_protein	Unknown	324	35.4	5.64	42	80	14	High	0	76.357	248.81	5.00904e+07	1.60209e+07	3.31313e+07	1.51648e+07	22717734	2.73386e+07	2.79701e+07	6.63496e+07	3.39808e+07	1.81452e+07	2.31294e+07	2.19489e+07	36404440	36433152	35467644	22538194	22997796	25110128	36681768	36353992	33549664	22834828	20727090	20519496	0.652287	0.000237268	0.00406844	0.601221	0.000328519	0.00458754	1.34024e-06	1.2184e-05
SP_1029	SP_1029	15900900	RNA methyltransferase	Cytoplasmic	543	61.8	7.17	35	110	17	High	0	84.531	302.34	4.92048e+07	1.35882e+07	3.20683e+07	2.31439e+07	3.10883e+07	3.03971e+07	2.07944e+07	5.51563e+07	2.8866e+07	2.36458e+07	3.19924e+07	3.43018e+07	35762212	30719448	34391856	34595268	31515568	27946854	27122016	30453108	28520792	29883696	28653120	32082276	0.932432	0.403145	0.516557	1.05254	0.337278	0.448557	0.171367	0.199845
SP_1032	SP_1032	15900903	iron-compound ABC transporter iron compound-binding protein	Unknown	341	37.5	5.54	70	352	27	High	0	183.715	1054.81	2.05056e+08	6.07544e+07	1.44362e+08	1.08051e+08	1.4358e+08	1.76506e+08	1.33452e+08	3.15102e+08	1.74948e+08	1.82326e+08	2.57225e+08	2.47416e+08	145227968	147924832	155207680	167796880	146096064	161322880	178566720	163971152	172465008	237099360	227076192	229280336	1.0599	0.281351	0.391473	1.34651	0.000441734	0.00539744	1.32363e-05	6.87602e-05
SP_1034	SP_1034	15900905	iron ABC transporter permease	CytoplasmicMembrane	335	36.1	9.72	6	4	2	High	0.003	7.16	10.47	222384	142575	118412	187599	175110	152840	530289	1.17654e+06	626609	1.1683e+06	1.42797e+06	1.71328e+06	177852	257678	123628	251067	176633	144336	652276	740110	620597	1.4209e+06	1.30613e+06	1.61802e+06	1.02303	0.886181	0.925055	2.15852	0.000702763	0.00657087	1.19564e-05	6.37677e-05
SP_1035	SP_1035	15900906	#REF!	CytoplasmicMembrane	264	29.6	6.25	43	29	8	High	0	30.829	92.48	4.10811e+06	998478	2.32469e+06	2.19242e+06	3.07942e+06	3.51839e+06	4.67373e+06	1.13607e+07	6.13969e+06	6.79819e+06	8.45459e+06	8.09268e+06	3.12405e+06	1.9803e+06	2.45972e+06	3.10082e+06	3.11561e+06	3.27021e+06	5.94782e+06	6629092	6066644	8462837	7630887	7609168	1.25417	0.140516	0.242852	1.27137	0.00767295	0.0285726	7.9172e-06	4.65718e-05
SP_1040	SP_1040	15900911	resolvase family site-specific recombinase	Cytoplasmic	559	64.3	8.18	15	21	6	High	0	23.371	49.67	5251983	1.432e+06	3.42848e+06	2.48386e+06	3.63039e+06	3.75952e+06	727994	1.26116e+06	957468	684496	758000	896854	3.97303e+06	2.88858e+06	3.64225e+06	3.52184e+06	3.67244e+06	3492049	900449	788558	946919	824505	695156	850865	1.01737	0.802126	0.861215	0.899314	0.267626	0.371691	1.33708e-07	2.25985e-06
SP_1041	SP_1041	15900912	hypothetical protein	Cytoplasmic	188	22	4.51	7	4	1	High	0.002	4.817	12.13	776461	172112	427680	331935	530827	425633	174325	371190	228862	199396	298409	276926	607824	312786	450727	449422	536413	399872	210420	241854	226837	235795	274930	263945	1.01048	0.860986	0.909338	1.14071	0.0981367	0.168789	0.00324586	0.00621216
SP_1045	SP_1045	15900916	hypothetical protein	Unknown	294	32.7	4.68	37	23	8	High	0	34.646	48.67	1.00843e+07	4.54246e+06	6.85331e+06	8.23112e+06	1.17156e+07	1.07572e+07	8.85879e+06	1.86738e+07	1.04227e+07	1.01009e+07	1.41739e+07	1.16629e+07	7553804	9711655	7293989	12026207	11847430	9978799	11398697	10695968	10271590	12639138	12781033	10988970	1.37839	0.0395571	0.0964221	1.12491	0.11214	0.187112	0.00811423	0.0137529
SP_1050	SP_1050	15900920	transcriptional regulator	Cytoplasmic	158	18.2	4.81	16	3	2	High	0.002	6.336	2.83	1.24149e+06	355476	804057	447896	561869	617442							963101	669205	848826	610792	567755	578110	na	na	na	na	na	na	0.708006	0.0372566	0.0942324	na	na	na	0.0372563	0.0522284
SP_1057	SP_1057	15900927	transcriptional regulator PlcR	Cytoplasmic	288	34.2	5.38	47	122	8	High	0	87.884	355.4	1.0105e+07	5.06888e+06	7.67827e+06	6.98471e+06	7.57514e+06	6.85598e+06	1.75357e+08	3.71512e+08	2.3574e+08	1.70391e+08	2.3785e+08	2.47219e+08	7553804	10904955	8181514	10159641	7672945	6352451	235974832	192570928	232527408	221256160	210391680	229280336	0.907837	0.591134	0.692726	0.999781	0.964167	0.976543	4.83616e-09	2.08339e-07
SP_1061	SP_1061	15900931	protein kinase	Cytoplasmic	448	53.4	5.76	55	127	24	High	0	124.009	358.81	2.12728e+06	45262.1	1.72454e+06	603502	3.04781e+06	1.65173e+06	5.21388e+07	1.29728e+08	7.02122e+07	6.30839e+07	7.9931e+07	9.61831e+07	1.63832e+06	77103.5	1.82141e+06	829360	3085239	1.53859e+06	68924960	69698832	69231752	81000960	71126072	89623552	1.54183	0.439603	0.554137	1.16307	0.0938011	0.162764	0.000383957	0.001006
SP_1062	SP_1062	15900932	ABC transporter ATP-binding protein	CytoplasmicMembrane	305	34.3	5.34	54	180	17	High	0	106.922	572.44	219619	2.10622e+06	4.89986e+06	283733	515091	33015.5	3.52944e+08	8.33494e+08	4.75437e+08	2.62133e+08	3.24832e+08	3.79713e+08	176278	4.34522e+06	5210620	383017	520239	31365.3	481283200	419770176	467758848	343051552	286727904	352152672	0.0960347	0.202628	0.310466	0.717361	0.0121296	0.03842	0.000102494	0.000342599
SP_1063	SP_1063	15900933	ABC transporter permease	CytoplasmicMembrane	266	30.5	9.66	29	59	8	High	0	44.44	188.69	313234	57630.6	171496	72430.3	107575	604174	7.36503e+07	1.59614e+08	9.75931e+07	8.74006e+07	7.87821e+07	1.12206e+08	249209	99214.1	179422	94514.8	108968	565988	98034680	85190808	96229304	112704416	70152952	104282024	1.45776	0.892857	0.929528	1.0275	0.95827	0.973204	4.77511e-07	5.90735e-06
SP_1067	ftsW	15900936	cell division protein FtsW	CytoplasmicMembrane	409	45.4	9.26	10	31	5	High	0	16.675	92.66	1.2673e+07	4.38809e+06	8.17563e+06	3.31207e+06	6.09613e+06	6.5222e+06	6.43501e+06	1.73218e+07	8.97529e+06	7.37481e+06	8.27687e+06	1.17036e+07	9459231	9375139	8716353	4732959	6.17378e+06	6.0391e+06	8243741	9920910	8870118	9182485	7478337	10988970	0.615078	0.00521695	0.0244296	1.02275	0.92043	0.944588	0.00432526	0.00788801
SP_1068	ppc	15900937	phosphoenolpyruvate carboxylase (EC:4.1.1.31)	Cytoplasmic	898	103.3	5.69	64	790	59	High	0	361.456	2559.37	7.74709e+08	2.70599e+08	5.27219e+08	3.38132e+08	4.98712e+08	5.19664e+08	3.26842e+08	7.63018e+08	4.35155e+08	2.9083e+08	4.29189e+08	4.28123e+08	536038016	710076288	570965568	539610560	506747968	471456768	445297408	385623520	428398880	381579424	377809920	396453472	0.835305	0.136695	0.239131	0.917831	0.137675	0.218528	0.00131348	0.00289738
SP_1069	SP_1069	15900938	hypothetical protein	Unknown	334	35.1	6.04	70	230	19	High	0	142.813	897.21	8.06364e+07	2.35146e+07	5.33035e+07	6.70537e+07	7.83229e+07	1.07739e+08	5.25223e+07	1.19603e+08	6.66953e+07	8.82846e+07	1.24742e+08	1.20939e+08	58067444	54541340	57221192	103076072	79402584	98672128	69462456	64509436	65782588	113881136	110955744	112628208	1.65548	0.00385895	0.0200403	1.6894	2.33299e-05	0.00141819	1.30758e-05	6.87602e-05
SP_1070	SP_1070	15900939	hypothetical protein	CytoplasmicMembrane	288	30.4	8.85	6	10	1	High	0.002	4.86	31.23	572821	190719	346458	145405		204961	200740	379139	421374	237936	207092	490561	451277	349149	364064	192448	na	193115	243625	246894	416828	282709	191420	466830	0.49665	0.00662057	0.02919	1.03704	0.993934	0.996128	0.18161	0.210157
SP_1071	SP_1071	15900940	ABC transporter ATP-binding protein	CytoplasmicMembrane	252	28.4	8.22	44	67	9	High	0	52.622	224.6	1.37934e+07	4.00411e+06	9.19776e+06	7.85592e+06	1.0934e+07	1.39588e+07	8.05795e+06	1.64583e+07	1.0613e+07	1.31284e+07	1.81474e+07	1.66855e+07	10263169	8502933	9807818	11472915	11036780	12919115	10354021	9477111	10468951	16452750	16266038	15663664	1.2399	0.0431228	0.101368	1.59678	0.00017626	0.0035647	6.95679e-05	0.000256078
SP_1072	dnaG	15900941	DNA primase	Cytoplasmic	586	67.2	5.3	14	23	7	High	0	22.897	35.98	4.66882e+06	1.49125e+06	3.16521e+06	1.82673e+06	3.50052e+06	4.12158e+06	1.43897e+06	4657511	1.95417e+06	1.27138e+06	2.36084e+06	1.74521e+06	3.54156e+06	3.01592e+06	3.36509e+06	2.58003e+06	3540823	3.82469e+06	1.80034e+06	2.79189e+06	1.9284e+06	1.54411e+06	2.14868e+06	1655724	1.00231	0.945419	0.966981	0.820244	0.326236	0.437342	0.00678165	0.0117262
SP_1073	rpoD	15900942	RNA polymerase sigma factor RpoD	Cytoplasmic	369	42	4.84	67	318	23	High	0	142.734	1006.24	2.38257e+08	7.74187e+07	1.74017e+08	1.26568e+08	1.78259e+08	2.05615e+08	1.48223e+08	3.06045e+08	1.97749e+08	1.46418e+08	2.02798e+08	1.88099e+08	168153200	190580688	187684720	198080016	180620992	187615488	199040576	159440128	195112512	189618064	179633712	174695584	1.03642	0.485503	0.598137	0.982576	0.867985	0.912318	0.915262	0.928329
SP_1074	SP_1074	15900943	hypothetical protein	Cytoplasmic	109	12.4	4.21	10	12	1	High	0.006	4.13	31.81	8952290	4269570	6525915	5224284	6.5301e+06	7.11172e+06	3.99203e+06	11534655	5624905	8.06362e+06	9862007	8.10601e+06	6708300	9106341	6951930	7545490	6.60933e+06	6.58281e+06	5069177	6.6853e+06	5.55323e+06	10054696	8895446	7627905	0.910881	0.465127	0.579695	1.53562	0.0197203	0.0531769	0.026911	0.0394301
SP_1075	SP_1075	15900944	glycosyl transferase CpoA	Cytoplasmic	347	39.9	8.37	33	75	11	High	0	38.052	181.52	1.31743e+07	4.52705e+06	9.46935e+06	8.14055e+06	1.20561e+07	1.30895e+07	6.33177e+06	1.70714e+07	9.4665e+06	1.13215e+07	1.55695e+07	1.61905e+07	9824814	9689193	10096845	11891543	12252814	12092516	8.10075e+06	9810025	9353743	14162898	14032707	15196418	1.22377	0.000170601	0.00342967	1.59152	0.00174224	0.0109286	3.00113e-05	0.000129545
SP_1076	lafA	15900945	group 1 glycosyl transferase	Cytoplasmic	441	50.3	6.49	33	79	15	High	0	61.225	168.7	1.89931e+07	7.45357e+06	1.28804e+07	9.78011e+06	1.49871e+07	1.26028e+07	1.01112e+07	2.42398e+07	1.30354e+07	1.20756e+07	1.89948e+07	1.92668e+07	14049295	16332933	13770823	14350011	15191931	11633172	13020820	13723263	12837288	15180009	17069570	18092188	0.932554	0.493503	0.603803	1.27186	0.0126863	0.0397889	0.0673209	0.0864937
SP_1081	murA-1	15900950	UDP-N-acetylglucosamine 1-carboxyvinyltransferase (EC:2.5.1.7)	Cytoplasmic	419	45	5.41	60	205	20	High	0	120.788	655.8	9.77093e+07	3.36157e+07	7.08757e+07	5.74776e+07	7.3621e+07	9.03648e+07	4.64266e+07	1.3165e+08	5.50496e+07	6.28265e+07	9.02746e+07	8.57321e+07	70143328	79377824	76202544	88004856	74633184	82664184	61272456	70735048	54251376	80610592	80321072	79876864	1.08674	0.244208	0.356826	1.29287	0.0266648	0.0672247	0.0131024	0.020908
SP_1082	SP_1082	15900951	acetyltransferase	CytoplasmicMembrane	183	21.8	8.35	13	14	3	High	0.002	8.312	18.43	1.87392e+06	939641	1.57293e+06	844149	1.62494e+06	1.36108e+06	506182	1.18455e+06	856226	805275	894276	837218	1.44171e+06	1.85967e+06	1.66196e+06	1.16818e+06	1.63792e+06	1.26937e+06	622285	740110	847055	972562	819015	794164	0.821115	0.182462	0.290644	1.17031	0.214352	0.31312	0.000396571	0.00103006
SP_1083	SP_1083	15900952	hypothetical protein	Cytoplasmic	425	47.6	8.28	38	112	15	High	0	73.893	292.97	2.90915e+07	8.80844e+06	2.04991e+07	1.88864e+07	2.94067e+07	2.95557e+07	1.38784e+07	3.80028e+07	1.59309e+07	1.42981e+07	2.24083e+07	2.60411e+07	21353062	19475808	21924394	28170204	29791606	27214934	18010078	21226904	15698529	17981762	20102952	24344946	1.35733	0.00234685	0.0143268	1.13642	0.36242	0.469226	0.00796242	0.0135339
SP_1084	SP_1084	15900953	methionine aminopeptidase (EC:3.4.11.18)	Cytoplasmic	286	31.6	5.03	48	200	13	High	0	90.89	713.97	1.92646e+08	6.55374e+07	1.28496e+08	9.5777e+07	1.37081e+08	1.54639e+08	9.23348e+07	232622603	1.2481e+08	8.73667e+07	1.30908e+08	1.24348e+08	136874928	159949296	137898256	148417776	138989040	141363168	123212120	122513080	123221320	112704416	116246808	115410008	0.986307	0.842118	0.891834	0.933364	0.00193417	0.011722	0.000805754	0.00191088
SP_1087	pcrA	15900955	ATP-dependent DNA helicase PcrA	Cytoplasmic	763	85.9	5.6	50	280	31	High	0	159.809	913.45	1.06309e+08	3.39315e+07	7.45836e+07	5.3515e+07	8.48461e+07	8.82743e+07	5.88413e+07	1.32913e+08	7.64658e+07	5.93817e+07	8.65118e+07	8.57614e+07	75990824	80121928	80195680	81742320	85999688	80753120	77936992	71252776	75439656	76187400	76962232	79969440	1.05157	0.128127	0.229488	1.03779	0.279777	0.383971	0.0415891	0.0571672
SP_1089	SP_1089	15900957	glutamine amidotransferase	Cytoplasmic	229	25.8	5.08	36	77	9	High	0	34.19	175.5	38367897	1.07089e+07	2.3757e+07	2.3e+07	3.98085e+07	3.93699e+07	9.36587e+06	1.93983e+07	1.22603e+07	1.07262e+07	1.50668e+07	1.40486e+07	28036782	23883108	25468814	34441852	40339548	36174740	12065448	11082754	12146555	13400734	13585771	13140151	1.43375	0.00546631	0.0253933	1.1369	0.0141726	0.0424395	4.92654e-08	1.13689e-06
SP_1090	rex	15900958	redox-sensing transcriptional repressor Rex	CytoplasmicMembrane	213	24.2	9.11	54	157	13	High	0	65.753	444.93	7.54156e+07	22262196	5.04781e+07	2.97977e+07	5.12708e+07	5.74001e+07	3.6305e+07	9.86797e+07	5.0301e+07	2.96573e+07	4.84288e+07	4.2259e+07	54386340	51621776	54203508	44901048	52005548	52604640	47750136	53405888	49618912	37728224	43223436	39533156	0.933211	0.254381	0.365951	0.799104	0.0121516	0.03842	0.00303954	0.00585466
SP_1093	SP_1093	15900961	hypothetical_protein	Unknown	115	13.5	8.92	63	153	11	High	0	55.436	417.85	1.89394e+08	6.79068e+07	1.45134e+08	8.40409e+07	1.0609e+08	1.03273e+08	1.20538e+08	2.01194e+08	1.4553e+08	8.72572e+07	1.19355e+08	1.21994e+08	134088584	166106448	156290832	129729584	107518144	94125792	162213792	106209672	143904816	112573568	105662992	113555760	0.725923	0.0449149	0.10391	0.80468	0.189095	0.284006	0.0703482	0.0898062
SP_1094	SP_1094	15900962	class-V aminotransferase	Cytoplasmic	371	40.7	6.35	20	40	4	High	0	31.679	161.31	1.72364e+07	6.03793e+06	1.11163e+07	5.3081e+06	9.09825e+06	1.01792e+07	8.19411e+06	2.19391e+07	1.14177e+07	8.38204e+06	9.96309e+06	8.62188e+06	12741143	13104607	11842240	7678718	9212903	9427058	10523670	12460440	11258444	10459530	8985066	8105701	0.698331	0.00716981	0.0305109	0.804563	0.0680292	0.13207	0.00552386	0.00974799
SP_1095	SP_1095	15900963	ribose-phosphate pyrophosphokinase (EC:2.7.6.1)	Cytoplasmic	319	35.1	6.33	46	190	14	High	0	77.492	688.3	1.84231e+08	6.65735e+07	129592734	7.03797e+07	1.21532e+08	1.44203e+08	5.34325e+07	1.62721e+08	7.71404e+07	6.22109e+07	9.63277e+07	1.06975e+08	130604520	162769712	140061392	108269432	123760416	131378000	70672320	86734504	76030968	79829784	85622912	99644016	0.838436	0.112952	0.207404	1.13562	0.227165	0.327883	0.00037931	0.000996452
SP_1096	SP_1096	15900964	hypothetical protein	Cytoplasmic	189	22.3	6.37	45	31	6	High	0	23.856	81.8	1.26435e+07	4.29555e+06	7.77654e+06	7.26019e+06	7.57019e+06	6.9964e+06	6.29486e+06	1.73446e+07	8.59819e+06	5.89985e+06	7.87831e+06	8.06757e+06	9386077	9173517	8.28847e+06	10577118	7.66283e+06	6.48145e+06	8048757	9920910	8495039	7.32829e+06	7119327	7.59042e+06	0.920789	0.529967	0.641684	0.832733	0.0516526	0.107426	0.359716	0.39349
SP_1097	SP_1097	15900965	hypothetical protein	Cytoplasmic	223	26.2	6.06	12	22	2	High	0	12.674	56	2.43025e+06	682502	1.78555e+06	1.39563e+06	2.48875e+06	2.71325e+06	1.75885e+06	4.89017e+06	2.6772e+06	2.89825e+06	3.54837e+06	3.96193e+06	1.86464e+06	1.32999e+06	1.89584e+06	1.96125e+06	2518382	2.5209e+06	2207386	2.92498e+06	2.64967e+06	3.56664e+06	3.2237e+06	3734900	1.37522	0.0849985	0.16874	1.3525	0.0301724	0.0723768	0.00204004	0.0041847
SP_1098	ppnK	15900966	inorganic polyphosphate/ATP-NAD kinase (EC:2.7.1.23)	Cytoplasmic	272	31	8.97	26	25	6	High	0	18.18	59.89	9.03165e+06	3.57195e+06	5.32313e+06	4.4603e+06	7.30105e+06	7.29292e+06	5.3607e+06	1.28511e+07	4.97383e+06	4.33711e+06	4.14056e+06	7.15275e+06	6.76718e+06	7546178	5.65911e+06	6422801	7389323	6.74864e+06	6.84145e+06	7470467	4.91142e+06	5.36767e+06	3.75578e+06	6.72825e+06	1.02946	0.732166	0.806143	0.824607	0.388737	0.49564	0.362395	0.39606
SP_1102	SP_1102	15900969	hypothetical protein	Unknown	99	10.9	4.93	42	101	4	High	0	42.546	400.02	1.92323e+08	4.84673e+07	1.25046e+08	9.33571e+07	1.29853e+08	1.47521e+08	7.96658e+07	1.7485e+08	1.02492e+08	6.7059e+07	1.12276e+08	1.01662e+08	136178800	116683632	134653648	144611872	131882392	135009232	106146480	92899480	100564176	86209280	99485832	95005632	1.0619	0.339025	0.452292	0.936887	0.316791	0.426672	0.000333645	0.000893691
SP_1105	rplU	15900972	5S ribosomal protein L21	Unknown	104	11.2	9.86	52	126	3	High	0	29.966	477.25	3.76961e+08	1.35035e+08	2.53813e+08	2.03942e+08	2.94341e+08	3.19261e+08	2.77505e+08	4.21101e+08	3.23076e+08	2.61242e+08	3.45472e+08	3.79808e+08	264161936	341708768	274390944	321788320	298444128	289910592	377605056	217038784	318171104	341723776	304255360	352152672	1.03395	0.673889	0.75626	1.09347	0.541345	0.647957	0.775471	0.796717
SP_1106	SP_1106	15900973	hypothetical protein	Cytoplasmic	114	12.8	4.21	13	12	1	High	0.002	6.298	25.63	678703	256710	540902	905891	1.50065e+06	1.88644e+06	622585	1.83658e+06	723971	1.59583e+06	2.34541e+06	1.46719e+06	533127	476765	570259	1.25611e+06	1.5165e+06	1.76122e+06	768688	1.13709e+06	716526	1.9516e+06	2.13963e+06	1.39174e+06	2.86924	0.000700023	0.00703643	2.0909	0.0187345	0.0513448	0.000205044	0.000597216
SP_1107	rpmA	15900974	5S ribosomal protein L27	Cytoplasmic	97	10.5	10.48	62	234	8	High	0	47.793	772.47	4.61148e+08	1.44239e+08	3.09923e+08	3.46376e+08	4.64505e+08	5.02587e+08	3.4628e+08	7.84245e+08	4.8561e+08	3.91751e+08	6.24537e+08	6.04153e+08	321853344	365657184	335152032	552689536	472195520	456116448	471591392	395877568	478584192	516151424	549100288	558739712	1.44818	0.00627652	0.0280399	1.20648	0.0435972	0.0952286	0.00073174	0.00175042
SP_1110	ribC,ribF	15900977	bifunctional riboflavin kinase/FMN adenylyltransferase (EC:2.7.1.26 2.7.7.2)	Cytoplasmic	305	34.5	5.62	50	105	12	High	0	65.717	309.96	5.86714e+07	2.69093e+07	4.67753e+07	3.48939e+07	4.41257e+07	4.49036e+07	3.58646e+07	6.25471e+07	4.28136e+07	3.80465e+07	5.28711e+07	4.36338e+07	42531972	62852172	50217024	52783528	44701388	41198328	47215664	34337864	42225712	48437488	47215248	40743408	0.891274	0.468868	0.582836	1.10193	0.394236	0.502105	0.391725	0.424926
SP_1111	SP_1111	15900978	hypothetical protein	CytoplasmicMembrane	282	31.2	7.99	19	18	4	High	0	15.137	38.74	4.45226e+06	1.55312e+06	3.23208e+06	1.09813e+06	1.14956e+06	1.29911e+06	6.3108e+06	3.36276e+06	3.24512e+06	938379	831807	2.10307e+06	3.37765e+06	3143522	3.42905e+06	1.53215e+06	1.16242e+06	1213637	8074745	2.03512e+06	3212743	1.13566e+06	762566	1.98548e+06	0.392775	0.000469622	0.00576399	0.291512	0.0808109	0.149043	0.020422	0.0309816
SP_1112	SP_1112	15900979	degV family protein	Cytoplasmic	279	30.6	5.3	48	96	10	High	0	53.524	322.48	5.29586e+07	1.78395e+07	3.96607e+07	2.99555e+07	3.52373e+07	3.88824e+07	3.38579e+07	6.42315e+07	4.09361e+07	3.53741e+07	4.37891e+07	4.01144e+07	38472656	40746808	42570656	45209636	35673816	35717908	44545096	35240292	40352524	45078928	39140348	37484692	0.957396	0.590865	0.692726	1.01304	0.877855	0.918576	0.935551	0.943413
SP_1113	hup	15900980	DNA-binding protein HU	Cytoplasmic	91	9.6	9.48	82	514	11	High	0	95.658	1378.24	1.15338e+09	4.47117e+08	9.81967e+08	7.68406e+08	1.01651e+09	1.12367e+09	8.14466e+08	1.50892e+09	9.9309e+08	9.30378e+08	1.05293e+09	9.71871e+08	789775872	1200673280	1066572416	1250300544	1036409856	1011648576	1124517632	745977088	977309696	1239344640	919430912	897517632	1.07895	0.574175	0.678306	1.07321	0.667024	0.751604	0.78255	0.802615
SP_1114	SP_1114	15900981	ABC transporter ATP-binding protein	Cytoplasmic	633	72	4.93	43	163	23	High	0	114.558	484.88	5.14229e+07	1.64146e+07	3.4833e+07	2.38625e+07	3.8912e+07	4.11848e+07	2.1292e+07	5.24202e+07	2.91484e+07	2.39313e+07	3.06473e+07	3.25884e+07	37331820	37389620	37296628	35822336	39426608	37819176	27784332	28958640	28718064	30268798	27407358	30498180	1.00937	0.773134	0.83858	1.03175	0.455936	0.562423	2.82298e-05	0.000122738
SP_1118	glgX	15900985	pullulanase	Cytoplasmic	759	86.5	5.35	39	292	28	High	0	181.37	905.68	1.78318e+08	6.85142e+07	1.16795e+08	9.69381e+07	1.42522e+08	1.5082e+08	1.06088e+08	2.894e+08	1.43148e+08	1.26515e+08	1.8362e+08	1.92226e+08	126421224	167647728	126001896	150163120	145081024	137732416	141809328	150869760	140949984	164622368	162923120	178398592	1.03072	0.711818	0.79121	1.16677	0.0128763	0.0400633	0.114586	0.139173
SP_1119	SP_1119	15900986	glyceraldehyde-3-phosphate dehydrogenase	Cytoplasmic	474	51.1	5.16	84	568	34	High	0	245.431	2082.42	9.30341e+08	2.89547e+08	6.50047e+08	4.27742e+08	5.25371e+08	6.14116e+08	4.76319e+08	1.01487e+09	6.16482e+08	4.04362e+08	4.90962e+08	5.18074e+08	641135168	762417088	704817728	687145216	533173600	556228928	652046528	505703040	606489856	532175840	432036992	479467776	0.842617	0.133246	0.236794	0.818302	0.109117	0.183729	0.0257397	0.0379455
SP_1121	glgB	15900988	glycogen branching protein (EC:2.4.1.18)	Cytoplasmic	642	75.6	5.76	9	18	4	High	0	17.028	47.02	3.57696e+06	1.05478e+06	2.23509e+06	1.03714e+06	1.32798e+06	1.39615e+06	1246849	2.86636e+06	1.88131e+06	1397420	1.7672e+06	1.9261e+06	2.72797e+06	2.08873e+06	2.37457e+06	1.44664e+06	1344508	1306520	1.55932e+06	1.7475e+06	1859231	1.70448e+06	1614478	1.82534e+06	0.569812	0.0025418	0.0149684	0.995789	0.965813	0.976637	0.000487404	0.00123393
SP_1123	glgD	15900990	glycogen biosynthesis protein GlgD	Unknown	379	42.6	6.84	55	198	17	High	0	116.781	688.05	6.60466e+07	1.90044e+07	4.52999e+07	2.93313e+07	4.32373e+07	4.94538e+07	5.53317e+07	1.39376e+08	7.08006e+07	7.03871e+07	9.21671e+07	8.63884e+07	47720524	43634608	48601032	44129852	43788424	45397360	73227080	74357952	69822912	90509688	82000224	80526640	0.952553	0.245883	0.358327	1.16388	0.0211783	0.0563314	3.00875e-07	4.29821e-06
SP_1124	glgA	15900991	glycogen synthase (EC:2.4.1.21)	Cytoplasmic	477	54.1	5.35	20	57	8	High	0	42.727	187.49	1.78489e+07	6.24604e+06	1.21621e+07	9.02165e+06	1.44208e+07	1.60185e+07	1.13815e+07	3.39429e+07	1.55309e+07	2.12209e+07	2.83831e+07	2.71939e+07	13177456	13583251	13020720	13209411	14583788	14755078	14724798	19008958	15303915	26804568	25449052	25464172	1.06955	0.150621	0.254897	1.58486	0.00456859	0.0205324	2.24591e-05	0.000102866
SP_1127	SP_1127	15900993	hypothetical protein	Cytoplasmic	148	17.1	5.41	49	24	4	High	0	20.959	63.93	3.62181e+06	1.14476e+06	2.72912e+06	2.17573e+06	3.46399e+06	3.90418e+06	1.40725e+06	3.30487e+06	2.18764e+06	2.99767e+06	3.53076e+06	2.52744e+06	2.7579e+06	2.27704e+06	2.8963e+06	3.08633e+06	3.50032e+06	3621424	1762250	1.99998e+06	2.16555e+06	3.69136e+06	3.20565e+06	2390310	1.28707	0.0441298	0.102297	1.56674	0.0366169	0.0827585	0.00844361	0.0142508
SP_1128	eno	15900994	phosphopyruvate hydratase (EC:4.2.1.11)	Cytoplasmic	434	47.1	4.81	95	2790	42	High	0	430.14	9564.65	8.25367e+09	3.04028e+09	5.97183e+09	4.99024e+09	6.58733e+09	7.2541e+09	5.38526e+09	1.04354e+10	6.87154e+09	5.16399e+09	6.98185e+09	6.68069e+09	5468236800	8980321280	6531012608	8494022144	6705663488	6489169408	7671125504	4817474048	6751392768	7042174464	6038480384	6122478080	1.03381	0.792357	0.854325	0.998084	0.927831	0.951351	0.823989	0.842956
SP_1151	SP_1151	15901016	exonuclease RexB	CytoplasmicMembrane	1091	124.8	5.92	4	8	3	High	0	11.356	20.69	1.36383e+06	549830	972888	816618	1.50525e+06	1.46506e+06	468179	1.69903e+06	580387	562282	1.34045e+06	1.29919e+06	1.05455e+06	1.05956e+06	1.02803e+06	1.12993e+06	1.52662e+06	1.37152e+06	574845	1.05335e+06	574111	675596	1.22444e+06	1.23138e+06	1.28195	0.0529975	0.116331	1.42188	0.275199	0.379056	0.0864873	0.108109
SP_1152	SP_1152	15901017	exonuclease RexA	Cytoplasmic	1216	140.1	5.69	18	67	17	High	0	63.376	150.82	1.10234e+07	3.03823e+06	5.84416e+06	5.16369e+06	9.48608e+06	1.15976e+07	3.78995e+06	1.10546e+07	4.94552e+06	7.03979e+06	9.85779e+06	1.01451e+07	8.21426e+06	6.37485e+06	6.21457e+06	7456708	9608045	10714245	4.81118e+06	6460385	4.89167e+06	8765750	8895446	9491607	1.33529	0.109608	0.203832	1.67991	0.00590101	0.024459	0.00601006	0.0105224
SP_1154	zmpA,iga	15901019	immunoglobulin A1 protease	Cellwall	2004	223.8	5.38	14	83	19	High	0	88.043	241.44	1.59223e+07	6.3487e+06	1.19348e+07	1.07272e+07	1.76172e+07	1.20409e+07	9.94047e+06	2.57051e+07	1.62951e+07	1.2908e+07	1.88597e+07	2.19216e+07	11794812	13811479	12699272	15733558	17827426	11081854	12811324	14544674	16093190	16198064	16980294	20519496	1.16544	0.415132	0.529589	1.23588	0.0975182	0.167972	0.143251	0.169695
SP_1156	rnhB	15901021	ribonuclease HII (EC:3.1.26.4)	Unknown	259	28.5	6.95	20	11	4	High	0	12.744	26.58	1.02755e+07	3.70686e+06	5.97659e+06	2.85113e+06	5.42938e+06	4.23585e+06	538814	4.0653e+06	1.33938e+06	1.09988e+06	984278	9.25142e+06	7.70065e+06	7857082	6.36414e+06	4.06072e+06	5.49518e+06	3.93553e+06	663529	2.44945e+06	1.32554e+06	1334749	900915	8695725	0.615432	0.0173198	0.0550268	2.46285	0.543821	0.649494	0.0656133	0.0844807
SP_1157	SP_1157	15901022	voltage-gated chloride channel family protein	CytoplasmicMembrane	516	56.4	6.96	8	5	4	High	0	14.475	12.22	1.56824e+06	197583	830481	3.03157e+06	3.7488e+06	3.93277e+06	688550	1.20233e+06	850254	2.92973e+06	3.83182e+06	4.01804e+06	1.21424e+06	362591	876384	4.32347e+06	3.79393e+06	3649148	851471	752232	841122	3.60405e+06	3.47628e+06	3791272	4.79638	0.00994603	0.0372822	4.44678	5.73898e-06	0.000708282	0.000205606	0.000597402
SP_1160	SP_1160	15901025	lipoate-protein ligase	Cytoplasmic	329	37.7	5.81	59	183	23	High	0	92.57	479.96	9.99296e+07	3.36233e+07	7.35614e+07	3.78016e+07	3.93872e+07	4.20751e+07	5.42517e+07	1.12506e+08	6.88556e+07	3.44465e+07	4.2581e+07	3.83582e+07	71694120	79377824	79116624	57278456	39933768	38641268	71882344	60868400	67950536	43788088	38074828	35901600	0.590183	0.0141343	0.047358	0.586765	0.00221234	0.0125241	0.00065102	0.00158463
SP_1161	dldh	15901026	acetoin dehydrogenase complex, E3 component, dihydrolipoamide dehydrogenase	Cytoplasmic	567	60.4	4.92	53	322	30	High	0	196.909	1124.32	2.93178e+08	1.12169e+08	2.16258e+08	9.17815e+07	1.50792e+08	154015042	1.13785e+08	2.77151e+08	1.6604e+08	6.94187e+07	1.12969e+08	9.47585e+07	206238240	280876800	233189584	142075824	153203728	140455312	152686528	144810800	163601776	89206312	100368712	88324008	0.604931	0.00617779	0.027705	0.602688	0.000726291	0.00664689	1.46895e-05	7.37546e-05
SP_1162	SP_1162	15901027	dihydrolipoamide acetyltransferase	Cytoplasmic	347	38.1	6.57	30	79	12	High	0	53.402	249.77	3.51865e+07	1.33997e+07	2.62064e+07	1.18514e+07	1.33516e+07	1.19338e+07	1.71598e+07	3.73386e+07	2.38388e+07	1.25885e+07	1.50491e+07	1.58975e+07	25740720	30245444	28047928	17542444	13570282	10989971	22360798	20848858	23491184	15816209	13496358	14916108	0.501019	0.00778563	0.0316308	0.66309	0.00205427	0.0120714	0.000522188	0.00130005
SP_1163	SP_1163	15901028	acetoin dehydrogenase, E1 component subunit beta	Cytoplasmic	330	35.8	4.97	39	91	15	High	0	63.792	213.57	5.70057e+07	1.67573e+07	3.62231e+07	1.43195e+07	2.2965e+07	2.44204e+07	2.60008e+07	6.76878e+07	3.73367e+07	1.95606e+07	2.86947e+07	2.80558e+07	41322004	38347444	38803212	21172856	23301964	22455150	34021916	37095820	36803400	24754566	25716116	26303406	0.56494	9.49718e-05	0.0029929	0.711391	0.000488432	0.00572931	4.87257e-07	5.96641e-06
SP_1164	SP_1164	15901029	acetoin dehydrogenase, E1 component subunit alpha	Cytoplasmic	322	35.1	5.24	31	41	7	High	0	38.766	120.32	3.25169e+07	1.21024e+07	2.39168e+07	9.51501e+06	1.40694e+07	1.5315e+07	1.17053e+07	2.21527e+07	1.55522e+07	8.2536e+06	7.74197e+06	8.10027e+06	23800442	27173312	25576224	13959513	14279725	14112620	15118499	12625407	15402580	10295064	6.99365e+06	7.61855e+06	0.553258	0.000109367	0.00305571	0.577272	0.0137138	0.0417827	2.43489e-05	0.000108217
SP_1167	pyrC	15901032	dihydroorotase (EC:3.5.2.3)	Cytoplasmic	422	45.3	5.4	37	151	15	High	0	72.315	464.72	5.40067e+07	1.97341e+07	3.62024e+07	2.47206e+07	3.54977e+07	4.17967e+07	3.11309e+07	7.7113e+07	4.26732e+07	2.63906e+07	3.94475e+07	3.96137e+07	39185408	45323600	38803212	37050516	35978072	38367236	40810340	42063572	42126984	33481402	35232244	37019124	0.903364	0.136964	0.239131	0.845856	0.0054646	0.0230575	0.0137212	0.0218085
SP_1169	SP_1169	15901034	uracil-DNA glycosylase	Cytoplasmic	217	24	7.02	31	31	6	High	0	23.333	64.14	6.22047e+06	3.26197e+06	4.65257e+06	4.84972e+06	8.93146e+06	9.65638e+06	4.12324e+06	7.58391e+06	5.15283e+06	6.25585e+06	8.16706e+06	8.01649e+06	4692738	6.85992e+06	4943734	6.99842e+06	9040660	8930353	5.23697e+06	4.46819e+06	5.08916e+06	7.78182e+06	7379618	7543585	1.51363	0.043704	0.101795	1.53471	0.00109721	0.00858018	0.00355865	0.00671443
SP_1170	SP_1170	15901035	hypothetical protein	Cytoplasmic	200	23.9	7.36	36	52	8	High	0	29.15	129.16	1.3112e+07	4.77958e+06	9.92753e+06	8.33341e+06	1.10261e+07	1.23728e+07	1.19059e+07	2.91641e+07	1.32024e+07	9.10077e+06	1.27372e+07	1.32068e+07	9751713	10251209	10589284	12175837	11138100	11449421	15381049	16455225	13034637	11371271	11439092	12392059	1.13635	0.0230344	0.0651897	0.784527	0.0328523	0.0770714	0.00130038	0.00287906
SP_1171	SP_1171	15901036	HAD superfamily hydrolase	Cytoplasmic	237	27.1	5.02	16	26	4	High	0	12.448	75.66	2.70911e+07	1.12683e+07	1.83348e+07	1.32006e+07	17781868	18077464	1.24751e+07	2.56003e+07	1.81825e+07	1.16222e+07	14647255	1.57772e+07	19910986	25290752	19562646	19506966	18030180	16681614	16169048	14489938	17967554	14544211	13138738	14822658	0.837169	0.141056	0.242941	0.874124	0.14266	0.225223	0.00661725	0.0114584
SP_1176	SP_1176	15901041	phosphoenolpyruvate-protein phosphotransferase	Cytoplasmic	577	63.3	4.72	64	683	33	High	0	270.641	2504.08	7.90483e+08	2.54517e+08	5.9539e+08	4.71459e+08	6.08728e+08	7.23056e+08	4.66886e+08	1.11495e+09	6.40027e+08	5.68476e+08	7.73174e+08	7.59678e+08	546222464	666137024	644950592	757910080	618553216	654449280	639525184	554026176	630099200	751762240	678203264	702428992	1.09347	0.358987	0.471903	1.1693	0.0449645	0.0971677	0.174088	0.202303
SP_1177	hpr	15901042	phosphocarrier protein HPr	Cytoplasmic	87	8.9	4.88	62	139	4	High	0	28.726	325.09	4.04777e+08	2.05694e+08	4.89556e+08	4.29088e+08	3.63574e+08	3.80255e+08	5.93713e+08	5.34079e+08	5.76977e+08	3.90804e+08	4.71414e+08	3.45577e+08	283415808	532469216	530725216	688790400	369561760	345052896	816529792	273117728	568119040	514815712	414550592	320760416	1.04218	0.924236	0.949867	0.754103	0.589087	0.68962	0.932446	0.941864
SP_1178	SP_1178	15901043	NrdH-redoxin	Unknown	72	8.2	6.54	69	30	4	High	0	19.455	82.98	9.61063e+06	4.12687e+06	6455047	8.40042e+06	1.39036e+07	1.35482e+07	5.03339e+06	1.3025e+07	7.52533e+06	1.07827e+07	1.0695e+07	1.49896e+07	7193761	8793232	6.87711e+06	12280546	14077042	12459934	6.41383e+06	7526443	7438865	13527736	9648205	14074956	1.69775	0.0036025	0.0190069	1.74239	0.0140041	0.0422284	0.000980649	0.00227177
SP_1179	nrdE	15901044	ribonucleotide-diphosphate reductase subunit alpha (EC:1.17.4.1)	Cytoplasmic	719	81.5	5.48	61	866	49	High	0	369.149	2877.35	9.76564e+08	3.1691e+08	6.79775e+08	4.7627e+08	6.91487e+08	7.50884e+08	5.0545e+08	1183364360	6.85459e+08	4.81781e+08	7.2147e+08	7.07045e+08	672939840	837090496	737481472	766147904	701906304	679670272	692416384	587763008	674367360	636482240	632862848	653626368	0.955601	0.588685	0.691655	0.983845	0.802288	0.86101	0.113625	0.138286
SP_1180	nrdF	15901045	ribonucleotide-diphosphate reductase subunit beta (EC:1.17.4.1)	Unknown	320	37	4.55	59	251	20	High	0	133.986	941.78	2.79656e+08	1.05407e+08	1.97218e+08	1.45726e+08	1.78789e+08	1.96854e+08	2.08132e+08	423013484	2.93048e+08	1.82391e+08	2.28984e+08	2.24625e+08	197248800	262481024	212599552	228471168	181636432	179458272	281236640	218034304	288640768	237099360	202485808	208932672	0.8769	0.32488	0.43692	0.823084	0.1361	0.216615	0.14271	0.169388
SP_1182	SP_1182	15901047	lactose phosphotransferase system repressor	Cytoplasmic	253	28.4	7.49	44	127	13	High	0	70.456	421.25	7.60044e+07	2.20704e+07	5.05922e+07	2.67751e+07	4.15908e+07	4.54591e+07	4.03552e+07	1.00255e+08	5.03838e+07	3.33565e+07	4.90588e+07	4.54023e+07	54811424	51135904	54311332	40278780	42165300	41746012	53233128	54085800	49717344	42497804	43844520	42418832	0.774935	0.000593115	0.00671429	0.819945	0.00210339	0.0121541	1.85971e-05	8.9033e-05
SP_1184	SP_1184	15901049	6-phospho-beta-galactosidase	Cytoplasmic	468	53.9	5.3	6	27	3	High	0.002	7.408	26.16	3.89425e+07	1.90912e+07	3.4346e+07	1.86137e+07	3.41031e+07	2.78783e+07	6.44879e+06	1.63529e+07	9.35993e+06	3.05992e+06	6.70427e+06	5.33476e+06	28395246	43875772	36758612	27712554	34558216	25659368	8256740	9421574	9245166	3766221	6059514	5021278	0.806479	0.250831	0.362415	0.551452	0.0132302	0.0408394	2.47419e-06	1.99263e-05
SP_1185	lacE-2	15901050	PTS system lactose-specific transporter subunit IIBC	CytoplasmicMembrane	563	61	6.83	3	6	2	High	0.002	7.841	12.97	23234.7		24483.6		135363	189353	427265	944879	582685	707456	1.02376e+06	1.35966e+06	19358	na	25508.1	na	136233	178113	523728	597124	577078	852623	933661	1.28799e+06	7.00631	0.0096145	0.0369984	1.8106	0.011559	0.0370457	1.49409e-06	1.32808e-05
SP_1190	lacD	15901055	tagatose 1,6-diphosphate aldolase	Cytoplasmic	326	36.4	4.92	59	262	20	High	0	121.859	778.72	7.09103e+07	2.39038e+07	4.93252e+07	3.88621e+07	5.29782e+07	6.03516e+07	6.44611e+07	1.43196e+08	8.0831e+07	7.17315e+07	91264458	9.07378e+07	51197192	55516180	52910368	58985568	53730252	55340120	85616992	76425168	79676888	92204416	81204880	84518616	1.05283	0.229763	0.342587	1.06706	0.266513	0.371225	6.5404e-06	4.08775e-05
SP_1191	lacC	15901056	tagatose-6-phosphate kinase	Cytoplasmic	309	33.4	4.83	13	4	3	High	0.002	9.46	5.6	2.15099e+06	141388	1.68155e+06	1.25204e+06	1.32448e+06	1.51317e+06	1.75294e+06	3.1176e+06	2.54596e+06	1.99694e+06	2.25343e+06	2.94072e+06	1.65342e+06	253897	1.77888e+06	1.74639e+06	1.33439e+06	1.40865e+06	2194648	1.89443e+06	2.52124e+06	2.44707e+06	2.04915e+06	2776064	1.2179	0.485143	0.598137	1.10014	0.477137	0.580583	0.217769	0.247934
SP_1192	lacB	15901057	galactose-6-phosphate isomerase subunit LacB (EC:5.3.1.26)	Cytoplasmic	171	18.9	5.76	45	54	7	High	0	38.559	151.15	1.78958e+07	6.42361e+06	1.33312e+07	1.04779e+07	1.26434e+07	1.53109e+07	1.80616e+07	4.12248e+07	2.4264e+07	2.20141e+07	2.91786e+07	2.82274e+07	13250142	13971320	14199582	15432542	12759496	14112620	23549728	22952492	23984306	27830466	26161298	26396594	1.02133	0.768316	0.83413	1.14048	0.00476213	0.0209999	5.70963e-07	6.52529e-06
SP_1193	lacA	15901058	galactose-6-phosphate isomerase subunit LacA (EC:5.3.1.26)	Cytoplasmic	141	15.2	5.55	24	23	4	High	0	14.08	69.76	2.20795e+06	1.03401e+06	2.42051e+06	2.10421e+06	2.3179e+06	2.06041e+06	4.66176e+06	8.49992e+06	5.29018e+06	4.04991e+06	5.69538e+06	4.88205e+06	1698723	2.047e+06	2.56618e+06	2.97041e+06	2.34631e+06	1.91882e+06	5934871	4.9914e+06	5.2274e+06	5.00419e+06	5160432	4.5989e+06	1.14633	0.480862	0.595207	0.913942	0.227876	0.328376	0.000133569	0.00041632
SP_1200	SP_1200	15901063	GTP-binding protein LepA	CytoplasmicMembrane	607	67.7	5.19	61	368	32	High	0	210.938	1177.92	2.43176e+08	7.67157e+07	1.67431e+08	1.05027e+08	1.52532e+08	1.63926e+08	1.22179e+08	2.97961e+08	1.71282e+08	1.26467e+08	1.74996e+08	1.7801e+08	171621024	188771376	180104928	163026544	155234944	149530016	163575920	155409584	168525824	163308528	155004000	165438480	0.865483	0.0178023	0.0559501	0.992287	0.818387	0.872698	0.0145647	0.0230272
SP_1201	SP_1201	15901064	serine/threonine protein phosphatase	Cytoplasmic	242	27.1	4.69	32	38	5	High	0	28.263	121.65	1.52629e+07	3.07754e+06	9.85822e+06	4.98193e+06	7.60575e+06	9.35019e+06	4.98784e+06	1.42879e+07	7.1082e+06	6.22988e+06	7.73386e+06	6.99599e+06	11357596	6.46292e+06	10514338	7.19052e+06	7.70335e+06	8645146	6.36202e+06	8.25279e+06	7024267	7744030	6.98466e+06	6.58761e+06	0.830744	0.43712	0.552201	0.985084	0.90398	0.933053	0.326438	0.359052
SP_1202	SP_1202	15901065	DNA repair protein RecN	Cytoplasmic	555	62.8	5.06	33	64	13	High	0	56.516	148.53	8.89613e+06	3.27857e+06	6.45729e+06	6.70059e+06	7.06014e+06	8.33693e+06	4.725e+06	9.29381e+06	5.37228e+06	6.1464e+06	7.43218e+06	6.27189e+06	6671493	6904107	6.87711e+06	9742584	7.14619e+06	7.71559e+06	6025440	5.43914e+06	5306384	7.6432e+06	6.71529e+06	5.90314e+06	1.20299	0.133831	0.236794	1.20814	0.0926363	0.162261	0.0196148	0.0299462
SP_1203	SP_1203	15901066	transcriptional repressor	Cytoplasmic	143	16.2	5.07	78	76	10	High	0	56.504	274.68	2.91853e+07	9.35449e+06	1.86307e+07	1.72643e+07	2.45273e+07	2.92144e+07	4.27675e+06	8.92041e+06	5.45602e+06	1.27595e+07	1.65449e+07	1.67427e+07	21425110	20730686	19884682	25731198	24822798	26848986	5.44363e+06	5.2296e+06	5395253	16070766	14836971	15663664	1.24762	0.00211803	0.0134952	2.89831	2.30144e-06	0.000492095	6.9908e-11	2.10943e-08
SP_1205	SP_1205	15901068	geranyltranstransferase	Cytoplasmic	291	31.8	4.82	12	3	2	High	0.003	6.359	7.62	570534	120709	478599	475728	683450	707227	451381	594548	656609	558296	900019	1.03696e+06	449731	216236	504661	649906	690098	661997	553642	381815	650268	670722	824477	985950	1.71019	0.0870856	0.170946	1.56468	0.0760066	0.141939	0.0406807	0.0562406
SP_1206	xseB	15901069	exodeoxyribonuclease VII small subunit (EC:3.1.11.6)	Cytoplasmic	70	7.8	4.41	33	31	2	High	0.002	9.193	75.98	1.03546e+07	3.84626e+06	7.42871e+06	6.47223e+06	8.51838e+06	1.0026e+07	7.79292e+06	1.82345e+07	1.0895e+07	8.47958e+06	1.21606e+07	1.19027e+07	7.77407e+06	8168580	7914156	9400351	8625274	9243106	10001812	10419390	10765032	10586098	10991564	11176087	1.14302	0.011391	0.040677	1.05026	0.138307	0.219234	1.53081e-05	7.59078e-05
SP_1207	xseA	15901070	exodeoxyribonuclease VII large subunit (EC:3.1.11.6)	Cytoplasmic	446	50.5	9.35	34	57	11	High	0	51.405	147.76	1.24337e+07	3.62602e+06	6.74685e+06	5.6071e+06	8.04984e+06	8.67888e+06	5.96691e+06	1.49328e+07	7.61035e+06	8.48524e+06	1.15562e+07	1.24854e+07	9239757	7679342	7187082	8123181	8149105	8.02857e+06	7632982	8587278	7.51785e+06	10598764	10454352	11737376	1.00808	0.863844	0.910451	1.38134	0.00436644	0.019701	0.00318872	0.00611256
SP_1208	SP_1208	15901071	uridine kinase (EC:2.7.1.48)	Cytoplasmic	212	24.5	5.87	35	47	6	High	0	37.486	108.18	1.07581e+07	3.49129e+06	7.3073e+06	7.66719e+06	1.09368e+07	1.10612e+07	7.80289e+06	1.82008e+07	1.04748e+07	9.70666e+06	1.18183e+07	1.42197e+07	8.06758e+06	7368785	7.78582e+06	11189065	11036780	10254620	10014855	10419390	10370280	12144421	10633429	13327120	1.39868	0.000888859	0.00842609	1.17207	0.0812436	0.149367	0.000239382	0.000682323
SP_1213	SP_1213	15901076	hypothetical protein	Cytoplasmic	424	49.1	5.26	41	148	18	High	0	89.762	387.16	5.8828e+07	1.94378e+07	4.22976e+07	2.89735e+07	5.02543e+07	5.15815e+07	2.40953e+07	6.23721e+07	3.5236e+07	2.49012e+07	3.5943e+07	3.66421e+07	42603104	44599368	45370100	43667196	50991140	47313640	31497926	34284748	34732856	31553342	32121540	34224984	1.0709	0.240576	0.353289	0.973978	0.544111	0.649494	5.04495e-05	0.000201128
SP_1219	gyrA	15901081	DNA gyrase subunit A	Cytoplasmic	822	92	6.19	48	475	45	High	0	235.208	1444.65	2.61366e+08	7.59899e+07	1.74821e+08	1.09623e+08	1.68858e+08	1.74581e+08	1.14488e+08	2.81114e+08	1.50273e+08	1.03552e+08	1.39949e+08	1.55475e+08	184096752	186964032	188768048	170979296	171481648	159509104	152686528	146831616	147844288	134435008	124180192	144138528	0.896649	0.0114426	0.040677	0.900285	0.0753632	0.141216	8.99963e-05	0.000314856
SP_1220	ldh	15901082	L-lactate dehydrogenase (EC:1.1.1.27)	Cytoplasmic	328	35.3	5.22	70	828	22	High	0	204.198	3054.44	2.86802e+09	1.15955e+09	2.18629e+09	1.46913e+09	1.96168e+09	2.23575e+09	1.46714e+09	3.20205e+09	1.92127e+09	1.40401e+09	1.7768e+09	1.67329e+09	1938799104	3266767360	2386229760	2430450944	1992531072	2016454016	2049749632	1541750272	1888700544	1876315648	1553406592	1538821120	0.84821	0.426731	0.540834	0.906635	0.421599	0.531187	0.0771346	0.0974331
SP_1225	SP_1225	15901087	vicX protein	Cytoplasmic	269	29.9	6.24	39	35	6	High	0	30.859	144.37	8.15796e+06	2.47104e+06	6.39901e+06	6.76287e+06	7.81967e+06	9.70722e+06	5.5763e+06	1.43638e+07	7.32182e+06	9.25769e+06	1.20212e+07	1.00692e+07	6126358	5126486	6812968	9831947	7.9161e+06	8976339	7.12675e+06	8.30858e+06	7231567	11573968	10812497	9491607	1.47928	0.0192739	0.058737	1.40637	0.0110357	0.0357594	0.00142684	0.00310182
SP_1226	hk2	15901088	sensory box sensor histidine kinase	CytoplasmicMembrane	449	51.7	5.34	17	36	7	High	0	21.236	74.69	3.77769e+06	1.39888e+06	3.08947e+06	3.20407e+06	4.96811e+06	5.51349e+06	4.17524e+06	1.03827e+07	5.41332e+06	5.01969e+06	7.35351e+06	7.89677e+06	2877554	2.82501e+06	3.27984e+06	4.57199e+06	5.02932e+06	5.1078e+06	5314442	6066151	5.34589e+06	6.22125e+06	6643446	7.43113e+06	1.63755	0.00106704	0.00894759	1.21339	0.0461957	0.098344	7.56355e-06	4.53813e-05
SP_1227	rr2	15901089	DNA-binding response regulator	Cytoplasmic	234	26.8	5.08	79	111	13	High	0	80.791	359.15	2.3302e+07	6.8283e+06	1.56492e+07	1.95341e+07	3.01219e+07	3.74111e+07	1.64862e+07	3.7325e+07	2.32707e+07	3.62654e+07	5.40253e+07	4.69475e+07	17165684	14909264	16665778	29086230	30501460	34347216	21436758	20848858	22998024	46241196	48190664	43814732	1.92724	0.000559327	0.00652175	2.11763	4.82389e-05	0.00209571	3.11339e-07	4.34426e-06
SP_1228	SP_1228	15901090	A/G-specific adenine glycosylase	Cytoplasmic	391	45.3	4.97	9	20	4	High	0	12.426	37.82	2.24022e+06	737469	1.74056e+06	1.39206e+06	2.14623e+06	2.21518e+06	1.40409e+06	3.72813e+06	2.14711e+06	767051	1.67631e+06	1.9228e+06	1.72136e+06	1.44057e+06	1.84267e+06	1.9469e+06	2174259	2.06711e+06	1.74956e+06	2.25137e+06	2.12603e+06	926027	1.5329e+06	1.81592e+06	1.23651	0.0537587	0.117383	0.697711	0.143396	0.225776	0.109414	0.133568
SP_1229	SP_1229	15901091	formate--tetrahydrofolate ligase	Cytoplasmic	556	59.6	5.44	57	572	34	High	0	240.684	2029.79	5.89671e+08	1.93756e+08	4.4466e+08	3.59585e+08	4.46685e+08	5.44971e+08	2.92053e+08	6.65078e+08	3.90613e+08	3.33573e+08	4.85735e+08	4.77079e+08	410088736	499960288	481801344	575596928	453903296	494009312	396927328	337638464	385096320	438803520	427666688	441657216	1.09459	0.389153	0.503051	1.16832	0.0355485	0.0816016	0.0195006	0.0298098
SP_1230	SP_1230	15901092	phosphopantothenate--cysteine ligase	Cytoplasmic	229	25.7	6.44	48	66	8	High	0	56.06	239.07	1.79475e+07	3.65975e+06	1.09853e+07	1.12932e+07	1.77078e+07	2.06388e+07	7.15956e+06	2.10929e+07	9.90004e+06	1.67569e+07	2.19166e+07	1.97348e+07	13250142	7.74598e+06	11735108	16637385	17928772	18973740	9180731	12020174	9778131	21172856	19657080	18465730	1.63574	0.0365791	0.09272	1.91406	0.00193868	0.011722	0.00197922	0.00409495
SP_1231	SP_1231	15901093	phosphopantothenoylcysteine decarboxylase (EC:4.1.1.36)	Unknown	183	19.9	6.89	52	67	7	High	0	35.455	193.53	1.87845e+07	5.91134e+06	1.43607e+07	1.49313e+07	2.08418e+07	2.13867e+07	9.62911e+06	2.39892e+07	1.27197e+07	1.31603e+07	1.87451e+07	1.83087e+07	13904064	12808736	15378871	22082780	21071440	19706892	12405577	13613634	12541268	16580107	16801774	17158316	1.49343	0.00295649	0.0168983	1.31067	0.000937289	0.00789769	4.12094e-05	0.000169354
SP_1235	SP_1235	15901097	MutT/nudix family protein	Cytoplasmic	155	18	4.54	27	24	4	High	0	16.071	67.1	1.10641e+07	2.74335e+06	7.32013e+06	4.47742e+06	6.46898e+06	6.03306e+06	3.81068e+06	7.63318e+06	5.49843e+06	4.88832e+06	6.41085e+06	5.97576e+06	8287593	5716217	7796498	6.4523e+06	6548554	5587379	4836973	4.49668e+06	5434748	6057944	5798876	5.63114e+06	0.852659	0.300792	0.410683	1.18415	0.0439734	0.0955199	0.0288891	0.0416169
SP_1236	SP_1236	15901098	acetyltransferase	CytoplasmicMembrane	162	18.9	6.58	17	13	3	High	0	10.053	31.28	5.31118e+06	1.65664e+06	3.51407e+06	2.09421e+06	3.22224e+06	3.19636e+06	3.71678e+06	9.02503e+06	5.68101e+06	3.85687e+06	6.36114e+06	5269027	4017609	3.37808e+06	3.72754e+06	2.95594e+06	3.25735e+06	2.9743e+06	4720939	5.29193e+06	5612477	4.76623e+06	5.75393e+06	4964965	0.825982	0.0327914	0.0859209	0.991026	0.904417	0.933053	0.00012114	0.000387649
SP_1237	SP_1237	15901099	acetyltransferase	Unknown	187	22.5	8.4	11	4	2	High	0.002	5.693	0	3.1913e+06	808732	2.01688e+06	1.2098e+06	1.79078e+06	1.97771e+06	958095	2.86578e+06	1.13964e+06	726850	1.3218e+06	1.45895e+06	2.43585e+06	1.58864e+06	2.14047e+06	1.68919e+06	1.80994e+06	1.84467e+06	1190066	1.7475e+06	1.12784e+06	877082	1.20628e+06	1382313	0.866803	0.378011	0.491373	0.852479	0.460028	0.56504	0.0277997	0.040387
SP_1238	SP_1238	15901100	excinuclease ABC subunit B	Cytoplasmic	662	75.7	4.96	41	163	25	High	0	111.105	479.98	4.05359e+07	1.19384e+07	2.76245e+07	1.84689e+07	2.58412e+07	2.93163e+07	1.38766e+07	3.30597e+07	1.83279e+07	1.70425e+07	2.31406e+07	22612406	29541774	26702054	29552804	27560018	26140968	26940498	18010078	18575150	18066186	21428382	20727090	21172856	0.939914	0.174695	0.280788	1.15877	0.00043859	0.00539744	6.95532e-07	7.65723e-06
SP_1240	SP_1240	15901101	hypothetical protein	CytoplasmicMembrane	317	35.2	9.86	6	5	2	High	0.002	5.191	0	2.84325e+06	727986	1.83283e+06	841574	1.32568e+06	1.50158e+06	938122	2.5764e+06	1.26385e+06	827455	1.12043e+06	1.33435e+06	2.17313e+06	1422116	1.93838e+06	1165346	1344508	1.39937e+06	1.16483e+06	1576515	1.24646e+06	999516	1.02458e+06	1.25968e+06	0.706449	0.0725777	0.149515	0.823454	0.17887	0.271078	0.0238105	0.0353621
SP_1241	SP_1241	15901102	amino acid ABC transporter amino acid-binding protein/permease	CytoplasmicMembrane	721	78.3	8.59	47	414	41	High	0	241.801	1289.97	1.78114e+08	5.63006e+07	1.14782e+08	9.96228e+07	1.34732e+08	1.42498e+08	1.26029e+08	2.9853e+08	1.55778e+08	1.17281e+08	1.58176e+08	1.65405e+08	126421224	136454496	123839792	154447808	136958816	129562464	169025040	155913760	153753424	151486912	140037712	153401008	1.08858	0.23637	0.348949	0.929461	0.149599	0.234598	0.017452	0.0270574
SP_1242	SP_1242	15901103	amino acid ABC transporter ATP-binding protein	CytoplasmicMembrane	246	27.3	5.1	64	125	12	High	0	89.458	550.04	1.03059e+08	3.47762e+07	7.80885e+07	5.15264e+07	7.74689e+07	7.43786e+07	7.44785e+07	1.72282e+08	1.02969e+08	4.91477e+07	6.86644e+07	5.80207e+07	73878224	82355808	83973520	78615088	78590920	68097968	99115688	91359544	101549240	62809952	61214896	54140280	0.937955	0.357115	0.469973	0.610103	0.000895909	0.00767081	0.000242081	0.000685815
SP_1243	zwf	15901104	glucose-6-phosphate 1-dehydrogenase (EC:1.1.1.49)	Cytoplasmic	495	56.8	5.66	59	315	28	High	0	152.327	919.84	2.67637e+08	7.87051e+07	1.8975e+08	8.17109e+07	1.11972e+08	1.16233e+08	1.07018e+08	2.58216e+08	1.35777e+08	6.56675e+07	7.98652e+07	9.27606e+07	188944720	193941648	205014576	126094344	113608384	105944120	143167584	135197920	134055904	84385920	71126072	86467696	0.587934	0.000680747	0.00702435	0.586729	0.0011637	0.00880657	3.37806e-06	2.51781e-05
SP_1244	SP_1244	15901105	signal recognition particle-docking protein FtsY	CytoplasmicMembrane	429	47.8	4.46	35	251	19	High	0	101.472	773.15	1.77836e+08	5.1261e+07	1.18914e+08	7.37326e+07	1.12849e+08	1.23948e+08	6.65766e+07	1.71729e+08	8.55165e+07	7.59125e+07	1.06068e+08	1.03175e+08	126421224	123763944	128164872	113468264	114624016	113213904	88448904	91359544	84307760	97683120	94189680	95933296	0.902091	0.000689533	0.00703643	1.08969	0.0279613	0.0691954	3.25066e-07	4.38291e-06
SP_1245	SP_1245	15901106	Cof family protein	Cytoplasmic	272	30.3	4.55	45	102	8	High	0	61.221	363.99	6.88815e+07	2.84245e+07	4.22298e+07	3.02741e+07	4.97651e+07	5.91505e+07	1.8573e+07	4.75055e+07	2.57998e+07	2.47359e+07	3.31721e+07	2.77786e+07	49778740	66535856	45262480	45672484	50483760	54245896	24210680	26336842	25463642	31296364	29720678	26023642	0.930838	0.657193	0.742223	1.1451	0.0913155	0.161558	0.000118661	0.000382873
SP_1246	SP_1246	15901107	Cof family protein	Cytoplasmic	264	29.6	4.81	26	63	8	High	0	40.303	147.12	8.52251e+06	3.34203e+06	6.27778e+06	6.19107e+06	8.9302e+06	1.03168e+07	8.46681e+06	2.26536e+07	1.07457e+07	1.04652e+07	1.8084e+07	1.7612e+07	6391665	7.03673e+06	6684713	8984059	9040660	9519023	10889210	12900150	10567645	13146818	16266038	16504459	1.36944	0.000696058	0.00703643	1.33648	0.0399343	0.0885499	2.09844e-05	9.76019e-05
SP_1247	smc	15901108	Chromosome partition protein smc	Cytoplasmic	1179	134	4.97	37	221	39	High	0	173.969	546.62	3.70622e+07	1.35353e+07	2.68141e+07	2.08899e+07	3.60644e+07	3.52564e+07	1.99105e+07	5.09985e+07	2.782e+07	2.44929e+07	3.36446e+07	3.63037e+07	27104422	30482412	28692786	31225864	36586520	32427814	25930376	28210442	27436050	31039400	30076390	33945612	1.16181	0.0639764	0.134166	1.1653	0.0256467	0.0655854	0.0163961	0.0255524
SP_1248	rnc	15901109	ribonuclease III (EC:3.1.26.3)	Cytoplasmic	232	26.2	6.1	38	37	9	High	0	39.326	100.92	1.62848e+07	4.31397e+06	1.00463e+07	5.90844e+06	1.12469e+07	1.16719e+07	6.71893e+06	1.5495e+07	8.76749e+06	5.67819e+06	7.61951e+06	8.07923e+06	12086145	9195904	10664213	8568197	11340786	10806148	8607951	8921327	8662848	7.0513e+06	6885900	7599800	0.961462	0.747722	0.816543	0.82227	0.00344778	0.0163074	0.007335	0.0125743
SP_1249	SP_1249	15901110	guanosine 5'-monophosphate oxidoreductase (EC:1.7.1.7)	Cytoplasmic	328	35.9	6.76	59	216	19	High	0	123.84	673.83	8.08928e+07	2.75212e+07	5.39362e+07	4.30519e+07	5.51755e+07	5.62355e+07	1.06842e+08	2.06858e+08	1.37885e+08	7.62671e+07	1.00988e+08	9.62983e+07	58279756	64324412	57867848	65514092	55962260	51510180	143167584	109272840	136025472	98204680	89774328	89716296	0.958523	0.58706	0.690728	0.714851	0.0200608	0.053971	3.02657e-05	0.000130175
SP_1250	SP_1250	15901111	hypothetical protein	Cytoplasmic	438	51.3	9.04	26	34	8	High	0	29.392	64.98	4.8704e+07	1.8007e+07	3.75096e+07	3.13465e+07	4.54846e+07	4.53931e+07	3.43573e+07	3.58014e+07	4.3658e+07	4.23432e+07	4.83803e+07	4.07329e+07	35405236	41227424	40202344	47216232	46121480	41654764	45212464	20037856	43112908	53999108	43223436	38043444	1.15541	0.0754202	0.153473	1.24826	0.387922	0.495138	0.506368	0.534896
SP_1251	SP_1251	15901112	endonuclease	Cytoplasmic	643	74.6	5.06	39	214	29	High	0	135.294	520.62	2.3496e+08	1.00407e+08	2.20028e+08	1.63726e+08	3.7259e+08	3.09259e+08	6.88183e+07	197051833	1.05873e+08	5.23209e+07	7.99968e+07	8.00527e+07	166071072	249377504	237524592	257350688	378707008	280866336	91417440	104165992	104504848	66962240	71214456	74676792	1.40423	0.120714	0.219241	0.709303	0.00320781	0.0156782	1.18173e-05	6.3307e-05
SP_1260	SP_1260	15901120	copper homeostasis protein CutC	Cytoplasmic	210	23	5.08	42	60	7	High	0	40.526	208.02	7.88082e+06	2.90751e+06	7.97642e+06	3.95125e+06	4.5205e+06	6.91462e+06	1.24369e+07	2.39701e+07	1.72998e+07	1.02128e+07	1.22609e+07	1.18135e+07	5.91986e+06	6.08903e+06	8502401	5.67192e+06	4.57362e+06	6398525	16037680	13613634	17079692	12766012	11081063	11082535	0.811458	0.250363	0.362188	0.747461	0.0248034	0.0642261	9.81233e-05	0.000332376
SP_1261	SP_1261	15901121	hypothetical protein	CytoplasmicMembrane	119	13.7	9.74	8	13	1	High	0.002	7.296	29.06	2.69367e+06	529909	1.63087e+06	936010	1.30563e+06	1.5603e+06	844672	2.27055e+06	1.32789e+06	1.01397e+06	1.83173e+06	2.2216e+06	2.06037e+06	1.01916e+06	1.72573e+06	1.29872e+06	1.32428e+06	1.45507e+06	1.04762e+06	1393027	1.31566e+06	1.22409e+06	1.66885e+06	2.09848e+06	0.848666	0.595523	0.696391	1.32881	0.208635	0.306678	0.55311	0.581711
SP_1263	SP_1263	15901123	DNA topoisomerase I (EC:5.99.1.2)	Cytoplasmic	699	79.1	9.14	45	173	26	High	0	139.008	498.97	5.09853e+07	1.67113e+07	3.52854e+07	3.0049e+07	4.16866e+07	4.57134e+07	2.49463e+07	6.31709e+07	3.36184e+07	3.0541e+07	4.57708e+07	4.49143e+07	37046528	38107952	37834752	45209636	42266716	41928608	32560354	34709600	33155276	38758756	40915864	41953520	1.14529	0.00595693	0.0270264	1.21113	0.00315	0.0155334	9.86049e-05	0.000332376
SP_1264	SP_1264	15901124	hypothetical protein	CytoplasmicMembrane	347	38.8	8.38	10	19	4	High	0	13.156	44.76	1.45747e+06	556050	1.22321e+06	1.4946e+06	2.17639e+06	2.45797e+06	2.32723e+06	6.49956e+06	3.06026e+06	3.93809e+06	4.19623e+06	4774865	1.13064e+06	1071694	1.29016e+06	2.09042e+06	2204620	2289430	2935215	3.85126e+06	3.02506e+06	4.86639e+06	3.80985e+06	4495635	1.88532	0.00048013	0.00582268	1.34249	0.0571613	0.115867	2.5826e-06	2.03889e-05
SP_1267	licC	15901127	licC protein	Cytoplasmic	229	26.9	4.72	66	274	18	High	0	95.543	852.6	1.38016e+08	4.21971e+07	9.03724e+07	8.20065e+07	1.27625e+08	1.32009e+08	147477643	3.51e+08	2.07288e+08	1.70855e+08	2.58283e+08	2.66212e+08	98462288	100828416	97255584	126568440	129852136	120481192	197675040	182052112	203975024	222575792	227954000	246845680	1.27097	0.000604518	0.00677758	1.19475	0.0181463	0.0502018	4.54894e-08	1.09174e-06
SP_1269	pck,licA	15901129	choline kinase	Cytoplasmic	289	33.4	4.79	67	196	26	High	0	131.431	604.15	1.70976e+08	4.71534e+07	1.09432e+08	8.83335e+07	1.22403e+08	1.43228e+08	4.4171e+07	1.13943e+08	6.31525e+07	6.2229e+07	8.20939e+07	8.70336e+07	121537448	113402752	117353784	136533024	123760416	130470080	58322708	61388884	62333240	79829784	73071672	81083624	1.1092	0.0410047	0.0975743	1.28532	0.00278379	0.014385	8.80985e-08	1.70513e-06
SP_1270	tarI	15901130	zinc-containing alcohol dehydrogenase	Cytoplasmic	340	38.7	5.83	52	208	18	High	0	113.204	600.4	6.01516e+07	1.7161e+07	3.68073e+07	2.6825e+07	4.08753e+07	5.00727e+07	1.26829e+08	3.11362e+08	1.71601e+08	1.53411e+08	2.38364e+08	2.18218e+08	43598928	39306320	39448996	40278780	41455244	45944884	170387488	161958240	169510480	198839184	210391680	202456896	1.04352	0.46652	0.580536	1.21885	0.00103301	0.00824304	1.79784e-10	2.69676e-08
SP_1271	ispD	15901131	2-C-methyl-D-erythritol 4-phosphate cytidylyltransferase (EC:2.7.7.6)	Cytoplasmic	235	26.2	5.36	55	210	11	High	0	73.409	539.47	1.2911e+08	3.70577e+07	8.3964e+07	5.37016e+07	8.16968e+07	8.71374e+07	2.39829e+08	5.53416e+08	3.18072e+08	2.31625e+08	4.24402e+08	3.67692e+08	92152904	88078128	90343392	82055072	82853456	79660968	325235872	282506112	313249664	303258144	373433408	341073792	0.90389	0.00459851	0.0224346	1.10508	0.253127	0.35559	4.25642e-09	2.08339e-07
SP_1272	tacF	15901132	polysaccharide biosynthesis protein	CytoplasmicMembrane	495	56.5	9.42	9	23	5	High	0	21.433	64.59	5.43775e+06	1.36393e+06	2.92071e+06	3.46429e+06	4.8951e+06	6.7923e+06	2.89752e+06	7.32927e+06	3.69854e+06	3.52985e+06	4896039	5.32744e+06	4114178	2.74035e+06	3098703	4952682	4.95844e+06	6287937	3665894	4.32566e+06	3.65722e+06	4353335	4440461	5021278	1.62752	0.0263715	0.0732123	1.18597	0.0736645	0.138697	0.0121363	0.0195484
SP_1273	licD1	15901133	licD1 protein	Cytoplasmic	267	31.9	6.19	27	50	7	High	0	34.249	122.22	1.19285e+07	4.52005e+06	8.26737e+06	6.78794e+06	8.25648e+06	9.82119e+06	6.55805e+06	1.56664e+07	8.64562e+06	9.18816e+06	1.17029e+07	1.13466e+07	8873771	9666761	8812630	9876589	8.36185e+06	9077541	8399814	9032564	8544411	11485292	10543898	10614718	0.998641	0.963221	0.976857	1.25666	0.00290043	0.0146699	0.00591216	0.0103722
SP_1274	licD2	15901134	licD2 protein	Cytoplasmic	269	32.1	7.56	48	128	14	High	0	67.987	309.01	4.8016e+08	1.57239e+08	3.69936e+08	2.89637e+08	327722967	360507956	2.68805e+08	4.7749e+08	3.65303e+08	2.0674e+08	3.99135e+08	3.39893e+08	334873952	400382560	400303456	461291776	332986496	327882656	365191776	244885312	359508256	270150816	351551552	315219712	0.9882	0.874743	0.917222	0.966312	0.882775	0.921232	0.427945	0.458513
SP_1275	carB	15901135	carbamoyl phosphate synthase large subunit (EC:6.3.5.5)	Cytoplasmic	1058	116	4.89	44	298	40	High	0	213.326	937.02	7.92855e+07	2.36689e+07	5.23801e+07	7.20333e+07	9.09173e+07	1.09954e+08	4.44553e+07	1.06685e+08	6.30176e+07	9.36432e+07	1.2703e+08	1.39766e+08	57147608	55028684	56251052	110789216	92190752	100490448	58724760	57741232	62136172	120814216	112719264	130240800	1.80179	0.00041498	0.00543671	2.03679	0.000114209	0.00291233	6.87806e-07	7.64229e-06
SP_1276	SP_1276	15901136	carbamoyl phosphate synthase small subunit (EC:6.3.5.5)	Cytoplasmic	359	39.8	6.42	34	81	9	High	0	59.072	257.94	24371349	6.58327e+06	1.90241e+07	2.60684e+07	3.36383e+07	4.67416e+07	2.04061e+07	4.41906e+07	2.56056e+07	3.54982e+07	4.83602e+07	4.78484e+07	17961144	14337003	20314004	39202064	34051028	42841676	26592338	24566144	25266410	45208096	43223436	44652432	2.20662	0.00283186	0.0162658	1.74137	3.20414e-05	0.00163411	2.13435e-05	9.86033e-05
SP_1277	pyrB	15901137	aspartate carbamoyltransferase (EC:2.1.3.2)	Cytoplasmic	307	34.7	5.2	44	160	14	High	0	63.521	440.23	4.82954e+07	1.80581e+07	3.90518e+07	4.09566e+07	6.04143e+07	6.96653e+07	3.51341e+07	7.74275e+07	4.48786e+07	5.05511e+07	7.00116e+07	7.19225e+07	35119624	41467760	41924740	62247952	61238428	63816444	46147112	42221816	44295920	64755820	62365756	67059804	1.58045	0.00140804	0.0105242	1.4637	0.000326581	0.00458754	1.15435e-05	6.21172e-05
SP_1278	pyrr	15901138	bifunctional pyrimidine regulatory protein PyrR/uracil phosphoribosyltransferase (EC:2.4.2.9)	Cytoplasmic	173	19.6	5.52	79	152	15	High	0	78.736	448.7	4.85351e+07	1.57514e+07	37527543	3.85691e+07	6.03807e+07	6.07757e+07	3.37262e+07	7.3472e+07	4.14628e+07	4.42867e+07	6.3692e+07	6.24891e+07	35262472	35955248	40202344	58520012	61238428	55704848	44278076	40163608	40944088	56588600	56787208	58323988	1.57479	0.000757103	0.00741834	1.36937	0.000548058	0.00596028	7.41107e-06	4.49156e-05
SP_1279	SP_1279	15901139	endonuclease III	CytoplasmicMembrane	209	23.3	7.5	11	14	2	High	0.002	6.159	37.85	1.296e+06	373995	1.10674e+06	1.24956e+06	1.5271e+06	2132132	967789	2.33852e+06	1.12021e+06	1001474	1.72483e+06	1.5908e+06	1.00884e+06	706848	1.17339e+06	1.74639e+06	1.54686e+06	1.98371e+06	1.20268e+06	1.43453e+06	1.10807e+06	1.2118e+06	1.56916e+06	1.5049e+06	1.82651	0.0205226	0.0612004	1.14434	0.290699	0.3965	0.0140104	0.0222093
SP_1280	SP_1280	15901140	conserved_hypothetical_protein	Cytoplasmic	180	20.4	4.11	53	72	9	High	0	54.035	269.19	4.37391e+07	1.72464e+07	3.23659e+07	2.42459e+07	3.59691e+07	4.07554e+07	3.0022e+07	5.49632e+07	3.74457e+07	3.3651e+07	4.23208e+07	3.63963e+07	31832242	39306320	34714632	36282856	36485232	37453716	39344664	30346466	36901964	42884784	37808340	34038804	1.04127	0.515973	0.627346	1.07635	0.505484	0.611902	0.76423	0.787866
SP_1282	SP_1282	15901142	ABC transporter ATP-binding protein	Cytoplasmic	519	59.5	7.31	14	18	6	High	0	18.357	34.78	6.66882e+06	3.30665e+06	5.23021e+06	3.96519e+06	5.45144e+06	5.80586e+06	5.64596e+06	8.33895e+06	5.93186e+06	4.61595e+06	6.43454e+06	4.57869e+06	5.02592e+06	6.9704e+06	5.56298e+06	5.70134e+06	5515426	5384512	7.21758e+06	4900543	5.85931e+06	5.71894e+06	5.81685e+06	4.31724e+06	0.945441	0.657561	0.742223	0.881829	0.454834	0.562423	0.773215	0.79508
SP_1283	SP_1283	15901143	heat shock protein HtpX	CytoplasmicMembrane	299	32.8	6.14	27	47	5	High	0	34.52	129.57	9.30829e+06	2.62346e+06	5.56513e+06	4.76839e+06	6.40552e+06	7.28784e+06	3.52816e+06	8.5619e+06	4.26479e+06	3.63465e+06	6.08881e+06	5.10936e+06	6973182	5453745	5.92612e+06	6.88022e+06	6487766	6.74864e+06	4476106	5.02545e+06	4210289	4478397	5.51119e+06	4.8148e+06	1.09609	0.26246	0.374575	1.07968	0.397576	0.505262	0.0033743	0.00642724
SP_1284	SP_1284	15901144	hypothetical protein	Unknown	186	20.6	5.71	77	321	18	High	0	122.117	1043.76	3.14119e+08	9.55941e+07	2.06563e+08	1.16429e+08	1.5795e+08	1.7773e+08	2.35084e+08	5.35593e+08	3.22357e+08	1.02379e+08	1.50417e+08	1.4892e+08	220744656	237873264	223435216	180533360	160311488	162229824	318354208	274107872	317186816	131814352	132991576	138580368	0.737589	0.00232605	0.0142746	0.443453	9.59839e-05	0.00271901	8.08151e-07	8.53249e-06
SP_1285	gidB	15901145	16S rRNA methyltransferase GidB	Cytoplasmic	237	27.2	7.46	57	85	10	High	0	46.103	242.1	3.29245e+07	9.62522e+06	2.16979e+07	2.03819e+07	2.99114e+07	3.18058e+07	1.69313e+07	3.78241e+07	1.97616e+07	2.69433e+07	3.19559e+07	3.5156e+07	24088048	21382762	23212998	30461368	30298656	29227470	21964632	21118922	19545858	34124348	28653120	32920870	1.31017	0.00194296	0.0128696	1.52801	0.00263108	0.0140284	9.32341e-05	0.00031966
SP_1286	SP_1286	15901146	uracil permease	CytoplasmicMembrane	427	44.8	9.13	10	3	2	High	0.003	7.076	9.75	354367	107694	253105	345206	444058	436999	298421	777151	410488	554601	742726	1.28448e+06	281228	191919	265876	467447	448465	410145	363442	494185	405946	667066	681487	1.21251e+06	1.79434	0.00886414	0.0345672	2.02684	0.0351527	0.0811666	0.000974278	0.00226138
SP_1287	ffh	15901147	signal recognition particle protein	CytoplasmicMembrane	523	57.7	8.07	76	421	35	High	0	247.403	1424.96	4.1187e+08	1.29941e+08	2.66017e+08	2.1216e+08	2.85704e+08	3.11139e+08	2.14412e+08	4.16934e+08	2.48329e+08	1.95071e+08	2.921e+08	2.77921e+08	288225888	328437536	287406176	334712960	290316384	282675520	289478624	215044864	244342256	254278528	257789584	257938512	1.00402	0.965125	0.976857	1.02823	0.70346	0.780633	0.0675937	0.0867513
SP_1288	SP_1288	15901148	DNA-binding protein	Cytoplasmic	110	13.3	4.48	36	23	5	High	0	18.467	44.1	6.94257e+06	1.85012e+06	4.14715e+06	3.52715e+06	5.3279e+06	5.61639e+06	3.38681e+06	8.26268e+06	4.37279e+06	4.45132e+06	5.17698e+06	8.90213e+06	5.22563e+06	3.78502e+06	4.41016e+06	5055276	5393908	5209270	4295849	4.8551e+06	4.31892e+06	5.50562e+06	4692532	8367955	1.16673	0.162315	0.269216	1.37834	0.174601	0.265639	0.188246	0.216583
SP_1289	SP_1289	15901149	hypothetical protein	Cytoplasmic	121	14.5	4.87	21	19	2	High	0	15.569	48.09	3.54646e+06	818494	2.14741e+06	1.0688e+06	1.78822e+06	1.6556e+06	2.44074e+06	8.50446e+06	3.232e+06	2.2672e+06	2.83278e+06	4.20657e+06	2.70552e+06	1.60719e+06	2.27879e+06	1.48938e+06	1.80994e+06	1.54787e+06	3076022	4.9914e+06	3.19299e+06	2.78232e+06	2.57361e+06	3.96975e+06	0.73537	0.15438	0.258846	0.828183	0.425322	0.534532	0.00937641	0.0156491
SP_1290	SP_1290	15901150	hypothetical protein	Cytoplasmic	434	50.8	5.72	30	77	10	High	0	50.442	229.25	1.89578e+07	7.45707e+06	1.19647e+07	1.33485e+07	1.98052e+07	2.00725e+07	1.3197e+07	3.17825e+07	1.44636e+07	1.77391e+07	2.18582e+07	2.51799e+07	14049295	16355940	12806374	19658268	20057646	18515408	17089222	17869480	14317293	22323316	19657080	23598674	1.34759	0.0158036	0.0517104	1.33085	0.0294447	0.0713609	0.00391714	0.00727642
SP_1291	SP_1291	15901151	Cof family protein	Cytoplasmic	268	29.7	4.98	64	248	19	High	0	135.579	789.87	1.35504e+08	3.99798e+07	9.70342e+07	6.76909e+07	9.25586e+07	1.11234e+08	7.32994e+07	1.43115e+08	9.37585e+07	7.5976e+07	1.02689e+08	9.65126e+07	97060904	95318248	104385352	104020152	93916336	101399272	97494328	76425168	92485472	97813408	91540576	89901776	1.00866	0.847895	0.897138	1.04824	0.54429	0.649494	0.256347	0.287492
SP_1292	SP_1292	15901152	SAP domain-containing protein	Cytoplasmic	332	38.8	5.69	11	19	4	High	0	11.423	30.51	2.18511e+06	199746	1.43261e+06	353595	1.8645e+06	2.24917e+06	179296	454984	183309	1.20168e+06	1.94159e+06	1.96111e+06	1.68363e+06	366436	1.51319e+06	479936	1880779	2.0949e+06	216563	294601	181303	1.45785e+06	1768501	1.8536e+06	1.25043	0.747825	0.816543	7.33602	0.000230369	0.00403317	0.0158148	0.0246785
SP_1296	SP_1296	15901156	hypothetical protein	Cytoplasmic	88	10.5	5.6	84	134	13	High	0	75.193	392.31	1.03e+08	3.43267e+07	7.77038e+07	4.26529e+07	6.16009e+07	6.71945e+07	7.65149e+07	1.46085e+08	9.05699e+07	3.82304e+07	5.37037e+07	4.66967e+07	73878224	81114256	83541848	64891480	62456072	61538432	101818752	77974488	89332552	48696112	47924568	43628764	0.791861	0.00449069	0.0220503	0.52113	0.00155029	0.0101592	4.71942e-05	0.000188777
SP_1297	fld	15901157	flavodoxin	Cytoplasmic	147	16	3.97	41	57	7	High	0	49.564	213.15	9.01364e+07	2.83612e+07	6.30229e+07	4.26167e+07	5.40412e+07	6.81651e+07	4.19481e+07	5.8611e+07	5.21412e+07	4.159e+07	4.91759e+07	4.80863e+07	64781352	66535856	67680032	64736132	54744848	62449628	55241228	32264446	51393016	53093096	43933284	44931428	0.914237	0.154509	0.258846	1.02202	0.814112	0.869721	0.0497254	0.0664192
SP_1298	SP_1298	15901158	DHH subfamily 1 protein	Cytoplasmic	311	35	5.77	41	141	11	High	0	66.64	416.6	7.02022e+07	2.27773e+07	4.40217e+07	3.28176e+07	4.74338e+07	5.04569e+07	2.8756e+07	7.12183e+07	3.59361e+07	3.0579e+07	3.957e+07	3.75337e+07	50700956	52837280	47200944	49534324	48049016	46309940	37746580	38947996	35423004	38887700	35409940	35063372	0.954584	0.297685	0.407395	0.975414	0.590818	0.690269	7.33426e-05	0.000265895
SP_1299	rpmE2	15901159	5S ribosomal protein L31	Cytoplasmic	80	9.4	9	86	344	8	High	0	107.506	1295.8	5.13818e+08	1.58077e+08	3.3183e+08	2.97138e+08	4.93231e+08	5.34362e+08	3.82223e+08	9.69805e+08	4.4152e+08	3.6759e+08	5.80485e+08	5.70862e+08	358153760	403058112	359036480	472695552	500652416	484085664	521470624	486329536	435286176	484124992	509806176	528326368	1.30099	0.00336533	0.0183406	1.05486	0.395581	0.503272	0.0012181	0.00271694
SP_1306	gdhA	15901165	glutamate dehydrogenase (EC:1.4.1.4)	Cytoplasmic	448	48.8	5.47	69	714	33	High	0	217.335	2395.43	1.62229e+09	5.15537e+08	1.0823e+09	8.50623e+08	1.27784e+09	1.4561e+09	7.52809e+08	1.80433e+09	9.48602e+08	8.54666e+08	1.24676e+09	1.28868e+09	1105709568	1395913088	1173452800	1388816512	1300818816	1317046912	1038968832	884046336	934038080	1138063872	1093342848	1189849088	1.09023	0.279334	0.390531	1.19748	0.027	0.067673	0.00416548	0.00763142
SP_1317	atpA	15901171	V-type ATP synthase subunit A (EC:3.6.3.14)	Cytoplasmic	591	65.2	5.14	3	1	1	High	0.008	3.861	2.26	1.58483e+06	584582	981035	462630	935867	926331	780664	1.98368e+06	975513	686725	729651	792659	1.22183e+06	1.13044e+06	1.03652e+06	631738	945954	865915	967073	1.22062e+06	965704	828173	669638	752571	0.721086	0.0612468	0.129494	0.713637	0.027857	0.069083	0.0204003	0.0309816
SP_1325	SP_1325	15901179	Gfo/Idh/MocA family oxidoreductase	Cytoplasmic	369	40.8	5.16	14	18	4	High	0	18.463	49.53	1.15151e+07	2.72184e+06	7.20377e+06	2.46725e+06	5.76476e+06	6.19132e+06	118384	74322.9	125896	26293.8	47888.8	106003	8580775	5672427	7668195	3.50731e+06	5.8294e+06	5.73491e+06	141828	51105.8	124867	30298.1	44711.1	101379	0.68753	0.136396	0.239131	0.555027	0.260013	0.364272	1.23386e-06	1.16616e-05
SP_1329	SP_1329	15901183	N-acetylneuraminate lyase	Cytoplasmic	305	33.5	5.14	12	11	3	High	0	11.426	34.9	3.99779e+06	1.50617e+06	3.19108e+06	2.53607e+06	2.44867e+06	1305267	91764	141424	43279	51779.6		38190.4	3.04193e+06	3.05843e+06	3.38642e+06	3609111	2.47789e+06	1222924	109902	94933.1	42946	60239.8	na	36678.5	0.770538	0.331098	0.443706	0.586717	0.329645	0.441409	1.24174e-05	6.59333e-05
SP_1341	SP_1341	15901195	ABC transporter ATP-binding protein	CytoplasmicMembrane	246	27.1	8.85	27	47	5	High	0	33.117	145.1	9.12915e+06	3.20441e+06	5.82208e+06	2.60691e+06	4.20544e+06	4.87596e+06	3.32231e+06	1.11571e+07	4.00519e+06	2.97761e+06	3.476e+06	3.66609e+06	6840754	6.72746e+06	6193191	3710971	4.2597e+06	4526467	4205766	6.51664e+06	3963390	3.66641e+06	3.16054e+06	3.4624e+06	0.632401	0.00225656	0.0139215	0.700632	0.110793	0.185657	0.00465134	0.00838079
SP_1343	SP_1343	15901197	prolyl oligopeptidase	CytoplasmicMembrane	646	74.7	5.85	3	2	2	High	0.002	5.402	2.43	138715	90612.6			132464	147681	69915.3	573240			200444	162638	112301	159601	na	na	133203	139642	83325.4	368160	na	na	184987	155636	1.00347	0.926243	0.949867	0.75445	0.970012	0.978353	0.933886	0.942526
SP_1344	SP_1344	15901198	hypothetical protein	Cytoplasmic	832	95.8	6.4	4	9	3	High	0	10.683	20.82	1.6154e+06	465341	1.02831e+06	529838	896308	892030	366846	1.48908e+06	797265	125361	611486	345818	1.2522e+06	888380	1088499	725488	905500	834275	449064	927300	788716	147158	561116	329411	0.763456	0.0902069	0.176183	0.479283	0.136651	0.217198	0.0231132	0.034369
SP_1355	rplJ	15901209	5S ribosomal protein L1	Cytoplasmic	166	17.5	5.12	80	449	19	High	0	149.976	1731.01	1.08385e+09	3.19428e+08	7.66127e+08	6.34381e+08	9.48468e+08	1.026e+09	8.02533e+08	1.50213e+09	1.01524e+09	7.80491e+08	1.13386e+09	1.09962e+09	742540096	842634368	831143168	1027450048	963198976	930733504	1109080064	741199360	1003863488	1036908416	989021824	1015224832	1.20902	0.018243	0.0570278	1.06552	0.559812	0.664919	0.147623	0.174702
SP_1356	SP_1356	255964978	chlorohydrolase	Cytoplasmic	518	57.9	5.26	36	196	16	High	0	97.283	581.46	6.9568e+08	3.24921e+08	4.73431e+08	3.09663e+08	4.00319e+08	4.03228e+08	4.48105e+08	9.15729e+08	5.62584e+08	4.34406e+08	4.58741e+08	4.55747e+08	482330624	859277696	512240128	493888896	406143744	365833088	613103424	460135424	554345024	572263488	404055936	422288640	0.682831	0.156507	0.260855	0.859316	0.318699	0.428218	0.252241	0.283949
SP_1357	SP_1357	15901211	ABC transporter ATP-binding protein/permease	CytoplasmicMembrane	583	64.8	7.37	13	24	5	High	0	23.722	55.43	2.62893e+06	996080	1.90694e+06	1.03128e+06	579331	1.1136e+06	2.46664e+06	5.55251e+06	3.52918e+06	2.23065e+06	2.66373e+06	2.65749e+06	2015230	1.97613e+06	2.02346e+06	1.4324e+06	584941	1.03706e+06	3.11445e+06	3.30577e+06	3.48931e+06	2732617	2.41997e+06	2.51265e+06	0.507813	0.0471567	0.10656	0.773522	0.00615889	0.0248995	0.000943199	0.00219349
SP_1358	SP_1358	15901212	ABC transporter ATP-binding protein/permease	CytoplasmicMembrane	574	64.3	7.55	16	21	7	High	0	31.842	63.96	1.74369e+06	322086	1.56235e+06	313937	2.01231e+06	1.82609e+06	2.53873e+06	7.78163e+06	3.69587e+06	2.60652e+06	4.23298e+06	4.25343e+06	1.34323e+06	604067	1.65133e+06	424491	2.03257e+06	1.70558e+06	3.20413e+06	4.58211e+06	3.65722e+06	3205270	3.8369e+06	4.00732e+06	1.15673	0.959798	0.976548	0.965573	0.830158	0.879653	0.0250232	0.0370257
SP_1359	msrAB1	15901213	bifunctional methionine sulfoxide reductase A/B	Cytoplasmic	312	35.7	5.03	56	347	17	High	0	131.199	1132.49	3.32898e+08	1.11154e+08	2.43867e+08	1.31845e+08	1.80202e+08	1.93488e+08	1.86549e+08	4.30449e+08	2.40315e+08	1.31951e+08	1.84753e+08	1.69401e+08	233853664	278245088	263546032	206068032	182652368	175831312	252418704	221521600	236465536	171195696	163803456	157104960	0.727848	0.0106331	0.039111	0.692708	0.00125123	0.00900423	0.000207777	0.000602252
SP_1360	SP_1360	15901214	homoserine kinase (EC:2.7.1.39)	Cytoplasmic	289	31.5	6.24	57	117	12	High	0	73.144	429.65	5.36636e+07	1.24802e+07	3.62493e+07	2.20376e+07	3.49654e+07	4.04595e+07	2.10843e+07	6.06511e+07	2.90957e+07	2.72062e+07	3.79065e+07	3.6801e+07	38971564	28116932	38803212	32909596	35470876	37179776	27519408	33381560	28718064	34510328	33899316	34411384	0.99687	0.954929	0.97362	1.14731	0.0748091	0.140402	0.287599	0.318669
SP_1361	hom	15901215	homoserine dehydrogenase (EC:1.1.1.3)	Cytoplasmic	428	46.1	5.17	67	527	26	High	0	204.562	1821.16	4.80389e+08	1.749e+08	3.34209e+08	1.759e+08	2.57441e+08	2.78001e+08	2.52142e+08	5.88003e+08	3.10404e+08	2.25269e+08	3.14638e+08	2.9616e+08	334873952	448695584	361206432	276646432	260858336	252819776	341760544	299772224	305374496	293982080	277960512	274572960	0.690375	0.0165603	0.0529021	0.893979	0.0737937	0.138718	0.00503079	0.0089702
SP_1362	mecA	15901216	adaptor protein	Cytoplasmic	245	28.4	4.4	39	76	8	High	0	44.309	258.01	2.46579e+07	1.05122e+07	1.93521e+07	1.6029e+07	1.95739e+07	2.3021e+07	1.80413e+07	3.89296e+07	2.41498e+07	2.23813e+07	3.38639e+07	3.04464e+07	18177968	23414784	20743414	23753372	19854904	21172856	23417534	21712722	23787040	28343602	30343234	28447702	1.03922	0.672028	0.755626	1.26433	0.0028015	0.014413	0.00464381	0.00838079
SP_1363	SP_1363	15901217	conserved_domain_protein	Unknown	344	38.7	8.56	56	489	22	High	0	166.491	1538.15	4.0622e+08	1.39771e+08	2.86001e+08	2.11712e+08	2.77716e+08	3.00851e+08	2.05137e+08	4.76424e+08	2.65332e+08	2.14883e+08	2.77769e+08	2.78637e+08	284103072	355004480	309104704	334712960	282190528	273629184	277117632	244389472	261077824	280738688	245507744	258862272	0.93917	0.526672	0.638357	1.00322	0.957681	0.973204	0.0835119	0.104608
SP_1364	SP_1364	15901218	integral membrane protein	CytoplasmicMembrane	477	54.8	9.58	8	16	4	High	0	11.429	24.28	3.99256e+06	827214	2.39881e+06	2.29499e+06	2.73069e+06	3.37322e+06	2.4655e+06	6.07787e+06	3.4049e+06	3.33909e+06	4.63258e+06	4870705	3034460	1.62576e+06	2.54488e+06	3.24586e+06	2.76131e+06	3.13152e+06	3.11445e+06	3.61045e+06	3360906	4.11585e+06	4197301	4589512	1.26836	0.235277	0.34871	1.27929	0.0104036	0.0347674	0.0155593	0.0243431
SP_1365	SP_1365	15901219	glycosyl transferase family protein	CytoplasmicMembrane	328	38.1	6.46	26	10	7	High	0	31.021	28.06	5.68168e+06	1.2691e+06	3.43131e+06	2.53845e+06	5.85305e+06	3.75395e+06	3.4174e+06	8.20439e+06	4.74806e+06	2.72283e+06	5.84724e+06	5.9518e+06	4292346	2550326	3.64225e+06	3609111	5920572	3.48281e+06	4334467	4820998	4.69418e+06	3.34228e+06	5.29536e+06	5602995	1.24107	0.417039	0.531439	1.02823	0.983681	0.988802	0.439438	0.468734
SP_1366	SP_1366	15901220	group 1 glycosyl transferase	Cytoplasmic	366	42.4	6.11	27	58	10	High	0	47.719	172.11	1.24446e+07	4.50015e+06	8.72907e+06	6.43601e+06	8.64223e+06	1.04879e+07	6.1067e+06	1.6168e+07	8.39332e+06	8.2503e+06	1.20788e+07	1.19083e+07	9239757	9621874	9304821	9355694	8746830	9702958	7.81484e+06	9310483	8287775	10295064	10902022	11176087	0.987184	0.69897	0.779903	1.27388	0.0127459	0.039869	0.00532141	0.00946029
SP_1367	licD3	15901221	licD3 protein	Cytoplasmic	278	32.3	6.33	22	62	6	High	0	21.489	140.03	9.77136e+06	3.398e+06	8.49519e+06	3.73435e+06	4.85298e+06	4.81642e+06	5.30136e+06	1.58278e+07	7.43122e+06	6.11407e+06	8.37611e+06	7.40951e+06	7311356	7169467	9058734	5348722	4907796	4471086	6763672	9088182	7.34016e+06	7592802	7568083	6971934	0.625653	0.00690139	0.0297691	0.954329	0.69007	0.769441	0.00268706	0.00524304
SP_1368	spr,psr	15901222	psr protein	CytoplasmicMembrane	424	47.7	6.84	53	197	21	High	0	97.929	560.23	9.23567e+07	3.86391e+07	6.34321e+07	3.94817e+07	7.06952e+07	6.12453e+07	5.1306e+07	1.07916e+08	6.90103e+07	3.39657e+07	5.06861e+07	4.52824e+07	66405144	91819912	68111432	59917284	71690104	56069460	67850120	58262864	68049088	43271872	45263972	42325692	0.829194	0.22694	0.338811	0.673981	0.00203404	0.0120502	0.00345377	0.00655779
SP_1369	SP_1369	15901223	prephenate dehydratase (EC:4.2.1.51)	Cytoplasmic	282	31.6	5.35	45	66	9	High	0	44.896	194.36	2.09538e+07	5.41424e+06	1.4958e+07	7.95478e+06	1.02671e+07	1.44288e+07	1.57006e+07	4.01362e+07	2.02341e+07	1.1832e+07	1.74861e+07	1.86935e+07	15500213	11673783	16022262	11607451	10428786	13286401	20381362	22359816	19940412	14798478	15730258	17531910	0.817724	0.184118	0.292084	0.766743	0.01175	0.0373517	0.00221737	0.00449468
SP_1370	SP_1370	15901224	shikimate kinase	Unknown	158	17.8	4.75	39	37	6	High	0	26.843	114.31	5.67064e+06	1.96551e+06	4.36907e+06	2.88608e+06	3.72307e+06	3.80925e+06	6.91728e+06	1.57275e+07	9.26908e+06	6.74864e+06	1.04302e+07	9.10807e+06	4.28492e+06	4043120	4644906	4.11907e+06	3763559	3538258	8868219	9032564	9156360	8399750	9379412	8564642	0.880362	0.0991675	0.188937	0.973636	0.474303	0.577734	1.271e-07	2.21044e-06
SP_1371	SP_1371	15901225	3-phosphoshikimate 1-carboxyvinyltransferase (EC:2.5.1.19)	Cytoplasmic	427	45.7	6.18	63	181	24	High	0	127.666	600.95	1.91162e+08	6.33168e+07	1.28459e+08	6.93576e+07	9.92992e+07	1.07662e+08	8.86812e+07	1.73058e+08	1.10454e+08	6.01837e+07	8.18314e+07	8.20176e+07	135482624	154315248	137898256	106695192	100716888	98672128	118332200	91872856	108445272	77227688	72806272	76441368	0.715658	0.00208498	0.0134232	0.710733	0.0116791	0.0372273	7.1021e-05	0.000259043
SP_1372	SP_1372	15901226	conserved_hypothetical_protein	Cytoplasmic	112	12.4	4.88	60	159	6	High	0	48.194	554.98	3.10967e+08	1.18572e+08	2.31708e+08	1.2614e+08	1.61074e+08	1.7302e+08	1.88835e+08	3.51049e+08	2.52407e+08	1.42411e+08	1.62235e+08	1.56146e+08	218672976	299331488	250533984	196483632	163357664	157694960	255161168	182052112	248279760	184352416	143559840	145064768	0.673403	0.0260975	0.0726244	0.689981	0.0539	0.111115	0.0148037	0.0233129
SP_1373	SP_1373	15901227	prephenate dehydrogenase (EC:1.3.1.12)	Cytoplasmic	367	41	5.11	40	112	13	High	0	63.588	325.34	3.83966e+07	1.24356e+07	2.48869e+07	1.13619e+07	1.8354e+07	1.9285e+07	1.59847e+07	4.06922e+07	2.10107e+07	1.20546e+07	1.72699e+07	1.60602e+07	28036782	27880900	26650826	16788148	18638338	17782032	20777034	22683150	20729526	15180009	15551609	15103020	0.644417	0.000210989	0.00393717	0.71405	0.00041073	0.00533426	5.27995e-07	6.2117e-06
SP_1374	aroC	15901228	chorismate synthase (EC:4.2.3.5)	Cytoplasmic	388	42.8	6.24	65	264	24	High	0	162.796	962.28	1.79283e+08	5.58326e+07	1.20653e+08	5.33735e+07	7.78328e+07	8.65255e+07	9.79484e+07	2.32433e+08	1.28052e+08	6.64298e+07	8.39159e+07	8.83643e+07	127118832	135182784	130327200	81585952	78895336	79114888	130808880	122005128	126176328	85297696	74663504	82383392	0.610236	1.88383e-05	0.00179235	0.639448	0.000553799	0.00596028	5.08426e-07	6.04071e-06
SP_1375	aroB	15901229	3-dehydroquinate synthase (EC:4.2.3.4)	Cytoplasmic	355	38.9	5.54	57	113	15	High	0	82.612	440.65	1.26326e+08	3.97098e+07	8.24388e+07	3.8978e+07	4.99248e+07	5.43594e+07	6.47278e+07	1.58206e+08	8.45204e+07	4.06586e+07	5.95833e+07	5.52166e+07	90047976	94568112	88615808	59140816	50585300	49868236	85886640	84161168	83322368	51928748	53154572	51536372	0.584099	0.000739656	0.00737127	0.618146	3.07464e-06	0.000515222	1.12716e-06	1.12716e-05
SP_1376	aroE	15901230	shikimate 5-dehydrogenase (EC:1.1.1.25)	Cytoplasmic	284	31.3	5.11	17	9	3	High	0	13.199	20.42	4.12395e+06	1.10571e+06	2.20355e+06	2.45783e+06	3.91073e+06	6.2838e+06	2.65718e+06	9.55875e+06	3.18393e+06	3.29338e+06	4.86889e+06	4.47101e+06	3131520	2214185	2.332e+06	3492770	3955947	5817874	3.35794e+06	5.59188e+06	3.14359e+06	4053383	4.41345e+06	4.21394e+06	1.72794	0.0465109	0.105756	1.04857	0.680022	0.761131	0.063911	0.0827327
SP_1378	SP_1378	15901232	hypothetical protein	Unknown	387	43.8	8.43	10	31	4	High	0	14.055	70.74	6.93498e+06	2.51746e+06	4.98057e+06	3.5551e+06	4.80018e+06	5.06409e+06	2.27505e+06	6.39181e+06	3.08001e+06	4.14739e+06	5.62234e+06	5.44725e+06	5.21823e+06	5235468	5296035	5.09928e+06	4857164	4692604	2.87125e+06	3788247	3.04482e+06	5129487	5088471	5.13388e+06	0.930114	0.0408467	0.0975743	1.58196	0.00525091	0.0223975	0.000140712	0.000436315
SP_1381	SP_1381	15901235	ABC transporter ATP-binding protein	CytoplasmicMembrane	249	27.7	5.26	4	4	1	High	0.007	4.06	9.34	1.22277e+06	499708	958935	471496	600935	665543	60251.1	121545	69775.9	42900	95611.5	77115.6	947845	958692	1.01318e+06	642916	607186	623789	71714.4	82538.4	69203.9	49759.1	88842.2	73829.2	0.641806	7.36209e-05	0.00268256	0.950657	0.694298	0.772687	3.81847e-08	9.74928e-07
SP_1382	SP_1382	15901236	alpha-amylase (EC:3.2.1.1)	Extracellular	484	55.9	4.82	9	5	3	High	0	12.352	15.21	344729	40352.9	209670	140090	152836	350929	382780	777220	499396	519718	682060	662272	274206	68373.9	220523	185657	154412	329783	468958	494185	493991	624431	625879	628687	1.18957	0.602326	0.698828	1.28952	0.000130315	0.00307696	0.012018	0.0193839
SP_1384	SP_1384	15901238	hypothetical protein	Cytoplasmic	161	18.8	5.29	42	47	5	High	0	20.84	77.93	2.30227e+07	8.81059e+06	18347182	1.15152e+07	1.38845e+07	1.60939e+07	1.37702e+07	2.01025e+07	1.86576e+07	1.29891e+07	1.89934e+07	1.4376e+07	16948610	19475808	19562646	16938954	14077042	14846846	17878526	11469049	18460784	16325403	17069570	13514078	0.819169	0.0504944	0.113007	0.981189	0.992403	0.995799	0.429055	0.459291
SP_1386	SP_1386	15901240	spermidine/putrescine ABC transporter spermidine/putrescine-binding protein	Unknown	356	41	4.81	10	18	3	High	0	12.237	41.99	2.25914e+06	788820	1.5155e+06	1.4603e+06	2.04836e+06	2.0751e+06	585920	3.10763e+06	696420	1.87124e+06	2.53964e+06	2.09159e+06	1.73645e+06	1.54744e+06	1.60882e+06	2.04734e+06	2073055	1.93736e+06	722339	1.88856e+06	688837	2.28588e+06	2.31148e+06	1976056	1.23812	0.00571266	0.0263279	1.9921	0.0731931	0.138477	0.036465	0.051179
SP_1388	SP_1388	15901242	spermidine/putrescine ABC transporter permease	CytoplasmicMembrane	268	30.6	9.28	4	1	1	High	0.008	3.71	2.2	576194	169246	374943	219556				239393	184525	246533	217202	453384	453598	307062	394704	294905	na	na	na	158107	183283	293550	200607	430834	0.765745	na	na	1.80633	0.156468	0.242774	0.0614141	0.0801926
SP_1389	SP_1389	15901243	spermidine/putrescine ABC transporter ATP-binding protein	CytoplasmicMembrane	385	44.1	4.74	25	38	8	High	0	32.363	98.75	6.00935e+06	1.67836e+06	3888057	2913179	4.00573e+06	5.11233e+06	1.8794e+06	4.6703e+06	2.52314e+06	2.53398e+06	5.46759e+06	4.44103e+06	4537105	3.42081e+06	4.13279e+06	4148256	4.05719e+06	4738741	2360339	2.79768e+06	2.4916e+06	3.10568e+06	4.95352e+06	4185768	1.07059	0.492322	0.602991	1.60073	0.0352633	0.0811666	0.00969683	0.0160943
SP_1392	SP_1392	15901246	alpha-acetolactate decarboxylase	Cytoplasmic	243	27.3	5.06	21	53	5	High	0	25.553	163.87	9.82527e+06	3.23388e+06	6.8178e+06	4.17369e+06	8.08857e+06	7.46399e+06	7.85299e+06	2.0214e+07	1.15723e+07	6.62801e+06	9.93576e+06	9.90559e+06	7.35545e+06	6.79369e+06	7.26191e+06	5995585	8189621	6.90524e+06	10080052	11524223	11455809	8.24838e+06	8967148	9313724	0.985026	0.820529	0.874531	0.802456	0.0177955	0.0495824	0.00113503	0.00256293
SP_1393	SP_1393	15901247	hypothetical protein	Cytoplasmic	423	49.3	6.21	24	64	7	High	0	40.453	148.96	2.32326e+07	6.72482e+06	1.44154e+07	9.71905e+06	1.38011e+07	1.58948e+07	1.12215e+07	2.8535e+07	1.60634e+07	8.59069e+06	1.68662e+07	1.62449e+07	17093332	14657341	15378871	14259889	13975677	14663281	14462457	16073748	15895874	10725380	15194299	15196418	0.910233	0.124308	0.225067	0.885511	0.331633	0.442554	0.391994	0.424926
SP_1394	SP_1394	15901248	amino acid ABC transporter amino acid-binding protein	Unknown	271	29.3	4.98	71	323	23	High	0	184.585	1135.87	1.50625e+08	4.56746e+07	1.00777e+08	9.54717e+07	1.29689e+08	1.43468e+08	2.06558e+08	4.85822e+08	2.67497e+08	1.18148e+08	1.5842e+08	1.75569e+08	107563248	109623016	108707296	147942048	131882392	130470080	279864032	249350672	263045904	152800224	140037712	163587056	1.25898	0.00488296	0.0233342	0.576105	0.000592627	0.00597765	5.7074e-07	6.52529e-06
SP_1395	SP_1395	15901249	phosphate transport system regulatory protein PhoU	Cytoplasmic	217	25	4.81	69	308	20	High	0	160.11	1050.89	3.31266e+08	9.7973e+07	2.25159e+08	1.66207e+08	2.57316e+08	2.91908e+08	1.61397e+08	3.98908e+08	2.20565e+08	1.52283e+08	2.18737e+08	2.3233e+08	232474816	244144352	242944784	260564640	260858336	265487248	216811088	206065312	217759168	197521440	193699056	215408304	1.09359	0.00581835	0.0265222	0.946917	0.210698	0.30855	7.3747e-05	0.00026652
SP_1396	SP_1396	15901250	phosphate transporter ATP-binding protein	CytoplasmicMembrane	252	27.9	5.53	80	332	23	High	0	158.175	1204.94	3.66223e+08	1.21377e+08	2.58727e+08	1.54739e+08	2.20067e+08	2.37452e+08	1.81264e+08	3.92479e+08	2.34451e+08	1.47974e+08	1.96341e+08	1.87132e+08	256591152	304612992	279813024	242901040	223275808	215700832	244195280	202569856	230558192	192251504	173478784	173770064	0.810777	0.0265294	0.0733015	0.796518	0.0253884	0.0653084	0.000861246	0.002035
SP_1397	SP_1397	15901251	phosphate transporter ATP-binding protein	CytoplasmicMembrane	267	30.3	7.2	81	291	22	High	0	124.43	882.79	2.25995e+08	7.31911e+07	1.59429e+08	1.37992e+08	2.09181e+08	2.20017e+08	1.23615e+08	270991493	1.6428e+08	1.29411e+08	1.99324e+08	1.96496e+08	159823616	179740640	171443616	215662464	212103392	200301584	166299888	141777568	161632080	167251344	176116496	182100896	1.22908	0.00712307	0.0304231	1.11871	0.10705	0.180936	0.00197691	0.00409495
SP_1398	SP_1398	15901252	phosphate ABC transporter permease	CytoplasmicMembrane	294	31.6	9.44	10	30	3	High	0	14.281	80.54	1.51962e+07	3.0348e+06	1.08115e+07	8.51301e+06	1.34236e+07	14891144	7170418	1.70108e+07	1.16532e+07	8.66916e+06	1.30251e+07	1.30039e+07	11284718	6.35284e+06	11520921	12445263	13570282	13745430	9193754	9754551	11554491	10826634	11707554	12205042	1.36362	0.156143	0.260835	1.13889	0.157634	0.24426	0.185304	0.213607
SP_1399	SP_1399	15901253	phosphate ABC transporter permease	CytoplasmicMembrane	305	32.7	10.29	14	56	6	High	0	21.966	97.52	2.00927e+07	6.97864e+06	1.17421e+07	9.816e+06	1.45966e+07	1.57135e+07	1.06699e+07	1.93008e+07	1.40848e+07	1.07358e+07	1.56844e+07	1.73039e+07	14847612	15253119	12484980	14410087	14786540	14479744	13806870	11027526	13922640	13400734	14122060	16224176	1.02561	0.669499	0.75351	1.12875	0.264779	0.369306	0.417115	0.448913
SP_1400	pstS1	15901254	phosphate ABC transporter substrate-binding protein	CytoplasmicMembrane	292	31.2	4.89	53	171	15	High	0	94.431	678.05	1.06939e+08	2.98299e+07	6.69212e+07	5.31503e+07	7.9147e+07	8.28541e+07	4.36067e+07	1.12189e+08	6.12228e+07	5.05214e+07	6.64483e+07	7.17125e+07	76694576	69982784	71887000	81272936	80214784	75837792	57518568	60347420	60362068	64625984	59178424	66874000	1.08584	0.0746461	0.15243	1.06986	0.170187	0.259934	0.000227878	0.000654195
SP_1402	SP_1402	15901256	NOL1/NOP2/sun family protein	Cytoplasmic	434	48.1	5.43	33	68	11	High	0	59.176	224.77	2.59057e+07	7.26875e+06	1.80502e+07	1.21052e+07	2.03114e+07	2.1862e+07	7.4528e+06	1.63138e+07	9.80698e+06	1.00266e+07	1.30148e+07	1.33923e+07	19044828	15918981	19348012	17844306	20564514	20165094	9558539	9366044	9689310	12512248	11707554	12579082	1.07847	0.369839	0.483444	1.28605	0.000561936	0.00597765	4.63673e-06	3.19775e-05
SP_1403	SP_1403	15901257	inositol monophosphatase	Unknown	257	28.8	4.79	9	10	2	High	0.003	7.192	30.19	2358013	662157	1.55019e+06	1.31567e+06	1.68713e+06	1.66461e+06	1.02968e+06	2.44218e+06	1237159	1.43681e+06	1.69478e+06	1.70387e+06	1.81187e+06	1.2871e+06	1.64071e+06	1.84658e+06	1.70875e+06	1.54787e+06	1.28097e+06	1.49375e+06	1.22669e+06	1.75386e+06	1.54196e+06	1.6086e+06	1.0767	0.513741	0.625283	1.22567	0.0438293	0.0953837	0.126805	0.152471
SP_1404	SP_1404	15901258	hypothetical protein	Unknown	92	10.3	8.28	16	3	2	High	0.002	8.117	9.69	3.81083e+06	1.07297e+06	2.38829e+06	1.79166e+06	2.3434e+06	2.65213e+06	1.85127e+06	5.21682e+06	2.64388e+06	2.28226e+06	2.93506e+06	2.80672e+06	2899978	2.13051e+06	2.53424e+06	2.52231e+06	2.36656e+06	2465361	2.32209e+06	3.11557e+06	2.61015e+06	2.79475e+06	2672992	2.65378e+06	0.972174	0.831759	0.883271	1.00916	0.861188	0.906799	0.645324	0.671629
SP_1405	spxA	15901259	transcriptional regulator spx	Cytoplasmic	133	15.4	9.36	32	15	3	High	0	15.253	43.41	5.35599e+06	1.0208e+06	3.37284e+06	2.17536e+06	3.73153e+06	3.78561e+06	2.60104e+06	6.47415e+06	2.84441e+06	2.83862e+06	3.35029e+06	3.26178e+06	4.05475e+06	2026139	3.57828e+06	3.08633e+06	3773680	3.51978e+06	3281009	3.83409e+06	2.80774e+06	3.49183e+06	3.04321e+06	3076998	1.0746	0.643029	0.730772	0.968679	0.810002	0.866119	0.928588	0.938758
SP_1407	SP_1407	15901261	HAD superfamily hydrolase	Cytoplasmic	257	28.2	4.89	62	155	14	High	0	88.601	580.34	9.78587e+07	2.43776e+07	5.89151e+07	2.98254e+07	4.53506e+07	4.37768e+07	4.77586e+07	1.11377e+08	5.65989e+07	2.92134e+07	3.7747e+07	4.28259e+07	70284560	56735732	63258496	44901048	46020112	40193784	63150792	59826504	55828408	37084416	33721576	39998668	0.689068	0.00765972	0.0314215	0.619693	0.00140593	0.00976006	0.000130537	0.000408185
SP_1408	SP_1408	15901262	acyl-ACP thioesterase	Cytoplasmic	245	28.5	5.39	16	29	3	High	0	14.699	74.73	6.8322e+06	2.07566e+06	4.1764e+06	2.35165e+06	3.07722e+06	3.35124e+06	3.68689e+06	8.07184e+06	5.1489e+06	2.45828e+06	3.32874e+06	3.93624e+06	5.14428e+06	4.2804e+06	4442153	3.33296e+06	3.11561e+06	3.11302e+06	4682259	4.7471e+06	5.08916e+06	3.01858e+06	3.02516e+06	3.71611e+06	0.689529	0.00365655	0.0192051	0.672234	0.00549724	0.0231121	0.000322258	0.000869009
SP_1409	SP_1409	15901263	coproporphyrinogen III oxidase	Cytoplasmic	376	42.7	5.43	23	47	6	High	0	34.769	152.25	1.00313e+07	4.52083e+06	7.16287e+06	5.67803e+06	6.57827e+06	7.21197e+06	4.04459e+06	1.09061e+07	5.82166e+06	8.2901e+06	8.65706e+06	8.66079e+06	7480341	9666761	7.62543e+06	8226977	6659966	6674937	5.1337e+06	6.34784e+06	5.75071e+06	10345646	7819319	8143175	0.870395	0.274611	0.38671	1.52668	0.0171598	0.0488556	0.0191904	0.0294241
SP_1410	SP_1410	15901264	conserved_hypothetical_protein	Unknown	129	14.3	4.37	29	68	6	High	0	34.109	216.2	6.22664e+07	1.25983e+07	3.47741e+07	1.86212e+07	30382969	33235653	4.90107e+07	1.18654e+08	6.5259e+07	3.41432e+07	5.246e+07	6.13622e+07	45091996	28352970	37296628	27712554	30805712	30507858	64761368	63989816	64402784	43401008	46860392	57301416	0.803909	0.220161	0.329959	0.763965	0.0290773	0.0709888	0.000688256	0.0016583
SP_1411	SP_1411	15901265	hypothetical protein	Unknown	127	13.7	8.94	59	101	5	High	0	48.301	395.47	1.46483e+08	4.36087e+07	9.86729e+07	7.25718e+07	1.0304e+08	1.16778e+08	7.46154e+07	1.65898e+08	9.28998e+07	5.93087e+07	9.37969e+07	8.87891e+07	104064704	104342040	106221800	111734984	104472720	106852752	99250608	88276992	91598592	76057264	83414080	82754816	1.0268	0.27734	0.389143	0.867802	0.0358768	0.0820341	0.000138323	0.00043002
SP_1412	SP_1412	15901266	prolipoprotein diacylglyceryl transferase	CytoplasmicMembrane	262	30.3	8.78	11	12	3	High	0	12.125	27.81	5.3201e+06	1.62989e+06	3.23213e+06	1.76955e+06	2.38274e+06	2.28501e+06	1.37674e+06	2.28704e+06	1.56227e+06	1.24593e+06	1.58005e+06	2.06402e+06	4.02504e+06	3.31403e+06	3.42905e+06	2493460	2407044	2.13196e+06	1.72417e+06	1.40489e+06	1.54299e+06	1519455	1.44222e+06	1947801	0.653082	0.00513581	0.0243024	1.05082	0.707912	0.783378	7.00338e-05	0.000257005
SP_1413	hprK	15901267	HPr kinase/phosphorylase	Cytoplasmic	311	34.7	5.39	70	199	21	High	0	109.331	591.17	7.50662e+07	2.34174e+07	5.39482e+07	3.75792e+07	5.61923e+07	6.15035e+07	4.99363e+07	131869502	7.00855e+07	5.46532e+07	8.03105e+07	7.66184e+07	54173816	54297740	57867848	56968064	56977068	56343028	65969776	70735048	69133160	70078664	71479856	71425960	1.02374	0.336728	0.449743	1.03472	0.184123	0.277248	4.75118e-06	3.23373e-05
SP_1414	rpsU	15901268	3S ribosomal protein S21	Cytoplasmic	58	7	11.3	57	124	8	High	0	51.184	302.07	1.81506e+08	5.67047e+07	1.24074e+08	1.51008e+08	2.0476e+08	2.17658e+08	1.57095e+08	3.27457e+08	1.96744e+08	1.75064e+08	2.88387e+08	2.33089e+08	129210440	137472560	133571656	236485264	208041760	198488880	211341856	170005152	194128704	227855904	254280752	216332672	1.60652	0.00103863	0.008882	1.21373	0.0692908	0.133025	0.000187642	0.000551889
SP_1415	SP_1415	15901269	glucosamine-6-phosphate isomerase	Cytoplasmic	233	25.5	4.67	55	126	11	High	0	72.555	356.94	3.80321e+07	1.21024e+07	2.86541e+07	2.21311e+07	29884248	3.34978e+07	3.95875e+07	8.53754e+07	4.86602e+07	3.57295e+07	5.15412e+07	4.36735e+07	27749944	27173312	30735372	33062758	30298656	30782146	52162408	46433100	48041736	45466296	45973496	40836428	1.09906	0.110435	0.204718	0.902064	0.113815	0.189369	1.00982e-05	5.60569e-05
SP_1416	queA	15901270	S-adenosylmethionine--tRNA ribosyltransferase-isomerase	Cytoplasmic	342	38.4	5.95	45	98	13	High	0	64.684	301.55	3.93821e+07	1.43661e+07	3.211e+07	2.52663e+07	3.68297e+07	4.11122e+07	2.83218e+07	56481301	3.1659e+07	2.83777e+07	3.59348e+07	4.44728e+07	28753590	32618822	34391856	37972292	37296628	37727892	37080996	31146186	31281798	36054432	32121540	41581148	1.17995	0.0344402	0.0888434	1.10299	0.366635	0.473117	0.174318	0.202303
SP_1420	nadE	15901273	NAD synthetase (EC:6.3.1.5)	Cytoplasmic	274	30.1	5.22	64	114	13	High	0	82.069	424.87	3.19786e+07	8.96916e+06	2.10583e+07	1.6771e+07	2.55742e+07	2.81723e+07	2.69126e+07	6.44524e+07	3.56914e+07	2.85325e+07	3.63987e+07	3.78644e+07	23440866	19847274	22568702	24970080	25938178	25933850	35218400	35399524	35225824	36183160	32566110	35435920	1.16681	0.0393035	0.0964221	0.98433	0.629423	0.724627	8.56845e-06	4.98031e-05
SP_1421	SP_1421	15901274	nicotinate phosphoribosyltransferase (EC:2.4.2.11)	Cytoplasmic	486	55.1	5.27	62	265	29	High	0	149.134	791.37	1.29081e+08	3.98104e+07	8.34091e+07	6.92453e+07	8.85328e+07	1.02263e+08	6.02644e+07	1.50068e+08	8.28345e+07	7.13302e+07	9.69186e+07	9.79733e+07	92152904	94818160	89695608	106380064	89754720	93216528	79956976	80038576	81647600	91682704	86152984	91293664	1.04585	0.475882	0.589669	1.11375	0.00714322	0.0274809	0.0134833	0.0214588
SP_1423	SP_1423	15901276	transcriptional repressor	Cytoplasmic	69	7.7	6.55	41	2	2	High	0.002	8.195	5.65	445895	130126	285422	133762	199416	321525	134620	452587	188663	261211	356627	467669	352845	233148	299646	177515	200877	302664	162606	293349	187242	310427	328982	445044	0.768999	0.243218	0.355825	1.68603	0.0611861	0.121441	0.0956214	0.118784
SP_1429	SP_1429	15901282	U32 family peptidase	Cytoplasmic	428	47.9	5.34	57	109	20	High	0	108.274	353.09	1.41431e+07	5.047e+06	9.88546e+06	3.84424e+07	5.97901e+07	6.86816e+07	1.0545e+06	3.9882e+06	2.0767e+06	2.90564e+07	3.76931e+07	3.71853e+07	10482213	10859802	10546457	58209472	60629612	62905192	1.30624e+06	2.40289e+06	2.05686e+06	36955648	33721576	34783956	5.69937	2.52314e-07	0.000150022	18.2902	9.16135e-05	0.00271901	2.13071e-08	6.72854e-07
SP_1433	SP_1433	15901285	AraC family transcriptional regulator	Cytoplasmic	330	38.4	6.44	9	16	2	High	0	13.271	41.9	6.45514e+06	1.56842e+06	4.35148e+06	2.07161e+06	3.63342e+06	3.8479e+06						53415.9	4.87048e+06	3.18611e+06	4623551	2.92697e+06	3.67244e+06	3.57522e+06	na	na	na	na	na	51207	0.802407	0.241781	0.354167	na	na	na	0.241781	0.273199
SP_1445	guaA	15901295	GMP synthase (EC:6.3.5.2)	Cytoplasmic	520	57.4	5.08	69	715	41	High	0	300.74	2406.36	1.00878e+09	3.27367e+08	6.80304e+08	4.75431e+08	6.29534e+08	7.30864e+08	5.33861e+08	1.20748e+09	7.0375e+08	5.21995e+08	7.34922e+08	6.89913e+08	695251776	864826048	737481472	764497600	639897472	661655552	732822528	602200768	693058304	690068160	645072384	637969664	0.899237	0.284733	0.395237	0.972895	0.71626	0.791124	0.282136	0.312905
SP_1446	SP_1446	15901296	GntR family transcriptional regulator	Cytoplasmic	232	26.8	8.62	67	81	14	High	0	56.054	209.28	1.61972e+07	4.79973e+06	1.11618e+07	5.3239e+06	7.78598e+06	8.85323e+06	6.84497e+06	1.69408e+07	8.94724e+06	5.9599e+06	6.54652e+06	7.489e+06	12013313	10296228	11949341	7693537	7885706	8.18504e+06	8764085	9699091	8840512	7403852	5.92471e+06	7.04693e+06	0.693668	0.00247551	0.0148846	0.746254	0.0168158	0.0481095	0.000273847	0.000748556
SP_1448	SP_1448	15901298	hypothetical protein	Unknown	311	35.9	5.08	10	7	3	High	0.002	8.663	10.91	2.81696e+06	519645	2.06476e+06	1.69116e+06	1.37978e+06	1.36964e+06	894361	1.96008e+06	1.20562e+06	1.23178e+06	1.6914e+06	1.8432e+06	2.15811e+06	998982	2.18302e+06	2.37814e+06	1.39509e+06	1.27866e+06	1.10935e+06	1.2087e+06	1.19704e+06	1.49481e+06	1.54196e+06	1.74054e+06	0.946027	0.919907	0.949213	1.35909	0.00474447	0.0209999	0.43043	0.460353
SP_1449	SP_1449	15901299	C3-degrading proteinase	Cytoplasmic	241	27.4	4.72	38	89	10	High	0	54.325	271.28	3.53885e+07	1.35865e+07	2.52768e+07	1.91711e+07	2.49012e+07	2.8013e+07	1.60538e+07	3.64319e+07	1.97008e+07	2.10831e+07	2.6297e+07	2.55538e+07	25884296	30719448	27080654	28628152	25228460	25750868	20908942	20362394	19447196	26676472	23578810	23971774	0.951282	0.49109	0.60248	1.22248	0.0105705	0.0349706	0.00198732	0.00410463
SP_1450	SP_1450	15901300	platelet activating factor	Unknown	211	24.1	5.03	22	15	3	High	0	11.62	41.59	2.20901e+06	374118	1.25265e+06	1.12826e+06	2.39142e+06	2.691e+06	884882	2.4064e+06	958755	1.48813e+06	1.52937e+06	1.24513e+06	1698723	706848	1.32201e+06	1.57494e+06	2.41716e+06	2502390	1.09801e+06	1.47599e+06	948897	1.81562e+06	1.39687e+06	1.1842e+06	1.74228	0.117534	0.213799	1.24803	0.28271	0.386503	0.12129	0.146427
SP_1451	SP_1451	15901301	Cof family protein	Cytoplasmic	275	30.7	4.78	37	43	10	High	0	40.328	87.05	1.24751e+07	4.36478e+06	7.97307e+06	6.07315e+06	9.09114e+06	9.44735e+06	5.13238e+06	13624342	7.45176e+06	6.10119e+06	8.93679e+06	6.16098e+06	9312926	9307897	8491700	8805773	9202762	8737154	6543358	7.86197e+06	7.3599e+06	7580191	8.07048e+06	5799971	0.98647	0.727717	0.803666	0.985547	0.85947	0.906799	0.0342597	0.0484807
SP_1456	def	15901306	peptide deformylase (EC:3.5.1.88)	Cytoplasmic	203	22.7	5.22	78	192	13	High	0	89.53	624.06	1.21305e+08	3.74555e+07	9.41047e+07	7.84781e+07	1.00311e+08	1.16684e+08	1.18061e+08	2.27611e+08	1.51077e+08	1.14531e+08	1.69899e+08	1.66975e+08	86537504	89075160	101251976	121040192	101427560	106852752	158129792	119970872	148829312	148862000	150602976	155253008	1.18946	0.0720883	0.14877	1.06509	0.456627	0.56263	0.000733027	0.00175042
SP_1457	SP_1457	15901307	spoU rRNA methylase	Unknown	242	26.5	8.51	44	59	9	High	0	39.859	181.48	2.87564e+07	9.13138e+06	2.0249e+07	1.67267e+07	2.2978e+07	2.51726e+07	1.51562e+07	3.37118e+07	2.18205e+07	1.82625e+07	2.36904e+07	2.80125e+07	21136854	20218966	21602292	24817866	23301964	23187730	19722282	18900510	21518586	23090654	21261986	26210146	1.13262	0.0131708	0.0451505	1.17328	0.0933543	0.162476	0.0361701	0.0508245
SP_1458	trxB	15901308	thioredoxin reductase	Cytoplasmic	303	33.1	4.88	49	167	10	High	0	78.445	543.27	1.34555e+08	4.58811e+07	1.04448e+08	4.30569e+07	5.4208e+07	6.47764e+07	7.15954e+07	1.27577e+08	9.0818e+07	4.56098e+07	5.17743e+07	5.29295e+07	96360096	110127040	111949384	65514092	54947844	59351120	95197656	68662104	89529720	58272524	46239620	49397240	0.564675	0.00119658	0.00946685	0.607402	0.0153533	0.0447995	0.000320523	0.00086628
SP_1460	SP_1460	15901310	amino acid ABC transporter ATP-binding protein	CytoplasmicMembrane	247	27.4	6.43	59	83	12	High	0	59.9	247.04	3.15516e+07	1.01777e+07	2.32802e+07	1.47556e+07	2.3587e+07	2.25431e+07	1.88912e+07	40255559	2.08166e+07	1.69942e+07	2.22347e+07	2.31209e+07	23153106	22713080	24931672	21931112	23910292	20714782	24607338	22467630	20532230	21428382	19924632	21639396	0.940088	0.281802	0.391635	0.931741	0.304976	0.413091	0.27533	0.305922
SP_1461	SP_1461	15901311	amino acid ABC transporter permease	CytoplasmicMembrane	266	28.9	9.61	24	39	5	High	0	22.332	110.36	2.57541e+07	7.91731e+06	1.70899e+07	9.00215e+06	1.20595e+07	1.5127e+07	7.38303e+06	20899020	1.17007e+07	8.14993e+06	1.06479e+07	12336317	18972594	17416106	18274884	13179395	12252814	13929046	9467315	11910020	11554491	10168547	9558612	11550293	0.720064	0.00180195	0.0124324	0.949764	0.614713	0.711805	0.000201729	0.000588991
SP_1462	SP_1462	15901312	hypothetical protein	Cytoplasmic	118	13.4	6.13	85	132	10	High	0	64.831	472.65	1.10404e+08	3.12512e+07	6.46355e+07	3.57296e+07	5.24504e+07	5.9137e+07	4.97061e+07	1.19496e+08	6.61127e+07	3.83843e+07	6.16982e+07	6.04989e+07	78805816	73684448	69405736	54022712	53222960	54154728	65701092	63989816	65191124	48954556	55015336	56464720	0.72737	0.00102826	0.008882	0.82324	0.0116515	0.0372273	0.00011357	0.000369335
SP_1464	SP_1464	15901314	acetyltransferase	Cytoplasmic	164	18.3	4.61	38	25	4	High	0	21.956	110.34	3.08805e+07	8.3789e+06	1.97809e+07	1.21779e+07	1.68317e+07	2.2743e+07	7.44022e+06	1.77618e+07	1.03131e+07	5.82965e+06	9.62154e+06	6978736	22649304	18479320	21172856	17995372	17016444	20898016	9545502	10197952	10172891	7.24012e+06	8680281	6568876	0.897408	0.274097	0.386453	0.751739	0.0260078	0.0663199	5.29713e-06	3.51191e-05
SP_1465	SP_1465	15901315	hypothetical protein	Unknown	148	16.9	6.54	33	50	6	High	0	22.085	100.57	2.22205e+07	6.51423e+06	1.42669e+07	1.00518e+07	1.56173e+07	1.7691e+07	1.08217e+07	2.81065e+07	1.52278e+07	1.22864e+07	2.01468e+07	2.05915e+07	16369558	14176947	15271636	14830895	15800085	16314778	13937965	15855643	15007955	15434440	18051294	19306038	1.02461	0.640649	0.728778	1.17835	0.101588	0.173454	0.135829	0.162165
SP_1467	SP_1467	15901317	glutamine amidotransferase subunit PdxT	Cytoplasmic	193	21.1	5.21	20	7	3	High	0	10.256	14.14	1.36958e+06	351715	1.90741e+06	2.04407e+06	2.75069e+06	3.31591e+06	2.37071e+06	4.60614e+06	2.53809e+06	1.20216e+06	1.21385e+06	1.10609e+06	1.06216e+06	663270	2.02346e+06	2.88356e+06	2.78155e+06	3.08528e+06	2986408	2.76292e+06	2.51136e+06	1.45785e+06	1106369	1.05205e+06	2.33413	0.0428148	0.100853	0.437768	0.00180139	0.0112395	0.00601528	0.0105224
SP_1468	SP_1468	15901318	pyridoxal biosynthesis lyase PdxS	Cytoplasmic	291	31.7	5.34	37	130	10	High	0	68.065	403.56	3.82481e+07	1.09749e+07	2.37497e+07	1.50885e+07	2.22994e+07	2.35041e+07	3.22697e+07	6.89536e+07	4.04257e+07	1.78393e+07	2.74194e+07	2.80584e+07	27893422	24586490	25361380	22386346	22592204	21630892	42410312	37784104	39859696	22451132	24558566	26303406	0.855708	0.0183987	0.0573606	0.610667	0.000955025	0.00789769	1.01829e-05	5.60569e-05
SP_1469	nox	15901319	NADH oxidase	Cytoplasmic	459	50.2	5.12	51	559	23	High	0	200.616	1948.51	1.31917e+09	4.90614e+08	9.69231e+08	5.92542e+08	7.2401e+08	8.22312e+08	8.38892e+08	1.56375e+09	1.07312e+09	6.04979e+08	8.4286e+08	8.43626e+08	904275456	1325012736	1052394688	959477248	735451904	743600704	1159604992	769837888	1053030400	801433920	739209856	779746560	0.743073	0.10689	0.199413	0.778009	0.133141	0.213353	0.106872	0.131131
SP_1471	SP_1471	15901321	oxidoreductase	Cytoplasmic	201	22.6	5.3	62	118	13	High	0	57.359	315.33	2.11333e+07	6.1035e+06	1.38821e+07	2.97577e+07	4.50759e+07	4.63704e+07	1.25513e+07	3.18216e+07	1.53699e+07	3.27618e+07	4.80329e+07	5.05821e+07	15572694	13241285	14842755	44901048	45715680	42567804	16300471	17869480	15205264	41723836	42868404	47257620	3.05072	2.91693e-05	0.00179235	2.67037	8.19971e-05	0.00260854	4.10427e-08	1.01521e-06
SP_1472	SP_1472	15901322	oxidoreductase	Unknown	414	45.8	5.2	39	126	15	High	0	94.236	411.86	3.09584e+07	1.10764e+07	2.05639e+07	4.03913e+07	5.63584e+07	6.53504e+07	1.59733e+07	3.64567e+07	2.72465e+07	3.92238e+07	5.15817e+07	4.92161e+07	22721312	24821080	22031752	61315460	57179744	59898080	20777034	20416480	26844388	49988672	46062168	45955128	2.56407	2.16365e-05	0.00179235	2.08716	0.0013134	0.00933709	1.3265e-06	1.21512e-05
SP_1473	SP_1473	15901323	hypothetical protein	Cytoplasmic	85	9.9	8.4	47	44	5	High	0	33.58	142.55	2.79206e+07	6.90478e+06	1.76974e+07	1.7229e+07	2.39737e+07	2.67419e+07	7.99444e+06	1.5604e+07	1.0464e+07	7.8813e+06	9.49093e+06	1.1925e+07	20488046	15069693	18918780	25578948	24315934	24560966	10262696	8976960	10370280	9827080	8563730	11176087	1.36675	0.0264377	0.0732216	0.998546	0.956423	0.973204	1.49632e-05	7.48161e-05
SP_1474	glyS	15901324	glycyl-tRNA synthetase subunit beta (EC:6.1.1.14)	Cytoplasmic	678	75.4	5	55	441	36	High	0	235.201	1415.66	3.12042e+08	9.41209e+07	2.18848e+08	1.47555e+08	2.1995e+08	2.4418e+08	1.73412e+08	4.33569e+08	2.32875e+08	1.96789e+08	2.69291e+08	2.75661e+08	219364096	233956896	236441648	231675744	223275808	222040752	233235680	223513232	229574064	256923248	237609632	256089600	0.981486	0.534025	0.645257	1.09369	0.0349382	0.0810062	0.0219796	0.0329693
SP_1478	SP_1478	15901328	aldo/keto reductase	Cytoplasmic	280	31.4	5.21	58	181	13	High	0	74.785	530.81	1.89171e+08	5.96139e+07	1.22113e+08	7.49314e+07	1.05964e+08	1.17482e+08	6.88722e+07	1.67569e+08	9.36369e+07	5.34623e+07	7.56868e+07	7.2149e+07	134088584	144861360	131408872	115360344	107518144	106852752	91552544	89304896	92288376	68520144	67410600	67245680	0.803519	0.00477811	0.0231173	0.743839	1.36301e-05	0.00114201	5.14523e-08	1.16496e-06
SP_1479	pgdA	15901329	peptidoglycan N-acetylglucosamine deacetylase A	Extracellular	463	52.7	5.59	35	129	16	High	0	81.847	348.53	2.06302e+07	6.79872e+06	1.28633e+07	1.21156e+07	1.7501e+07	1.85242e+07	1.03297e+07	2.46539e+07	1.31058e+07	1.60301e+07	1.77716e+07	2.12404e+07	15210240	14840555	13770823	17844306	17726028	17048460	13282740	13997238	12935949	20150906	15998180	19866112	1.20075	0.00516894	0.0243024	1.39286	0.0139633	0.0422137	0.00191319	0.00399275
SP_1482	SP_1482	15901332	Gfo/Idh/MocA family oxidoreductase	Unknown	325	36.4	6.21	39	107	8	High	0	66.352	424.56	3.8548e+07	1.18042e+07	2.67937e+07	1.17504e+07	2.05428e+07	2.58856e+07	37950103	92079527	5.25993e+07	29232133	4.06016e+07	3.68365e+07	28108536	26466592	28692786	17391476	20767274	23828654	50022276	49950048	51885832	37084416	36298356	34411384	0.744433	0.0325768	0.0855508	0.709834	0.000176213	0.0035647	7.08165e-06	4.4031e-05
SP_1483	SP_1483	15901333	DEAD/DEAH box helicase	Cytoplasmic	360	41.3	7.96	25	54	10	High	0	45.356	148.25	1.53718e+07	5.07646e+06	1.07306e+07	1.02349e+07	1.45339e+07	1.58453e+07	8.49073e+06	2.03915e+07	1.05416e+07	8.43401e+06	1.20257e+07	1.10962e+07	11430492	10927512	11413813	14981218	14685161	14571527	10915317	11634500	10370280	10522815	10812497	10427538	1.30991	8.99359e-05	0.00297735	0.964847	0.376549	0.485376	7.4793e-06	4.51013e-05
SP_1491	SP_1491	15901339	glycerol uptake facilitator protein	CytoplasmicMembrane	289	30.7	9.04	10	27	3	High	0	14.861	65.05	7.93317e+07	2.76479e+07	6.14297e+07	4.17652e+07	4.70406e+07	4.92717e+07	4.10103e+07	1.01533e+08	5.76032e+07	5.06248e+07	6.44975e+07	6.51751e+07	57147608	64570024	65954204	63491668	47643148	45214748	54036236	55131192	56814028	64755820	57495776	60833792	0.833101	0.168978	0.27577	1.10305	0.059844	0.1202	0.168526	0.196723
SP_1498	pgm	15901345	phosphoglucomutase	Cytoplasmic	572	62.6	4.82	76	1028	40	High	0	345.759	3727.02	9.08428e+08	3.09572e+08	6.38299e+08	4.79425e+08	6.11373e+08	7.01093e+08	5.34107e+08	1.24556e+09	7.37339e+08	6.0414e+08	7.57304e+08	7.02062e+08	626239616	817697920	691755264	771089856	620584448	634633024	732822528	621435392	725521152	800092288	664255616	649019520	0.948782	0.647526	0.735166	1.01615	0.874264	0.916454	0.950811	0.95639
SP_1499	bta	15901346	bacterocin transport accessory protein	Unknown	115	12.9	5.92	81	210	11	High	0	104.775	846.91	3.88733e+08	8.66962e+07	2.50364e+08	8.82983e+07	1.21217e+08	1.49511e+08	2.35354e+08	5.06957e+08	2.92655e+08	1.20946e+08	1.54074e+08	1.33426e+08	272416928	214685328	270052352	136533024	122744928	136825056	318354208	259757984	288640768	156739344	136514736	123752800	0.523147	0.00169481	0.0117628	0.481114	0.00125089	0.00900423	3.15895e-05	0.000134902
SP_1500	SP_1500	15901347	amino acid ABC transporter amino acid-binding protein	Unknown	278	31	4.94	76	577	31	High	0	233.648	1915.35	5.97782e+08	1.84458e+08	4.09651e+08	2.49691e+08	3.31448e+08	3.40852e+08	4.3699e+08	8.28346e+08	5.25748e+08	2.51306e+08	3.30336e+08	3.14364e+08	415548608	472944736	443760960	396262848	336034880	309803264	597814592	417333632	517939680	328453408	291110528	291203872	0.782209	0.0375517	0.0943648	0.594074	0.010247	0.0343835	0.00303202	0.00584956
SP_1501	SP_1501	15901348	amino acid ABC transporter ATP-binding protein	CytoplasmicMembrane	209	23.1	5.06	77	116	13	High	0	100.053	503.9	2.13923e+08	7.39512e+07	1.58667e+08	7.5894e+07	1.03055e+08	1.02798e+08	1.49637e+08	2.57493e+08	1.75818e+08	5.94728e+07	7.46104e+07	8.57558e+07	151486240	181802832	171443616	116937568	104472720	94125792	201773408	134691488	173449840	76317416	66437088	79969440	0.625155	0.00467486	0.022712	0.436787	0.00329789	0.0159818	0.000162876	0.000493564
SP_1502	SP_1502	15901349	amino acid ABC transporter permease	CytoplasmicMembrane	213	24	9.64	26	61	5	High	0	26.855	158.29	1.15525e+08	3.83792e+07	80117724	4.39935e+07	4.3786e+07	3.90185e+07	66075845	1.31541e+08	77594000	3.41916e+07	4.23618e+07	4.83686e+07	83024656	91320432	86132744	66915056	44397052	35809244	87774416	70735048	76523744	43530052	37897156	45210776	0.564813	0.0310493	0.0821483	0.538809	0.00172922	0.0109052	0.00219416	0.00446269
SP_1504	SP_1504	15901351	hypothetical protein	Cytoplasmic	409	47.5	4.27	25	51	8	High	0	45.182	145.46	2.91525e+07	8.90871e+06	2.01325e+07	1.51442e+07	2.18787e+07	2.23755e+07	1.39496e+07	3.51704e+07	1.90796e+07	1.77252e+07	2.20527e+07	2.27768e+07	21425110	19707930	21494902	22386346	22186676	20623190	18010078	19713124	18855346	22323316	19835424	21359416	1.04101	0.354009	0.46725	1.12265	0.0561097	0.114663	0.0375762	0.0525541
SP_1505	SP_1505	15901352	hypothetical protein	CytoplasmicMembrane	388	43.3	9.11	17	44	5	High	0	21.983	96.9	2.4906e+07	7.16243e+06	1.619e+07	6.29367e+06	9.57699e+06	1.02598e+07	7.04426e+06	1.84176e+07	1.12857e+07	6.93824e+06	8.17866e+06	1.19919e+07	18322522	15666261	17309350	9132675	9699251	9519023	9024445	10530038	11159754	8639538	7388593	11269649	0.55267	0.000272866	0.00448115	0.888766	0.403374	0.511321	0.000911491	0.00213214
SP_1506	pgl	15901353	6 phosphogluconolactonase	Cytoplasmic	337	37.7	5.31	30	103	9	High	0	53.224	275.89	4.66816e+07	1.32498e+07	2.98262e+07	2.28622e+07	3.16926e+07	3.79815e+07	2.63876e+07	6.26808e+07	3.5586e+07	2.20305e+07	3.57508e+07	3.54934e+07	33976936	29771822	31918266	34288584	32124080	34895464	34553628	34444120	35127184	27830466	32032716	33200336	1.05897	0.272515	0.385588	0.893768	0.100822	0.172649	0.165014	0.193376
SP_1507	atpC	15901354	ATP synthase FF1 subunit epsilon (EC:3.6.3.14)	Cytoplasmic	139	15.6	6.39	37	82	7	High	0	41.145	245.23	3.48344e+07	1.19232e+07	2.35394e+07	1.91656e+07	3.17831e+07	3.42967e+07	2.07923e+07	5.96799e+07	2.62362e+07	2.69041e+07	3.98409e+07	3.3389e+07	25453410	26702054	25146574	28628152	32225502	31513492	27122016	32849740	25858190	34124348	35587672	31243732	1.19489	0.0121176	0.0426863	1.17623	0.11429	0.18989	0.0188235	0.0289592
SP_1508	SP_1508	15901355	ATP synthase FF1 subunit beta (EC:3.6.3.14)	CytoplasmicMembrane	468	50.9	4.94	88	1073	39	High	0	384.494	3990.13	1.19424e+09	4.17255e+08	8.43484e+08	5.71902e+08	8.39033e+08	9.42175e+08	6.96447e+08	1.50324e+09	8.74732e+08	6.84825e+08	9.29977e+08	8.82369e+08	816741440	1116236416	915044032	924699328	852369344	851585472	959136000	741199360	861257408	908975872	814985664	814719040	0.922975	0.489243	0.601114	0.991055	0.956833	0.973204	0.62159	0.648616
SP_1509	SP_1509	15901356	ATP synthase FF1 subunit gamma (EC:3.6.3.14)	Cytoplasmic	292	32.3	5.2	49	219	15	High	0	119.748	782.83	2.06937e+08	6.99066e+07	1.42965e+08	1.0091e+08	1.41907e+08	1.47758e+08	1.15218e+08	2.72249e+08	1.39704e+08	9.91764e+07	1.40596e+08	1.50812e+08	146618960	171245328	154125936	156670864	144066064	135009232	154046768	142283440	137995504	128146296	125061360	140432800	0.92321	0.273763	0.38645	0.906325	0.110265	0.185037	0.0699087	0.0894355
SP_1510	atpA	15901357	ATP synthase FF1 subunit alpha (EC:3.6.3.14)	Cytoplasmic	501	54.6	5.1	48	526	20	High	0	121.689	1591.59	6.40607e+08	2.09101e+08	4.40118e+08	3.01249e+08	4.0448e+08	4.44811e+08	3.54524e+08	7.97311e+08	4.51254e+08	3.18982e+08	4.36555e+08	4.15583e+08	444872256	540609216	476365568	479214112	410207616	403765024	484052704	402221696	444142144	418830112	384808064	385379712	0.884625	0.196569	0.303361	0.893719	0.14179	0.224453	0.103886	0.128255
SP_1511	atpH,atpX	15901358	ATP synthase FF1 subunit delta (EC:3.6.3.14)	Cytoplasmic	178	20.5	8.06	69	127	11	High	0	71.139	368.9	5.11783e+07	1.15431e+07	3.26139e+07	2.05003e+07	2.91936e+07	3.46039e+07	2.75369e+07	6.91419e+07	3.69845e+07	2.62469e+07	3.33682e+07	3.72104e+07	37189208	25760822	34929732	30614192	29588810	31787816	36016452	37836952	36507472	33224222	29898530	34783956	0.939835	0.686311	0.76872	0.887151	0.06154	0.121935	0.27697	0.307459
SP_1512	atpF	15901359	ATP synthase FF1 subunit B (EC:3.6.3.14)	CytoplasmicMembrane	164	18	5.43	59	181	14	High	0	91.14	593.07	181110597	6.64465e+07	1.27761e+08	1.01894e+08	1.43359e+08	1.59007e+08	1.17239e+08	2.56831e+08	1.52096e+08	1.0866e+08	1.53787e+08	1.55655e+08	128513488	162256896	137898256	158259712	145081024	144993440	156768256	134691488	149814320	140990528	136514736	145064768	1.04588	0.550076	0.657834	0.957614	0.43733	0.545343	0.773125	0.79508
SP_1517	greA	15901363	transcription elongation factor GreA	Cytoplasmic	160	17.6	4.56	71	337	17	High	0	119.953	1085.31	3.45939e+08	8.0585e+07	2.09051e+08	1.29683e+08	2.33569e+08	2.64826e+08	2.34743e+08	5.63243e+08	3.2559e+08	1.86895e+08	2.84098e+08	2.75887e+08	242816256	198859264	225602032	202872112	237495392	241053504	318354208	287442144	321123360	243704048	250772320	256089600	1.0212	0.803376	0.861763	0.809742	0.00542397	0.0230448	0.00281208	0.00547807
SP_1518	SP_1518	15901364	conserved_hypothetical_protein	Unknown	551	60.8	5.16	78	726	44	High	0	345.585	2565.21	5.03654e+08	1.67814e+08	3.47218e+08	2.48281e+08	3.37805e+08	3.67277e+08	3.04248e+08	7.61045e+08	4.1724e+08	3.28107e+08	4.64939e+08	4.49429e+08	351309248	429875552	375324256	393018336	343146464	333304704	413503232	384646720	410685312	430813920	409302432	415829760	0.924739	0.378651	0.491656	1.03897	0.235022	0.335231	0.103475	0.127879
SP_1519	SP_1519	15901365	acetyltransferase	Cytoplasmic	164	18.8	4.83	14	4	2	High	0.002	5.925	10.35	1494700	557362	1.13526e+06	772106	1.62724e+06	1.78224e+06	867990	2.65614e+06	1.1583e+06	1.11524e+06	1.85846e+06	2.12606e+06	1.15345e+06	1.07372e+06	1.20524e+06	1.06626e+06	1648043	1659198	1.07659e+06	1623747	1.14761e+06	1359356	1.69603e+06	2.01373e+06	1.27418	0.211284	0.321195	1.31736	0.17724	0.268955	0.183659	0.212288
SP_1520	SP_1520	15901366	acetyltransferase	Cytoplasmic	154	17.4	4.55	27	6	3	High	0	11.175	15.57	768964	432909	578038	135277	994543	487351	719433	1.81521e+06	648334	1.13422e+06	1.55162e+06	1.92353e+06	602440	824323	609420	178871	1.00563e+06	456832	889143	1.12514e+06	641366	1.37166e+06	1415009	1.81592e+06	0.806083	0.441777	0.556276	1.73313	0.0376697	0.0848111	0.0609183	0.0796318
SP_1521	murC	15901367	UDP-N-acetylmuramate--L-alanine ligase (EC:6.3.2.8)	Cytoplasmic	444	49.9	5.77	61	193	17	High	0	110.777	636.68	9.09679e+07	2.63948e+07	63095661	5.12581e+07	7.9112e+07	1.02799e+08	5.38974e+07	1.55066e+08	8.44438e+07	6.80515e+07	9.79723e+07	9.77904e+07	65416912	61626668	67787720	78302560	80214784	94125792	71344368	82616096	83223800	87512288	87124392	91108312	1.29673	0.0159536	0.0519607	1.12042	0.090186	0.160046	0.00347418	0.00657574
SP_1522	SP_1522	15901368	hypothetical protein	Cytoplasmic	205	23.8	9.11	16	38	4	High	0	14.525	83.7	1.03198e+07	4.8624e+06	7.63321e+06	6.67728e+06	8.04146e+06	9.81267e+06	7.55603e+06	1.68079e+07	9.5614e+06	8.3772e+06	1.13684e+07	1.16479e+07	7.70065e+06	10431363	8.12802e+06	9712839	8138974	9068347	9701893	9643619	9442566	10459530	10275245	10895441	1.02514	0.784838	0.848906	1.09873	0.00808587	0.0292942	0.130034	0.155729
SP_1523	SP_1523	15901369	Snf2 family protein	Cytoplasmic	1032	118.2	5.08	17	77	15	High	0	49.429	132.94	1.1635e+07	4.42064e+06	8.3666e+06	5.95102e+06	9.16201e+06	9.14779e+06	5.976e+06	1.53948e+07	8.64365e+06	6.35044e+06	8.20821e+06	8.8219e+06	8654045	9442410	8919622	8627566	9273693	8461118	7.64597e+06	8865688	8534528	7.8953e+06	7.41553e+06	8293009	0.975803	0.550659	0.657857	0.942413	0.347497	0.454996	0.0813188	0.102288
SP_1524	SP_1524	15901370	class II aminotransferase	Unknown	388	44.5	5.72	24	52	7	High	0	35.704	145.24	1.17995e+07	2.61695e+06	7.1714e+06	5.33389e+06	7.71296e+06	8.61349e+06	2.96218e+06	1.01643e+07	5.57695e+06	4.7772e+06	7.07641e+06	6.60707e+06	8800524	5453745	7.63613e+06	7708325	7804669	7.96413e+06	3742942	5.95334e+06	5.51374e+06	5.9198e+06	6400928	6.22197e+06	1.07249	0.56402	0.66843	1.21911	0.209511	0.307195	0.0583131	0.0764762
SP_1525	SP_1525	15901371	cystathionine gamma-synthase (EC:2.5.1.48)	Cytoplasmic	364	40.1	5.27	27	53	7	High	0	36.55	132.08	1.43957e+07	4.21641e+06	9.61143e+06	6.47163e+06	1.13354e+07	1.5512e+07	7.92321e+06	2.30431e+07	1.21085e+07	8.47538e+06	1.15865e+07	1.23812e+07	10701184	8994452	10246708	9400351	11442107	14296196	10171372	13064913	11949196	10586098	10454352	11643842	1.17354	0.324456	0.436854	0.928914	0.437387	0.545343	0.488912	0.518282
SP_1527	SP_1527	15901372	oligopeptide ABC transporter oligopeptide-binding protein AliB	Cellwall	652	72.5	5.39	67	700	45	High	0	341.118	2417.26	4.18385e+08	1.85711e+08	3.20234e+08	5.35377e+08	7.42208e+08	8.13844e+08	4.24767e+08	1.03867e+09	5.61882e+08	4.61803e+08	6.15905e+08	5.94008e+08	292346912	478342528	346006656	863510976	753754112	736397248	581147072	520217088	553361088	609714752	541242368	549523712	2.1077	0.00747286	0.0311558	1.02765	0.614381	0.711805	0.00113623	0.00256293
SP_1529	SP_1529	15901374	polysaccharide biosynthesis protein	CytoplasmicMembrane	540	60.1	9.72	2	1	1	High	0.002	4.952	3.7	2.12921e+06	414353	1.41686e+06	490330	718929	711332	328984	1.32603e+06	659495	587621	729511		1.63832e+06	786400	1.50257e+06	669483	726499	665724	401874	830868	652246	707298	669638	na	0.524969	0.0629762	0.132307	1.09571	0.660068	0.745915	0.0718831	0.0914737
SP_1530	murE	15901375	UDP-N-acetylmuramoylalanyl-D-glutamate--L-lysine ligase (EC:6.3.2.13)	Cytoplasmic	481	53.7	5.63	45	145	20	High	0	89.798	379.47	4.86821e+07	1.45999e+07	3.19002e+07	2.23898e+07	3.64638e+07	3.73443e+07	2.04892e+07	4.81217e+07	2.58176e+07	2.11708e+07	3.14018e+07	3.17151e+07	35405236	33094574	34176728	33522342	36992388	34255848	26724696	26658318	25463642	26804568	28119216	29659424	1.02039	0.610801	0.704445	1.07276	0.103905	0.176638	7.02656e-05	0.000257069
SP_1531	SP_1531	15901376	hypothetical_protein	Cytoplasmic	65	6.8	4.93	62	46	6	High	0	37.951	166.66	8.50059e+06	2.98108e+06	5.67795e+06	4.09114e+06	7.21854e+06	7.28898e+06	2.82354e+07	5.90043e+07	3.47187e+07	1.49157e+07	2.38929e+07	2.33037e+07	6.37694e+06	6242851	6.04364e+06	5.87784e+06	7308266	6.74864e+06	36947820	32477342	34239828	18746930	21440242	21826016	1.06812	0.39664	0.510465	0.598208	0.00107162	0.0084933	7.09493e-09	2.74642e-07
SP_1534	ppaC	15901378	manganese-dependent inorganic pyrophosphatase (EC:3.6.1.1)	Cytoplasmic	311	33.5	4.64	63	199	14	High	0	104.324	748.02	3.30324e+08	9.78178e+07	2.35506e+08	1.35248e+08	1.80286e+08	2.01188e+08	1.94997e+08	3.98275e+08	2.51632e+08	1.47351e+08	2.05995e+08	2.11976e+08	231785152	243622192	254870528	210864384	182652368	183083632	263391552	205566352	248279760	190935488	182271728	196906048	0.789563	0.0122833	0.04301	0.794874	0.0451126	0.0972741	0.00898486	0.0150374
SP_1536	SP_1536	15901380	hypothetical protein	Cytoplasmic	249	28.3	6.32	34	49	7	High	0	37.113	142.77	1.25006e+07	4.77415e+06	8.16258e+06	6.37356e+06	9.33959e+06	1.0413e+07	5.64738e+06	1.59664e+07	7.68141e+06	8.74636e+06	1.17615e+07	1.04815e+07	9312926	10228689	8694961	9251624	9456085	9610999	7.21758e+06	9199368	7.58694e+06	10927944	10633429	9866011	1.00291	0.922524	0.949867	1.30926	0.0266581	0.0672247	0.0202009	0.0307628
SP_1537	SP_1537	15901381	hypothetical protein	Cytoplasmic	119	13.8	8.97	22	32	4	High	0	19.432	99.68	7.37242e+06	1.33505e+06	3.74537e+06	2.96765e+06	6.17725e+06	5.78437e+06	2.25313e+06	6.45022e+06	2.61357e+06	2.41615e+06	4.71603e+06	5.24987e+06	5543395	2.69807e+06	3.98347e+06	4.23584e+06	6254803	5.35684e+06	2.83288e+06	3822625	2.58052e+06	2.96882e+06	4.27836e+06	4946204	1.29632	0.289097	0.399392	1.3202	0.233611	0.334586	0.178423	0.206868
SP_1538	SP_1538	15901382	Cof family protein/peptidyl-prolyl cis-trans isomerase, cyclophilin type	Cytoplasmic	466	52	4.96	50	257	20	High	0	130.284	720.52	2.9579e+08	9.42908e+07	2.07567e+08	1.16621e+08	1.71434e+08	1.8046e+08	1.33072e+08	2.89838e+08	173376043	1.14557e+08	1.51686e+08	1.50919e+08	208311472	234478416	224518720	182126496	173512688	164044272	178566720	151374512	170495280	148862000	134753328	140432800	0.778775	0.00554013	0.0256341	0.847356	0.0452088	0.0973025	0.000173313	0.00051994
SP_1539	rpsR	15901383	3S ribosomal protein S18	Cytoplasmic	79	9.2	10.8	46	166	9	High	0	59.514	577.72	2.53142e+08	9.41702e+07	1.79071e+08	1.48786e+08	1.94336e+08	2.03834e+08	1.73252e+08	4.1354e+08	2.42817e+08	2.2621e+08	2.72107e+08	2.79275e+08	178554576	234218032	193099824	233279216	196869312	185802912	233235680	213549376	239418672	295307168	240242880	258862272	1.01664	0.87041	0.914322	1.15769	0.107237	0.180991	0.0527146	0.0696583
SP_1540	SP_1540	15901384	single-stranded DNA-binding protein	Cytoplasmic	156	17.3	5.57	83	135	10	High	0	63.372	486.33	1.15541e+08	4.0097e+07	8.10483e+07	6.62042e+07	1.06412e+08	1.15319e+08	8.7005e+07	1.72332e+08	1.02841e+08	8.41543e+07	1.1596e+08	1.2498e+08	83024656	95568280	87104304	101660800	107518144	105035376	116028760	91359544	101549240	108521264	103015880	116337464	1.1826	0.0189053	0.0583162	1.0613	0.462173	0.566489	0.046106	0.0623055
SP_1541	rpsF	15901385	3S ribosomal protein S6	Cytoplasmic	96	11.1	5.27	92	327	11	High	0	110.023	1365.65	5.85729e+08	1.77867e+08	4.0123e+08	3.19126e+08	4.72304e+08	5.21731e+08	4.56649e+08	1.0376e+09	6.0261e+08	5.09258e+08	6.37518e+08	7.21754e+08	407359392	456771968	433981472	508575104	479309888	473260576	625616960	520217088	593698880	672647296	560446528	667438720	1.12559	0.0405876	0.0973041	1.09255	0.338356	0.449481	0.00143847	0.00312146
SP_1544	SP_1544	15901387	aspartate aminotransferase (EC:2.6.1.1)	Unknown	395	43	4.82	67	159	19	High	0	116.606	553.6	1.48564e+08	4.57929e+07	9.57291e+07	5.68476e+07	8.29352e+07	9.25118e+07	6.52929e+07	1.56123e+08	7.94603e+07	5.30341e+07	7.46297e+07	7.11955e+07	106164200	109874856	102980592	86908184	84071128	84574864	86695656	83131288	78395976	67870832	66437088	66409448	0.801061	0.000484391	0.00582268	0.808617	0.00214402	0.0122175	8.92567e-07	9.15453e-06
SP_1545	SP_1545	15901388	hypothetical protein	CytoplasmicMembrane	162	18.3	7.23	27	24	5	High	0	25.424	78.12	2997196	779117	1927516	2.13031e+06	5.0145e+06	5.77988e+06	1.52019e+06	3.79676e+06	1.9663e+06	2.67436e+06	5.55896e+06	5.24811e+06	2293297	1.52686e+06	2.04473e+06	3013867	5.06983e+06	5.35684e+06	1.90198e+06	2.2922e+06	1.94817e+06	3.27999e+06	5034488	4946204	2.29169	0.0208746	0.0619333	2.1589	0.00764039	0.028542	0.00283869	0.00552095
SP_1546	SP_1546	15901389	conserved_domain_protein	Unknown	182	19.8	5.19	82	231	15	High	0	98.177	805.04	3.89798e+08	1.12691e+08	2.63164e+08	1.07546e+08	1.499e+08	1.61032e+08	3.81569e+08	7.60531e+08	4.5563e+08	1.82651e+08	2.4175e+08	2.44208e+08	273105120	283510400	284153632	167796880	152188432	146807760	521470624	384646720	449064224	238419744	213905120	226505968	0.555198	0.000148298	0.00314391	0.500915	0.00183479	0.0113274	3.40729e-06	2.52392e-05
SP_1547	SP_1547	15901390	hypothetical protein	CytoplasmicMembrane	242	27.5	8.87	22	22	5	High	0	22.195	52.94	4.85353e+06	1.21661e+06	3.28443e+06	1.79934e+06	2.61025e+06	3.10936e+06	3.33247e+06	7.60292e+06	3.9133e+06	2.44938e+06	4.05761e+06	3.61224e+06	3.67556e+06	2.44504e+06	3.48235e+06	2.53674e+06	2639845	2.89105e+06	4218632	4479592	3864632	3.00614e+06	3683659	3406004	0.840119	0.296842	0.406718	0.803623	0.0393938	0.0875169	0.0209657	0.0316862
SP_1548	SP_1548	15901391	hypothetical protein	CytoplasmicMembrane	531	59.4	5.78	57	218	29	High	0	152.744	627.16	9.1946e+07	2.72136e+07	5.87405e+07	5.16203e+07	7.27067e+07	7.60239e+07	1.73928e+07	3.76644e+07	2.29271e+07	2.25765e+07	2.87461e+07	3.40538e+07	66051964	63588292	63042720	78771304	73719816	69555264	22624896	21064918	22603518	28600158	25716116	31896020	1.15239	0.0220114	0.0630598	1.30047	0.0175455	0.0493898	3.65952e-08	9.54657e-07
SP_1549	SP_1549	15901392	peptide deformylase (EC:3.5.1.88)	Cytoplasmic	136	15.4	5.53	18	6	1	High	0.002	6.077	35.41	4.02739e+06	1.26409e+06	3.1064e+06	1.7611e+06	2.28605e+06	3349324							3.06433e+06	2.52925e+06	3.30116e+06	2.47904e+06	2.31595e+06	3.11302e+06	na	na	na	na	na	na	0.889065	0.373804	0.487534	na	na	na	0.373806	0.406679
SP_1550	SP_1550	15901393	glutathione S-transferase	Unknown	263	29.5	5.2	45	99	13	High	0	50.558	243.82	5.20192e+07	1.92878e+07	3.40963e+07	2.77094e+07	3.65807e+07	4.00285e+07	2.50048e+07	4.65512e+07	3.15198e+07	2.83724e+07	3.3539e+07	3.67169e+07	37759760	44358072	36543564	41664184	37093660	36722912	32693184	25854386	31084624	36054432	29987492	34318264	0.973196	0.745165	0.816539	1.11969	0.27078	0.374664	0.0280848	0.0407026
SP_1551	SP_1551	15901394	cation transporter E1-E2 family ATPase	CytoplasmicMembrane	898	97	4.98	48	376	37	High	0	226.973	1253.09	1.76354e+08	5.77826e+07	1.16724e+08	9.13504e+07	1.30322e+08	1.4485e+08	9.65463e+07	1.96164e+08	1.18781e+08	9.82209e+07	1.18734e+08	1.25284e+08	125026488	140273456	126001896	141442352	131882392	132286424	128908896	103654640	117311016	126836376	105662992	116337464	1.03657	0.446206	0.560642	0.997034	0.983744	0.988802	0.104583	0.128751
SP_1552	SP_1552	15901395	cation efflux family protein	CytoplasmicMembrane	394	44.5	5.35	16	26	4	High	0	17.577	67.84	9.93962e+06	2.20955e+06	5.38834e+06	4.39143e+06	4.72915e+06	5.26916e+06	5.21499e+06	1.5099e+07	7.31018e+06	4.85566e+06	6.06191e+06	7.59622e+06	7.43628e+06	4.56163e+06	5.73387e+06	6.31961e+06	4786262	4886380	6.64703e+06	8698695	7.2217e+06	6020262	5.48421e+06	7150011	0.901898	0.612978	0.704658	0.826611	0.162459	0.250486	0.174226	0.202303
SP_1553	SP_1553	15901396	ABC transporter ATP-binding protein	Cytoplasmic	623	70.9	5.08	48	181	26	High	0	134.035	486.34	6.45812e+07	1.9216e+07	4.38179e+07	3.4581e+07	5.57576e+07	5.65422e+07	35371402	8.41336e+07	4.05581e+07	3.80036e+07	5.57243e+07	5.62959e+07	46726248	44116868	46985484	52319168	56571020	51783788	46547744	45749724	40056812	48437488	49698024	52559376	1.16575	0.0112988	0.0406618	1.13857	0.0689954	0.132675	0.00964626	0.0160326
SP_1554	SP_1554	15901397	tRNA CCA-pyrophosphorylase (EC:2.7.7.21 2.7.7.25)	Cytoplasmic	394	45.1	4.83	37	89	13	High	0	58.251	267.03	1.82227e+07	6.32274e+06	1.47143e+07	9.10557e+06	1.39291e+07	1.31547e+07	1.07927e+07	2.85434e+07	1.54418e+07	1.15229e+07	1.57475e+07	1.65088e+07	13468188	13742985	15700511	13344339	14077042	12184382	13937965	16073748	15205264	14417098	14122060	15476779	0.92296	0.28133	0.391473	0.973438	0.63011	0.724627	0.192823	0.221635
SP_1555	dapB	15901398	dihydrodipicolinate reductase (EC:1.3.1.26)	Cytoplasmic	255	27.8	4.86	62	128	11	High	0	69.369	447.47	9.86396e+07	2.96782e+07	7.38039e+07	3.36964e+07	5.7736e+07	5.91663e+07	3.11912e+07	9.40473e+07	4.44939e+07	2.64027e+07	3.77748e+07	3.59756e+07	70777776	69736104	79332344	50926240	58498816	54245896	40943592	50945812	43901556	33481402	33810476	33666156	0.744479	0.00668417	0.02919	0.743481	0.0105836	0.0349706	9.42188e-06	5.34407e-05
SP_1557	SP_1557	15901400	degV family protein	Cytoplasmic	282	30.9	4.79	29	90	9	High	0	45.339	294.79	4.78974e+07	1.79e+07	3.39444e+07	2.64715e+07	3.48364e+07	3.9069e+07	2.59756e+07	5.93309e+07	3.08298e+07	2.26846e+07	2.87605e+07	2.70131e+07	34833948	40987044	36328336	39817308	35268048	35900692	34021916	32636984	30394382	28728408	25805210	25277592	0.989627	0.885462	0.925055	0.822344	0.0190282	0.0517866	0.00106921	0.00244858
SP_1558	SP_1558	15901401	hypothetical_protein	Cytoplasmic	124	14.4	4.45	22	95	2	High	0	18.62	300.65	9.95269e+07	27034981	6.82182e+07	4.49064e+07	61511876	66495191	6.23067e+07	1.01993e+08	7.54622e+07	3.86286e+07	5.91494e+07	5.08447e+07	71412392	63097496	73289416	68316800	62354596	60900420	82651296	55131192	74454432	49213184	52711540	47443584	0.921908	0.237629	0.350285	0.703781	0.0541512	0.111437	0.0273203	0.0399322
SP_1560	SP_1560	15901403	hypothetical protein	CytoplasmicMembrane	259	27.9	8.02	47	76	11	High	0	58.368	220.07	5.29819e+07	1.5684e+07	3.20166e+07	2.07128e+07	3.45414e+07	3.51268e+07	1.41084e+07	4.13138e+07	1.8818e+07	1.46655e+07	2.25802e+07	2.37298e+07	38472656	35716416	34284332	30920044	34963880	32244932	18273360	23006358	18559412	18491822	20281310	22199298	0.904635	0.111874	0.206401	1.01894	0.824037	0.876333	5.08283e-05	0.000201967
SP_1561	SP_1561	15901404	hypothetical protein	CytoplasmicMembrane	285	31.8	8.29	31	61	7	High	0	39.84	217.88	3.95784e+07	1.28172e+07	2.56919e+07	1.33355e+07	1.81974e+07	2.05511e+07	1.3054e+07	3.45735e+07	1.78815e+07	1.21225e+07	1.49365e+07	1.47286e+07	28896928	28825628	27510526	19658268	18435626	18973740	16957730	19388226	17671598	15180009	13406945	13794536	0.669548	8.14678e-05	0.00287853	0.784587	0.011322	0.0363853	1.40152e-06	1.25509e-05
SP_1563	SP_1563	15901406	pyridine nucleotide-disulfide oxidoreductase family protein	Cytoplasmic	321	35.1	5.63	42	46	9	High	0	39.09	163.19	2.37275e+07	8.93733e+06	1.72301e+07	1.07871e+07	1.52753e+07	1.63943e+07	1.40384e+07	2.81092e+07	1.91246e+07	1.36234e+07	1.94041e+07	2.10327e+07	17455024	19777578	18382246	15884115	15496027	15122118	18141720	15855643	18855346	17089578	17426626	19679454	0.836148	0.0102647	0.0379958	1.02541	0.725602	0.79545	0.0523288	0.0692332
SP_1564	SP_1564	15901407	hypothetical protein	Cytoplasmic	303	34	6.47	13	28	3	High	0	12.289	79.08	1.93727e+06	276032	672050	966327	1.93842e+06	2.20637e+06	540238	894326	1.15606e+06	1.44547e+06	1.82823e+06	1.76489e+06	1494688	513826	708958	1.34135e+06	1.96173e+06	2.05784e+06	664780	565944	1.14761e+06	1.76621e+06	1.66885e+06	1.66515e+06	1.97276	0.0900276	0.176128	2.14445	0.0195668	0.0528844	0.0296557	0.042568
SP_1565	SP_1565	15901408	hypothetical protein	Cytoplasmic	325	36	5.88	25	55	7	High	0	37.555	171.53	1.68805e+07	6.01057e+06	1.10223e+07	6.53252e+06	1.15862e+07	1.28251e+07	7.93484e+06	2.23842e+07	1.03893e+07	8.50722e+06	13266824	1.22197e+07	12522858	13036312	11735108	9489606	11746130	11816926	10184402	12735325	10271590	10624093	11975977	11456752	0.886266	0.186281	0.295113	1.02608	0.730091	0.798877	0.416465	0.448615
SP_1566	SP_1566	15901409	hypothetical protein	Cytoplasmic	296	33.7	5.6	56	222	16	High	0	120.758	768.46	1.75686e+08	4.90425e+07	1.2011e+08	7.04064e+07	1.02622e+08	1.11313e+08	7.38177e+07	1.68554e+08	9.1116e+07	6.2196e+07	7.97219e+07	8.06577e+07	125026488	117946440	129246200	108269432	104472720	101399272	98169856	89818600	89825304	79829784	70949104	75234104	0.843969	0.00667355	0.02919	0.813541	0.0101933	0.0343584	9.73846e-06	5.48645e-05
SP_1567	SP_1567	15901410	endoribonuclease L-Psp	Cytoplasmic	126	13.7	4.74	54	79	4	High	0	29.513	359.91	1.50974e+08	7.10359e+07	1.32328e+08	7.5655e+07	8.6955e+07	1.01239e+08	1.06086e+08	2.09232e+08	1.35092e+08	7.42684e+07	1.05338e+08	8.0664e+07	107563248	174074848	142224720	116622152	88232320	92306928	141809328	110292816	133071032	95595464	93306736	75234104	0.701079	0.104451	0.196266	0.68576	0.0244446	0.0637189	0.0328521	0.0467092
SP_1569	clpX	15901412	ATP-dependent protease ATP-binding subunit ClpX	Cytoplasmic	410	45.8	4.82	56	280	18	High	0	120.076	855.65	1.20838e+08	3.63393e+07	8.86437e+07	6.07703e+07	8.52353e+07	9.66951e+07	6.51485e+07	1.64909e+08	8.64202e+07	8.08308e+07	1.09103e+08	1.08848e+08	86537504	86085848	95311128	93179480	86405632	88395704	86425936	87762952	85194552	104079792	96838216	101499744	1.00017	0.985387	0.992387	1.16591	0.00256279	0.0139147	0.00682329	0.0117812
SP_1571	SP_1571	15901414	dihydrofolate reductase	Cytoplasmic	168	19.7	5.85	48	50	9	High	0	38.311	145.48	1.96592e+07	4.47127e+06	1.08076e+07	6.14865e+06	9.17321e+06	9.70021e+06	1.27631e+07	2.44946e+07	1.59185e+07	8.49421e+06	1.31459e+07	1.2616e+07	14557407	9554541	11520921	8924589	9283810	8967148	16563295	13887662	15698529	10598764	11797027	11830882	0.762654	0.104529	0.196266	0.741648	0.00939899	0.0324265	0.00470311	0.00843608
SP_1572	SP_1572	15901415	non-heme iron-containing ferritin	Cytoplasmic	172	19.2	4.67	80	412	15	High	0	140.055	1292.94	3.98026e+07	1.58972e+07	3.5083e+07	3.89497e+08	6.00273e+08	841626540	7.3354e+07	1.53057e+08	9.49929e+07	1.23599e+09	1.6852e+09	1.54395e+09	29040278	36194128	37619476	623112064	609404160	761598848	97629080	81585592	93667536	1659081472	1475355520	1419476480	19.3878	1.02113e-05	0.00137127	16.6882	2.51711e-06	0.000492095	4.21707e-10	4.21707e-08
SP_1573	lytC	118090031	lysozyme	Extracellular	490	57.3	6.93	37	119	17	High	0	82.381	339.75	2.89346e+07	7.45055e+06	1.70242e+07	1.01001e+07	1.5046e+07	1.75916e+07	1.98845e+07	5.15889e+07	2.56931e+07	2.03656e+07	2.77698e+07	3.23605e+07	21208896	16332933	18167612	14830895	15191931	16223018	25930376	28531158	25365084	25779384	24914788	30311834	0.830126	0.0875003	0.171471	1.01477	0.870227	0.913544	0.000161253	0.000489883
SP_1574	tpiA	15901416	triosephosphate isomerase (EC:5.3.1.1)	Cytoplasmic	252	26.5	4.84	70	385	15	High	0	147.996	1684.65	8.76059e+08	2.51867e+08	6.05991e+08	4.09686e+08	5.6861e+08	6.41147e+08	5.42028e+08	1.07903e+09	6.78047e+08	3.72592e+08	5.48215e+08	5.50877e+08	604559168	657914688	656924352	657573824	577896896	580565440	743976384	539543040	667484160	490794688	481854240	509891264	0.946149	0.328349	0.44057	0.759886	0.0499541	0.104823	0.0270023	0.0395155
SP_1575	SP_1575	15901417	hypothetical protein	Cytoplasmic	225	25.6	4.75	27	28	5	High	0	19.099	68.19	2.73224e+06	1.05032e+06	1.73367e+06	1.10897e+06	1.03298e+06	1.37569e+06	1.61506e+06	3.55493e+06	2.58406e+06	1.63334e+06	1.36198e+06	1.90588e+06	2.09045e+06	2.08873e+06	1.83204e+06	1.54641e+06	1.04103e+06	1.28794e+06	2.02915e+06	2.14626e+06	2550875	1.9887e+06	1.24259e+06	1.8065e+06	0.644692	0.0212968	0.06208	0.748971	0.128764	0.207189	0.0193242	0.0295778
SP_1576	SP_1576	15901418	homoserine O-succinyltransferase (EC:2.3.1.46)	Cytoplasmic	314	36.9	5.17	12	7	3	High	0	10.883	13.9	935460	236029	646378	627445	771226	1.28311e+06	320589	1.01339e+06	411483	496740	1.01034e+06	913926	729912	435960	681422	861710	779084	1.19505e+06	391950	636781	406935	596438	924566	866927	1.53514	0.10265	0.193819	1.66329	0.0674315	0.13167	0.0450544	0.0614378
SP_1577	SP_1577	15901419	adenine phosphoribosyltransferase (EC:2.4.2.7)	Cytoplasmic	170	18.7	5.02	69	206	17	High	0	94.959	660.45	1.30816e+08	4.33731e+07	8.92994e+07	6.4441e+07	8.50072e+07	9.54817e+07	6.5666e+07	1.52427e+08	8.57081e+07	6.05508e+07	9.08406e+07	8.37278e+07	93555704	103839632	96067048	98832056	86202560	87304224	87234952	81069920	84504976	77748200	80762880	78019784	0.92802	0.231577	0.344851	0.935608	0.0535243	0.110535	0.00458643	0.00832634
SP_1578	SP_1578	15901420	hypothetical protein	Cytoplasmic	252	27.9	9.38	55	89	13	High	0	80.957	276.86	1.82878e+08	5.70226e+07	1.14693e+08	1.23079e+07	2.04368e+07	1.66432e+07	6.63994e+07	1.78855e+08	9.00113e+07	5.3522e+06	1.0321e+07	7.45523e+06	129907464	138235712	123839792	18146340	20665918	15305645	88179248	94951192	88741504	6636112	9289795	7018801	0.138062	2.79022e-05	0.00179235	0.0843953	2.02256e-05	0.0013807	6.95062e-09	2.74642e-07
SP_1580	SP_1580	15901422	sugar ABC transporter ATP-binding protein	CytoplasmicMembrane	376	41.8	6.16	43	294	18	High	0	124.639	962.22	2.09903e+08	7.35931e+07	1.40551e+08	1.04567e+08	1.53781e+08	1.6429e+08	1.40565e+08	3.19957e+08	1.83645e+08	1.42806e+08	1.87306e+08	1.98407e+08	148705184	180772176	151961680	163026544	156249984	149530016	189481952	166486240	181327184	185668320	165562400	183951280	0.973761	0.744033	0.816126	0.996067	0.945522	0.964433	0.109103	0.133324
SP_1583	SP_1583	15901425	isochorismatase	Cytoplasmic	191	21.4	5.26	44	104	8	High	0	48.239	283.77	1.23555e+08	2.95845e+07	8.01239e+07	4.77307e+07	6.72945e+07	7.73474e+07	6.20814e+07	1.53492e+08	7.79656e+07	3.33622e+07	5.75757e+07	5.83874e+07	88644024	69489688	86132744	72681672	68239880	70739008	82381944	81585592	76917632	42497804	51382128	54512124	0.866515	0.155718	0.260499	0.616028	0.00330644	0.0159818	0.000689578	0.0016583
SP_1584	codY	15901426	transcriptional repressor CodY	Cytoplasmic	262	29.8	5.99	62	320	20	High	0	122.011	1067.71	1.78794e+08	5.42536e+07	1.1775e+08	9.87148e+07	1.47471e+08	1.64375e+08	8.77943e+07	2.16418e+08	1.13976e+08	1.05185e+08	1.40025e+08	1.51565e+08	127118832	131371368	127083664	153018816	149142736	149530016	117112832	113861880	112385600	135745888	124180192	141359440	1.17148	0.0003207	0.00490881	1.1687	0.0183031	0.0505166	0.000128599	0.000405035
SP_1586	cshA	15901428	ATP-dependent RNA helicase	CytoplasmicMembrane	524	58.8	9.57	56	482	29	High	0	219.905	1654.35	2.47206e+08	7.55871e+07	1.73712e+08	1.58844e+08	2.32882e+08	2.57272e+08	1.55612e+08	3.58243e+08	2.09992e+08	2.32804e+08	2.89771e+08	2.80084e+08	174395472	185931472	187684720	249321104	236479552	233811552	209973984	185560304	206928688	304582912	256035072	259786496	1.31313	0.000856278	0.0082289	1.36175	0.0106432	0.0349706	0.000263464	0.000726798
SP_1587	SP_1587	15901429	oxalate:formate antiporter	CytoplasmicMembrane	408	44.2	9.19	4	14	1	High	0	13.727	55.85	1.53219e+07	5.36867e+06	9.40294e+06	2.79127e+06	4.18301e+06	4.75775e+06	3.28538e+06	6.0286e+06	4.44019e+06	1.89769e+06	2.33282e+06	3.01806e+06	11357596	11583198	10021906	3.97321e+06	4229327	4.4157e+06	4.16716e+06	3581746	4.38804e+06	2.32307e+06	2.12154e+06	2851312	0.382803	6.22459e-05	0.00244438	0.601133	0.00855843	0.0306068	7.34624e-07	8.01408e-06
SP_1588	SP_1588	15901430	pyridine nucleotide-disulfide oxidoreductase	Cytoplasmic	438	47.1	5	71	286	24	High	0	167.514	1082.86	3.82187e+08	1.25503e+08	2.65652e+08	1.3382e+08	1.5905e+08	1.8481e+08	1.55566e+08	2.88986e+08	1.96199e+08	1.10323e+08	1.48258e+08	1.4054e+08	267602544	317838720	287406176	209265120	161327136	168578384	209973984	150869760	193143920	142301888	131229224	131167280	0.617715	0.00681942	0.0295593	0.730519	0.0412871	0.0912048	0.000401689	0.00103885
SP_1589	SP_1589	15901431	hypothetical protein	Cytoplasmic	447	49.6	6.55	28	96	10	High	0	48.413	340.5	5.52907e+07	1.62991e+07	3.76423e+07	2.88896e+07	3.78403e+07	4.26084e+07	2.99987e+07	7.37622e+07	3.97318e+07	3.3728e+07	4.86274e+07	4.67026e+07	40111520	37150436	40309928	43513088	38310872	39097952	39344664	40322056	39169580	42884784	43400864	43628764	1.02849	0.597531	0.696391	1.09322	0.000998044	0.00807383	0.0712334	0.0908396
SP_1590	SP_1590	15901432	conserved_hypothetical_protein	Unknown	260	29.2	4.94	46	56	7	High	0	37.626	160.32	1.241e+07	2.98925e+06	8.58031e+06	5.75132e+06	5.35466e+06	6.25744e+06	7.17812e+06	1.32329e+07	9.30006e+06	9.16897e+06	1.08048e+07	1.15733e+07	9239757	6.26484e+06	9144304	8.3308e+06	5414165	5799430	9206775	7.63835e+06	9185954	11459948	9737804	10895441	0.792911	0.272822	0.385588	1.23288	0.0547016	0.112373	0.041405	0.057066
SP_1591	pepQ	15901433	proline dipeptidase	Cytoplasmic	360	40.2	4.91	39	204	13	High	0	86.947	721.48	1.52264e+08	4.31955e+07	9.84957e+07	6.1966e+07	8.89493e+07	1.10779e+08	6.43182e+07	1.74628e+08	9.01949e+07	6.77109e+07	9.64098e+07	8.39656e+07	108262768	103337600	106005792	95062704	90160856	101399272	85347064	92899480	88938448	86991240	85710952	78298168	0.902447	0.0470511	0.106527	0.939425	0.199541	0.297788	0.00166079	0.00354832
SP_1598	SP_1598	15901438	phosphomethylpyrimidine kinase (EC:2.7.4.7)	Unknown	257	27.7	5.2	27	50	5	High	0	24.01	135.84	4.38437e+07	1.06274e+07	2.51197e+07	1.36465e+07	1.69351e+07	1.85959e+07	1.82908e+07	4.68795e+07	2.25354e+07	1.01385e+07	1.75595e+07	16189725	31903796	23648864	26865766	20112314	17117822	17140164	23814034	26015158	22208976	12639138	15819544	15196418	0.659686	0.015662	0.0514419	0.606	0.00371122	0.0172748	0.000566713	0.00139071
SP_1599	truA	15901439	tRNA pseudouridine synthase A (EC:5.4.99.12)	Cytoplasmic	249	28.4	7.02	12	6	3	High	0.002	8.689	7.93	1.00776e+06	390298	881309	636284	974126	1.07631e+06	786332	1.76411e+06	1.0547e+06	780529	942716	998678	787366	738620	930458	874377	984390	1.00916e+06	973361	1.08926e+06	1038865	943169	863612	947224	1.16751	0.126092	0.227591	0.887962	0.0556158	0.114051	0.0395522	0.0549336
SP_1601	SP_1601	15901441	hypothetical protein	CytoplasmicMembrane	209	24.6	9.61	9	24	2	High	0.002	8.292	44.59	1.34828e+07	2.45082e+06	7096387	4.12863e+06	7.44425e+06	8.59229e+06	4.44533e+06	1.62285e+07	7.26932e+06	3.83882e+06	7.22845e+06	1.25859e+07	10044037	5082932	7561264	5.93671e+06	7.53115e+06	7945735	5663304	9310483	7182215	4.74119e+06	6535668	11830882	0.943819	0.904568	0.937777	1.04296	0.973289	0.980814	0.999582	0.999582
SP_1602	SP_1602	15901442	phnA protein	Unknown	112	12.3	5.3	23	31	3	High	0.002	7.581	46.99	1.01886e+07	1.98289e+06	5.138e+06	3.8903e+06	6.67693e+06	6.74668e+06	4.64239e+06	1.30969e+07	8.10827e+06	4.45504e+06	7.3205e+06	7.95371e+06	7.62723e+06	4.06466e+06	5.46689e+06	5.58375e+06	6.76127e+06	6251082	5909006	7582397	8011401	5518164	6.6165e+06	7477984	1.08377	0.592686	0.693848	0.912097	0.517677	0.624727	0.516654	0.544802
SP_1603	cmk	15901443	cytidylate kinase (EC:2.7.4.14)	Cytoplasmic	223	24.6	5.17	59	137	11	High	0	59.984	487.5	8.79438e+07	2.62128e+07	5.64616e+07	4.52807e+07	6.90751e+07	7.10749e+07	5.62337e+07	1.51191e+08	8.19982e+07	6.05313e+07	7.28158e+07	7.82344e+07	63227872	61136712	60670768	68939792	70066280	65091924	74438000	80554232	80859416	77617952	64844188	72911944	1.10302	0.0190402	0.0584232	0.913176	0.191857	0.287418	0.00467754	0.00840277
SP_1604	SP_1604	15901444	hypothetical_protein	Cytoplasmic	158	16.8	5.14	8	11	1	High	0.005	4.536	40.18	15032804	5820952	11771586	9482063	14986797	16098836	10549698	29854098	14618945	13419250	20439874	20775122	11138882	12604092	12592085	13899485	15191931	14846846	13544798	16836362	14415974	16834828	18319020	19492686	1.20925	0.0174994	0.0552962	1.21987	0.0600539	0.120416	0.00179879	0.00379357
SP_1606	SP_1606	15901446	glycosyl transferase family protein	CytoplasmicMembrane	321	36.5	5.86	15	9	4	High	0	12.795	10.95	2743108	650934	1.98585e+06	1.54212e+06	1.73249e+06	2.0656e+06	2.33923e+06	1.7024e+06	3.24734e+06	1.17673e+06	1.69575e+06	2.5458e+06	2.09797e+06	1.26466e+06	2108558	2.16227e+06	1.74923e+06	1.92809e+06	2948021	1.05335e+06	3212743	1.43322e+06	1.55103e+06	2409130	1.06733	0.649733	0.736237	0.747615	0.625633	0.721601	0.896488	0.910141
SP_1607	galE-1	15901447	UDP-glucose 4-epimerase	Cytoplasmic	339	37.4	4.93	68	369	19	High	0	166.941	1585.61	7.33881e+08	2.46323e+08	4.94151e+08	2.85811e+08	3.99802e+08	4.80415e+08	3.64743e+08	7.71999e+08	4.99376e+08	2.87869e+08	3.7448e+08	3.77678e+08	508176576	641483008	535074848	454778272	406143744	435359776	497906016	390018688	491373760	377590976	329660832	350307040	0.769428	0.02961	0.0801049	0.766737	0.04196	0.0922615	0.00390962	0.00727372
SP_1608	SP_1608	15901448	oxidoreductase, DadA family protein	Cytoplasmic	367	40.6	4.81	10	11	3	High	0	15.728	28.91	3.97397e+06	2.08949e+06	3.6388e+06	3.39561e+06	3.69291e+06	4.22662e+06	2.10669e+06	4.52636e+06	2.75736e+06	2.34484e+06	3.62253e+06	3.40179e+06	3.01952e+06	4301999	3.86616e+06	4864764	3.73319e+06	3.9263e+06	2.65393e+06	2.71656e+06	2.7287e+06	2.86934e+06	3.28685e+06	3208615	1.11947	0.427906	0.541735	1.15626	0.0283204	0.0697297	0.0110771	0.0180359
SP_1609	SP_1609	15901449	hypothetical protein	Cytoplasmic	265	29.8	4.86	31	23	6	High	0	22.118	57.32	4.11174e+06	3.57622e+06	2.9404e+06	1.8708e+06	2.51744e+06	2.57081e+06	1.0893e+06	3.95128e+06	2.24244e+06	1.56355e+06	1941694	2.37409e+06	3.12405e+06	7.56837e+06	3.12001e+06	2.63779e+06	2.54874e+06	2.39129e+06	1.3568e+06	2379600	2.21495e+06	1.90213e+06	1768501	2239709	0.548624	0.161968	0.269023	0.99311	0.931423	0.9542	0.0453354	0.061609
SP_1610	SP_1610	15901450	hypothetical protein	Cytoplasmic	225	24.9	5.25	30	46	6	High	0	25.313	147.81	1.63774e+07	5.01628e+06	1.11333e+07	7.46477e+06	1.07295e+07	1.16668e+07	6.79048e+06	1.35752e+07	8.79188e+06	6.22976e+06	1.04562e+07	1.10215e+07	12158937	10792097	11842240	10875541	10834078	10806148	8699010	7.86197e+06	8682588	7744030	9469019	10333976	0.934542	0.140587	0.242852	1.09125	0.425621	0.534532	0.00585497	0.0102869
SP_1612	SP_1612	15901452	hypothetical protein	Cytoplasmic	330	38.9	8.66	4	3	1	High	0.006	4.175	0	1.05677e+06		835249	607502	930730	1095726	747434	1.25411e+06		666258	1.27627e+06	1.24053e+06	825624	na	881685	834986	940898	1.02776e+06	924324	782508	na	802512	1.16995e+06	1.17476e+06	1.09476	0.361625	0.474062	1.22926	0.346022	0.454517	0.470715	0.500317
SP_1615	recP-1	118090030	transketolase (EC:2.2.1.1)	Unknown	655	70.8	5.33	11	66	1	High	0	32.032	197.06							123907	356540		219607	541699	562889	na	na	na	na	na	na	149156	233027	na	261042	498131	535003	na	na	na	2.25751	0.10135	0.1733	0.10135	0.125511
SP_1617	SP_1617	15901454	PTS system transporter subunit IIC	CytoplasmicMembrane	361	36.9	8.34	3	5	1	High	0.007	4.119	9.01							333907	936496	486253	444177	507267	802781	na	na	na	na	na	na	408080	591625	481131	531998	466162	762025	na	na	na	1.18864	0.422991	0.53237	0.422994	0.454018
SP_1619	SP_1619	15901456	PTS system transporter subunit IIA	CytoplasmicMembrane	149	16.3	4.79	13	5	1	High	0.002	5.04	18.09							316812	1.14176e+06	466778	521439	664350	433274	na	na	na	na	na	na	386990	715845	462335	625651	609465	411883	na	na	na	1.05228	0.779767	0.843788	0.779765	0.800443
SP_1623	SP_1623	15901459	cation transporter E1-E2 family ATPase	CytoplasmicMembrane	778	85.5	5.95	30	135	18	High	0	95.007	381.07	3.12992e+07	1.58183e+07	2.3424e+07	2.61235e+07	3.55848e+07	3.42758e+07	2.29344e+07	5.36249e+07	3.50981e+07	3.08545e+07	4.28929e+07	4.1935e+07	22937200	35955248	25039154	39202064	36079420	31513492	29905522	29599500	34634224	39274184	38341212	39160720	1.2724	0.1659	0.27322	1.24046	0.0131525	0.0407265	0.0650779	0.0839715
SP_1624	SP_1624	15901460	acyltransferase	CytoplasmicMembrane	249	28.9	9.57	51	128	15	High	0	72.077	373.39	5.87035e+07	1.79956e+07	3.63504e+07	20160353	2.97935e+07	3.3097e+07	2.4304e+07	5.63601e+07	3.02925e+07	2.3036e+07	2.67885e+07	3.13919e+07	42531972	41227424	39018532	30155650	30197264	30416350	31763498	31092816	29901354	29113418	24024182	29379782	0.739296	0.000286378	0.00463773	0.889602	0.149918	0.234785	0.000297038	0.000804618
SP_1625	SP_1625	15901461	cadmium resistance transporter	CytoplasmicMembrane	204	22.8	4.28	9	18	1	High	0	10.189	55.86	916890	397885	723014	410062	733088	856517	725621	1.44001e+06	975351	885842	610444	921900	716110	754532	762985	557806	740658	801695	897936	897204	964716	1.07185e+06	560204	874485	0.940246	0.549698	0.657834	0.908213	0.535572	0.641702	0.372705	0.405849
SP_1626	rpsO	15901462	3S ribosomal protein S15	Cytoplasmic	89	10.5	10.18	37	322	10	High	0	56.55	872.68	4.61477e+08	1.33699e+08	2.82814e+08	2.74821e+08	4.38518e+08	4.63743e+08	2.74338e+08	7.53869e+08	3.80964e+08	3.53901e+08	592309648	5.61244e+08	321853344	339053088	305849632	436880576	445772896	420918432	372086080	381225120	375255008	465456512	520286784	519109056	1.3484	0.000933718	0.00855773	1.33342	0.00156631	0.0102071	1.02304e-05	5.60569e-05
SP_1631	thrs	15901467	threonyl-tRNA synthetase (EC:6.1.1.3)	Cytoplasmic	647	74.7	5.4	63	371	37	High	0	230.963	1204.47	1.75488e+08	6.32725e+07	1.23809e+08	1.10479e+08	1.58063e+08	1.81235e+08	1.70161e+08	3.46508e+08	2.02045e+08	2.02006e+08	2.58764e+08	2.4754e+08	124328896	154315248	133571656	170979296	160311488	164950928	229127840	180047184	199051504	263535040	228831168	230205088	1.20384	0.0460183	0.105405	1.188	0.104831	0.177955	0.000386464	0.00100817
SP_1632	hk1	15901468	sensor histidine kinase	CytoplasmicMembrane	324	38.1	5.8	11	11	3	High	0	11.111	23.11	1.78183e+06	567005	1.17821e+06	884024	1.40857e+06	1.63221e+06	585793	2.14073e+06	997738	709946	1.11928e+06	637337	1.37354e+06	1.09396e+06	1.24769e+06	1.2249e+06	1.42545e+06	1520034	722339	1.31584e+06	987455	856290	1.02458e+06	605035	1.12252	0.275964	0.387912	0.821616	0.459135	0.56504	0.0625721	0.0813506
SP_1633	rr1	15901469	DNA-binding response regulator	Cytoplasmic	225	25.9	5.47	20	24	4	High	0	18.339	53.79	3.97135e+06	907801	2.3937e+06	899936	1.60711e+06	1.76815e+06	2.1093e+06	5.57036e+06	3.51331e+06	1.92865e+06	3.01285e+06	3.39062e+06	3.01952e+06	1.79328e+06	2.53424e+06	1.2476e+06	1.6278e+06	1.64992e+06	2.65393e+06	3.31728e+06	3469554	2.36026e+06	2.73622e+06	3199219	0.615938	0.0576463	0.123785	0.87871	0.341158	0.451159	0.00624755	0.0108969
SP_1634	SP_1634	15901470	hypothetical protein	Cytoplasmic	357	41	5.87	12	8	4	High	0	13.715	14.79	727488	158004	335498	115247	123904	124522	398835	756939	465390	159279	196719	268271	570113	286119	352443	151791	125124	118038	488863	481883	460357	187812	182230	255402	0.326765	0.00768023	0.0314215	0.437036	0.0015489	0.0101592	0.000253851	0.000710073
SP_1636	SP_1636	15901472	Rrf2 family protein	Cytoplasmic	145	15.8	5.82	54	48	8	High	0	35.232	140.96	1.86545e+07	6.00482e+06	1.32396e+07	8.7893e+06	1.23933e+07	1.32991e+07	8837495	1.94366e+07	1.21085e+07	7.65544e+06	9.41034e+06	1.0208e+07	13831435	13013545	14092414	12864619	12556838	12276232	11372545	11082754	11949196	9548941	8491989	9585201	0.920862	0.0409581	0.0975743	0.80298	0.00834564	0.0299371	3.37568e-05	0.000141637
SP_1637	SP_1637	15901473	hypothetical protein	Cytoplasmic	280	32.4	5.5	18	20	4	High	0	16.967	44.38	8.10619e+06	3.03079e+06	6.29687e+06	3.49263e+06	4.17402e+06	4.94341e+06	4.51377e+06	9.10796e+06	5.60651e+06	3.64627e+06	4.33042e+06	3.96887e+06	6.08949e+06	6.35284e+06	6.70609e+06	4.99665e+06	4219202	4581849	5.74088e+06	5.33725e+06	5543365	4.50343e+06	3.92702e+06	3.74429e+06	0.720566	0.00424464	0.021333	0.73247	0.00607104	0.0248995	0.000226942	0.000653069
SP_1638	dtxR	15901474	iron-dependent transcriptional regulator	Cytoplasmic	216	24.8	5.87	18	50	5	High	0	22.698	133.73	7.45706e+06	1.98882e+06	3.4924e+06	2.24779e+06	4.15835e+06	3.6405e+06	3.26734e+06	9776727	4.73797e+06	2.81409e+06	4.14834e+06	5.03234e+06	5609871	4.08621e+06	3.70622e+06	3.18782e+06	4209069	3.38114e+06	4.14143e+06	5716223	4.6843e+06	3.45443e+06	3.76479e+06	4.73971e+06	0.804192	0.238328	0.350872	0.822375	0.215497	0.3144	0.253837	0.28521
SP_1644	SP_1644	15901480	D-tyrosyl-tRNA(Tyr) deacylase	Unknown	147	16.2	5.36	14	18	3	High	0	15.32	56.02	4.38286e+06	1.13314e+06	2.706e+06	1.96632e+06	3.14994e+06	3.15806e+06	2.91525e+06	4.81127e+06	2.73115e+06	2.50629e+06	3.00844e+06	3.00284e+06	3.32547e+06	2.25608e+06	2.87499e+06	2782298	3.18648e+06	2937301	3.69158e+06	2.87871e+06	2.69907e+06	3080791	2.73622e+06	2.83249e+06	1.05316	0.627928	0.717808	0.933129	0.580425	0.68152	0.848095	0.863934
SP_1645	SP_1645	15901481	GTP pyrophosphokinase	Cytoplasmic	740	84.6	7.81	42	256	32	High	0	161.053	736.82	9.34467e+07	2.69915e+07	5.87398e+07	4.24532e+07	7.19259e+07	8.10819e+07	5.22254e+07	1.25833e+08	5.12511e+07	4.76722e+07	8.06385e+07	8.25299e+07	67110552	63097496	63042720	64580304	72907864	74199080	69059416	67624768	50604520	60994440	71745144	76905304	1.0954	0.136998	0.239131	1.11937	0.387357	0.494956	0.478524	0.508167
SP_1646	SP_1646	15901482	metallo-beta-lactamase superfamily protein	Cytoplasmic	209	23.6	5.76	15	13	2	High	0	10.278	42.52	1.5365e+06	263074	763962	218609	432075	388973	556500	1.16308e+06	792608	240302	280204	398267	1.19145e+06	488455	806429	293532	436335	365303	686042	727980	784760	285117	258426	378714	0.440476	0.0528982	0.116331	0.41944	0.00189276	0.0116241	0.0046282	0.00837683
SP_1647	pepO	15901483	endopeptidase O	Cytoplasmic	630	71.9	4.83	80	742	52	High	0	369.232	2723.89	1.14879e+09	3.96492e+08	8.22036e+08	5.01861e+08	6.71934e+08	7.78233e+08	7.26466e+08	1.52772e+09	9.14034e+08	5.29245e+08	7.19867e+08	7.13737e+08	789775872	1057310016	892161088	809021248	682594368	703982464	1001138112	755523904	899615104	699450624	631989312	660070848	0.801533	0.094717	0.183455	0.749738	0.031698	0.0748123	0.0286415	0.0413595
SP_1648	psaB	15901484	manganese ABC transporter ATP-binding protein	CytoplasmicMembrane	240	26.8	7.56	67	139	17	High	0	104.797	449.32	5.87981e+06	1.89126e+06	4.34531e+06	6.94309e+07	9.57804e+07	1.06968e+08	3.24452e+06	9.41286e+06	4.7025e+06	7.98173e+07	1.00339e+08	1.01804e+08	4.44071e+06	3.87096e+06	4623551	106695192	97164440	97762840	4102842	5507045	4644804	102773664	88891096	95005632	23.3179	8.78602e-07	0.000341483	20.1106	5.95691e-06	0.000708282	1.30748e-10	2.33303e-08
SP_1650	psaA	15901485	manganese ABC transporter manganese-binding adhesion liprotein	CytoplasmicMembrane	309	34.6	5.53	76	262	26	High	0	222.421	958.68	1.7463e+07	6.02703e+06	1.2494e+07	3.50023e+08	4.59686e+08	5.61225e+08	8.46462e+06	2.23469e+07	9.42433e+06	2.96284e+08	3.72012e+08	3.41294e+08	12959334	13081850	13342142	559231936	467114240	508438880	10876174	12680365	9304392	388227712	327910016	316142368	38.9704	2.57327e-07	0.000150022	31.4136	6.03821e-06	0.000708282	7.03143e-11	2.10943e-08
SP_1651	tpx	255964977	thiol peroxidase	Unknown	163	18	4.93	47	130	10	High	0	57.518	485.62	2.44687e+08	5.62892e+07	1.45569e+08	2.43365e+07	3.78141e+07	3.99753e+07	1.70748e+08	3.4405e+08	2.07496e+08	3.70758e+07	4.8027e+07	4.55557e+07	173008576	136454496	157372544	36436312	38310872	36722912	230496944	178541632	203975024	47274540	42868404	42604884	0.238778	3.55302e-05	0.00185931	0.21655	4.69812e-05	0.00209571	2.7189e-08	7.76829e-07
SP_1653	SP_1653	15901488	ABC transporter ATP-binding protein	CytoplasmicMembrane	233	25.6	5.1	13	6	2	High	0.003	7.026	9.34	426540	130903	252437	147211	129659	118503	837977	1.77864e+06	1.03595e+06	600891	684052	552292	338078	235031	264820	195166	131183	112399	1.0388e+06	1101228	1.02898e+06	723154	627704	524589	0.52361	0.0277408	0.075929	0.591808	0.00502126	0.0216658	5.62279e-06	3.68708e-05
SP_1654	SP_1654	15901489	hypothetical protein	Cytoplasmic	803	91.4	5.26	6	9	4	High	0	13.527	14.98	3.2566e+06	416438	1.30395e+06	660277	833310	932326	356141		326623			459867	2.48832e+06	790387	1.37511e+06	908173	841784	871498	435396	na	323823	na	na	437465	0.563291	0.232104	0.344939	1.15241	na	na	0.0325214	0.0462938
SP_1655	gpmA	15901490	phosphoglyceromutase	Cytoplasmic	230	26	5.31	85	885	25	High	0	232.079	3315.49	1.3621e+09	4.66926e+08	9.3615e+08	6.94613e+08	9.44931e+08	1.17736e+09	8.00926e+08	1.90364e+09	1.08439e+09	9.20028e+08	1.15004e+09	1.0335e+09	931177088	1257119872	1016416000	1128768000	960145408	1065568128	1106275456	931475712	1062861952	1225835776	1006410560	950860928	0.984326	0.926232	0.949867	1.02661	0.817501	0.872547	0.9921	0.993756
SP_1661	divIVA	15901496	cell division protein DivIVA	Cytoplasmic	262	30.1	4.72	40	223	17	High	0	110.642	775.21	2.20632e+08	6.93838e+07	1.54065e+08	1.47114e+08	1.97539e+08	2.11574e+08	1.41501e+08	3.19217e+08	1.72304e+08	1.34287e+08	1.97657e+08	1.80401e+08	156350560	169959984	166030608	230074192	200931552	193052336	190847872	165983568	169510480	173826176	175237312	167290640	1.26753	0.0160464	0.0521173	0.981024	0.722299	0.795091	0.0100654	0.0165913
SP_1662	SP_1662	15901497	hypothetical protein	Cytoplasmic	261	30.4	8.68	12	8	3	High	0	11.957	19.98	829975	274746	732212	888017	1.50104e+06	1.58612e+06	277807	821869	439697	1.06693e+06	1.41505e+06	1.21611e+06	649335	511872	772520	1.23057e+06	1.5165e+06	1.48291e+06	338678	521824	435625	1.29785e+06	1.29706e+06	1155883	2.18748	0.00437209	0.021693	2.89384	0.00119959	0.0088809	5.53908e-05	0.000216511
SP_1664	sepF	15901499	ylmF_protein	Cytoplasmic	179	20.6	4.93	49	90	10	High	0	63.095	244.77	1.93498e+07	4.56949e+06	1.17779e+07	8.15316e+06	1.36143e+07	1.46106e+07	8.23509e+06	2.18326e+07	1.12134e+07	7.67169e+06	1.11986e+07	1.2539e+07	14267109	9779032	12592085	11906529	13772985	13470037	10588912	12405441	11061091	9561572	10096124	11737376	1.06854	0.559223	0.665361	0.921881	0.344433	0.452937	0.233923	0.264819
SP_1665	SP_1665	15901500	hypothetical protein	Cytoplasmic	223	25.6	6.32	51	98	10	High	0	45.914	274.52	3.19635e+07	9.73095e+06	2.14156e+07	2.31554e+07	3.31001e+07	3.51614e+07	1.78729e+07	4.21594e+07	2.19729e+07	2.58166e+07	3.72491e+07	3.31012e+07	23440866	21615864	22890806	34748532	33543954	32336368	23285392	23490798	21715822	32709916	33277194	30964174	1.48098	0.00024621	0.00410116	1.41551	0.000459824	0.00545177	1.86012e-06	1.58308e-05
SP_1666	ftsZ	15901501	cell division protein FtsZ	Unknown	419	44.4	4.81	72	777	31	High	0	297.242	3047.95	1.32972e+09	4.7816e+08	9.10406e+08	6.53953e+08	8.76195e+08	9.51694e+08	7.48644e+08	1561270997	9.42329e+08	7.16142e+08	9.71654e+08	9.16129e+08	911002112	1288217472	988068864	1060642368	889989120	860580608	1033369216	769837888	927151488	950695936	851551808	846001280	0.882007	0.389667	0.503068	0.969927	0.805542	0.862869	0.437808	0.46741
SP_1667	ftsA	15901502	cell division protein FtsA	Cytoplasmic	457	49.4	5.19	83	349	32	High	0	216.206	1337.66	4.15843e+08	1.24849e+08	2.76783e+08	1.7708e+08	2.38818e+08	2.79475e+08	2.01146e+08	5.28884e+08	2.89876e+08	1.88088e+08	2.60487e+08	2.66978e+08	290972480	315192032	299341344	278255456	242573760	253724096	271626048	270645440	285687744	245025168	229709712	247769984	0.855382	0.0280569	0.0764353	0.872633	0.00965783	0.0329321	0.00233437	0.00467654
SP_1669	SP_1669	15901504	MutT/nudix family protein	Cytoplasmic	203	23.5	4.7	10	1	1	High	0.007	3.96	2.69	192575	38943	76236.9	76865.4	170808	267714					54470.6		155009	65711.8	79695.5	100533	172593	252132	na	na	na	na	50829.8	na	1.74843	0.206206	0.313987	na	na	na	0.206205	0.235795
SP_1670	murF	15901505	UDP-N-acetylmuramoylalanyl-D-glutamyl-2,6-diaminopimelate--D-alanyl-D-alanyl ligase	Cytoplasmic	457	50.4	4.94	38	139	15	High	0	86.475	485.6	3.59355e+07	1.1218e+07	2.45581e+07	1.5735e+07	2.41751e+07	2.8585e+07	1.70775e+07	4.63939e+07	2.33861e+07	2.03546e+07	2.67857e+07	2.781e+07	26243260	25055930	26328370	23297462	24518638	26299970	22228688	25747108	23096688	25779384	24024182	26023642	0.954765	0.287992	0.398337	1.0669	0.262586	0.366683	0.300149	0.331047
SP_1671	ddl	15901506	D-alanyl-alanine synthetase A (EC:6.3.2.4)	Cytoplasmic	347	38.7	4.88	67	261	21	High	0	142.961	887.43	1.59988e+08	4.89153e+07	1.1112e+08	8.35913e+07	1.04566e+08	1.29509e+08	1.00955e+08	2.27547e+08	1.19557e+08	9.47622e+07	1.10786e+08	1.04743e+08	113855384	117693664	119515184	129097280	106503008	118664752	135016944	119970872	118296088	122384816	98603256	97788928	1.00912	0.919378	0.949213	0.85398	0.128636	0.207189	0.235815	0.266709
SP_1672	recR	15901507	recombination protein RecR	Cytoplasmic	198	21.7	4.96	36	31	5	High	0	24.261	75.7	8.56717e+06	3.54689e+06	6.9412e+06	4.54477e+06	6.92783e+06	7.1824e+06	5.86371e+06	1.31576e+07	7.02527e+06	5.0455e+06	7.89736e+06	6.3922e+06	6.4285e+06	7501808	7.39021e+06	6.54079e+06	7014502	6.64729e+06	7490154	7.63835e+06	6945285	6258959	7137273	6015670	0.947566	0.386771	0.501083	0.87941	0.0925918	0.162261	0.183806	0.212288
SP_1673	penA	15901508	penicillin-binding protein 2B	CytoplasmicMembrane	680	73.8	5.22	31	99	17	High	0	83.926	266.96	2.34951e+07	7.55073e+06	1.66148e+07	1.59141e+07	2.66178e+07	2.91145e+07	1.38031e+07	3.23787e+07	1.8667e+07	2.07882e+07	2.90448e+07	3.33134e+07	17310376	16563095	17738450	23601344	26952244	26757522	17878526	18195300	18460784	26291944	25983186	31150564	1.49793	0.0010647	0.00894759	1.52978	0.00206849	0.0120714	3.59435e-05	0.000149246
SP_1674	SP_1674	15901509	phosphosugar-binding transcriptional regulator	Cytoplasmic	283	32.7	6.16	57	130	11	High	0	70.424	472.63	7.12641e+07	1.79549e+07	4.64351e+07	2.38443e+07	3.40432e+07	3.9565e+07	2.09638e+07	4.90601e+07	2.93673e+07	1.57752e+07	2.3298e+07	2.22134e+07	51480780	41227424	49786120	35668920	34456680	36357464	27386902	27193936	29013858	19895514	20905406	20799494	0.747279	0.0155207	0.0512668	0.736894	0.000294812	0.00436583	1.79186e-06	1.54693e-05
SP_1676	SP_1676	15901511	N-acetylneuraminate lyase	Cytoplasmic	305	33.4	5.2	47	77	11	High	0	55.188	242.26	3.7983e+07	1.26863e+07	2.51693e+07	1.4085e+07	2.05314e+07	2.29939e+07	2.43701e+07	9.13687e+07	2.56188e+07	1.54142e+07	1.97256e+07	2.17708e+07	27749944	28589264	26973144	20869722	20767274	21172856	31896300	49582916	25266410	19384968	17694352	20426144	0.753908	9.19251e-05	0.00297735	0.538715	0.0453859	0.0973267	0.0133063	0.0212053
SP_1680	SP_1680	15901515	conserved_hypothetical_protein	Cytoplasmic	150	17.6	5.35	6	2	1	High	0.002	5.676	1.89	262641	38685	182618	56496.8	116033	146639	124794	270893	154182	39449.6	77055.3	146296	210057	65357.3	192065	73323.6	117046	138703	150378	178526	152592	45645.4	71748.5	139463	0.703929	0.562875	0.66838	0.533456	0.0903246	0.160046	0.299423	0.33055
SP_1682	SP_1682	15901517	sugar ABC transporter permease	CytoplasmicMembrane	295	33.4	8.98	4	1	1	High	0.009	3.605	1.96	531909	260002	277802				92778.1			176124	380043	257568	419548	482608	292257	na	na	na	111118	na	na	208186	350037	245908	OFF	na	na	2.41224	na	na	0.136277	0.162396
SP_1683	SP_1683	15901518	sugar ABC transporter substrate-binding protein	Unknown	442	48.3	5.44	37	92	13	High	0	70.95	275.79	2.32628e+07	7.51319e+06	1.3977e+07	1.64502e+07	2.40726e+07	2.42516e+07	8.26955e+06	2.28192e+07	1.13411e+07	1.29149e+07	1.72073e+07	1.52666e+07	17165684	16471023	14949982	24513684	24417330	22363598	10628071	12955080	11159754	16198064	15462308	14355369	1.46737	0.00163117	0.0115789	1.32446	0.0148863	0.0437635	1.86386e-05	8.9033e-05
SP_1684	SP_1684	15901519	PTS system transporter subunit IIBC	CytoplasmicMembrane	505	54.4	7.81	2	3	1	High	0.009	3.596	4.54	506341	207398	347795	218289	385259	368325	208291		233101			277356	399404	379910	366176	292160	388829	345676	252245	na	230796	na	na	263945	0.896267	0.252868	0.364906	1.09285	na	na	0.00996813	0.016499
SP_1685	nanE2	15901520	N-acetylmannosamine-6-phosphate 2-epimerase (EC:5.1.3.9)	Cytoplasmic	232	25.4	4.91	13	21	4	High	0	13.341	47.56	2.10595e+06	1.10462e+06	2.52677e+06	1.96249e+06	2.38962e+06	1.67079e+06	1.69259e+06	2.06936e+06	2.19767e+06	1.41623e+06	2.23425e+06	1.28903e+06	1.62321e+06	2.19325e+06	2.68329e+06	2.76784e+06	2.41716e+06	1557148	2.11824e+06	1274208	2.17543e+06	1.72916e+06	2.03106e+06	1.22194e+06	1.03729	0.904802	0.937777	0.894804	0.67276	0.755635	0.554544	0.582708
SP_1695	SP_1695	15901529	acetyl xylan esterase	Cytoplasmic	326	37.4	5.38	7	2	2	High	0.002	6.348	1.83	674070	246278	540758	283748	365250	506482	136363	115996	160394	84736.9	91662.7	132849	529272	455369	570259	383017	368616	474566	163829	78611.2	158533	99176.2	85240.6	127091	0.788603	0.08018	0.161747	0.776879	0.466619	0.570643	7.89859e-05	0.000280888
SP_1697	SP_1697	15901531	ATP-dependent DNA helicase RecG	Cytoplasmic	671	75.3	6.27	25	64	12	High	0	55.637	195.3	1.8377e+07	5.57444e+06	1.1637e+07	8.2153e+06	1.15115e+07	1.34732e+07	8.0963e+06	1.86892e+07	1.03028e+07	8.28137e+06	9.66023e+06	1.03183e+07	13613500	12036431	12377835	12011216	11644788	12459934	10406197	10695968	10172891	10332989	8716142	9678815	0.949725	0.295834	0.406293	0.918558	0.166611	0.255137	0.00116913	0.00262726
SP_1698	alr	15901532	alanine racemase (EC:5.1.1.1)	Cytoplasmic	367	39.8	5.17	16	42	4	High	0	25.862	136.98	1.45194e+07	3.67303e+06	9.64275e+06	6.35205e+06	9.01864e+06	9.25519e+06	6.82139e+06	9.4568e+06	9.20025e+06	5.94114e+06	9.23011e+06	9.73723e+06	10774149	7768207	10278822	9221879	9131843	8562329	8738066	5.53532e+06	9087254	7378654	8.33058e+06	9154550	0.933898	0.604133	0.698828	1.06434	0.655095	0.743444	0.461465	0.490921
[truncated: 300 more rows]
